# Supplementary material for: ‘Remote’ behavioural ecology: do megaherbivores consume vegetation in proportion to its presence in the landscape?
Source: PeerJ. 2020 Feb 19;8:e8622. doi: 10.7717/peerj.8622 (PMC7035871; doi:10.7717/peerj.8622)
Supplement: Supplemental Information 1 [file peerj-08-8622-s001.xlsx]

## Sheet: 2km_buffer
Sample_ID	Material	Species	d13C	d15N	%C	%N	C/N	%C4	Month	Year	Season	Reserve	Part	Geology	Site_Name	FirstPublication	Elevation	latitude	longitude	CDW%	ODW%	CG%	DG%	AG%	BU%	CCW%	BA%	WA%	grassiness index
JF0011	Faeces	Loxodonta africana	-20.791	3.44475	42.7931	2.67528	15.9957	47.9212	February	2004	Wet	Kruger Park	South	Basalt	S28	J Codron et al (2011; Oecologia)	238m	-25.2367	31.9857	0.0339214	0.180795	0.704317	0.0759466	0	0	0	0	0.00502008	344.062
JF0012	Faeces	Loxodonta africana	-19.3327	3.0284	44.8998	2.15894	20.7971	58.3376	February	2004	Wet	Kruger Park	South	Basalt	Crocodile River	J Codron et al (2011; Oecologia)	179m	-25.3268	31.9232	0.129986	0.0491392	0.71736	0.0571019	0.0344333	0.00494978	0.00121951	0.00408895	0.00172166	326.901
JF0013	Faeces	Loxodonta africana	-18.5495	3.05066	44.8711	2.18778	20.5099	63.932	February	2004	Wet	Kruger Park	South	Basalt	Crocodile River	J Codron et al (2011; Oecologia)	179m	-25.3268	31.9232	0.129986	0.0491392	0.71736	0.0571019	0.0344333	0.00494978	0.00121951	0.00408895	0.00172166	326.901
JF0014	Faeces	Loxodonta africana	-21.1821	5.51135	44.6849	2.21843	20.1426	45.1275	February	2004	Wet	Kruger Park	South	Basalt	Crocodile River	J Codron et al (2011; Oecologia)	179m	-25.3268	31.9232	0.129986	0.0491392	0.71736	0.0571019	0.0344333	0.00494978	0.00121951	0.00408895	0.00172166	326.901
JF0015	Faeces	Loxodonta africana	-18.8046	0.320819	43.367	1.73561	24.9866	62.1101	February	2004	Wet	Kruger Park	South	Basalt	Crocodile River	J Codron et al (2011; Oecologia)	179m	-25.3268	31.9232	0.129986	0.0491392	0.71736	0.0571019	0.0344333	0.00494978	0.00121951	0.00408895	0.00172166	326.901
JF0016	Faeces	Loxodonta africana	-20.2618	5.14155	47.2449	2.20459	21.4303	51.5731	February	2004	Wet	Kruger Park	South	Basalt	Crocodile River	J Codron et al (2011; Oecologia)	179m	-25.3268	31.9232	0.129986	0.0491392	0.71736	0.0571019	0.0344333	0.00494978	0.00121951	0.00408895	0.00172166	326.901
JF0017	Faeces	Loxodonta africana	-16.8176	5.3462	43.8243	2.32313	18.8643	75.7436	February	2004	Wet	Kruger Park	South	Basalt	Crocodile River	J Codron et al (2011; Oecologia)	179m	-25.3268	31.9232	0.129986	0.0491392	0.71736	0.0571019	0.0344333	0.00494978	0.00121951	0.00408895	0.00172166	326.901
JF0018	Faeces	Loxodonta africana	-18.8414	3.54675	40.9742	2.55918	16.0106	61.5409	February	2004	Wet	Kruger Park	South	Basalt	Crocodile River	J Codron et al (2011; Oecologia)	179m	-25.3268	31.9232	0.129986	0.0491392	0.71736	0.0571019	0.0344333	0.00494978	0.00121951	0.00408895	0.00172166	326.901
JF0019	Faeces	Loxodonta africana	-18.1846	4.52627	41.298	2.20222	18.7529	66.1503	February	2004	Wet	Kruger Park	South	Basalt	Crocodile River	J Codron et al (2011; Oecologia)	179m	-25.3268	31.9232	0.129986	0.0491392	0.71736	0.0571019	0.0344333	0.00494978	0.00121951	0.00408895	0.00172166	326.901
JF0020	Faeces	Loxodonta africana	-19.4146	4.87508	36.836	2.14282	17.1904	57.5185	February	2004	Wet	Kruger Park	South	Basalt	Crocodile River	J Codron et al (2011; Oecologia)	179m	-25.3268	31.9232	0.129986	0.0491392	0.71736	0.0571019	0.0344333	0.00494978	0.00121951	0.00408895	0.00172166	326.901
JF0021	Faeces	Loxodonta africana	-18.6253	4.95868	42.4148	1.5129	28.0354	63.3908	February	2004	Wet	Kruger Park	South	Granite	H1-1	J Codron et al (2011; Oecologia)	308m	-25.0458	31.589	0.0618949	0.615506	0.0213727	0.295202	0	0.00265366	0	0.00337087	0	226.4
JF0022	Faeces	Loxodonta africana	-18.0283	5.68939	34.9551	1.28276	27.2499	67.6551	February	2004	Wet	Kruger Park	South	Granite	Renosterkoppies	J Codron et al (2011; Oecologia)	282m	-25.072	31.6105	0.0642524	0.560488	0.00501972	0.348153	0	0.00394407	0	0.0181427	0	224.977
JF0023	Faeces	Loxodonta africana	-17.3437	5.02099	44.4724	1.28188	34.6931	72.5453	February	2004	Wet	Kruger Park	South	Granite	Renosterkoppies	J Codron et al (2011; Oecologia)	282m	-25.072	31.6105	0.0642524	0.560488	0.00501972	0.348153	0	0.00394407	0	0.0181427	0	224.977
JF0024	Faeces	Loxodonta africana	-19.0607	5.72945	39.4064	1.82809	21.556	60.2807	February	2004	Wet	Kruger Park	South	Granite	Renosterkoppies	J Codron et al (2011; Oecologia)	282m	-25.072	31.6105	0.0642524	0.560488	0.00501972	0.348153	0	0.00394407	0	0.0181427	0	224.977
JF0025	Faeces	Loxodonta africana	-23.8803	3.96695	45.1485	2.77887	16.2471	25.8553	February	2004	Wet	Kruger Park	South	Granite	Maroela Loop	J Codron et al (2011; Oecologia)	255m	-24.9397	31.6699	0.158227	0.497418	0.0187921	0.254483	0	0.0136279	0	0.0542964	0.00315593	199.168
JF0026	Faeces	Loxodonta africana	-21.8332	5.39426	44.4336	2.20064	20.1912	40.9689	February	2004	Wet	Kruger Park	South	Granite	Maroela Loop	J Codron et al (2011; Oecologia)	255m	-24.9397	31.6699	0.158227	0.497418	0.0187921	0.254483	0	0.0136279	0	0.0542964	0.00315593	199.168
JF0027	Faeces	Loxodonta africana	-22.2904	6.17927	50.6401	2.172	23.3149	37.7371	February	2004	Wet	Kruger Park	South	Granite	Maroela Loop	J Codron et al (2011; Oecologia)	255m	-24.9397	31.6699	0.158227	0.497418	0.0187921	0.254483	0	0.0136279	0	0.0542964	0.00315593	199.168
JF0028	Faeces	Loxodonta africana	-20.2876	4.58108	32.6685	1.88058	17.3715	51.8926	February	2004	Wet	Kruger Park	South Central	Granite	S36	J Codron et al (2011; Oecologia)	272m	-24.8727	31.7563	0.0444604	0.0836142	0.651775	0.202366	0	0.00243815	0	0.0152743	7.17103e-05	342.589
JF0029	Faeces	Loxodonta africana	-21.0626	3.99131	44.4594	2.35926	18.8446	46.4152	February	2004	Wet	Kruger Park	South Central	Granite	S36	J Codron et al (2011; Oecologia)	374m	-24.8019	31.6897	0.00637856	0.122769	0.459328	0.411166	0	0	0	0.000358346	0	332.273
JF0030	Faeces	Loxodonta africana	-20.4754	4.02625	41.1808	2.0085	20.5033	50.5648	February	2004	Wet	Kruger Park	South Central	Granite	S36	J Codron et al (2011; Oecologia)	374m	-24.8019	31.6897	0.00637856	0.122769	0.459328	0.411166	0	0	0	0.000358346	0	332.273
JF0031	Faeces	Loxodonta africana	-19.8368	5.05254	26.7305	1.79721	14.8733	55.0784	February	2004	Wet	Kruger Park	South Central	Granite	S36	J Codron et al (2011; Oecologia)	374m	-24.8019	31.6897	0.00637856	0.122769	0.459328	0.411166	0	0	0	0.000358346	0	332.273
JF0032	Faeces	Loxodonta africana	-20.639	3.95496	44.0085	2.69961	16.3018	49.4087	February	2004	Wet	Kruger Park	South Central	Granite	S36	J Codron et al (2011; Oecologia)	374m	-24.8019	31.6897	0.00637856	0.122769	0.459328	0.411166	0	0	0	0.000358346	0	332.273
JF0033	Faeces	Loxodonta africana	-20.5632	3.62633	44.2708	2.3736	18.6514	49.9442	February	2004	Wet	Kruger Park	South Central	Granite	S36	J Codron et al (2011; Oecologia)	374m	-24.8019	31.6897	0.00637856	0.122769	0.459328	0.411166	0	0	0	0.000358346	0	332.273
JF0034	Faeces	Loxodonta africana	-21.7672	5.53699	47.5969	2.42532	19.625	41.0091	February	2004	Wet	Kruger Park	South Central	Basalt	Tshokwane	J Codron et al (2011; Oecologia)	258m	-24.811	31.8859	0.060882	0.0288275	0.785945	0.123987	0	0.000215131	0	0	0.000143421	363.428
JF0035	Faeces	Loxodonta africana	-22.1135	5.98215	46.7517	2.75771	16.953	38.5784	February	2004	Wet	Kruger Park	South Central	Basalt	Tshokwane	J Codron et al (2011; Oecologia)	258m	-24.811	31.8859	0.060882	0.0288275	0.785945	0.123987	0	0.000215131	0	0	0.000143421	363.428
JF0036	Faeces	Loxodonta africana	-22.554	7.18339	47.3113	2.20453	21.4609	35.4876	February	2004	Wet	Kruger Park	South Central	Basalt	Tshokwane	J Codron et al (2011; Oecologia)	258m	-24.811	31.8859	0.060882	0.0288275	0.785945	0.123987	0	0.000215131	0	0	0.000143421	363.428
JF0037	Faeces	Loxodonta africana	-22.6049	6.55862	45.913	2.76191	16.6236	35.1304	February	2004	Wet	Kruger Park	South Central	Basalt	Tshokwane	J Codron et al (2011; Oecologia)	258m	-24.811	31.8859	0.060882	0.0288275	0.785945	0.123987	0	0.000215131	0	0	0.000143421	363.428
JF0038	Faeces	Loxodonta africana	-21.8362	6.57883	45.954	2.46514	18.6416	40.5246	February	2004	Wet	Kruger Park	South Central	Basalt	Tshokwane	J Codron et al (2011; Oecologia)	258m	-24.811	31.8859	0.060882	0.0288275	0.785945	0.123987	0	0.000215131	0	0	0.000143421	363.428
JF0039	Faeces	Loxodonta africana	-22.7696	5.31847	45.8096	3.02533	15.142	33.9746	February	2004	Wet	Kruger Park	South Central	Basalt	Tshokwane	J Codron et al (2011; Oecologia)	258m	-24.811	31.8859	0.060882	0.0288275	0.785945	0.123987	0	0.000215131	0	0	0.000143421	363.428
JF0040	Faeces	Loxodonta africana	-20.5851	3.74057	43.1829	2.35508	18.336	49.3041	February	2004	Wet	Kruger Park	South Central	Basalt	Rietpan	J Codron et al (2011; Oecologia)	300m	-24.9027	31.915	0.0208737	0.00437558	0.773474	0.201277	0	0	0	0	0	372.735
JF0041	Faeces	Loxodonta africana	-20.8857	1.30513	44.5187	2.26313	19.6714	47.1949	February	2004	Wet	Kruger Park	South Central	Basalt	Rietpan	J Codron et al (2011; Oecologia)	300m	-24.9027	31.915	0.0208737	0.00437558	0.773474	0.201277	0	0	0	0	0	372.735
JF0042	Faeces	Loxodonta africana	-20.0309	4.85191	43.5762	3.06354	14.2241	53.1936	February	2004	Wet	Kruger Park	South Central	Basalt	Mlondozi	J Codron et al (2011; Oecologia)	278m	-24.9301	31.9148	0.0110481	0.0272616	0.736782	0.223402	0	0.00129134	0	0	0.000215223	368.29
JF0043	Faeces	Loxodonta africana	-20.2976	3.70496	44.6716	3.48524	12.8173	51.3219	February	2004	Wet	Kruger Park	South Central	Basalt	Mlondozi	J Codron et al (2011; Oecologia)	278m	-24.9301	31.9148	0.0110481	0.0272616	0.736782	0.223402	0	0.00129134	0	0	0.000215223	368.29
JF0044	Faeces	Loxodonta africana	-19.1874	4.48942	22.361	1.04465	21.4053	59.1126	February	2004	Wet	Kruger Park	South Central	Basalt	H1-10	J Codron et al (2011; Oecologia)	340m	-24.7649	31.7282	0.0241768	0.0400316	0.206256	0.669058	0	0.00222398	0	0.0582538	0	293.644
JF0051	Faeces	Loxodonta africana	-20.7846	5.80353	42.602	2.37378	17.9469	47.9103	February	2004	Wet	Kruger Park	North Central	Granite	Shikumbu	J Codron et al (2011; Oecologia)	394m	-23.9195	31.2315	0.00286779	0.293877	0.21107	0.483223	0	0.00616576	0	0.0027961	0	288.457
JF0055	Faeces	Loxodonta africana	-15.9735	4.15674	39.0688	1.59141	24.5499	79.7468	February	2004	Wet	Kruger Park	North Central	Basalt	Letaba	J Codron et al (2011; Oecologia)	266m	-23.8626	31.5591	0.11515	0.168925	0.269807	0.445114	7.17e-05	0.0005736	0	0.0002868	7.17e-05	286.757
JF0056	Faeces	Loxodonta africana	-18.6288	0.784479	43.2901	1.84969	23.4039	60.2326	February	2004	Wet	Kruger Park	North Central	Basalt	Letaba	J Codron et al (2011; Oecologia)	259m	-23.8453	31.5717	0.119854	0.196815	0.361856	0.246163	0.000143451	0.0263233	0	0.0433223	0.00552288	269.94
JF0057	Faeces	Loxodonta africana	-19.0863	5.36966	43.5984	2.40424	18.1339	56.8703	February	2004	Wet	Kruger Park	North Central	Basalt	Letaba	J Codron et al (2011; Oecologia)	259m	-23.8453	31.5717	0.119854	0.196815	0.361856	0.246163	0.000143451	0.0263233	0	0.0433223	0.00552288	269.94
JF0058	Faeces	Loxodonta africana	-18.9795	3.19903	43.7359	1.44252	30.3192	57.6552	February	2004	Wet	Kruger Park	North Central	Basalt	Letaba	J Codron et al (2011; Oecologia)	271m	-23.7996	31.5807	0.100387	0.212319	0.320737	0.260863	0	0.0268177	0	0.0769396	0.00193604	259.056
JF0059	Faeces	Loxodonta africana	-19.3528	1.52002	40.4067	2.16328	18.6784	54.9113	February	2004	Wet	Kruger Park	North Central	Basalt	Letaba	J Codron et al (2011; Oecologia)	271m	-23.7996	31.5807	0.100387	0.212319	0.320737	0.260863	0	0.0268177	0	0.0769396	0.00193604	259.056
JF0060	Faeces	Loxodonta africana	-20.4263	5.7417	41.6914	2.04431	20.3938	47.0222	February	2004	Wet	Kruger Park	North Central	Basalt	Letaba	J Codron et al (2011; Oecologia)	271m	-23.7996	31.5807	0.100387	0.212319	0.320737	0.260863	0	0.0268177	0	0.0769396	0.00193604	259.056
JF0061	Faeces	Loxodonta africana	-17.5965	7.09285	46.4706	1.8106	25.6659	67.8185	February	2004	Wet	Kruger Park	North Central	Basalt	Letaba	J Codron et al (2011; Oecologia)	271m	-23.7996	31.5807	0.100387	0.212319	0.320737	0.260863	0	0.0268177	0	0.0769396	0.00193604	259.056
JF0062	Faeces	Loxodonta africana	-18.5291	5.71231	42.9869	2.00382	21.4525	60.9651	February	2004	Wet	Kruger Park	North Central	Basalt	Letaba	J Codron et al (2011; Oecologia)	271m	-23.7996	31.5807	0.100387	0.212319	0.320737	0.260863	0	0.0268177	0	0.0769396	0.00193604	259.056
JF0063	Faeces	Loxodonta africana	-19.2092	4.31824	34.1068	2.27065	15.0207	55.967	February	2004	Wet	Kruger Park	North Central	Basalt	Letaba	J Codron et al (2011; Oecologia)	271m	-23.7996	31.5807	0.100387	0.212319	0.320737	0.260863	0	0.0268177	0	0.0769396	0.00193604	259.056
JF0064	Faeces	Loxodonta africana	-22.6518	6.53434	45.7826	2.06263	22.1962	30.6662	February	2004	Wet	Kruger Park	North Central	Basalt	Letaba	J Codron et al (2011; Oecologia)	271m	-23.7996	31.5807	0.100387	0.212319	0.320737	0.260863	0	0.0268177	0	0.0769396	0.00193604	259.056
JF0065	Faeces	Loxodonta africana	-19.52	6.41421	46.5727	1.67879	27.7419	53.6828	February	2004	Wet	Kruger Park	North Central	Basalt	Letaba	J Codron et al (2011; Oecologia)	271m	-23.7996	31.5807	0.100387	0.212319	0.320737	0.260863	0	0.0268177	0	0.0769396	0.00193604	259.056
JF0101	Faeces	Loxodonta africana	-21.4123	3.05734	45.9054	2.14466	21.4045	43.9434	March	2004	Wet	Kruger Park	South	Granite	S3	J Codron et al (2011; Oecologia)		-25.1521	31.2024	0.18737	0.550355	0.00982008	0.243352	7.16794e-05	0.00795642	0	0.000931833	0.000143359	205.742
JF0102	Faeces	Loxodonta africana	-20.2915	2.89791	38.5973	2.17313	17.7612	51.8649	March	2004	Wet	Kruger Park	South	Granite	S3	J Codron et al (2011; Oecologia)		-25.1521	31.2024	0.18737	0.550355	0.00982008	0.243352	7.16794e-05	0.00795642	0	0.000931833	0.000143359	205.742
JF0103	Faeces	Loxodonta africana	-20.5214	3.57106	43.8559	1.2583	34.8534	50.2398	March	2004	Wet	Kruger Park	South	Granite	S3	J Codron et al (2011; Oecologia)		-25.1521	31.2024	0.18737	0.550355	0.00982008	0.243352	7.16794e-05	0.00795642	0	0.000931833	0.000143359	205.742
JF0104	Faeces	Loxodonta africana	-20.3952	-0.298422	43.9631	2.22961	19.7178	51.132	March	2004	Wet	Kruger Park	South	Granite	S3	J Codron et al (2011; Oecologia)		-25.1521	31.2024	0.18737	0.550355	0.00982008	0.243352	7.16794e-05	0.00795642	0	0.000931833	0.000143359	205.742
JF0105	Faeces	Loxodonta africana	-21.9912	1.20732	45.3195	1.98063	22.8814	39.852	March	2004	Wet	Kruger Park	South	Granite	S3	J Codron et al (2011; Oecologia)		-25.1521	31.2024	0.18737	0.550355	0.00982008	0.243352	7.16794e-05	0.00795642	0	0.000931833	0.000143359	205.742
JF0106	Faeces	Loxodonta africana	-20.5244	4.68239	39.4688	2.29789	17.1761	50.2185	March	2004	Wet	Kruger Park	South	Granite	S3	J Codron et al (2011; Oecologia)		-25.1521	31.2024	0.18737	0.550355	0.00982008	0.243352	7.16794e-05	0.00795642	0	0.000931833	0.000143359	205.742
JF0107	Faeces	Loxodonta africana	-21.358	4.21929	42.6014	2.38567	17.8572	44.3274	March	2004	Wet	Kruger Park	South	Granite	S3	J Codron et al (2011; Oecologia)		-25.1521	31.2024	0.18737	0.550355	0.00982008	0.243352	7.16794e-05	0.00795642	0	0.000931833	0.000143359	205.742
JF0108	Faeces	Loxodonta africana	-22.8416	3.87458	35.981	1.47132	24.4549	33.8418	March	2004	Wet	Kruger Park	South	Granite	S3	J Codron et al (2011; Oecologia)		-25.1521	31.2024	0.18737	0.550355	0.00982008	0.243352	7.16794e-05	0.00795642	0	0.000931833	0.000143359	205.742
JF0109	Faeces	Loxodonta africana	-19.3872	4.34248	46.6797	2.20242	21.1948	58.2558	March	2004	Wet	Kruger Park	South	Granite	S3	J Codron et al (2011; Oecologia)		-25.1064	31.2241	0.0347053	0.602108	0.0069554	0.351714	0	0.00179263	0	0.000358526	0.00236627	232.188
JF0110	Faeces	Loxodonta africana	-19.2313	4.58411	47.2043	2.44942	19.2716	59.3579	March	2004	Wet	Kruger Park	South	Granite	S3	J Codron et al (2011; Oecologia)		-25.1064	31.2241	0.0347053	0.602108	0.0069554	0.351714	0	0.00179263	0	0.000358526	0.00236627	232.188
JF0111	Faeces	Loxodonta africana	-19.2491	2.60369	41.1049	2.95022	13.9328	58.6798	March	2004	Wet	Kruger Park	South Central	Basalt	Tshokwane	J Codron et al (2011; Oecologia)	258m	-24.8018	31.8563	0.019079	0.0367236	0.843997	0.0992684	0	0.000286903	0	0.000645531	0	376.632
JF0112	Faeces	Loxodonta africana	-19.957	6.33916	44.4591	1.2421	35.7935	53.7125	March	2004	Wet	Kruger Park	South Central	Basalt	Tshokwane	J Codron et al (2011; Oecologia)	258m	-24.8018	31.8563	0.019079	0.0367236	0.843997	0.0992684	0	0.000286903	0	0.000645531	0	376.632
JF0113	Faeces	Loxodonta africana	-20.259	5.41877	43.7021	1.23528	35.3782	51.5927	March	2004	Wet	Kruger Park	South Central	Basalt	Tshokwane	J Codron et al (2011; Oecologia)	258m	-24.8018	31.8563	0.019079	0.0367236	0.843997	0.0992684	0	0.000286903	0	0.000645531	0	376.632
JF0114	Faeces	Loxodonta africana	-17.5116	4.01505	41.8828	2.09772	19.9659	70.8729	March	2004	Wet	Kruger Park	South Central	Basalt	Tshokwane	J Codron et al (2011; Oecologia)	258m	-24.8018	31.8563	0.019079	0.0367236	0.843997	0.0992684	0	0.000286903	0	0.000645531	0	376.632
JF0115	Faeces	Loxodonta africana	-16.8199	4.81571	42.744	2.18491	19.5633	75.7269	March	2004	Wet	Kruger Park	South Central	Basalt	Orpen Dam	J Codron et al (2011; Oecologia)		-24.7918	31.8911	0.0805307	0.0884188	0.382288	0.434636	0	0.00200789	0	0.00250986	0.00960918	309.043
JF0116	Faeces	Loxodonta africana	-18.1018	5.57884	34.5849	1.77108	19.5276	66.7315	March	2004	Wet	Kruger Park	South Central	Basalt	Orpen Dam	J Codron et al (2011; Oecologia)		-24.7918	31.8911	0.0805307	0.0884188	0.382288	0.434636	0	0.00200789	0	0.00250986	0.00960918	309.043
JF0117	Faeces	Loxodonta africana	-17.491	5.81122	39.365	1.79153	21.9729	71.0178	March	2004	Wet	Kruger Park	South Central	Basalt	Orpen Dam	J Codron et al (2011; Oecologia)		-24.7918	31.8911	0.0805307	0.0884188	0.382288	0.434636	0	0.00200789	0	0.00250986	0.00960918	309.043
JF0118	Faeces	Loxodonta africana	-20.2164	6.59518	44.3423	2.21175	20.0485	52.3958	March	2004	Wet	Kruger Park	South Central	Granite	Leeupan	J Codron et al (2011; Oecologia)		-24.8787	31.7667	0.0452362	0.0505413	0.673812	0.222955	0	0.00143379	0	0.00595025	7.16897e-05	351.043
JF0119	Faeces	Loxodonta africana	-18.0039	0.886146	44.5142	1.57111	28.3329	68.033	March	2004	Wet	Kruger Park	South Central	Granite	Leeupan	J Codron et al (2011; Oecologia)		-24.8787	31.7667	0.0452362	0.0505413	0.673812	0.222955	0	0.00143379	0	0.00595025	7.16897e-05	351.043
JF0120	Faeces	Loxodonta africana	-20.8508	6.18271	44.2151	1.97776	22.3562	47.9119	March	2004	Wet	Kruger Park	South Central	Granite	Leeupan	J Codron et al (2011; Oecologia)		-24.8787	31.7667	0.0452362	0.0505413	0.673812	0.222955	0	0.00143379	0	0.00595025	7.16897e-05	351.043
JF0121	Faeces	Loxodonta africana	-18.4421	5.2216	43.64	1.84429	23.6622	64.9357	March	2004	Wet	Kruger Park	South Central	Granite	Leeupan	J Codron et al (2011; Oecologia)		-24.8787	31.7667	0.0452362	0.0505413	0.673812	0.222955	0	0.00143379	0	0.00595025	7.16897e-05	351.043
JF0122	Faeces	Loxodonta africana	-17.6757	2.41114	42.0148	2.11119	19.901	70.3527	March	2004	Wet	Kruger Park	South Central	Granite	Leeupan	J Codron et al (2011; Oecologia)		-24.8787	31.7667	0.0452362	0.0505413	0.673812	0.222955	0	0.00143379	0	0.00595025	7.16897e-05	351.043
JF0123	Faeces	Loxodonta africana	-16.6943	6.65572	44.532	2.06049	21.6124	77.2884	March	2004	Wet	Kruger Park	South Central	Granite	Leeupan	J Codron et al (2011; Oecologia)		-24.8787	31.7667	0.0452362	0.0505413	0.673812	0.222955	0	0.00143379	0	0.00595025	7.16897e-05	351.043
JF0124	Faeces	Loxodonta africana	-16.8885	4.05167	40.9778	2.1014	19.5003	75.246	March	2004	Wet	Kruger Park	South	Basalt	Lower Sabie	J Codron et al (2011; Oecologia)		-25.0938	31.9128	0.0367157	0.21384	0.654213	0.0875583	0	0.0041592	0	0.000717103	0.0027967	334.392
JF0125	Faeces	Loxodonta africana	-17.205	2.06763	41.2543	2.10458	19.6022	73.0249	March	2004	Wet	Kruger Park	South	Basalt	S128	J Codron et al (2011; Oecologia)	201m	-25.0938	31.9128	0.0367157	0.21384	0.654213	0.0875583	0	0.0041592	0	0.000717103	0.0027967	334.392
JF0126	Faeces	Loxodonta africana	-19.2446	3.37466	40.4847	2.1839	18.5378	58.7115	March	2004	Wet	Kruger Park	South	Basalt	S128	J Codron et al (2011; Oecologia)	201m	-25.0938	31.9128	0.0367157	0.21384	0.654213	0.0875583	0	0.0041592	0	0.000717103	0.0027967	334.392
JF0127	Faeces	Loxodonta africana	-18.7902	3.28147	31.9195	1.7148	18.6141	61.9007	March	2004	Wet	Kruger Park	South	Basalt	S128	J Codron et al (2011; Oecologia)	201m	-25.0938	31.9128	0.0367157	0.21384	0.654213	0.0875583	0	0.0041592	0	0.000717103	0.0027967	334.392
JF0128	Faeces	Loxodonta africana	-22.7378	0.125188	44.3195	2.51725	17.6063	34.1976	March	2004	Wet	Kruger Park	South	Basalt	S128	J Codron et al (2011; Oecologia)	201m	-25.0938	31.9128	0.0367157	0.21384	0.654213	0.0875583	0	0.0041592	0	0.000717103	0.0027967	334.392
JF0129	Faeces	Loxodonta africana	-18.4489	2.95808	34.9707	1.8564	18.8379	64.2952	March	2004	Wet	Kruger Park	South	Basalt	S128	J Codron et al (2011; Oecologia)	201m	-25.0938	31.9128	0.0367157	0.21384	0.654213	0.0875583	0	0.0041592	0	0.000717103	0.0027967	334.392
JF0130	Faeces	Loxodonta africana	-19.9031	3.35889	38.3119	2.02026	18.9638	54.0902	March	2004	Wet	Kruger Park	South	Basalt	S128	J Codron et al (2011; Oecologia)	201m	-25.0938	31.9128	0.0367157	0.21384	0.654213	0.0875583	0	0.0041592	0	0.000717103	0.0027967	334.392
JF0131	Faeces	Loxodonta africana	-20.097	4.81012	46.9548	1.47237	31.8906	52.7297	March	2004	Wet	Kruger Park	South	Basalt	Salitje	J Codron et al (2011; Oecologia)	184m	-25.1133	31.9275	0.136523	0.236602	0.485401	0.108903	0.00200875	0.00172179	0	0.000430447	0.0284095	287.804
JF0132	Faeces	Loxodonta africana	-20.6468	5.06119	47.7715	1.81398	26.3351	48.8717	March	2004	Wet	Kruger Park	South	Basalt	Salitje	J Codron et al (2011; Oecologia)	184m	-25.1133	31.9275	0.136523	0.236602	0.485401	0.108903	0.00200875	0.00172179	0	0.000430447	0.0284095	287.804
JF0168	Faeces	Loxodonta africana	-21.8973	2.68053	45.8256	1.85096	24.7578	43.0152	April	2004	Dry	Kruger Park	North Central	Basalt	Letaba	J Codron et al (2011; Oecologia)	266m	-23.8626	31.5591	0.11515	0.168925	0.269807	0.445114	7.17e-05	0.0005736	0	0.0002868	7.17e-05	286.757
JF0169	Faeces	Loxodonta africana	-23.5847	5.47618	45.305	1.78205	25.423	30.3623	April	2004	Dry	Kruger Park	North Central	Basalt	Letaba	J Codron et al (2011; Oecologia)	266m	-23.8626	31.5591	0.11515	0.168925	0.269807	0.445114	7.17e-05	0.0005736	0	0.0002868	7.17e-05	286.757
JF0171	Faeces	Loxodonta africana	-20.7351	5.04908	43.8066	0.97441	44.957	51.7297	April	2004	Dry	Kruger Park	North Central	Basalt	Letaba	J Codron et al (2011; Oecologia)	266m	-23.8626	31.5591	0.11515	0.168925	0.269807	0.445114	7.17e-05	0.0005736	0	0.0002868	7.17e-05	286.757
JF0176	Faeces	Loxodonta africana	-22.4684	5.50971	45.2511	2.07567	21.8007	39.7888	April	2004	Dry	Kruger Park	North Central	Granite	Vudogwa	J Codron et al (2011; Oecologia)	323m	-23.9468	31.2439	0.0145436	0.173664	0.104671	0.6761	0	0.0209199	0	0.00515833	0.0049434	280.886
JF0177	Faeces	Loxodonta africana	-22.9588	5.11355	45.3117	2.11583	21.4156	37.631	April	2004	Dry	Kruger Park	South	Granite	Albasini Rd	J Codron et al (2011; Oecologia)	483m	-25.0479	31.27	0.00523335	0.302316	0.0470285	0.644204	0	0.000860277	0	0.000358449	0	273.059
JF0178	Faeces	Loxodonta africana	-24.1696	4.79434	45.2705	1.91562	23.6323	29.0298	April	2004	Dry	Kruger Park	South	Granite	Doispane Rd	J Codron et al (2011; Oecologia)	326m	-25.0021	31.4834	0.0262516	0.526539	0.213599	0.224573	0	0.00580978	0	0.00208005	0.00114761	260.745
JF0179	Faeces	Loxodonta africana	-24.4738	6.36979	45.8265	1.57218	29.1485	26.8691	April	2004	Dry	Kruger Park	South	Granite	Sabie River	J Codron et al (2011; Oecologia)	282m	-24.9349	31.7017	0.0371459	0.525636	0.00451775	0.432198	0	0	0	0.000501972	0	240.308
JF0180	Faeces	Loxodonta africana	-26.549	7.20677	44.1058	1.7588	25.0772	12.1279	April	2004	Dry	Kruger Park	South	Granite	Sabie River	J Codron et al (2011; Oecologia)	282m	-24.9349	31.7017	0.0371459	0.525636	0.00451775	0.432198	0	0	0	0.000501972	0	240.308
JF0181	Faeces	Loxodonta africana	-24.67	6.65447	44.6196	1.82416	24.4603	25.4755	April	2004	Dry	Kruger Park	South	Granite	Sabie River	J Codron et al (2011; Oecologia)	282m	-24.9349	31.7017	0.0371459	0.525636	0.00451775	0.432198	0	0	0	0.000501972	0	240.308
JF0182	Faeces	Loxodonta africana	-22.6621	6.17588	43.6752	0.951108	45.9204	39.739	April	2004	Dry	Kruger Park	South Central	Granite	H1-2	J Codron et al (2011; Oecologia)	316m	-24.9089	31.7183	0.0218826	0.431052	0.0716028	0.471732	0	0.000358732	0	0.00337208	0	258.559
JF0183	Faeces	Loxodonta africana	-22.6443	5.80275	43.331	1.8596	23.3012	39.8651	April	2004	Dry	Kruger Park	South Central	Granite	H1-2	J Codron et al (2011; Oecologia)	316m	-24.9089	31.7183	0.0218826	0.431052	0.0716028	0.471732	0	0.000358732	0	0.00337208	0	258.559
JF0184	Faeces	Loxodonta africana	-22.8639	6.12472	45.5515	2.38826	19.0731	38.305	April	2004	Dry	Kruger Park	South Central	Granite	H1-2	J Codron et al (2011; Oecologia)	316m	-24.9089	31.7183	0.0218826	0.431052	0.0716028	0.471732	0	0.000358732	0	0.00337208	0	258.559
JF0185	Faeces	Loxodonta africana	-22.7439	6.22969	43.6752	5.03293	8.67789	39.1575	April	2004	Dry	Kruger Park	South Central	Granite	H1-2	J Codron et al (2011; Oecologia)	316m	-24.9089	31.7183	0.0218826	0.431052	0.0716028	0.471732	0	0.000358732	0	0.00337208	0	258.559
JF0186	Faeces	Loxodonta africana	-25.425	7.08188	43.1237	2.43847	17.6847	20.1122	April	2004	Dry	Kruger Park	South Central	Granite	H1-2	J Codron et al (2011; Oecologia)	316m	-24.9089	31.7183	0.0218826	0.431052	0.0716028	0.471732	0	0.000358732	0	0.00337208	0	258.559
JF0187	Faeces	Loxodonta africana	-25.5613	6.94155	44.4153	1.81871	24.4214	19.144	April	2004	Dry	Kruger Park	South Central	Granite	H1-2	J Codron et al (2011; Oecologia)	316m	-24.9089	31.7183	0.0218826	0.431052	0.0716028	0.471732	0	0.000358732	0	0.00337208	0	258.559
JF0188	Faeces	Loxodonta africana	-23.1536	5.56073	41.95	1.63703	25.6257	38.7693	April	2004	Dry	Kruger Park	South	Basalt	Mativuhlungu	J Codron et al (2011; Oecologia)	194m	-25.1323	31.9096	0.0336321	0.320115	0.559412	0.0686267	0.0013625	0.000932234	0	0	0.0159197	311.739
JF0189	Faeces	Loxodonta africana	-25.2995	5.88012	42.6122	1.36329	31.257	24.2807	April	2004	Dry	Kruger Park	South	Basalt	Mativuhlungu	J Codron et al (2011; Oecologia)	194m	-25.1323	31.9096	0.0336321	0.320115	0.559412	0.0686267	0.0013625	0.000932234	0	0	0.0159197	311.739
JF0190	Faeces	Loxodonta africana	-25.2139	6.23287	44.896	1.59758	28.1026	24.8591	April	2004	Dry	Kruger Park	South	Basalt	Mativuhlungu	J Codron et al (2011; Oecologia)	194m	-25.1323	31.9096	0.0336321	0.320115	0.559412	0.0686267	0.0013625	0.000932234	0	0	0.0159197	311.739
JF0191	Faeces	Loxodonta africana	-23.4389	5.67243	41.6482	1.73444	24.0125	36.8432	April	2004	Dry	Kruger Park	South	Basalt	Mativuhlungu	J Codron et al (2011; Oecologia)	194m	-25.1323	31.9096	0.0336321	0.320115	0.559412	0.0686267	0.0013625	0.000932234	0	0	0.0159197	311.739
JF0192	Faeces	Loxodonta africana	-18.8703	3.86624	44.1231	1.9139	23.0541	67.6893	April	2004	Dry	Kruger Park	South	Basalt	Mlondozi	J Codron et al (2011; Oecologia)	278m	-24.9301	31.9148	0.0110481	0.0272616	0.736782	0.223402	0	0.00129134	0	0	0.000215223	368.29
JF0193	Faeces	Loxodonta africana	-22.3915	5.18309	43.4798	1.13536	38.2959	43.9147	April	2004	Dry	Kruger Park	South Central	Basalt	Muntshe	J Codron et al (2011; Oecologia)	270m	-24.9271	31.9179	0.0136976	0.0207258	0.776606	0.187823	0	0.000932301	0	0	0.000215146	372.504
JF0194	Faeces	Loxodonta africana	-20.4832	5.19833	43.3054	1.7963	24.1081	56.7993	April	2004	Dry	Kruger Park	South Central	Basalt	Muntshe	J Codron et al (2011; Oecologia)	270m	-24.9271	31.9179	0.0136976	0.0207258	0.776606	0.187823	0	0.000932301	0	0	0.000215146	372.504
JF0195	Faeces	Loxodonta africana	-20.9252	5.26675	43.2176	2.14235	20.173	53.8149	April	2004	Dry	Kruger Park	South Central	Basalt	Muntshe	J Codron et al (2011; Oecologia)	270m	-24.9271	31.9179	0.0136976	0.0207258	0.776606	0.187823	0	0.000932301	0	0	0.000215146	372.504
JF0196	Faeces	Loxodonta africana	-19.0381	5.89397	43.4798	3.46618	12.544	66.5563	April	2004	Dry	Kruger Park	South Central	Basalt	Muntshe	J Codron et al (2011; Oecologia)	270m	-24.9271	31.9179	0.0136976	0.0207258	0.776606	0.187823	0	0.000932301	0	0	0.000215146	372.504
JF0197	Faeces	Loxodonta africana	-19.5842	4.87025	37.6616	1.3424	28.0554	62.8691	April	2004	Dry	Kruger Park	South Central	Basalt	Muntshe	J Codron et al (2011; Oecologia)	270m	-24.9271	31.9179	0.0136976	0.0207258	0.776606	0.187823	0	0.000932301	0	0	0.000215146	372.504
JF0198	Faeces	Loxodonta africana	-23.8022	2.87611	44.6959	2.00274	22.3174	34.3902	April	2004	Dry	Kruger Park	South	Basalt	Mlondozi	J Codron et al (2011; Oecologia)	278m	-24.9301	31.9148	0.0110481	0.0272616	0.736782	0.223402	0	0.00129134	0	0	0.000215223	368.29
JF0222	Faeces	Loxodonta africana	-22.9417	6.35715	47.3632	1.96433	24.1116	36.5162	May	2004	Dry	Kruger Park	North Central	Granite	Masorini	J Codron et al (2011; Oecologia)	421m	-23.9201	31.2686	0.0025095	0.0967233	0.229583	0.656342	7.17e-05	0.0132645	0	0.0007887	0.000717	308.332
JF0223	Faeces	Loxodonta africana	-22.2653	6.19905	46.0573	1.76891	26.0372	41.1933	May	2004	Dry	Kruger Park	North Central	Granite	Masorini	J Codron et al (2011; Oecologia)	421m	-23.9201	31.2686	0.0025095	0.0967233	0.229583	0.656342	7.17e-05	0.0132645	0	0.0007887	0.000717	308.332
JF0224	Faeces	Loxodonta africana	-21.8496	5.37753	58.7773	1.43484	40.9645	44.0674	May	2004	Dry	Kruger Park	North Central	Granite	Masorini	J Codron et al (2011; Oecologia)	421m	-23.9201	31.2686	0.0025095	0.0967233	0.229583	0.656342	7.17e-05	0.0132645	0	0.0007887	0.000717	308.332
JF0225	Faeces	Loxodonta africana	-21.5083	6.09805	44.2673	1.71018	25.8845	46.4273	May	2004	Dry	Kruger Park	North Central	Granite	Masorini	J Codron et al (2011; Oecologia)	421m	-23.9201	31.2686	0.0025095	0.0967233	0.229583	0.656342	7.17e-05	0.0132645	0	0.0007887	0.000717	308.332
JF0226	Faeces	Loxodonta africana	-24.5008	4.00465	46.464	1.85299	25.0751	25.7367	May	2004	Dry	Kruger Park	North Central	Granite	Erfplaas	J Codron et al (2011; Oecologia)	414m	-23.9213	31.3037	0.00100358	0.135627	0.187025	0.654409	0	0.0206452	0	0.00129032	0	298.358
JF0227	Faeces	Loxodonta africana	-22.0737	5.66956	57.1603	1.27893	44.6937	41.6922	May	2004	Dry	Kruger Park	North Central	Basalt	Letaba	J Codron et al (2011; Oecologia)	266m	-23.8626	31.5591	0.11515	0.168925	0.269807	0.445114	7.17e-05	0.0005736	0	0.0002868	7.17e-05	286.757
JF0228	Faeces	Loxodonta africana	-23.0251	5.5435	44.6315	1.48207	30.1143	34.5585	May	2004	Dry	Kruger Park	North Central	Basalt	Letaba	J Codron et al (2011; Oecologia)	266m	-23.8626	31.5591	0.11515	0.168925	0.269807	0.445114	7.17e-05	0.0005736	0	0.0002868	7.17e-05	286.757
JF0229	Faeces	Loxodonta africana	-24.0964	6.68766	49.6153	2.23887	22.1609	26.5252	May	2004	Dry	Kruger Park	North Central	Basalt	Letaba	J Codron et al (2011; Oecologia)	266m	-23.8626	31.5591	0.11515	0.168925	0.269807	0.445114	7.17e-05	0.0005736	0	0.0002868	7.17e-05	286.757
JF0230	Faeces	Loxodonta africana	-21.9941	5.908	43.9795	1.78537	24.6333	42.2892	May	2004	Dry	Kruger Park	North Central	Basalt	Letaba	J Codron et al (2011; Oecologia)	266m	-23.8626	31.5591	0.11515	0.168925	0.269807	0.445114	7.17e-05	0.0005736	0	0.0002868	7.17e-05	286.757
JF0231	Faeces	Loxodonta africana	-24.1345	6.63582	46.856	2.25552	20.774	26.2396	May	2004	Dry	Kruger Park	North Central	Basalt	Letaba	J Codron et al (2011; Oecologia)	266m	-23.8626	31.5591	0.11515	0.168925	0.269807	0.445114	7.17e-05	0.0005736	0	0.0002868	7.17e-05	286.757
JF0232	Faeces	Loxodonta africana	-25.3455	7.80074	44.816	1.76853	25.3409	20.6765	May	2004	Dry	Kruger Park	South Central	Granite	Ngwenyeni	J Codron et al (2011; Oecologia)	329m	-24.6096	31.6691	0.0506992	0.409251	0.324489	0.201219	0	0.0101829	0	0.0041592	0	277.081
JF0233	Faeces	Loxodonta africana	-24.2122	4.40281	37.3804	1.73298	21.57	28.7272	May	2004	Dry	Kruger Park	South Central	Granite	Ngwenyeni	J Codron et al (2011; Oecologia)	329m	-24.6096	31.6691	0.0506992	0.409251	0.324489	0.201219	0	0.0101829	0	0.0041592	0	277.081
JF0234	Faeces	Loxodonta africana	-25.5828	5.73662	46.75	1.21444	38.4952	18.991	May	2004	Dry	Kruger Park	South Central	Granite	Ngwenyeni	J Codron et al (2011; Oecologia)	329m	-24.6096	31.6691	0.0506992	0.409251	0.324489	0.201219	0	0.0101829	0	0.0041592	0	277.081
JF0235	Faeces	Loxodonta africana	-25.7084	7.18105	44.4839	1.87161	23.7677	18.099	May	2004	Dry	Kruger Park	South Central	Granite	Nhlanguleni	J Codron et al (2011; Oecologia)	349m	-24.7099	31.6574	0.013341	0.0918806	0.335605	0.521589	0	0.000215177	0	0.0373691	0	310.429
JF0236	Faeces	Loxodonta africana	-23.4309	5.60286	41.2869	1.52334	27.1029	34.2773	May	2004	Dry	Kruger Park	South Central	Granite	Lugmag	J Codron et al (2011; Oecologia)	342m	-24.7242	31.6665	0.0237993	0.0628674	0.220502	0.64086	0	0.000573477	0	0.0508244	0.000573477	295.412
JF0237	Faeces	Loxodonta africana	-21.9495	6.66189	49.3666	1.61997	30.4737	46.8993	May	2004	Dry	Kruger Park	South Central	Basalt	Orpen Dam	J Codron et al (2011; Oecologia)		-24.7918	31.8911	0.0805307	0.0884188	0.382288	0.434636	0	0.00200789	0	0.00250986	0.00960918	309.043
JF0238	Faeces	Loxodonta africana	-18.2355	4.54589	49.7852	1.20259	41.3985	71.9754	May	2004	Dry	Kruger Park	South Central	Basalt	Orpen Dam	J Codron et al (2011; Oecologia)		-24.7918	31.8911	0.0805307	0.0884188	0.382288	0.434636	0	0.00200789	0	0.00250986	0.00960918	309.043
JF0239	Faeces	Loxodonta africana	-24.2406	6.80314	46.5849	1.59649	29.1796	31.4307	May	2004	Dry	Kruger Park	South Central	Basalt	Orpen Dam	J Codron et al (2011; Oecologia)		-24.7918	31.8911	0.0805307	0.0884188	0.382288	0.434636	0	0.00200789	0	0.00250986	0.00960918	309.043
JF0240	Faeces	Loxodonta africana	-24.1406	7.21599	47.2745	1.96186	24.0968	32.1054	May	2004	Dry	Kruger Park	South Central	Basalt	Orpen Dam	J Codron et al (2011; Oecologia)		-24.7918	31.8911	0.0805307	0.0884188	0.382288	0.434636	0	0.00200789	0	0.00250986	0.00960918	309.043
JF0241	Faeces	Loxodonta africana	-24.0941	6.94753	46.5523	1.92062	24.2381	32.4192	May	2004	Dry	Kruger Park	South Central	Basalt	Orpen Dam	J Codron et al (2011; Oecologia)		-24.7918	31.8911	0.0805307	0.0884188	0.382288	0.434636	0	0.00200789	0	0.00250986	0.00960918	309.043
JF0257	Faeces	Loxodonta africana	-25.7795	6.23717	54.5431	1.29717	42.0478	21.0403	May	2004	Dry	Kruger Park	South	Basalt	Mativuhlungu	J Codron et al (2011; Oecologia)	194m	-25.1323	31.9096	0.0336321	0.320115	0.559412	0.0686267	0.0013625	0.000932234	0	0	0.0159197	311.739
JF0258	Faeces	Loxodonta africana	-25.881	5.60085	45.5342	1.69334	26.8902	20.355	May	2004	Dry	Kruger Park	South	Basalt	Mativuhlungu	J Codron et al (2011; Oecologia)	194m	-25.1323	31.9096	0.0336321	0.320115	0.559412	0.0686267	0.0013625	0.000932234	0	0	0.0159197	311.739
JF0259	Faeces	Loxodonta africana	-22.3814	4.3246	55.0141	1.19708	45.9569	43.9833	May	2004	Dry	Kruger Park	South	Basalt	Mativuhlungu	J Codron et al (2011; Oecologia)	194m	-25.1323	31.9096	0.0336321	0.320115	0.559412	0.0686267	0.0013625	0.000932234	0	0	0.0159197	311.739
JF0260	Faeces	Loxodonta africana	-26.0405	6.1657	60.0905	1.56355	38.432	19.2782	May	2004	Dry	Kruger Park	South	Basalt	Mativuhlungu	J Codron et al (2011; Oecologia)	194m	-25.1323	31.9096	0.0336321	0.320115	0.559412	0.0686267	0.0013625	0.000932234	0	0	0.0159197	311.739
JF0261	Faeces	Loxodonta africana	-25.9717	6.26844	57.4522	1.48399	38.7147	19.7426	May	2004	Dry	Kruger Park	South	Basalt	Mativuhlungu	J Codron et al (2011; Oecologia)	194m	-25.1323	31.9096	0.0336321	0.320115	0.559412	0.0686267	0.0013625	0.000932234	0	0	0.0159197	311.739
JF0267	Faeces	Loxodonta africana	-26.3709	7.65924	57.7362	1.83555	31.4545	13.3931	May	2004	Dry	Kruger Park	South	Granite	Sabie River	J Codron et al (2011; Oecologia)	282m	-24.9349	31.7017	0.0371459	0.525636	0.00451775	0.432198	0	0	0	0.000501972	0	240.308
JF0268	Faeces	Loxodonta africana	-25.817	8.23437	59.9316	1.54667	38.7489	17.3274	May	2004	Dry	Kruger Park	South	Granite	Sabie River	J Codron et al (2011; Oecologia)	282m	-24.9349	31.7017	0.0371459	0.525636	0.00451775	0.432198	0	0	0	0.000501972	0	240.308
JF0269	Faeces	Loxodonta africana	-25.3908	7.83675	60.6913	1.39958	43.3638	20.3549	May	2004	Dry	Kruger Park	South	Granite	Sabie River	J Codron et al (2011; Oecologia)	282m	-24.9349	31.7017	0.0371459	0.525636	0.00451775	0.432198	0	0	0	0.000501972	0	240.308
JF0270	Faeces	Loxodonta africana	-26.7511	7.78335	49.6964	1.89902	26.1695	10.6919	May	2004	Dry	Kruger Park	South	Granite	Sabie River	J Codron et al (2011; Oecologia)	282m	-24.9349	31.7017	0.0371459	0.525636	0.00451775	0.432198	0	0	0	0.000501972	0	240.308
JF0271	Faeces	Loxodonta africana	-26.4097	7.01963	61.5293	1.42627	43.1399	13.1171	May	2004	Dry	Kruger Park	South	Granite	Sabie River	J Codron et al (2011; Oecologia)	282m	-24.9349	31.7017	0.0371459	0.525636	0.00451775	0.432198	0	0	0	0.000501972	0	240.308
JF0272	Faeces	Loxodonta africana	-25.4735	3.42916	44.4038	1.74973	25.3775	19.7676	June	2004	Dry	Kruger Park	South	Granite	Albasini Rd	J Codron et al (2011; Oecologia)	483m	-25.0479	31.27	0.00523335	0.302316	0.0470285	0.644204	0	0.000860277	0	0.000358449	0	273.059
JF0273	Faeces	Loxodonta africana	-25.0572	3.66653	42.7223	1.88969	22.6081	22.7249	June	2004	Dry	Kruger Park	South	Granite	Albasini Rd	J Codron et al (2011; Oecologia)	483m	-25.0479	31.27	0.00523335	0.302316	0.0470285	0.644204	0	0.000860277	0	0.000358449	0	273.059
JF0274	Faeces	Loxodonta africana	-25.3825	3.67196	44.9013	1.93826	23.1658	20.4141	June	2004	Dry	Kruger Park	South	Granite	Albasini Rd	J Codron et al (2011; Oecologia)	483m	-25.0479	31.27	0.00523335	0.302316	0.0470285	0.644204	0	0.000860277	0	0.000358449	0	273.059
JF0275	Faeces	Loxodonta africana	-25.533	3.84959	45.4232	2.02728	22.406	19.3451	June	2004	Dry	Kruger Park	South	Granite	Albasini Rd	J Codron et al (2011; Oecologia)	483m	-25.0479	31.27	0.00523335	0.302316	0.0470285	0.644204	0	0.000860277	0	0.000358449	0	273.059
JF0276	Faeces	Loxodonta africana	-26.6729	4.05205	47.1733	2.22838	21.1694	11.2478	June	2004	Dry	Kruger Park	South	Granite	Albasini Rd	J Codron et al (2011; Oecologia)	483m	-25.0479	31.27	0.00523335	0.302316	0.0470285	0.644204	0	0.000860277	0	0.000358449	0	273.059
JF0277	Faeces	Loxodonta africana	-27.2351	4.56246	46.1166	2.02123	22.8161	11.2119	June	2004	Dry	Kruger Park	South	Basalt	S29	J Codron et al (2011; Oecologia)	181m	-25.1342	31.9082	0.0275348	0.353793	0.549978	0.0662556	0.00129069	0.000645346	0	0	0.000501936	313.38
JF0278	Faeces	Loxodonta africana	-25.2978	3.76582	46.2904	1.75756	26.3379	24.2925	June	2004	Dry	Kruger Park	South	Basalt	S29	J Codron et al (2011; Oecologia)	181m	-25.1146	31.9309	0.132774	0.19977	0.52923	0.106807	0.00172154	0.00143462	0	0.000215193	0.0280468	296.966
JF0279	Faeces	Loxodonta africana	-25.8502	6.08826	46.6145	1.55208	30.0335	20.563	June	2004	Dry	Kruger Park	South	Basalt	S29	J Codron et al (2011; Oecologia)	181m	-25.0257	31.8797	0.0192073	0.260876	0.630474	0.0894431	0	0	0	0	0	333.118
JF0280	Faeces	Loxodonta africana	-25.5672	6.57385	46.6627	1.53527	30.3939	22.4734	June	2004	Dry	Kruger Park	South	Basalt	S29	J Codron et al (2011; Oecologia)	181m	-25.0217	31.8749	0.0192859	0.332377	0.564525	0.0838113	0	0	0	0	0	319.358
JF0281	Faeces	Loxodonta africana	-25.4312	1.48613	45.0451	1.89711	23.7441	23.3919	June	2004	Dry	Kruger Park	South	Basalt	S29	J Codron et al (2011; Oecologia)	181m	-25.0296	31.8938	0.00918155	0.0763934	0.87153	0.0428951	0	0	0	0	0	377.677
JF0282	Faeces	Loxodonta africana	-24.7294	5.73992	46.106	1.98866	23.1844	25.0536	June	2004	Dry	Kruger Park	South Central	Granite	N'watindlopfu	J Codron et al (2011; Oecologia)		-24.9027	31.7536	0.0666141	0.269611	0.059587	0.596157	0	0.00186433	0	0.00616664	0	263.265
JF0283	Faeces	Loxodonta africana	-23.3343	7.93133	42.4483	2.16958	19.5652	34.9637	June	2004	Dry	Kruger Park	South Central	Granite	Leeupan	J Codron et al (2011; Oecologia)		-24.8554	31.7959	0.0371513	0.0968228	0.661049	0.197303	0	0	0	0.0076741	0	346.69
JF0285	Faeces	Loxodonta africana	-24.0597	7.21148	43.7082	1.28423	34.0345	29.8108	June	2004	Dry	Kruger Park	South Central	Granite	Leeupan	J Codron et al (2011; Oecologia)		-24.8508	31.7984	0.0421596	0.12189	0.529576	0.293253	0	0.0001434	0	0.0129777	0	328.4
JF0286	Faeces	Loxodonta africana	-22.2205	6.5211	45.2375	1.72478	26.2279	42.8754	June	2004	Dry	Kruger Park	South Central	Granite	Leeupan	J Codron et al (2011; Oecologia)		-24.8379	31.8162	0.089045	0.270505	0.274735	0.338758	0	0.000215085	0	0.0267422	0	274.527
JF0287	Faeces	Loxodonta africana	-25.1329	6.29925	36.4462	1.9322	18.8625	25.4059	June	2004	Dry	Kruger Park	South Central	Basalt	Tshokwane	J Codron et al (2011; Oecologia)	258m	-24.7982	31.8794	0.028471	0.043101	0.586704	0.339788	0	0.000573723	0	0.00136259	0	348.085
JF0288	Faeces	Loxodonta africana	-24.7346	5.94553	43.1193	1.93029	22.3382	28.095	June	2004	Dry	Kruger Park	South Central	Basalt	Tshokwane	J Codron et al (2011; Oecologia)	258m	-24.7982	31.8794	0.028471	0.043101	0.586704	0.339788	0	0.000573723	0	0.00136259	0	348.085
JF0289	Faeces	Loxodonta africana	-24.3951	4.92353	45.169	1.9092	23.6585	30.3871	June	2004	Dry	Kruger Park	South Central	Basalt	Tshokwane	J Codron et al (2011; Oecologia)	258m	-24.7982	31.8794	0.028471	0.043101	0.586704	0.339788	0	0.000573723	0	0.00136259	0	348.085
JF0290	Faeces	Loxodonta africana	-24.4153	6.39228	42.8668	1.72594	24.8368	30.2508	June	2004	Dry	Kruger Park	South Central	Basalt	Tshokwane	J Codron et al (2011; Oecologia)	258m	-24.7982	31.8794	0.028471	0.043101	0.586704	0.339788	0	0.000573723	0	0.00136259	0	348.085
JF0291	Faeces	Loxodonta africana	-25.305	6.25271	43.8281	1.81483	24.15	24.2438	June	2004	Dry	Kruger Park	South Central	Basalt	Tshokwane	J Codron et al (2011; Oecologia)	258m	-24.7996	31.8761	0.0323529	0.0377331	0.624749	0.303156	0	0.000573888	0	0.00143472	0	351.628
JF0292	Faeces	Loxodonta africana	-23.0486	5.39013	47.6069	1.71552	27.7508	35.777	June	2004	Dry	Kruger Park	North Central	Granite	Masorini	J Codron et al (2011; Oecologia)	421m	-23.9201	31.2686	0.0025095	0.0967233	0.229583	0.656342	7.17e-05	0.0132645	0	0.0007887	0.000717	308.332
JF0293	Faeces	Loxodonta africana	-22.2455	4.95653	50.3848	1.57865	31.9163	41.3301	June	2004	Dry	Kruger Park	North Central	Granite	Masorini	J Codron et al (2011; Oecologia)	421m	-23.9201	31.2686	0.0025095	0.0967233	0.229583	0.656342	7.17e-05	0.0132645	0	0.0007887	0.000717	308.332
JF0294	Faeces	Loxodonta africana	-23.1487	5.75704	48.1467	1.81676	26.5014	35.0854	June	2004	Dry	Kruger Park	North Central	Granite	Masorini	J Codron et al (2011; Oecologia)	421m	-23.9201	31.2686	0.0025095	0.0967233	0.229583	0.656342	7.17e-05	0.0132645	0	0.0007887	0.000717	308.332
JF0295	Faeces	Loxodonta africana	-22.79	5.56079	45.6072	2.04597	22.2912	37.5651	June	2004	Dry	Kruger Park	North Central	Granite	Erfplaas	J Codron et al (2011; Oecologia)	414m	-23.9213	31.3037	0.00100358	0.135627	0.187025	0.654409	0	0.0206452	0	0.00129032	0	298.358
JF0296	Faeces	Loxodonta africana	-19.2523	4.80913	42.6974	1.16388	36.6854	62.0252	June	2004	Dry	Kruger Park	North Central	Granite	Erfplaas	J Codron et al (2011; Oecologia)	414m	-23.9213	31.3037	0.00100358	0.135627	0.187025	0.654409	0	0.0206452	0	0.00129032	0	298.358
JF0302	Faeces	Loxodonta africana	-24.5375	5.57457	49.5396	1.85562	26.697	23.2178	June	2004	Dry	Kruger Park	North Central	Basalt	Letaba	J Codron et al (2011; Oecologia)	266m	-23.8626	31.5591	0.11515	0.168925	0.269807	0.445114	7.17e-05	0.0005736	0	0.0002868	7.17e-05	286.757
JF0303	Faeces	Loxodonta africana	-23.6271	6.46603	47.7623	1.04705	45.616	30.044	June	2004	Dry	Kruger Park	North Central	Basalt	Letaba	J Codron et al (2011; Oecologia)	266m	-23.8626	31.5591	0.11515	0.168925	0.269807	0.445114	7.17e-05	0.0005736	0	0.0002868	7.17e-05	286.757
JF0304	Faeces	Loxodonta africana	-24.0786	6.52731	44.4154	1.96918	22.5553	26.6588	June	2004	Dry	Kruger Park	North Central	Basalt	Letaba	J Codron et al (2011; Oecologia)	266m	-23.8626	31.5591	0.11515	0.168925	0.269807	0.445114	7.17e-05	0.0005736	0	0.0002868	7.17e-05	286.757
JF0305	Faeces	Loxodonta africana	-24.0751	5.88808	46.2816	1.61792	28.6057	26.6847	June	2004	Dry	Kruger Park	North Central	Basalt	Letaba	J Codron et al (2011; Oecologia)	266m	-23.8626	31.5591	0.11515	0.168925	0.269807	0.445114	7.17e-05	0.0005736	0	0.0002868	7.17e-05	286.757
JF0306	Faeces	Loxodonta africana	-22.8333	5.67947	39.309	0.893481	43.9954	35.9968	June	2004	Dry	Kruger Park	North Central	Basalt	Letaba	J Codron et al (2011; Oecologia)	266m	-23.8626	31.5591	0.11515	0.168925	0.269807	0.445114	7.17e-05	0.0005736	0	0.0002868	7.17e-05	286.757
JF0332	Faeces	Loxodonta africana	-26.5305	6.11774	46.1794	1.49516	30.8859	12.2591	June	2004	Dry	Kruger Park	South	Granite	Maroela Loop	J Codron et al (2011; Oecologia)	255m	-24.9397	31.6699	0.158227	0.497418	0.0187921	0.254483	0	0.0136279	0	0.0542964	0.00315593	199.168
JF0333	Faeces	Loxodonta africana	-26.5809	5.87727	48.6638	1.69045	28.7875	11.9007	June	2004	Dry	Kruger Park	South	Granite	Maroela Loop	J Codron et al (2011; Oecologia)	255m	-24.9397	31.6699	0.158227	0.497418	0.0187921	0.254483	0	0.0136279	0	0.0542964	0.00315593	199.168
JF0334	Faeces	Loxodonta africana	-26.6035	6.22168	47.6246	1.51772	31.3791	11.7407	June	2004	Dry	Kruger Park	South	Granite	Maroela Loop	J Codron et al (2011; Oecologia)	255m	-24.9397	31.6699	0.158227	0.497418	0.0187921	0.254483	0	0.0136279	0	0.0542964	0.00315593	199.168
JF0335	Faeces	Loxodonta africana	-26.3322	5.9851	48.2338	1.75163	27.5365	13.6674	June	2004	Dry	Kruger Park	South	Granite	Maroela Loop	J Codron et al (2011; Oecologia)	255m	-24.9397	31.6699	0.158227	0.497418	0.0187921	0.254483	0	0.0136279	0	0.0542964	0.00315593	199.168
JF0336	Faeces	Loxodonta africana	-26.6305	7.91969	47.8738	1.96352	24.3816	11.5486	June	2004	Dry	Kruger Park	South	Granite	Maroela Loop	J Codron et al (2011; Oecologia)	255m	-24.9397	31.6699	0.158227	0.497418	0.0187921	0.254483	0	0.0136279	0	0.0542964	0.00315593	199.168
JF0337	Faeces	Loxodonta africana	-26.6665	2.1046	47.8526	2.00794	23.8317	15.0512	June	2004	Dry	Kruger Park	South	Basalt	Hlanganzwane	J Codron et al (2011; Oecologia)	238m	-25.2367	31.9857	0.0339214	0.180795	0.704317	0.0759466	0	0	0	0	0.00502008	344.062
JF0338	Faeces	Loxodonta africana	-24.6368	5.08836	44.9069	1.59661	28.1263	28.7555	June	2004	Dry	Kruger Park	South	Basalt	Hlanganzwane	J Codron et al (2011; Oecologia)	238m	-25.2367	31.9857	0.0339214	0.180795	0.704317	0.0759466	0	0	0	0	0.00502008	344.062
JF0339	Faeces	Loxodonta africana	-24.169	5.28286	46.6332	1.85684	25.1143	31.9141	June	2004	Dry	Kruger Park	South	Basalt	Hlanganzwane	J Codron et al (2011; Oecologia)	238m	-25.2367	31.9857	0.0339214	0.180795	0.704317	0.0759466	0	0	0	0	0.00502008	344.062
JF0340	Faeces	Loxodonta africana	-27.4205	5.64414	47.5385	1.89943	25.0278	9.96049	June	2004	Dry	Kruger Park	South	Basalt	Hlanganzwane	J Codron et al (2011; Oecologia)	238m	-25.2367	31.9857	0.0339214	0.180795	0.704317	0.0759466	0	0	0	0	0.00502008	344.062
JF0341	Faeces	Loxodonta africana	-24.6557	2.02065	45.1737	1.6548	27.2986	28.6276	June	2004	Dry	Kruger Park	South	Basalt	Hlanganzwane	J Codron et al (2011; Oecologia)	238m	-25.2367	31.9857	0.0339214	0.180795	0.704317	0.0759466	0	0	0	0	0.00502008	344.062
JF0349	Faeces	Loxodonta africana	-19.9402	4.66733	38.6303	2.0918	18.4675	50.5944	March	2004	Wet	Kruger Park	North Central	Basalt	Letaba	J Codron et al (2011; Oecologia)	266m	-23.8626	31.5591	0.11515	0.168925	0.269807	0.445114	7.17e-05	0.0005736	0	0.0002868	7.17e-05	286.757
JF0351	Faeces	Loxodonta africana	-25.4577	5.65055	41.0537	2.49584	16.4489	10.045	March	2004	Wet	Kruger Park	North Central	Basalt	Twisappel	J Codron et al (2011; Oecologia)		-23.7157	31.5418	0.00444317	0.0278773	0.62921	0.334958	0	0.00143328	0	0.00207826	0	358.191
JF0352	Faeces	Loxodonta africana	-18.3655	4.5885	45.4235	0.981507	46.2793	62.1677	March	2004	Wet	Kruger Park	North Central	Basalt	Twisappel	J Codron et al (2011; Oecologia)		-23.7157	31.5418	0.00444317	0.0278773	0.62921	0.334958	0	0.00143328	0	0.00207826	0	358.191
JF0364	Faeces	Loxodonta africana	-24.0209	1.70155	45.7751	2.06292	22.1895	20.6048	March	2004	Wet	Kruger Park	North Central	Basalt	Twisappel	J Codron et al (2011; Oecologia)		-23.7157	31.5418	0.00444317	0.0278773	0.62921	0.334958	0	0.00143328	0	0.00207826	0	358.191
JF0371	Faeces	Loxodonta africana	-22.7829	6.54509	43.2988	2.16915	19.9612	36.3747	April	2004	Dry	Kruger Park	North Central	Basalt	Letaba	J Codron et al (2011; Oecologia)	266m	-23.8626	31.5591	0.11515	0.168925	0.269807	0.445114	7.17e-05	0.0005736	0	0.0002868	7.17e-05	286.757
JF0372	Faeces	Loxodonta africana	-22.4697	6.22938	41.6429	2.57495	16.1723	38.7229	April	2004	Dry	Kruger Park	North Central	Basalt	Letaba	J Codron et al (2011; Oecologia)	266m	-23.8626	31.5591	0.11515	0.168925	0.269807	0.445114	7.17e-05	0.0005736	0	0.0002868	7.17e-05	286.757
JF0396	Faeces	Loxodonta africana	-20.1392	7.11927	44.2772	1.11162	39.8314	55.8934	July	2004	Dry	Kruger Park	North Central	Granite	Masorini	J Codron et al (2011; Oecologia)	421m	-23.9201	31.2686	0.0025095	0.0967233	0.229583	0.656342	7.17e-05	0.0132645	0	0.0007887	0.000717	308.332
JF0397	Faeces	Loxodonta africana	-23.0248	6.57837	46.3847	1.36044	34.0954	35.9419	July	2004	Dry	Kruger Park	North Central	Granite	Masorini	J Codron et al (2011; Oecologia)	421m	-23.9201	31.2686	0.0025095	0.0967233	0.229583	0.656342	7.17e-05	0.0132645	0	0.0007887	0.000717	308.332
JF0398	Faeces	Loxodonta africana	-24.1019	6.62458	50.9374	1.9703	25.8526	28.4947	July	2004	Dry	Kruger Park	North Central	Granite	Masorini	J Codron et al (2011; Oecologia)	421m	-23.9201	31.2686	0.0025095	0.0967233	0.229583	0.656342	7.17e-05	0.0132645	0	0.0007887	0.000717	308.332
JF0399	Faeces	Loxodonta africana	-24.1049	6.98705	50.9672	2.33772	21.8021	28.4738	July	2004	Dry	Kruger Park	North Central	Granite	Masorini	J Codron et al (2011; Oecologia)	421m	-23.9201	31.2686	0.0025095	0.0967233	0.229583	0.656342	7.17e-05	0.0132645	0	0.0007887	0.000717	308.332
JF0400	Faeces	Loxodonta africana	-21.4657	6.37601	46.047	1.29259	35.6239	46.7217	July	2004	Dry	Kruger Park	North Central	Granite	Masorini	J Codron et al (2011; Oecologia)	421m	-23.9201	31.2686	0.0025095	0.0967233	0.229583	0.656342	7.17e-05	0.0132645	0	0.0007887	0.000717	308.332
JF0401	Faeces	Loxodonta africana	-23.7264	6.96153	45.807	1.65303	27.711	31.0909	July	2004	Dry	Kruger Park	North Central	Granite	Masorini	J Codron et al (2011; Oecologia)	421m	-23.9201	31.2686	0.0025095	0.0967233	0.229583	0.656342	7.17e-05	0.0132645	0	0.0007887	0.000717	308.332
JF0402	Faeces	Loxodonta africana	-22.9218	4.58623	46.0627	1.38065	33.3632	36.654	July	2004	Dry	Kruger Park	North Central	Granite	Erfplaas	J Codron et al (2011; Oecologia)	414m	-23.9213	31.3037	0.00100358	0.135627	0.187025	0.654409	0	0.0206452	0	0.00129032	0	298.358
JF0403	Faeces	Loxodonta africana	-21.4223	7.65878	48.2968	1.69694	28.4611	46.5769	July	2004	Dry	Kruger Park	North Central	Basalt	Letaba	J Codron et al (2011; Oecologia)	266m	-23.8626	31.5591	0.11515	0.168925	0.269807	0.445114	7.17e-05	0.0005736	0	0.0002868	7.17e-05	286.757
JF0404	Faeces	Loxodonta africana	-23.5714	7.21123	45.3366	1.36048	33.3239	30.4616	July	2004	Dry	Kruger Park	North Central	Basalt	Letaba	J Codron et al (2011; Oecologia)	266m	-23.8626	31.5591	0.11515	0.168925	0.269807	0.445114	7.17e-05	0.0005736	0	0.0002868	7.17e-05	286.757
JF0405	Faeces	Loxodonta africana	-22.4985	6.64658	43.2309	1.72275	25.0941	38.5073	July	2004	Dry	Kruger Park	North Central	Basalt	Letaba	J Codron et al (2011; Oecologia)	266m	-23.8626	31.5591	0.11515	0.168925	0.269807	0.445114	7.17e-05	0.0005736	0	0.0002868	7.17e-05	286.757
JF0406	Faeces	Loxodonta africana	-22.7082	5.48148	46.6356	1.45648	32.0194	36.9347	July	2004	Dry	Kruger Park	North Central	Basalt	Letaba	J Codron et al (2011; Oecologia)	266m	-23.8626	31.5591	0.11515	0.168925	0.269807	0.445114	7.17e-05	0.0005736	0	0.0002868	7.17e-05	286.757
JF0407	Faeces	Loxodonta africana	-25.3737	8.32141	46.2151	1.59792	28.9221	16.9474	July	2004	Dry	Kruger Park	North Central	Basalt	Letaba	J Codron et al (2011; Oecologia)	266m	-23.8626	31.5591	0.11515	0.168925	0.269807	0.445114	7.17e-05	0.0005736	0	0.0002868	7.17e-05	286.757
JF0408	Faeces	Loxodonta africana	-24.3539	7.61357	47.134	1.32644	35.534	24.5943	July	2004	Dry	Kruger Park	North Central	Basalt	Letaba	J Codron et al (2011; Oecologia)	266m	-23.8626	31.5591	0.11515	0.168925	0.269807	0.445114	7.17e-05	0.0005736	0	0.0002868	7.17e-05	286.757
JF0409	Faeces	Loxodonta africana	-22.3646	7.17921	46.6228	1.04044	44.8106	39.5114	July	2004	Dry	Kruger Park	North Central	Basalt	Letaba Bridge	J Codron et al (2011; Oecologia)	232m	-23.8126	31.5825	0.0928781	0.185398	0.292548	0.323962	0	0.0314853	0	0.0698558	0.00387291	260.575
JF0410	Faeces	Loxodonta africana	-22.0046	7.01099	47.8801	1.87314	25.5614	42.2105	July	2004	Dry	Kruger Park	North Central	Basalt	Letaba Bridge	J Codron et al (2011; Oecologia)	232m	-23.8126	31.5825	0.0928781	0.185398	0.292548	0.323962	0	0.0314853	0	0.0698558	0.00387291	260.575
JF0411	Faeces	Loxodonta africana	-25.5492	6.69618	47.1398	1.70289	27.6823	15.6315	July	2004	Dry	Kruger Park	North Central	Basalt	Letaba Bridge	J Codron et al (2011; Oecologia)	232m	-23.8126	31.5825	0.0928781	0.185398	0.292548	0.323962	0	0.0314853	0	0.0698558	0.00387291	260.575
JF0412	Faeces	Loxodonta africana	-25.2023	7.62939	48.4532	1.7309	27.993	18.2325	July	2004	Dry	Kruger Park	North Central	Basalt	Letaba Bridge	J Codron et al (2011; Oecologia)	232m	-23.8126	31.5825	0.0928781	0.185398	0.292548	0.323962	0	0.0314853	0	0.0698558	0.00387291	260.575
JF0413	Faeces	Loxodonta africana	-24.1366	2.98546	37.524	0.8997	41.7073	29.2646	July	2004	Dry	Kruger Park	South Central	Granite	Mzandzeni	J Codron et al (2011; Oecologia)	368m	-24.4795	31.6313	0.00631005	0.382475	0.238993	0.35028	0	0.011186	0	0.0107558	0	277.807
JF0414	Faeces	Loxodonta africana	-24.0129	7.18962	45.2737	1.38219	32.755	30.1428	July	2004	Dry	Kruger Park	South Central	Granite	Mzandzeni	J Codron et al (2011; Oecologia)	368m	-24.4795	31.6313	0.00631005	0.382475	0.238993	0.35028	0	0.011186	0	0.0107558	0	277.807
JF0415	Faeces	Loxodonta africana	-25.3031	8.04188	46.5567	1.47214	31.6252	20.9781	July	2004	Dry	Kruger Park	South Central	Granite	Ngwenyeni	J Codron et al (2011; Oecologia)	329m	-24.6096	31.6691	0.0506992	0.409251	0.324489	0.201219	0	0.0101829	0	0.0041592	0	277.081
JF0416	Faeces	Loxodonta africana	-25.1833	7.05061	43.7311	1.52037	28.7635	21.8294	July	2004	Dry	Kruger Park	South Central	Granite	Ngwenyeni	J Codron et al (2011; Oecologia)	329m	-24.6096	31.6691	0.0506992	0.409251	0.324489	0.201219	0	0.0101829	0	0.0041592	0	277.081
JF0417	Faeces	Loxodonta africana	-24.6169	7.95735	46.3668	1.50071	30.8965	25.8522	July	2004	Dry	Kruger Park	South Central	Granite	Ngwenyeni	J Codron et al (2011; Oecologia)	329m	-24.6096	31.6691	0.0506992	0.409251	0.324489	0.201219	0	0.0101829	0	0.0041592	0	277.081
JF0418	Faeces	Loxodonta africana	-25.1578	6.35406	45.2705	1.17663	38.4746	22.0099	July	2004	Dry	Kruger Park	South Central	Granite	Ngwenyeni	J Codron et al (2011; Oecologia)	329m	-24.6096	31.6691	0.0506992	0.409251	0.324489	0.201219	0	0.0101829	0	0.0041592	0	277.081
JF0419	Faeces	Loxodonta africana	-24.578	7.9734	46.1398	1.40618	32.8122	26.1286	July	2004	Dry	Kruger Park	South Central	Granite	Ngwenyeni	J Codron et al (2011; Oecologia)	329m	-24.6096	31.6691	0.0506992	0.409251	0.324489	0.201219	0	0.0101829	0	0.0041592	0	277.081
JF0420	Faeces	Loxodonta africana	-24.758	6.9397	46.154	1.73887	26.5425	24.8503	July	2004	Dry	Kruger Park	South Central	Granite	Ngwenyeni	J Codron et al (2011; Oecologia)	329m	-24.6096	31.6691	0.0506992	0.409251	0.324489	0.201219	0	0.0101829	0	0.0041592	0	277.081
JF0421	Faeces	Loxodonta africana	-25.3527	8.21127	51.417	1.83196	28.0666	20.626	July	2004	Dry	Kruger Park	South Central	Granite	Ngwenyeni	J Codron et al (2011; Oecologia)	329m	-24.6096	31.6691	0.0506992	0.409251	0.324489	0.201219	0	0.0101829	0	0.0041592	0	277.081
JF0422	Faeces	Loxodonta africana	-25.7345	7.1574	47.9653	2.20684	21.7348	17.9137	July	2004	Dry	Kruger Park	South Central	Granite	Ngwenyeni	J Codron et al (2011; Oecologia)	329m	-24.6096	31.6691	0.0506992	0.409251	0.324489	0.201219	0	0.0101829	0	0.0041592	0	277.081
JF0423	Faeces	Loxodonta africana	-25.7092	4.96931	48.9385	1.17625	41.6055	21.515	July	2004	Dry	Kruger Park	South Central	Basalt	Satara	J Codron et al (2011; Oecologia)	266m	-24.6193	31.7938	0.00566471	0.154166	0.515775	0.309838	0	0.0100387	0	0.00451742	0	330.661
JF0424	Faeces	Loxodonta africana	-23.1281	7.91766	47.9081	1.43043	33.4921	38.9414	July	2004	Dry	Kruger Park	South Central	Basalt	N'wanetsi Bridge	J Codron et al (2011; Oecologia)	259m	-24.4196	31.7835	0.0329986	0.0433286	0.804591	0.116428	0	0.00172166	0	0.000932568	0	368.73
JF0425	Faeces	Loxodonta africana	-23.7895	7.00641	43.5343	1.43481	30.3415	34.4759	July	2004	Dry	Kruger Park	South Central	Basalt	N'wanetsi Bridge	J Codron et al (2011; Oecologia)	259m	-24.4196	31.7835	0.0329986	0.0433286	0.804591	0.116428	0	0.00172166	0	0.000932568	0	368.73
JF0426	Faeces	Loxodonta africana	-24.1323	7.23061	48.1955	1.957	24.6273	32.1615	July	2004	Dry	Kruger Park	South Central	Basalt	N'wanetsi Bridge	J Codron et al (2011; Oecologia)	259m	-24.4196	31.7835	0.0329986	0.0433286	0.804591	0.116428	0	0.00172166	0	0.000932568	0	368.73
JF0427	Faeces	Loxodonta africana	-24.7495	7.12028	44.2735	1.35609	32.648	27.9945	July	2004	Dry	Kruger Park	South Central	Basalt	Sweni	J Codron et al (2011; Oecologia)	262m	-24.4331	31.788	0.0314114	0.0496271	0.767714	0.147232	0	0.00222318	0	0.00179289	0	364.322
JF0428	Faeces	Loxodonta africana	-24.1225	3.44874	42.2837	1.21111	34.9131	32.2276	July	2004	Dry	Kruger Park	South Central	Basalt	N'wanetsi Bridge	J Codron et al (2011; Oecologia)	259m	-24.4196	31.7835	0.0329986	0.0433286	0.804591	0.116428	0	0.00172166	0	0.000932568	0	368.73
JF0429	Faeces	Loxodonta africana	-25.408	7.26164	44.7149	1.47772	30.2593	23.5484	July	2004	Dry	Kruger Park	South Central	Basalt	Sweni	J Codron et al (2011; Oecologia)	262m	-24.4331	31.788	0.0314114	0.0496271	0.767714	0.147232	0	0.00222318	0	0.00179289	0	364.322
JF0430	Faeces	Loxodonta africana	-25.978	3.39578	45.5134	1.392	32.6963	19.6996	July	2004	Dry	Kruger Park	South Central	Basalt	Satara	J Codron et al (2011; Oecologia)	266m	-24.6193	31.7938	0.00566471	0.154166	0.515775	0.309838	0	0.0100387	0	0.00451742	0	330.661
JF0431	Faeces	Loxodonta africana	-25.1508	7.08639	43.4483	1.43194	30.3423	25.285	July	2004	Dry	Kruger Park	South Central	Basalt	Satara	J Codron et al (2011; Oecologia)	266m	-24.6193	31.7938	0.00566471	0.154166	0.515775	0.309838	0	0.0100387	0	0.00451742	0	330.661
JF0432	Faeces	Loxodonta africana	-25.5086	7.47676	46.1107	0.979774	47.0626	22.869	July	2004	Dry	Kruger Park	South Central	Basalt	Satara	J Codron et al (2011; Oecologia)	266m	-24.6193	31.7938	0.00566471	0.154166	0.515775	0.309838	0	0.0100387	0	0.00451742	0	330.661
JF0433	Faeces	Loxodonta africana	-25.1286	7.81295	46.1299	1.26615	36.4332	22.2175	July	2004	Dry	Kruger Park	South	Granite	Sabie River	J Codron et al (2011; Oecologia)	282m	-24.9349	31.7017	0.0371459	0.525636	0.00451775	0.432198	0	0	0	0.000501972	0	240.308
JF0434	Faeces	Loxodonta africana	-23.9138	5.9808	44.4984	1.14794	38.7636	30.8471	July	2004	Dry	Kruger Park	South	Granite	Sabie River	J Codron et al (2011; Oecologia)	282m	-24.9349	31.7017	0.0371459	0.525636	0.00451775	0.432198	0	0	0	0.000501972	0	240.308
JF0435	Faeces	Loxodonta africana	-25.9009	7.51266	46.3662	1.33893	34.6293	16.7313	July	2004	Dry	Kruger Park	South	Granite	Sabie River	J Codron et al (2011; Oecologia)	282m	-24.9349	31.7017	0.0371459	0.525636	0.00451775	0.432198	0	0	0	0.000501972	0	240.308
JF0436	Faeces	Loxodonta africana	-26.3435	8.54324	45.8826	1.36421	33.6332	13.5876	July	2004	Dry	Kruger Park	South	Granite	Sabie River	J Codron et al (2011; Oecologia)	282m	-24.9349	31.7017	0.0371459	0.525636	0.00451775	0.432198	0	0	0	0.000501972	0	240.308
JF0437	Faeces	Loxodonta africana	-25.6669	8.54225	48.7074	1.53288	31.775	18.3936	July	2004	Dry	Kruger Park	South	Granite	Sabie River	J Codron et al (2011; Oecologia)	282m	-24.9349	31.7017	0.0371459	0.525636	0.00451775	0.432198	0	0	0	0.000501972	0	240.308
JF0438	Faeces	Loxodonta africana	-25.5291	8.54839	50.1006	1.37349	36.4769	19.3727	July	2004	Dry	Kruger Park	South	Granite	Sabie River	J Codron et al (2011; Oecologia)	282m	-24.9349	31.7017	0.0371459	0.525636	0.00451775	0.432198	0	0	0	0.000501972	0	240.308
JF0439	Faeces	Loxodonta africana	-26.0582	7.94729	48.2203	1.73186	27.843	15.6144	July	2004	Dry	Kruger Park	South	Granite	H1-1 Skukuza	J Codron et al (2011; Oecologia)	305m	-25.0129	31.5889	0.106618	0.623073	0.020076	0.231161	0	0.0121173	0	0.0069549	0	212.655
JF0440	Faeces	Loxodonta africana	-26.216	8.76301	46.3526	1.77676	26.0883	14.4929	July	2004	Dry	Kruger Park	South	Granite	H1-1 Skukuza	J Codron et al (2011; Oecologia)	305m	-25.0129	31.5889	0.106618	0.623073	0.020076	0.231161	0	0.0121173	0	0.0069549	0	212.655
JF0441	Faeces	Loxodonta africana	-25.7998	6.35592	48.3402	1.86266	25.9522	17.4494	July	2004	Dry	Kruger Park	South	Granite	H1-1 Skukuza	J Codron et al (2011; Oecologia)	305m	-25.0129	31.5889	0.106618	0.623073	0.020076	0.231161	0	0.0121173	0	0.0069549	0	212.655
JF0442	Faeces	Loxodonta africana	-26.9899	5.19446	46.6349	1.71758	27.1516	8.99582	July	2004	Dry	Kruger Park	South	Granite	De Laporte	J Codron et al (2011; Oecologia)	308m	-25.0516	31.5755	0.0692054	0.607788	0.0441767	0.275459	0	0.0027969	0	0.000573723	0	228.787
JF0443	Faeces	Loxodonta africana	-24.5168	6.93034	47.6849	1.3823	34.4969	29.5657	July	2004	Dry	Kruger Park	South	Basalt	Lower Sabie	J Codron et al (2011; Oecologia)		-25.0938	31.9128	0.0367157	0.21384	0.654213	0.0875583	0	0.0041592	0	0.000717103	0.0027967	334.392
JF0444	Faeces	Loxodonta africana	-26.1412	4.47625	49.4748	1.94697	25.4112	18.5977	July	2004	Dry	Kruger Park	South	Basalt	Lower Sabie	J Codron et al (2011; Oecologia)		-25.0938	31.9128	0.0367157	0.21384	0.654213	0.0875583	0	0.0041592	0	0.000717103	0.0027967	334.392
JF0445	Faeces	Loxodonta africana	-25.744	6.74775	43.8821	1.67143	26.2543	21.2799	July	2004	Dry	Kruger Park	South	Basalt	Lower Sabie	J Codron et al (2011; Oecologia)		-25.0938	31.9128	0.0367157	0.21384	0.654213	0.0875583	0	0.0041592	0	0.000717103	0.0027967	334.392
JF0446	Faeces	Loxodonta africana	-26.6334	6.53453	47.3015	1.74262	27.1439	15.2747	July	2004	Dry	Kruger Park	South	Basalt	Lower Sabie	J Codron et al (2011; Oecologia)		-25.0938	31.9128	0.0367157	0.21384	0.654213	0.0875583	0	0.0041592	0	0.000717103	0.0027967	334.392
JF0447	Faeces	Loxodonta africana	-25.9293	7.41171	45.6524	1.63627	27.9003	20.0283	July	2004	Dry	Kruger Park	South	Basalt	Lower Sabie	J Codron et al (2011; Oecologia)		-25.0938	31.9128	0.0367157	0.21384	0.654213	0.0875583	0	0.0041592	0	0.000717103	0.0027967	334.392
JF0448	Faeces	Loxodonta africana	-26.4253	7.33533	46.5064	1.85041	25.133	16.6797	July	2004	Dry	Kruger Park	South	Basalt	Duke	J Codron et al (2011; Oecologia)	248m	-25.208	31.8907	0.154414	0.558632	0.23761	0.0492003	0	0.000143441	0	0	0	236.972
JF0449	Faeces	Loxodonta africana	-25.8339	7.59048	49.55	1.55919	31.7794	20.673	July	2004	Dry	Kruger Park	South	Basalt	Duke	J Codron et al (2011; Oecologia)	248m	-25.208	31.8907	0.154414	0.558632	0.23761	0.0492003	0	0.000143441	0	0	0	236.972
JF0450	Faeces	Loxodonta africana	-25.3709	4.83859	48.6607	1.61233	30.1803	23.7986	July	2004	Dry	Kruger Park	South	Basalt	Duke	J Codron et al (2011; Oecologia)	248m	-25.208	31.8907	0.154414	0.558632	0.23761	0.0492003	0	0.000143441	0	0	0	236.972
JF0451	Faeces	Loxodonta africana	-26.0569	5.30487	48.2294	1.96872	24.4978	19.1674	July	2004	Dry	Kruger Park	South	Basalt	Hlanganzwane	J Codron et al (2011; Oecologia)	238m	-25.2367	31.9857	0.0339214	0.180795	0.704317	0.0759466	0	0	0	0	0.00502008	344.062
JF0452	Faeces	Loxodonta africana	-25.6528	5.05735	46.6951	1.63907	28.4889	21.8956	July	2004	Dry	Kruger Park	South	Basalt	Hlanganzwane	J Codron et al (2011; Oecologia)	238m	-25.2367	31.9857	0.0339214	0.180795	0.704317	0.0759466	0	0	0	0	0.00502008	344.062
JF0453	Faeces	Loxodonta africana	-25.6316	1.69448	47.2275	1.28444	36.769	18.6447	August	2004	Dry	Kruger Park	South	Granite	Fayi Loop	J Codron et al (2011; Oecologia)	634m	-25.1674	31.2501	0.229247	0.562437	0.0133333	0.19319	0.000573477	0.00078853	7.16846e-05	0.000143369	0.000215054	198.703
JF0454	Faeces	Loxodonta africana	-25.7381	1.78795	46.757	1.40085	33.3777	17.8876	August	2004	Dry	Kruger Park	South	Granite	Fayi Loop	J Codron et al (2011; Oecologia)	634m	-25.1674	31.2501	0.229247	0.562437	0.0133333	0.19319	0.000573477	0.00078853	7.16846e-05	0.000143369	0.000215054	198.703
JF0455	Faeces	Loxodonta africana	-26.4923	4.12263	46.519	1.64062	28.3546	12.5303	August	2004	Dry	Kruger Park	South	Granite	Fayi Loop	J Codron et al (2011; Oecologia)	634m	-25.1674	31.2501	0.229247	0.562437	0.0133333	0.19319	0.000573477	0.00078853	7.16846e-05	0.000143369	0.000215054	198.703
JF0456	Faeces	Loxodonta africana	-25.9162	2.97433	45.4961	1.5518	29.3182	16.6226	August	2004	Dry	Kruger Park	South	Granite	Fayi Loop	J Codron et al (2011; Oecologia)	634m	-25.1674	31.2501	0.229247	0.562437	0.0133333	0.19319	0.000573477	0.00078853	7.16846e-05	0.000143369	0.000215054	198.703
JF0457	Faeces	Loxodonta africana	-25.2336	1.87668	45.8656	1.47172	31.1645	21.4716	August	2004	Dry	Kruger Park	South	Granite	Mestel Dam	J Codron et al (2011; Oecologia)	516m	-25.0232	31.2147	0.0988247	0.181812	0.136735	0.521786	0.00494482	0.0200659	0.000286656	0.0240791	0.0114662	257.475
JF0458	Faeces	Loxodonta africana	-24.9396	2.83586	44.663	1.12414	39.731	23.5601	August	2004	Dry	Kruger Park	South	Granite	Albasini Rd	J Codron et al (2011; Oecologia)	483m	-25.0479	31.27	0.00523335	0.302316	0.0470285	0.644204	0	0.000860277	0	0.000358449	0	273.059
JF0459	Faeces	Loxodonta africana	-25.3668	3.30076	46.4164	1.133	40.9678	20.5252	August	2004	Dry	Kruger Park	South	Granite	Albasini Rd	J Codron et al (2011; Oecologia)	483m	-25.0479	31.27	0.00523335	0.302316	0.0470285	0.644204	0	0.000860277	0	0.000358449	0	273.059
JF0460	Faeces	Loxodonta africana	-25.3309	2.85314	46.8308	0.955768	48.998	20.7808	August	2004	Dry	Kruger Park	South	Granite	Albasini Rd	J Codron et al (2011; Oecologia)	483m	-25.0479	31.27	0.00523335	0.302316	0.0470285	0.644204	0	0.000860277	0	0.000358449	0	273.059
JF0461	Faeces	Loxodonta africana	-25.8553	3.85068	45.5454	1.33152	34.2056	17.0556	August	2004	Dry	Kruger Park	South	Granite	Albasini Rd	J Codron et al (2011; Oecologia)	483m	-25.0479	31.27	0.00523335	0.302316	0.0470285	0.644204	0	0.000860277	0	0.000358449	0	273.059
JF0462	Faeces	Loxodonta africana	-24.1045	4.49698	45.7775	1.55429	29.4523	29.4921	August	2004	Dry	Kruger Park	South	Granite	Doispane Rd	J Codron et al (2011; Oecologia)	326m	-25.0021	31.4834	0.0262516	0.526539	0.213599	0.224573	0	0.00580978	0	0.00208005	0.00114761	260.745
JF0463	Faeces	Loxodonta africana	-26.0268	4.55935	44.5997	1.60932	27.7134	19.3705	August	2004	Dry	Kruger Park	South	Basalt	Sunset Dam	J Codron et al (2011; Oecologia)	175m	-25.1166	31.9126	0.117558	0.309353	0.458973	0.0836322	0.00179314	0.00451872	0	0.000645531	0.023526	282.305
JF0464	Faeces	Loxodonta africana	-26.7067	4.8643	43.7351	1.73553	25.1999	14.7796	August	2004	Dry	Kruger Park	South	Basalt	Sunset Dam	J Codron et al (2011; Oecologia)	175m	-25.1166	31.9126	0.117558	0.309353	0.458973	0.0836322	0.00179314	0.00451872	0	0.000645531	0.023526	282.305
JF0465	Faeces	Loxodonta africana	-26.7067	3.82244	45.1591	1.66591	27.1077	14.7796	August	2004	Dry	Kruger Park	South	Basalt	Mativuhlungu	J Codron et al (2011; Oecologia)	194m	-25.1323	31.9096	0.0336321	0.320115	0.559412	0.0686267	0.0013625	0.000932234	0	0	0.0159197	311.739
JF0466	Faeces	Loxodonta africana	-26.3143	5.45703	46.1014	1.52986	30.1343	17.429	August	2004	Dry	Kruger Park	South	Basalt	Mativuhlungu	J Codron et al (2011; Oecologia)	194m	-25.1323	31.9096	0.0336321	0.320115	0.559412	0.0686267	0.0013625	0.000932234	0	0	0.0159197	311.739
JF0467	Faeces	Loxodonta africana	-26.6013	3.81859	47.6805	1.22591	38.8941	15.4916	August	2004	Dry	Kruger Park	South	Basalt	Mativuhlungu	J Codron et al (2011; Oecologia)	194m	-25.1323	31.9096	0.0336321	0.320115	0.559412	0.0686267	0.0013625	0.000932234	0	0	0.0159197	311.739
JF0468	Faeces	Loxodonta africana	-26.867	5.7378	45.447	1.45971	31.1343	13.6974	August	2004	Dry	Kruger Park	South	Basalt	Mativuhlungu	J Codron et al (2011; Oecologia)	194m	-25.1323	31.9096	0.0336321	0.320115	0.559412	0.0686267	0.0013625	0.000932234	0	0	0.0159197	311.739
JF0469	Faeces	Loxodonta africana	-25.7388	6.18611	44.3404	1.69195	26.2066	21.315	August	2004	Dry	Kruger Park	South	Basalt	Mativuhlungu	J Codron et al (2011; Oecologia)	194m	-25.1323	31.9096	0.0336321	0.320115	0.559412	0.0686267	0.0013625	0.000932234	0	0	0.0159197	311.739
JF0470	Faeces	Loxodonta africana	-25.2459	4.96306	45.2525	1.44449	31.3276	24.6429	August	2004	Dry	Kruger Park	South	Basalt	Mativuhlungu	J Codron et al (2011; Oecologia)	194m	-25.1323	31.9096	0.0336321	0.320115	0.559412	0.0686267	0.0013625	0.000932234	0	0	0.0159197	311.739
JF0471	Faeces	Loxodonta africana	-24.0862	7.1329	45.7373	1.54496	29.6042	32.4726	August	2004	Dry	Kruger Park	South	Basalt	Mativuhlungu	J Codron et al (2011; Oecologia)	194m	-25.1323	31.9096	0.0336321	0.320115	0.559412	0.0686267	0.0013625	0.000932234	0	0	0.0159197	311.739
JF0472	Faeces	Loxodonta africana	-26.0888	4.85014	43.6446	1.55838	28.0065	18.9521	August	2004	Dry	Kruger Park	South	Basalt	Gomondwane	J Codron et al (2011; Oecologia)		-25.2381	31.8504	0.338904	0.569287	0.0315593	0.0587434	0	0.00136279	0	0.000143451	0	177.995
JF0483	Faeces	Loxodonta africana	-22.4066	5.67708	43.6284	1.32401	32.9517	40.2158	August	2004	Dry	Kruger Park	North Central	Granite	Letaba Bridge 2	J Codron et al (2011; Oecologia)	264m	-23.7597	31.3709	0.0436778	0.0892921	0.0488417	0.765259	0	0.0242416	0	0.0254608	0.00322743	271.34
JF0484	Faeces	Loxodonta africana	-21.2767	6.3039	43	0.772426	55.6688	48.0281	August	2004	Dry	Kruger Park	North Central	Granite	Letaba Bridge 2	J Codron et al (2011; Oecologia)	264m	-23.7597	31.3709	0.0436778	0.0892921	0.0488417	0.765259	0	0.0242416	0	0.0254608	0.00322743	271.34
JF0485	Faeces	Loxodonta africana	-21.9153	5.70699	40.8801	1.23073	33.2161	43.613	August	2004	Dry	Kruger Park	North Central	Granite	Letaba Bridge 2	J Codron et al (2011; Oecologia)	264m	-23.7597	31.3709	0.0436778	0.0892921	0.0488417	0.765259	0	0.0242416	0	0.0254608	0.00322743	271.34
JF0486	Faeces	Loxodonta africana	-23.0522	5.03097	48.489	1.18498	40.9197	35.752	August	2004	Dry	Kruger Park	North Central	Granite	H14/S133	J Codron et al (2011; Oecologia)	294m	-23.7834	31.3597	0.0202911	0.0684018	0.0270309	0.87897	0	0.0019359	0	0.0033699	0	290.213
JF0487	Faeces	Loxodonta africana	-24.1168	5.96175	45.6493	1.41097	32.3532	28.3916	August	2004	Dry	Kruger Park	North Central	Granite	H14/S133	J Codron et al (2011; Oecologia)	294m	-23.7834	31.3597	0.0202911	0.0684018	0.0270309	0.87897	0	0.0019359	0	0.0033699	0	290.213
JF0488	Faeces	Loxodonta africana	-23.8019	5.68966	50.702	1.12731	44.976	30.5686	August	2004	Dry	Kruger Park	North Central	Granite	Ngwenyeni Bridge	J Codron et al (2011; Oecologia)	291m	-23.7824	31.3542	0.0223736	0.0630333	0.0337038	0.871423	0	0.00236644	0	0.00709932	0	289.753
JF0489	Faeces	Loxodonta africana	-24.4398	5.8463	46.5807	1.54222	30.2036	26.158	August	2004	Dry	Kruger Park	North Central	Granite	Ngwenyeni Bridge	J Codron et al (2011; Oecologia)	291m	-23.7824	31.3542	0.0223736	0.0630333	0.0337038	0.871423	0	0.00236644	0	0.00709932	0	289.753
JF0493	Faeces	Loxodonta africana	-21.0431	5.321	43.9549	1.17511	37.4049	49.4203	August	2004	Dry	Kruger Park	North Central	Basalt	S46/S94	J Codron et al (2011; Oecologia)	255m	-23.9171	31.6305	0.0156306	0.0409407	0.240912	0.702517	0	0	0	0	0	316.871
JF0494	Faeces	Loxodonta africana	-24.365	6.48847	44.6406	1.48553	30.0504	24.5113	August	2004	Dry	Kruger Park	North Central	Basalt	Engelhard	J Codron et al (2011; Oecologia)	215m	-23.8351	31.6377	0.196257	0.141833	0.339954	0.249104	0.00129069	0.0157751	0	0.0027965	0.0529901	258.705
JF0495	Faeces	Loxodonta africana	-23.4625	6.28744	45.3177	1.33595	33.9217	31.2783	August	2004	Dry	Kruger Park	North Central	Basalt	Letaba	J Codron et al (2011; Oecologia)	266m	-23.8626	31.5591	0.11515	0.168925	0.269807	0.445114	7.17e-05	0.0005736	0	0.0002868	7.17e-05	286.757
JF0496	Faeces	Loxodonta africana	-24.7871	5.86806	43.0203	1.60316	26.8346	21.346	August	2004	Dry	Kruger Park	North Central	Basalt	Letaba	J Codron et al (2011; Oecologia)	266m	-23.8626	31.5591	0.11515	0.168925	0.269807	0.445114	7.17e-05	0.0005736	0	0.0002868	7.17e-05	286.757
JF0497	Faeces	Loxodonta africana	-22.9684	5.09749	44.6529	0.936897	47.6604	34.9835	August	2004	Dry	Kruger Park	North Central	Basalt	Letaba	J Codron et al (2011; Oecologia)	266m	-23.8626	31.5591	0.11515	0.168925	0.269807	0.445114	7.17e-05	0.0005736	0	0.0002868	7.17e-05	286.757
JF0498	Faeces	Loxodonta africana	-23.8353	5.63011	45.8824	1.31798	34.8128	28.4833	August	2004	Dry	Kruger Park	North Central	Basalt	Letaba	J Codron et al (2011; Oecologia)	266m	-23.8626	31.5591	0.11515	0.168925	0.269807	0.445114	7.17e-05	0.0005736	0	0.0002868	7.17e-05	286.757
JF0499	Faeces	Loxodonta africana	-23.2644	6.3837	43.6696	1.53625	28.4261	32.7641	August	2004	Dry	Kruger Park	North Central	Basalt	Letaba	J Codron et al (2011; Oecologia)	266m	-23.8626	31.5591	0.11515	0.168925	0.269807	0.445114	7.17e-05	0.0005736	0	0.0002868	7.17e-05	286.757
JF0500	Faeces	Loxodonta africana	-22.3599	5.83288	43.2496	1.66454	25.9829	39.5467	August	2004	Dry	Kruger Park	North Central	Basalt	Letaba	J Codron et al (2011; Oecologia)	266m	-23.8626	31.5591	0.11515	0.168925	0.269807	0.445114	7.17e-05	0.0005736	0	0.0002868	7.17e-05	286.757
JF0501	Faeces	Loxodonta africana	-23.7703	5.99518	48.4351	1.24809	38.8074	28.9703	August	2004	Dry	Kruger Park	North Central	Basalt	Letaba	J Codron et al (2011; Oecologia)	266m	-23.8626	31.5591	0.11515	0.168925	0.269807	0.445114	7.17e-05	0.0005736	0	0.0002868	7.17e-05	286.757
JF0502	Faeces	Loxodonta africana	-21.342	6.27643	45.9936	1.0806	42.563	47.1792	August	2004	Dry	Kruger Park	North Central	Basalt	Letaba Bridge	J Codron et al (2011; Oecologia)	232m	-23.8126	31.5825	0.0928781	0.185398	0.292548	0.323962	0	0.0314853	0	0.0698558	0.00387291	260.575
JF0513	Faeces	Loxodonta africana	-24.3011	5.33358	46.2104	1.47401	31.3501	28.0959	August	2004	Dry	Kruger Park	South Central	Granite	Mantimahle	J Codron et al (2011; Oecologia)	287m	-24.8998	31.7372	0.0611426	0.273457	0.121067	0.538886	0	0.00157695	0	0.00387069	0	270.898
JF0514	Faeces	Loxodonta africana	-23.7923	4.91109	44.5067	1.37675	32.3273	31.71	August	2004	Dry	Kruger Park	South Central	Granite	Mantimahle	J Codron et al (2011; Oecologia)	287m	-24.8998	31.7372	0.0611426	0.273457	0.121067	0.538886	0	0.00157695	0	0.00387069	0	270.898
JF0515	Faeces	Loxodonta africana	-23.4392	5.21513	45.0313	1.62358	27.7358	34.2181	August	2004	Dry	Kruger Park	South Central	Granite	Mantimahle	J Codron et al (2011; Oecologia)	287m	-24.8998	31.7372	0.0611426	0.273457	0.121067	0.538886	0	0.00157695	0	0.00387069	0	270.898
JF0516	Faeces	Loxodonta africana	-22.8766	6.71863	44.6207	1.68139	26.538	38.2147	August	2004	Dry	Kruger Park	South Central	Granite	N'watindlopfu	J Codron et al (2011; Oecologia)		-24.9027	31.7536	0.0666141	0.269611	0.059587	0.596157	0	0.00186433	0	0.00616664	0	263.265
JF0517	Faeces	Loxodonta africana	-24.6764	6.49626	45.6256	1.63191	27.9584	25.4296	August	2004	Dry	Kruger Park	South Central	Granite	Kruger Memorial Tablets	J Codron et al (2011; Oecologia)		-24.8298	31.8331	0.0479265	0.177931	0.523246	0.245659	0	0.000358732	0	0.00373081	0.00114794	323.375
JF0518	Faeces	Loxodonta africana	-25.5052	5.42275	45.2134	1.6425	27.5272	19.5426	August	2004	Dry	Kruger Park	South Central	Granite	Mhisanamond	J Codron et al (2011; Oecologia)	311m	-24.6126	31.7111	0.0461031	0.395927	0.0818814	0.452069	0	0.0098946	0	0.0141249	0	252.169
JF0519	Faeces	Loxodonta africana	-24.2909	6.43959	44.9786	1.71718	26.1934	28.1685	August	2004	Dry	Kruger Park	South Central	Granite	Mhisanamond	J Codron et al (2011; Oecologia)	311m	-24.6126	31.7111	0.0461031	0.395927	0.0818814	0.452069	0	0.0098946	0	0.0141249	0	252.169
JF0520	Faeces	Loxodonta africana	-26.062	7.41164	42.9979	1.92568	22.3287	15.5871	August	2004	Dry	Kruger Park	South Central	Granite	Mhisanamond	J Codron et al (2011; Oecologia)	311m	-24.6126	31.7111	0.0461031	0.395927	0.0818814	0.452069	0	0.0098946	0	0.0141249	0	252.169
JF0521	Faeces	Loxodonta africana	-25.3378	6.36245	44.4858	1.28621	34.5868	20.7314	August	2004	Dry	Kruger Park	South Central	Granite	Mhisanamond	J Codron et al (2011; Oecologia)	311m	-24.6126	31.7111	0.0461031	0.395927	0.0818814	0.452069	0	0.0098946	0	0.0141249	0	252.169
JF0522	Faeces	Loxodonta africana	-26.0997	7.95793	48.3463	1.29905	37.2167	15.3191	August	2004	Dry	Kruger Park	South Central	Granite	Mhisanamond	J Codron et al (2011; Oecologia)	311m	-24.6126	31.7111	0.0461031	0.395927	0.0818814	0.452069	0	0.0098946	0	0.0141249	0	252.169
JF0523	Faeces	Loxodonta africana	-25.6784	5.7084	48.3486	1.04851	46.1115	21.7226	August	2004	Dry	Kruger Park	South Central	Basalt	Tshokwane	J Codron et al (2011; Oecologia)	258m	-24.7996	31.8761	0.0323529	0.0377331	0.624749	0.303156	0	0.000573888	0	0.00143472	0	351.628
JF0524	Faeces	Loxodonta africana	-22.6692	7.8412	44.9264	1.6193	27.7443	42.0403	August	2004	Dry	Kruger Park	South Central	Basalt	Mazithi	J Codron et al (2011; Oecologia)	265m	-24.7217	31.8356	0.00616841	0.0373691	0.476331	0.461627	0	0.011763	0	0.00659877	0.000143451	337.111
JF0525	Faeces	Loxodonta africana	-22.583	7.67472	50.1476	1.69347	29.6123	42.6222	August	2004	Dry	Kruger Park	South Central	Basalt	Mazithi	J Codron et al (2011; Oecologia)	265m	-24.7217	31.8356	0.00616841	0.0373691	0.476331	0.461627	0	0.011763	0	0.00659877	0.000143451	337.111
JF0526	Faeces	Loxodonta africana	-23.0712	7.76819	45.8609	1.95282	23.4844	39.3255	August	2004	Dry	Kruger Park	South Central	Basalt	Mazithi	J Codron et al (2011; Oecologia)	265m	-24.7217	31.8356	0.00616841	0.0373691	0.476331	0.461627	0	0.011763	0	0.00659877	0.000143451	337.111
JF0527	Faeces	Loxodonta africana	-21.1061	7.83978	44.0608	1.45547	30.2726	52.5939	August	2004	Dry	Kruger Park	South Central	Basalt	Mazithi	J Codron et al (2011; Oecologia)	265m	-24.7217	31.8356	0.00616841	0.0373691	0.476331	0.461627	0	0.011763	0	0.00659877	0.000143451	337.111
JF0528	Faeces	Loxodonta africana	-21.5645	7.72964	43.9444	1.7945	24.4884	49.4987	August	2004	Dry	Kruger Park	South Central	Basalt	Mazithi	J Codron et al (2011; Oecologia)	265m	-24.7217	31.8356	0.00616841	0.0373691	0.476331	0.461627	0	0.011763	0	0.00659877	0.000143451	337.111
JF0529	Faeces	Loxodonta africana	-22.8516	9.57928	43.0124	2.16803	19.8394	40.8083	August	2004	Dry	Kruger Park	South Central	Basalt	N'watinungu	J Codron et al (2011; Oecologia)	275m	-24.6824	31.8109	0.00574053	0.0479334	0.620336	0.308195	0	0.0121269	0	0.00566877	0	350.753
JF0530	Faeces	Loxodonta africana	-22.1256	7.2762	47.7452	1.50461	31.7327	45.71	August	2004	Dry	Kruger Park	South Central	Basalt	N'watinungu	J Codron et al (2011; Oecologia)	275m	-24.6824	31.8109	0.00574053	0.0479334	0.620336	0.308195	0	0.0121269	0	0.00566877	0	350.753
JF0531	Faeces	Loxodonta africana	-22.7566	7.13113	45.5963	1.27096	35.8754	41.45	August	2004	Dry	Kruger Park	South Central	Basalt	N'watinungu	J Codron et al (2011; Oecologia)	275m	-24.6824	31.8109	0.00574053	0.0479334	0.620336	0.308195	0	0.0121269	0	0.00566877	0	350.753
JF0532	Faeces	Loxodonta africana	-22.5087	7.24316	45.3866	1.58024	28.7213	43.124	August	2004	Dry	Kruger Park	South Central	Basalt	N'watinungu	J Codron et al (2011; Oecologia)	275m	-24.6824	31.8109	0.00574053	0.0479334	0.620336	0.308195	0	0.0121269	0	0.00566877	0	350.753
JF0533	Faeces	Loxodonta africana	-24.9371	7.5061	45.7022	2.04886	22.3062	23.5782	September	2004	Dry	Kruger Park	South	Granite	Sabie River	J Codron et al (2011; Oecologia)	282m	-24.9349	31.7017	0.0371459	0.525636	0.00451775	0.432198	0	0	0	0.000501972	0	240.308
JF0534	Faeces	Loxodonta africana	-26.3859	8.29936	45.8113	2.13833	21.4238	13.2862	September	2004	Dry	Kruger Park	South	Granite	Sabie River	J Codron et al (2011; Oecologia)	282m	-24.9349	31.7017	0.0371459	0.525636	0.00451775	0.432198	0	0	0	0.000501972	0	240.308
JF0535	Faeces	Loxodonta africana	-24.233	6.2692	45.6739	1.86873	24.4411	28.5794	September	2004	Dry	Kruger Park	South	Granite	Sabie River	J Codron et al (2011; Oecologia)	282m	-24.9349	31.7017	0.0371459	0.525636	0.00451775	0.432198	0	0	0	0.000501972	0	240.308
JF0536	Faeces	Loxodonta africana	-24.4525	6.44029	46.3233	1.50808	30.7167	27.0205	September	2004	Dry	Kruger Park	South	Granite	Sabie River	J Codron et al (2011; Oecologia)	282m	-24.9349	31.7017	0.0371459	0.525636	0.00451775	0.432198	0	0	0	0.000501972	0	240.308
JF0537	Faeces	Loxodonta africana	-23.4768	6.35355	47.567	1.40411	33.8769	33.9515	September	2004	Dry	Kruger Park	South	Granite	Sabie River	J Codron et al (2011; Oecologia)	282m	-24.9349	31.7017	0.0371459	0.525636	0.00451775	0.432198	0	0	0	0.000501972	0	240.308
JF0538	Faeces	Loxodonta africana	-24.2983	4.01491	46.9392	1.48038	31.7075	28.1156	September	2004	Dry	Kruger Park	South	Granite	Napi Boulder	J Codron et al (2011; Oecologia)	481m	-25.115	31.4003	0.00501864	0.580513	0.0142673	0.395325	0	0.00293949	0	0.00193576	0	240.909
JF0539	Faeces	Loxodonta africana	-24.4232	5.71828	45.2438	1.32804	34.068	27.2285	September	2004	Dry	Kruger Park	South	Granite	Napi Boulder	J Codron et al (2011; Oecologia)	481m	-25.115	31.4003	0.00501864	0.580513	0.0142673	0.395325	0	0.00293949	0	0.00193576	0	240.909
JF0540	Faeces	Loxodonta africana	-24.3836	4.50008	46.1696	1.20344	38.3646	27.5094	September	2004	Dry	Kruger Park	South	Granite	Napi Boulder	J Codron et al (2011; Oecologia)	481m	-25.115	31.4003	0.00501864	0.580513	0.0142673	0.395325	0	0.00293949	0	0.00193576	0	240.909
JF0541	Faeces	Loxodonta africana	-24.6347	7.28243	47.8578	1.35009	35.4478	25.7264	September	2004	Dry	Kruger Park	South	Granite	Napi Boulder	J Codron et al (2011; Oecologia)	481m	-25.115	31.4003	0.00501864	0.580513	0.0142673	0.395325	0	0.00293949	0	0.00193576	0	240.909
JF0542	Faeces	Loxodonta africana	-23.9104	6.5924	47.02	1.44071	32.6366	30.871	September	2004	Dry	Kruger Park	South	Granite	Shitlhave Dam	J Codron et al (2011; Oecologia)	570m	-25.1496	31.3028	0.00795357	0.461737	0.0568214	0.473488	0	0	0	0	0	257.918
JF0543	Faeces	Loxodonta africana	-23.4043	5.16941	47.2524	1.90151	24.8499	37.0767	September	2004	Dry	Kruger Park	South	Basalt	H10	J Codron et al (2011; Oecologia)	367m	-25.0425	31.9074	0.00222286	0.00853291	0.970744	0.0184999	0	0	0	0	0	395.777
JF0544	Faeces	Loxodonta africana	-25.2577	7.08944	46.2671	1.66116	27.8523	24.5632	September	2004	Dry	Kruger Park	South	Basalt	H10	J Codron et al (2011; Oecologia)	367m	-25.0425	31.9074	0.00222286	0.00853291	0.970744	0.0184999	0	0	0	0	0	395.777
JF0545	Faeces	Loxodonta africana	-25.8553	6.31525	45.6659	1.87494	24.3559	20.5282	September	2004	Dry	Kruger Park	South	Basalt	H10	J Codron et al (2011; Oecologia)	367m	-25.0425	31.9074	0.00222286	0.00853291	0.970744	0.0184999	0	0	0	0	0	395.777
JF0546	Faeces	Loxodonta africana	-25.0081	5.17112	44.4234	1.46554	30.3121	26.2485	September	2004	Dry	Kruger Park	South	Basalt	H10	J Codron et al (2011; Oecologia)	367m	-25.0425	31.9074	0.00222286	0.00853291	0.970744	0.0184999	0	0	0	0	0	395.777
JF0547	Faeces	Loxodonta africana	-24.7452	7.26442	44.4043	1.29581	34.2677	28.0237	September	2004	Dry	Kruger Park	South	Basalt	H10	J Codron et al (2011; Oecologia)	367m	-25.0425	31.9074	0.00222286	0.00853291	0.970744	0.0184999	0	0	0	0	0	395.777
JF0548	Faeces	Loxodonta africana	-24.1974	4.09943	44.0412	1.52192	28.9378	31.722	September	2004	Dry	Kruger Park	South	Basalt	H10	J Codron et al (2011; Oecologia)	367m	-25.0425	31.9074	0.00222286	0.00853291	0.970744	0.0184999	0	0	0	0	0	395.777
JF0549	Faeces	Loxodonta africana	-25.7999	6.47775	40.2649	1.4163	28.4297	20.9023	September	2004	Dry	Kruger Park	South	Basalt	H10	J Codron et al (2011; Oecologia)	367m	-25.0425	31.9074	0.00222286	0.00853291	0.970744	0.0184999	0	0	0	0	0	395.777
JF0550	Faeces	Loxodonta africana	-25.8651	5.49241	46.076	1.24034	37.1479	20.4622	September	2004	Dry	Kruger Park	South	Basalt	S29	J Codron et al (2011; Oecologia)	181m	-25.1126	31.9373	0.0983936	0.154116	0.628801	0.0973896	0.000215146	0.00107573	0	0.000215146	0.0197935	321.4
JF0551	Faeces	Loxodonta africana	-23.6935	6.43518	43.6261	1.58674	27.4942	35.1243	September	2004	Dry	Kruger Park	South	Basalt	S128	J Codron et al (2011; Oecologia)	201m	-25.0897	31.9111	0.018144	0.167671	0.735872	0.0730063	0	0.0037292	0	0.000717154	0.000860585	351.599
JF0552	Faeces	Loxodonta africana	-24.7204	4.26286	46.1515	1.38445	33.3355	28.1911	September	2004	Dry	Kruger Park	South	Basalt	S128	J Codron et al (2011; Oecologia)	201m	-25.0897	31.9111	0.018144	0.167671	0.735872	0.0730063	0	0.0037292	0	0.000717154	0.000860585	351.599
JF0567	Faeces	Loxodonta africana	-21.9301	4.24272	44.9648	1.58298	28.4052	43.5108	September	2004	Dry	Kruger Park	North Central	Granite	Ngwenyeni Bridge	J Codron et al (2011; Oecologia)	291m	-23.7824	31.3542	0.0223736	0.0630333	0.0337038	0.871423	0	0.00236644	0	0.00709932	0	289.753
JF0568	Faeces	Loxodonta africana	-22.2777	5.14213	46.2114	1.54763	29.8595	41.107	September	2004	Dry	Kruger Park	North Central	Granite	H14/S133	J Codron et al (2011; Oecologia)	294m	-23.7834	31.3597	0.0202911	0.0684018	0.0270309	0.87897	0	0.0019359	0	0.0033699	0	290.213
JF0569	Faeces	Loxodonta africana	-23.1962	4.22647	45.8606	1.4708	31.1806	34.7569	September	2004	Dry	Kruger Park	North Central	Granite	H14/S133	J Codron et al (2011; Oecologia)	294m	-23.7834	31.3597	0.0202911	0.0684018	0.0270309	0.87897	0	0.0019359	0	0.0033699	0	290.213
JF0571	Faeces	Loxodonta africana	-21.3194	3.72355	43.6312	1.20448	36.2242	47.7328	September	2004	Dry	Kruger Park	North Central	Granite	Letaba Bridge 2	J Codron et al (2011; Oecologia)	264m	-23.7597	31.3709	0.0436778	0.0892921	0.0488417	0.765259	0	0.0242416	0	0.0254608	0.00322743	271.34
JF0575	Faeces	Loxodonta africana	-20.9647	5.9743	45.762	1.1458	39.9391	50.0086	September	2004	Dry	Kruger Park	North Central	Basalt	Letaba Bridge	J Codron et al (2011; Oecologia)	232m	-23.8126	31.5825	0.0928781	0.185398	0.292548	0.323962	0	0.0314853	0	0.0698558	0.00387291	260.575
JF0576	Faeces	Loxodonta africana	-22.1316	8.49851	45.5669	1.54054	29.5785	41.2582	September	2004	Dry	Kruger Park	North Central	Basalt	Letaba Bridge	J Codron et al (2011; Oecologia)	232m	-23.8126	31.5825	0.0928781	0.185398	0.292548	0.323962	0	0.0314853	0	0.0698558	0.00387291	260.575
JF0577	Faeces	Loxodonta africana	-21.6347	9.09136	46.1858	1.08892	42.4142	44.9844	September	2004	Dry	Kruger Park	North Central	Basalt	Letaba Bridge	J Codron et al (2011; Oecologia)	232m	-23.8126	31.5825	0.0928781	0.185398	0.292548	0.323962	0	0.0314853	0	0.0698558	0.00387291	260.575
JF0578	Faeces	Loxodonta africana	-21.2037	7.64089	45.6117	1.04956	43.458	48.216	September	2004	Dry	Kruger Park	North Central	Basalt	Letaba Bridge	J Codron et al (2011; Oecologia)	232m	-23.8126	31.5825	0.0928781	0.185398	0.292548	0.323962	0	0.0314853	0	0.0698558	0.00387291	260.575
JF0579	Faeces	Loxodonta africana	-21.4341	8.69421	45.3479	1.6267	27.8772	46.4886	September	2004	Dry	Kruger Park	North Central	Basalt	Letaba Bridge	J Codron et al (2011; Oecologia)	232m	-23.8126	31.5825	0.0928781	0.185398	0.292548	0.323962	0	0.0314853	0	0.0698558	0.00387291	260.575
JF0580	Faeces	Loxodonta africana	-21.9727	1.6814	44.079	1.33828	32.937	42.4498	September	2004	Dry	Kruger Park	North Central	Basalt	Letaba Bridge	J Codron et al (2011; Oecologia)	232m	-23.8126	31.5825	0.0928781	0.185398	0.292548	0.323962	0	0.0314853	0	0.0698558	0.00387291	260.575
JF0581	Faeces	Loxodonta africana	-22.2282	1.78452	47.7721	1.50123	31.822	40.5339	September	2004	Dry	Kruger Park	North Central	Basalt	Letaba	J Codron et al (2011; Oecologia)	266m	-23.8626	31.5591	0.11515	0.168925	0.269807	0.445114	7.17e-05	0.0005736	0	0.0002868	7.17e-05	286.757
JF0582	Faeces	Loxodonta africana	-21.9809	4.56496	46.5433	1.85964	25.0282	42.3886	September	2004	Dry	Kruger Park	North Central	Basalt	Shamiriri	J Codron et al (2011; Oecologia)	294m	-23.9513	31.6194	0.0027963	0.0135513	0.192371	0.791281	0	0	0	0	0	317.323
JF0593	Faeces	Loxodonta africana	-24.0396	-2.1838	45.1979	1.39236	32.4613	29.9534	September	2004	Dry	Kruger Park	South Central	Granite	Mhisanamond	J Codron et al (2011; Oecologia)	311m	-24.6126	31.7111	0.0461031	0.395927	0.0818814	0.452069	0	0.0098946	0	0.0141249	0	252.169
JF0594	Faeces	Loxodonta africana	-26.4929	-2.1838	45.8334	1.13181	40.4959	12.5258	September	2004	Dry	Kruger Park	South Central	Granite	Mhisanamond	J Codron et al (2011; Oecologia)	311m	-24.6126	31.7111	0.0461031	0.395927	0.0818814	0.452069	0	0.0098946	0	0.0141249	0	252.169
JF0595	Faeces	Loxodonta africana	-23.0921	-2.1838	44.6703	1.36796	32.6548	36.6844	September	2004	Dry	Kruger Park	South Central	Granite	Mhisanamond	J Codron et al (2011; Oecologia)	311m	-24.6126	31.7111	0.0461031	0.395927	0.0818814	0.452069	0	0.0098946	0	0.0141249	0	252.169
JF0596	Faeces	Loxodonta africana	-25.4011	-2.1838	45.5423	1.55274	29.3304	20.2821	September	2004	Dry	Kruger Park	South Central	Granite	Mhisanamond	J Codron et al (2011; Oecologia)	311m	-24.6126	31.7111	0.0461031	0.395927	0.0818814	0.452069	0	0.0098946	0	0.0141249	0	252.169
JF0597	Faeces	Loxodonta africana	-25.283	9.49356	48.0662	2.31492	20.7637	21.1209	September	2004	Dry	Kruger Park	South Central	Granite	Mhisanamond	J Codron et al (2011; Oecologia)	311m	-24.6126	31.7111	0.0461031	0.395927	0.0818814	0.452069	0	0.0098946	0	0.0141249	0	252.169
JF0598	Faeces	Loxodonta africana	-25.6847	-2.1838	47.5893	1.28037	37.1684	18.2671	September	2004	Dry	Kruger Park	South Central	Granite	Mhisanamond	J Codron et al (2011; Oecologia)	311m	-24.6126	31.7111	0.0461031	0.395927	0.0818814	0.452069	0	0.0098946	0	0.0141249	0	252.169
JF0599	Faeces	Loxodonta africana	-20.8739	-2.1838	44.7469	1.4734	30.3698	52.441	September	2004	Dry	Kruger Park	South Central	Granite	Mhisanamond	J Codron et al (2011; Oecologia)	311m	-24.6126	31.7111	0.0461031	0.395927	0.0818814	0.452069	0	0.0098946	0	0.0141249	0	252.169
JF0600	Faeces	Loxodonta africana	-25.5979	6.26696	47.0145	1.46592	32.0717	18.8841	September	2004	Dry	Kruger Park	South Central	Granite	Mhisanamond	J Codron et al (2011; Oecologia)	311m	-24.6126	31.7111	0.0461031	0.395927	0.0818814	0.452069	0	0.0098946	0	0.0141249	0	252.169
JF0601	Faeces	Loxodonta africana	-23.3529	6.80559	43.0897	1.52442	28.2664	34.8313	September	2004	Dry	Kruger Park	South Central	Granite	Nhlanguleni	J Codron et al (2011; Oecologia)	349m	-24.7099	31.6574	0.013341	0.0918806	0.335605	0.521589	0	0.000215177	0	0.0373691	0	310.429
JF0602	Faeces	Loxodonta africana	-21.6522	-2.1838	44.3565	1.93668	22.9034	46.9127	September	2004	Dry	Kruger Park	South Central	Granite	Nhlanguleni	J Codron et al (2011; Oecologia)	349m	-24.7099	31.6574	0.013341	0.0918806	0.335605	0.521589	0	0.000215177	0	0.0373691	0	310.429
JF0603	Faeces	Loxodonta africana	-22.0416	4.93982	45.659	1.25856	36.2786	46.2772	September	2004	Dry	Kruger Park	South Central	Basalt	Ntomeni	J Codron et al (2011; Oecologia)	297m	-24.2691	31.7301	0.00107558	0.00631005	0.684712	0.307902	0	0	0	0	0	367.625
JF0604	Faeces	Loxodonta africana	-23.8736	-2.1838	43.5602	1.43832	30.2855	33.9083	September	2004	Dry	Kruger Park	South Central	Basalt	Ntomeni	J Codron et al (2011; Oecologia)	297m	-24.2691	31.7301	0.00107558	0.00631005	0.684712	0.307902	0	0	0	0	0	367.625
JF0605	Faeces	Loxodonta africana	-22.3322	-2.1838	45.2451	0.992413	45.591	44.3154	September	2004	Dry	Kruger Park	South Central	Basalt	Ntomeni	J Codron et al (2011; Oecologia)	297m	-24.2691	31.7301	0.00107558	0.00631005	0.684712	0.307902	0	0	0	0	0	367.625
JF0606	Faeces	Loxodonta africana	-20.4848	-2.1838	45.3372	1.13367	39.9917	56.7888	September	2004	Dry	Kruger Park	South Central	Basalt	N'wanetsi Bridge	J Codron et al (2011; Oecologia)	259m	-24.4196	31.7835	0.0329986	0.0433286	0.804591	0.116428	0	0.00172166	0	0.000932568	0	368.73
JF0607	Faeces	Loxodonta africana	-23.0794	-2.1838	38.4872	1.2357	31.1461	39.2707	September	2004	Dry	Kruger Park	South Central	Basalt	Sweni	J Codron et al (2011; Oecologia)	262m	-24.4331	31.788	0.0314114	0.0496271	0.767714	0.147232	0	0.00222318	0	0.00179289	0	364.322
JF0608	Faeces	Loxodonta africana	-25.313	-2.1838	45.2729	1.33819	33.8313	24.1898	September	2004	Dry	Kruger Park	South Central	Basalt	Sweni	J Codron et al (2011; Oecologia)	262m	-24.4331	31.788	0.0314114	0.0496271	0.767714	0.147232	0	0.00222318	0	0.00179289	0	364.322
JF0609	Faeces	Loxodonta africana	-23.183	6.21708	45.5339	1.21063	37.6118	38.5711	September	2004	Dry	Kruger Park	South Central	Basalt	Kumana	J Codron et al (2011; Oecologia)	305m	-24.6125	31.7914	0.00717154	0.224613	0.518072	0.234581	0	0.00996845	0	0.0055938	0	323.243
JF0610	Faeces	Loxodonta africana	-24.3769	-2.1838	46.5693	1.72187	27.0458	30.5098	September	2004	Dry	Kruger Park	South Central	Basalt	Kumana	J Codron et al (2011; Oecologia)	305m	-24.6125	31.7914	0.00717154	0.224613	0.518072	0.234581	0	0.00996845	0	0.0055938	0	323.243
JF0611	Faeces	Loxodonta africana	-23.5543	6.12807	46.4421	1.35789	34.2016	36.064	September	2004	Dry	Kruger Park	South Central	Basalt	Kumana	J Codron et al (2011; Oecologia)	305m	-24.6125	31.7914	0.00717154	0.224613	0.518072	0.234581	0	0.00996845	0	0.0055938	0	323.243
JF0612	Faeces	Loxodonta africana	-24.4805	6.20771	45.9834	1.61211	28.5237	29.8107	September	2004	Dry	Kruger Park	South Central	Basalt	Kumana	J Codron et al (2011; Oecologia)	305m	-24.6125	31.7914	0.00717154	0.224613	0.518072	0.234581	0	0.00996845	0	0.0055938	0	323.243
JF0613	Faeces	Loxodonta africana	-24.653	7.56997	42.4498	1.66627	25.4759	24.7423	October	2004	Wet	Kruger Park	South	Granite	Sabie River	J Codron et al (2011; Oecologia)	282m	-24.9349	31.7017	0.0371459	0.525636	0.00451775	0.432198	0	0	0	0.000501972	0	240.308
JF0614	Faeces	Loxodonta africana	-23.2055	6.89129	45.1472	1.52044	29.6934	36.0423	October	2004	Wet	Kruger Park	South	Granite	Sabie River	J Codron et al (2011; Oecologia)	282m	-24.9349	31.7017	0.0371459	0.525636	0.00451775	0.432198	0	0	0	0.000501972	0	240.308
JF0615	Faeces	Loxodonta africana	-23.2976	6.08939	48.0742	1.19686	40.1668	35.3235	October	2004	Wet	Kruger Park	South	Granite	Sabie River	J Codron et al (2011; Oecologia)	282m	-24.9349	31.7017	0.0371459	0.525636	0.00451775	0.432198	0	0	0	0.000501972	0	240.308
JF0616	Faeces	Loxodonta africana	-24.2427	7.14972	49.7806	1.57292	31.6485	27.9452	October	2004	Wet	Kruger Park	South	Granite	Sabie River	J Codron et al (2011; Oecologia)	282m	-24.9349	31.7017	0.0371459	0.525636	0.00451775	0.432198	0	0	0	0.000501972	0	240.308
JF0617	Faeces	Loxodonta africana	-23.3083	6.83083	47.1161	1.46706	32.116	35.2402	October	2004	Wet	Kruger Park	South	Granite	Sabie River	J Codron et al (2011; Oecologia)	282m	-24.9349	31.7017	0.0371459	0.525636	0.00451775	0.432198	0	0	0	0.000501972	0	240.308
JF0618	Faeces	Loxodonta africana	-23.8002	7.93117	46.9307	1.62039	28.9626	31.4	October	2004	Wet	Kruger Park	South	Granite	Sabie River	J Codron et al (2011; Oecologia)	282m	-24.9349	31.7017	0.0371459	0.525636	0.00451775	0.432198	0	0	0	0.000501972	0	240.308
JF0619	Faeces	Loxodonta africana	-24.9166	7.4444	44.3044	1.7193	25.7688	22.6839	October	2004	Wet	Kruger Park	South	Granite	Hlanganzwane	J Codron et al (2011; Oecologia)	238m	-25.2367	31.9857	0.0339214	0.180795	0.704317	0.0759466	0	0	0	0	0.00502008	344.062
JF0620	Faeces	Loxodonta africana	-24.7111	3.32717	45.2952	1.38815	32.63	24.288	October	2004	Wet	Kruger Park	South	Granite	Albasini Rd	J Codron et al (2011; Oecologia)	483m	-25.0479	31.27	0.00523335	0.302316	0.0470285	0.644204	0	0.000860277	0	0.000358449	0	273.059
JF0621	Faeces	Loxodonta africana	-25.104	5.50923	50.8503	1.40404	36.2171	21.2214	October	2004	Wet	Kruger Park	South	Granite	Doispane Rd	J Codron et al (2011; Oecologia)	326m	-25.0021	31.4834	0.0262516	0.526539	0.213599	0.224573	0	0.00580978	0	0.00208005	0.00114761	260.745
JF0622	Faeces	Loxodonta africana	-25.16	3.08484	48.4385	1.35846	35.6569	20.7838	October	2004	Wet	Kruger Park	South	Granite	Albasini Rd	J Codron et al (2011; Oecologia)	483m	-25.0479	31.27	0.00523335	0.302316	0.0470285	0.644204	0	0.000860277	0	0.000358449	0	273.059
JF0623	Faeces	Loxodonta africana	-23.3605	4.63995	46.0095	1.03693	44.3708	32.0416	October	2004	Wet	Kruger Park	South	Basalt	Lower Sabie	J Codron et al (2011; Oecologia)		-25.0938	31.9128	0.0367157	0.21384	0.654213	0.0875583	0	0.0041592	0	0.000717103	0.0027967	334.392
JF0624	Faeces	Loxodonta africana	-25.522	4.72368	46.2502	1.49783	30.8782	14.8875	October	2004	Wet	Kruger Park	South	Basalt	Lower Sabie	J Codron et al (2011; Oecologia)		-25.0938	31.9128	0.0367157	0.21384	0.654213	0.0875583	0	0.0041592	0	0.000717103	0.0027967	334.392
JF0625	Faeces	Loxodonta africana	-25.471	4.54767	47.9994	1.39453	34.4198	15.2922	October	2004	Wet	Kruger Park	South	Basalt	Lower Sabie	J Codron et al (2011; Oecologia)		-25.0938	31.9128	0.0367157	0.21384	0.654213	0.0875583	0	0.0041592	0	0.000717103	0.0027967	334.392
JF0626	Faeces	Loxodonta africana	-25.2752	4.2049	47.3878	1.47948	32.0302	16.8468	October	2004	Wet	Kruger Park	South	Basalt	Lower Sabie	J Codron et al (2011; Oecologia)		-25.0938	31.9128	0.0367157	0.21384	0.654213	0.0875583	0	0.0041592	0	0.000717103	0.0027967	334.392
JF0627	Faeces	Loxodonta africana	-24.7473	6.20325	44.7803	1.30617	34.2837	21.036	October	2004	Wet	Kruger Park	South	Basalt	Lower Sabie	J Codron et al (2011; Oecologia)		-25.0938	31.9128	0.0367157	0.21384	0.654213	0.0875583	0	0.0041592	0	0.000717103	0.0027967	334.392
JF0628	Faeces	Loxodonta africana	-23.8146	3.44203	49.3529	1.25891	39.2028	28.4382	October	2004	Wet	Kruger Park	South	Basalt	Lower Sabie	J Codron et al (2011; Oecologia)		-25.0938	31.9128	0.0367157	0.21384	0.654213	0.0875583	0	0.0041592	0	0.000717103	0.0027967	334.392
JF0629	Faeces	Loxodonta africana	-25.1828	4.59089	52.0457	1.71469	30.3528	17.5801	October	2004	Wet	Kruger Park	South	Basalt	Mativuhlungu	J Codron et al (2011; Oecologia)	194m	-25.1323	31.9096	0.0336321	0.320115	0.559412	0.0686267	0.0013625	0.000932234	0	0	0.0159197	311.739
JF0630	Faeces	Loxodonta africana	-25.3037	4.5306	48.3496	1.31805	36.6828	16.62	October	2004	Wet	Kruger Park	South	Basalt	Mativuhlungu	J Codron et al (2011; Oecologia)	194m	-25.1323	31.9096	0.0336321	0.320115	0.559412	0.0686267	0.0013625	0.000932234	0	0	0.0159197	311.739
JF0631	Faeces	Loxodonta africana	-25.1046	4.85772	49.2762	1.59469	30.9003	18.2005	October	2004	Wet	Kruger Park	South	Basalt	Mativuhlungu	J Codron et al (2011; Oecologia)	194m	-25.1323	31.9096	0.0336321	0.320115	0.559412	0.0686267	0.0013625	0.000932234	0	0	0.0159197	311.739
JF0632	Faeces	Loxodonta africana	-23.8612	4.59146	45.5894	1.20401	37.8647	28.068	October	2004	Wet	Kruger Park	South	Basalt	Mativuhlungu	J Codron et al (2011; Oecologia)	194m	-25.1323	31.9096	0.0336321	0.320115	0.559412	0.0686267	0.0013625	0.000932234	0	0	0.0159197	311.739
JF0643	Faeces	Loxodonta africana	-21.8912	4.77991	44.9542	1.45278	30.9436	37.2859	October	2004	Wet	Kruger Park	North Central	Granite	Vudogwa	J Codron et al (2011; Oecologia)	323m	-23.9468	31.2439	0.0145436	0.173664	0.104671	0.6761	0	0.0209199	0	0.00515833	0.0049434	280.886
JF0644	Faeces	Loxodonta africana	-22.7618	5.13207	46.8776	1.36177	34.424	29.4853	October	2004	Wet	Kruger Park	North Central	Granite	Vudogwa	J Codron et al (2011; Oecologia)	323m	-23.9468	31.2439	0.0145436	0.173664	0.104671	0.6761	0	0.0209199	0	0.00515833	0.0049434	280.886
JF0645	Faeces	Loxodonta africana	-21.3723	5.41036	46.825	1.24072	37.7402	41.935	October	2004	Wet	Kruger Park	North Central	Granite	Masorini	J Codron et al (2011; Oecologia)	421m	-23.9201	31.2686	0.0025095	0.0967233	0.229583	0.656342	7.17e-05	0.0132645	0	0.0007887	0.000717	308.332
JF0646	Faeces	Loxodonta africana	-21.4065	4.25838	44.4702	1.09341	40.6711	41.6284	October	2004	Wet	Kruger Park	North Central	Granite	Erfplaas	J Codron et al (2011; Oecologia)	414m	-23.9213	31.3037	0.00100358	0.135627	0.187025	0.654409	0	0.0206452	0	0.00129032	0	298.358
JF0647	Faeces	Loxodonta africana	-18.7238	4.51651	39.4461	1.55511	25.3655	65.6638	October	2004	Wet	Kruger Park	North Central	Granite	Erfplaas	J Codron et al (2011; Oecologia)	414m	-23.9213	31.3037	0.00100358	0.135627	0.187025	0.654409	0	0.0206452	0	0.00129032	0	298.358
JF0653	Faeces	Loxodonta africana	-22.2938	6.39499	45.8612	1.40216	32.7075	33.5265	October	2004	Wet	Kruger Park	North Central	Basalt	Letaba	J Codron et al (2011; Oecologia)	266m	-23.8626	31.5591	0.11515	0.168925	0.269807	0.445114	7.17e-05	0.0005736	0	0.0002868	7.17e-05	286.757
JF0654	Faeces	Loxodonta africana	-21.3314	5.94873	47.4924	1.1062	42.9329	41.3663	October	2004	Wet	Kruger Park	North Central	Basalt	Letaba	J Codron et al (2011; Oecologia)	266m	-23.8626	31.5591	0.11515	0.168925	0.269807	0.445114	7.17e-05	0.0005736	0	0.0002868	7.17e-05	286.757
JF0655	Faeces	Loxodonta africana	-22.1394	6.60033	44.9796	1.20914	37.1997	34.7841	October	2004	Wet	Kruger Park	North Central	Basalt	Letaba	J Codron et al (2011; Oecologia)	266m	-23.8626	31.5591	0.11515	0.168925	0.269807	0.445114	7.17e-05	0.0005736	0	0.0002868	7.17e-05	286.757
JF0656	Faeces	Loxodonta africana	-22.8588	5.97165	47.0406	1.23811	37.9939	28.9241	October	2004	Wet	Kruger Park	North Central	Basalt	Letaba	J Codron et al (2011; Oecologia)	266m	-23.8626	31.5591	0.11515	0.168925	0.269807	0.445114	7.17e-05	0.0005736	0	0.0002868	7.17e-05	286.757
JF0657	Faeces	Loxodonta africana	-21.5168	5.68492	47.0815	0.998556	47.1496	39.8557	October	2004	Wet	Kruger Park	North Central	Basalt	Letaba Bridge	J Codron et al (2011; Oecologia)	232m	-23.8126	31.5825	0.0928781	0.185398	0.292548	0.323962	0	0.0314853	0	0.0698558	0.00387291	260.575
JF0658	Faeces	Loxodonta africana	-21.6687	6.64146	43.5565	1.37819	31.6041	38.6188	October	2004	Wet	Kruger Park	North Central	Basalt	Letaba Bridge	J Codron et al (2011; Oecologia)	232m	-23.8126	31.5825	0.0928781	0.185398	0.292548	0.323962	0	0.0314853	0	0.0698558	0.00387291	260.575
JF0659	Faeces	Loxodonta africana	-24.4495	2.67976	47.9431	0.916721	52.2985	15.9658	October	2004	Wet	Kruger Park	North Central	Basalt	Twisappel	J Codron et al (2011; Oecologia)		-23.7157	31.5418	0.00444317	0.0278773	0.62921	0.334958	0	0.00143328	0	0.00207826	0	358.191
JF0673	Faeces	Loxodonta africana	-24.9018	6.53619	44.8668	1.6924	26.5107	22.7993	October	2004	Wet	Kruger Park	South Central	Granite	Ngwenyeni	J Codron et al (2011; Oecologia)	329m	-24.6096	31.6691	0.0506992	0.409251	0.324489	0.201219	0	0.0101829	0	0.0041592	0	277.081
JF0674	Faeces	Loxodonta africana	-24.2135	4.63085	50.268	1.40083	35.8844	28.1734	October	2004	Wet	Kruger Park	South Central	Granite	Ngwenyeni	J Codron et al (2011; Oecologia)	329m	-24.6096	31.6691	0.0506992	0.409251	0.324489	0.201219	0	0.0101829	0	0.0041592	0	277.081
JF0675	Faeces	Loxodonta africana	-24.5348	5.21974	45.1331	1.74181	25.9116	25.6651	October	2004	Wet	Kruger Park	South Central	Granite	Ngwenyeni	J Codron et al (2011; Oecologia)	329m	-24.6096	31.6691	0.0506992	0.409251	0.324489	0.201219	0	0.0101829	0	0.0041592	0	277.081
JF0676	Faeces	Loxodonta africana	-22.459	6.4508	44.1946	1.60958	27.4572	41.8702	October	2004	Wet	Kruger Park	South Central	Granite	Ngwenyeni	J Codron et al (2011; Oecologia)	329m	-24.6096	31.6691	0.0506992	0.409251	0.324489	0.201219	0	0.0101829	0	0.0041592	0	277.081
JF0677	Faeces	Loxodonta africana	-22.1252	5.78944	44.0953	1.29074	34.1628	44.4759	October	2004	Wet	Kruger Park	South Central	Granite	Bobbejaan Krans	J Codron et al (2011; Oecologia)	376m	-24.3886	31.6322	0.00308443	0.223155	0.645721	0.126031	0	0.00143462	0	0.000573847	0	341.037
JF0678	Faeces	Loxodonta africana	-24.0996	5.19557	43.8365	1.59847	27.4241	29.0622	October	2004	Wet	Kruger Park	South Central	Granite	Mzandzeni	J Codron et al (2011; Oecologia)	368m	-24.4795	31.6313	0.00631005	0.382475	0.238993	0.35028	0	0.011186	0	0.0107558	0	277.807
JF0679	Faeces	Loxodonta africana	-23.3792	4.69006	47.4356	1.65447	28.6711	34.6862	October	2004	Wet	Kruger Park	South Central	Granite	Mzandzeni	J Codron et al (2011; Oecologia)	368m	-24.4795	31.6313	0.00631005	0.382475	0.238993	0.35028	0	0.011186	0	0.0107558	0	277.807
JF0680	Faeces	Loxodonta africana	-22.1188	4.53642	47.6263	1.33319	35.7235	44.5265	October	2004	Wet	Kruger Park	South Central	Granite	Shimangwaneni	J Codron et al (2011; Oecologia)	357m	-24.5029	31.6386	0.00458584	0.250717	0.215391	0.513829	0	0.0116079	0	0.00308111	0.000788191	290.907
JF0681	Faeces	Loxodonta africana	-24.1742	4.38527	48.0625	1.45179	33.1058	28.48	October	2004	Wet	Kruger Park	South Central	Granite	Shimangwaneni	J Codron et al (2011; Oecologia)	357m	-24.5029	31.6386	0.00458584	0.250717	0.215391	0.513829	0	0.0116079	0	0.00308111	0.000788191	290.907
JF0682	Faeces	Loxodonta africana	-24.2314	5.1725	44.0637	1.62148	27.175	28.0333	October	2004	Wet	Kruger Park	South Central	Granite	Ngwenyeni	J Codron et al (2011; Oecologia)	329m	-24.6096	31.6691	0.0506992	0.409251	0.324489	0.201219	0	0.0101829	0	0.0041592	0	277.081
JF0683	Faeces	Loxodonta africana	-24.8044	5.45061	43.7259	1.12603	38.8319	20.5831	October	2004	Wet	Kruger Park	South Central	Basalt	Ntomeni	J Codron et al (2011; Oecologia)	297m	-24.2691	31.7301	0.00107558	0.00631005	0.684712	0.307902	0	0	0	0	0	367.625
JF0684	Faeces	Loxodonta africana	-24.6205	5.03334	45.1523	1.40358	32.1695	22.0425	October	2004	Wet	Kruger Park	South Central	Basalt	Ntomeni	J Codron et al (2011; Oecologia)	297m	-24.2691	31.7301	0.00107558	0.00631005	0.684712	0.307902	0	0	0	0	0	367.625
JF0685	Faeces	Loxodonta africana	-19.6078	4.53506	42.6358	1.19643	35.6357	61.8234	October	2004	Wet	Kruger Park	South Central	Basalt	Ntomeni	J Codron et al (2011; Oecologia)	297m	-24.2691	31.7301	0.00107558	0.00631005	0.684712	0.307902	0	0	0	0	0	367.625
JF0686	Faeces	Loxodonta africana	-25.4748	3.36256	49.3224	0.962226	51.2586	15.2628	October	2004	Wet	Kruger Park	South Central	Basalt	Satara	J Codron et al (2011; Oecologia)	266m	-24.6193	31.7938	0.00566471	0.154166	0.515775	0.309838	0	0.0100387	0	0.00451742	0	330.661
JF0687	Faeces	Loxodonta africana	-23.9544	4.98152	43.7541	1.2666	34.5445	27.3281	October	2004	Wet	Kruger Park	South Central	Basalt	Satara	J Codron et al (2011; Oecologia)	266m	-24.6193	31.7938	0.00566471	0.154166	0.515775	0.309838	0	0.0100387	0	0.00451742	0	330.661
JF0688	Faeces	Loxodonta africana	-21.5762	7.03673	44.8418	1.78455	25.1277	46.2016	October	2004	Wet	Kruger Park	South Central	Basalt	Kumana	J Codron et al (2011; Oecologia)	305m	-24.6125	31.7914	0.00717154	0.224613	0.518072	0.234581	0	0.00996845	0	0.0055938	0	323.243
JF0689	Faeces	Loxodonta africana	-22.0271	7.111	43.5462	1.72817	25.198	42.6236	October	2004	Wet	Kruger Park	South Central	Basalt	Kumana	J Codron et al (2011; Oecologia)	305m	-24.6125	31.7914	0.00717154	0.224613	0.518072	0.234581	0	0.00996845	0	0.0055938	0	323.243
JF0690	Faeces	Loxodonta africana	-23.2291	6.80188	47.815	1.64012	29.1533	33.0843	October	2004	Wet	Kruger Park	South Central	Basalt	Kumana	J Codron et al (2011; Oecologia)	305m	-24.6125	31.7914	0.00717154	0.224613	0.518072	0.234581	0	0.00996845	0	0.0055938	0	323.243
JF0691	Faeces	Loxodonta africana	-20.7415	5.75448	46.3009	1.11226	41.6277	52.8262	October	2004	Wet	Kruger Park	South Central	Basalt	N'watinungu	J Codron et al (2011; Oecologia)	275m	-24.6824	31.8109	0.00574053	0.0479334	0.620336	0.308195	0	0.0121269	0	0.00566877	0	350.753
JF0692	Faeces	Loxodonta africana	-21.3481	6.94631	46.3995	1.38579	33.4823	48.0124	October	2004	Wet	Kruger Park	South Central	Basalt	N'watinungu	J Codron et al (2011; Oecologia)	275m	-24.6824	31.8109	0.00574053	0.0479334	0.620336	0.308195	0	0.0121269	0	0.00566877	0	350.753
JF0693	Faeces	Loxodonta africana	-20.4706	5.23946	48.5899	1.80782	26.8777	57.3932	November	2004	Wet	Kruger Park	South	Granite	Maroela Loop	J Codron et al (2011; Oecologia)	272m	-24.9769	31.6234	0.103972	0.384268	0.0174244	0.458626	0	0.0119031	0	0.0166356	0.00717051	231.808
JF0694	Faeces	Loxodonta africana	-22.2222	6.26695	45.9424	2.32088	19.7953	43.7193	November	2004	Wet	Kruger Park	South	Granite	Sabie River	J Codron et al (2011; Oecologia)	282m	-24.9349	31.7017	0.0371459	0.525636	0.00451775	0.432198	0	0	0	0.000501972	0	240.308
JF0695	Faeces	Loxodonta africana	-22.1266	6.62556	44.4887	2.20068	20.2159	44.4654	November	2004	Wet	Kruger Park	South	Granite	Sabie River	J Codron et al (2011; Oecologia)	282m	-24.9349	31.7017	0.0371459	0.525636	0.00451775	0.432198	0	0	0	0.000501972	0	240.308
JF0696	Faeces	Loxodonta africana	-23.2087	6.78587	47.2095	2.35521	20.0447	36.0174	November	2004	Wet	Kruger Park	South	Granite	Sabie River	J Codron et al (2011; Oecologia)	282m	-24.9349	31.7017	0.0371459	0.525636	0.00451775	0.432198	0	0	0	0.000501972	0	240.308
JF0697	Faeces	Loxodonta africana	-21.9688	7.02505	45.0849	2.42222	18.613	45.6976	November	2004	Wet	Kruger Park	South	Granite	Sabie River	J Codron et al (2011; Oecologia)	282m	-24.9349	31.7017	0.0371459	0.525636	0.00451775	0.432198	0	0	0	0.000501972	0	240.308
JF0698	Faeces	Loxodonta africana	-22.555	6.93237	46.8308	2.36344	19.8147	41.1209	November	2004	Wet	Kruger Park	South	Granite	Sabie River	J Codron et al (2011; Oecologia)	282m	-24.9349	31.7017	0.0371459	0.525636	0.00451775	0.432198	0	0	0	0.000501972	0	240.308
JF0699	Faeces	Loxodonta africana	-21.5828	5.9992	46.7939	2.47362	18.9172	48.7104	November	2004	Wet	Kruger Park	South	Granite	N'watimvambu R	J Codron et al (2011; Oecologia)	214m	-25.0173	31.7822	0.0434658	0.30132	0.067996	0.548702	0	0.015421	0	0.017788	0.0053077	256.419
JF0700	Faeces	Loxodonta africana	-21.3327	4.86079	46.1633	2.11982	21.777	50.6633	November	2004	Wet	Kruger Park	South	Granite	De Laporte	J Codron et al (2011; Oecologia)	308m	-25.0516	31.5755	0.0692054	0.607788	0.0441767	0.275459	0	0.0027969	0	0.000573723	0	228.787
JF0701	Faeces	Loxodonta africana	-20.442	3.23558	46.2398	2.38081	19.4219	57.6166	November	2004	Wet	Kruger Park	South	Granite	Numbi	J Codron et al (2011; Oecologia)	616m	-25.1595	31.2365	0.217133	0.566738	0.00616487	0.202079	0.00143369	0.00329749	0.000358423	0.00250896	0.000286738	198.151
JF0702	Faeces	Loxodonta africana	-20.3883	2.73436	48.4517	2.18	22.2256	58.036	November	2004	Wet	Kruger Park	South	Granite	Numbi	J Codron et al (2011; Oecologia)	616m	-25.1595	31.2365	0.217133	0.566738	0.00616487	0.202079	0.00143369	0.00329749	0.000358423	0.00250896	0.000286738	198.151
JF0703	Faeces	Loxodonta africana	-21.7484	5.80593	44.5036	2.43625	18.2673	44.8354	November	2004	Wet	Kruger Park	South	Basalt	Gomondwane	J Codron et al (2011; Oecologia)		-25.2381	31.8504	0.338904	0.569287	0.0315593	0.0587434	0	0.00136279	0	0.000143451	0	177.995
JF0704	Faeces	Loxodonta africana	-20.5363	4.85286	43.9734	2.24911	19.5515	54.4545	November	2004	Wet	Kruger Park	South	Basalt	Gomondwane	J Codron et al (2011; Oecologia)		-25.2381	31.8504	0.338904	0.569287	0.0315593	0.0587434	0	0.00136279	0	0.000143451	0	177.995
JF0705	Faeces	Loxodonta africana	-22.1056	5.79073	43.5213	1.67515	25.9806	42.0009	November	2004	Wet	Kruger Park	South	Basalt	Gomondwane	J Codron et al (2011; Oecologia)		-25.2381	31.8504	0.338904	0.569287	0.0315593	0.0587434	0	0.00136279	0	0.000143451	0	177.995
JF0706	Faeces	Loxodonta africana	-23.1338	5.37144	45.8458	2.34901	19.5171	33.8406	November	2004	Wet	Kruger Park	South	Basalt	Gomondwane	J Codron et al (2011; Oecologia)		-25.2381	31.8504	0.338904	0.569287	0.0315593	0.0587434	0	0.00136279	0	0.000143451	0	177.995
JF0707	Faeces	Loxodonta africana	-22.6177	5.76424	42.9318	1.45305	29.5459	37.9368	November	2004	Wet	Kruger Park	South	Basalt	Gomondwane	J Codron et al (2011; Oecologia)		-25.2381	31.8504	0.338904	0.569287	0.0315593	0.0587434	0	0.00136279	0	0.000143451	0	177.995
JF0708	Faeces	Loxodonta africana	-21.3324	5.24155	45.5946	2.18253	20.8907	48.1368	November	2004	Wet	Kruger Park	South	Basalt	Gomondwane	J Codron et al (2011; Oecologia)		-25.2381	31.8504	0.338904	0.569287	0.0315593	0.0587434	0	0.00136279	0	0.000143451	0	177.995
JF0709	Faeces	Loxodonta africana	-22.1384	5.74385	44.6249	2.10932	21.1561	41.7406	November	2004	Wet	Kruger Park	South	Basalt	Gomondwane	J Codron et al (2011; Oecologia)		-25.2381	31.8504	0.338904	0.569287	0.0315593	0.0587434	0	0.00136279	0	0.000143451	0	177.995
JF0710	Faeces	Loxodonta africana	-22.3716	5.90106	46.1234	2.26336	20.3783	39.8895	November	2004	Wet	Kruger Park	South	Basalt	Gomondwane	J Codron et al (2011; Oecologia)		-25.2381	31.8504	0.338904	0.569287	0.0315593	0.0587434	0	0.00136279	0	0.000143451	0	177.995
JF0711	Faeces	Loxodonta africana	-23.4676	6.33038	44.5996	2.02526	22.0217	31.1918	November	2004	Wet	Kruger Park	South	Basalt	Gomondwane	J Codron et al (2011; Oecologia)		-25.2381	31.8504	0.338904	0.569287	0.0315593	0.0587434	0	0.00136279	0	0.000143451	0	177.995
JF0712	Faeces	Loxodonta africana	-22.5575	5.60068	44.2537	1.96754	22.4918	38.4145	November	2004	Wet	Kruger Park	South	Basalt	Mativuhlungu	J Codron et al (2011; Oecologia)	194m	-25.1323	31.9096	0.0336321	0.320115	0.559412	0.0686267	0.0013625	0.000932234	0	0	0.0159197	311.739
JF0730	Faeces	Loxodonta africana	-21.4743	5.00711	45.8274	1.30713	35.0594	41.021	November	2004	Wet	Kruger Park	North Central	Granite	Ngwenyeni Bridge	J Codron et al (2011; Oecologia)	291m	-23.7824	31.3542	0.0223736	0.0630333	0.0337038	0.871423	0	0.00236644	0	0.00709932	0	289.753
JF0739	Faeces	Loxodonta africana	-19.0707	5.52125	44.8418	1.33564	33.5732	59.7821	November	2004	Wet	Kruger Park	North Central	Basalt	Twisappel	J Codron et al (2011; Oecologia)		-23.7157	31.5418	0.00444317	0.0278773	0.62921	0.334958	0	0.00143328	0	0.00207826	0	358.191
JF0740	Faeces	Loxodonta africana	-18.7464	5.96516	43.4605	1.33648	32.5187	62.4236	November	2004	Wet	Kruger Park	North Central	Basalt	Twisappel	J Codron et al (2011; Oecologia)		-23.7157	31.5418	0.00444317	0.0278773	0.62921	0.334958	0	0.00143328	0	0.00207826	0	358.191
JF0741	Faeces	Loxodonta africana	-21.7498	6.51349	42.9227	1.13243	37.9032	37.9579	November	2004	Wet	Kruger Park	North Central	Basalt	Twisappel	J Codron et al (2011; Oecologia)		-23.7157	31.5418	0.00444317	0.0278773	0.62921	0.334958	0	0.00143328	0	0.00207826	0	358.191
JF0742	Faeces	Loxodonta africana	-22.791	7.58431	43.904	1.61239	27.2291	29.4763	November	2004	Wet	Kruger Park	North Central	Basalt	Twisappel	J Codron et al (2011; Oecologia)		-23.7157	31.5418	0.00444317	0.0278773	0.62921	0.334958	0	0.00143328	0	0.00207826	0	358.191
JF0753	Faeces	Loxodonta africana	-21.8494	5.75368	40.7807	1.53216	26.6165	46.6296	November	2004	Wet	Kruger Park	South Central	Granite	Timbavati	J Codron et al (2011; Oecologia)	303m	-24.2548	31.6083	0.0251721	0.0935169	0.210557	0.621271	0	0.0205106	0	0.028973	0	291.824
JF0754	Faeces	Loxodonta africana	-20.5371	5.59415	40.5442	1.55523	26.0696	56.8743	November	2004	Wet	Kruger Park	South Central	Granite	Timbavati	J Codron et al (2011; Oecologia)	303m	-24.2548	31.6083	0.0251721	0.0935169	0.210557	0.621271	0	0.0205106	0	0.028973	0	291.824
JF0755	Faeces	Loxodonta africana	-23.358	3.27858	45.7323	1.71893	26.6051	34.8519	November	2004	Wet	Kruger Park	South Central	Granite	Timbavati	J Codron et al (2011; Oecologia)	303m	-24.2548	31.6083	0.0251721	0.0935169	0.210557	0.621271	0	0.0205106	0	0.028973	0	291.824
JF0756	Faeces	Loxodonta africana	-15.0641	5.56393	38.4458	1.28338	29.9567	99.6019	November	2004	Wet	Kruger Park	South Central	Granite	Timbavati	J Codron et al (2011; Oecologia)	303m	-24.2548	31.6083	0.0251721	0.0935169	0.210557	0.621271	0	0.0205106	0	0.028973	0	291.824
JF0757	Faeces	Loxodonta africana	-21.39	6.36217	42.0743	1.47199	28.5832	50.2162	November	2004	Wet	Kruger Park	South Central	Granite	Leeubron	J Codron et al (2011; Oecologia)	332m	-24.328	31.5867	0.0350538	0.101935	0.255341	0.54172	0	0.0260932	0	0.0398566	0	288.545
JF0758	Faeces	Loxodonta africana	-21.7718	5.84775	39.6176	1.48578	26.6645	47.2352	November	2004	Wet	Kruger Park	South Central	Granite	Leeubron	J Codron et al (2011; Oecologia)	332m	-24.328	31.5867	0.0350538	0.101935	0.255341	0.54172	0	0.0260932	0	0.0398566	0	288.545
JF0759	Faeces	Loxodonta africana	-23.8478	3.94589	46.1904	1.46122	31.6109	31.0279	November	2004	Wet	Kruger Park	South Central	Granite	Bobbejaan Krans	J Codron et al (2011; Oecologia)	376m	-24.3886	31.6322	0.00308443	0.223155	0.645721	0.126031	0	0.00143462	0	0.000573847	0	341.037
JF0760	Faeces	Loxodonta africana	-23.193	4.77564	46.3812	1.80979	25.6279	36.1404	November	2004	Wet	Kruger Park	South Central	Granite	Bobbejaan Krans	J Codron et al (2011; Oecologia)	376m	-24.3886	31.6322	0.00308443	0.223155	0.645721	0.126031	0	0.00143462	0	0.000573847	0	341.037
JF0761	Faeces	Loxodonta africana	-21.1045	6.56419	41.4292	1.87068	22.1467	52.4448	November	2004	Wet	Kruger Park	South Central	Granite	Timbavati	J Codron et al (2011; Oecologia)	303m	-24.2548	31.6083	0.0251721	0.0935169	0.210557	0.621271	0	0.0205106	0	0.028973	0	291.824
JF0762	Faeces	Loxodonta africana	-22.9746	5.23621	43.6237	1.68742	25.8523	37.8452	November	2004	Wet	Kruger Park	South Central	Granite	Bobbejaan Krans	J Codron et al (2011; Oecologia)	376m	-24.3886	31.6322	0.00308443	0.223155	0.645721	0.126031	0	0.00143462	0	0.000573847	0	341.037
JF0763	Faeces	Loxodonta africana	-21.3204	6.08855	43.1403	1.64483	26.2279	48.2322	November	2004	Wet	Kruger Park	South Central	Basalt	N'wanetsi Bridge	J Codron et al (2011; Oecologia)	259m	-24.4196	31.7835	0.0329986	0.0433286	0.804591	0.116428	0	0.00172166	0	0.000932568	0	368.73
JF0764	Faeces	Loxodonta africana	-21.713	5.93544	44.608	1.62155	27.5094	45.1161	November	2004	Wet	Kruger Park	South Central	Basalt	N'wanetsi Bridge	J Codron et al (2011; Oecologia)	259m	-24.4196	31.7835	0.0329986	0.0433286	0.804591	0.116428	0	0.00172166	0	0.000932568	0	368.73
JF0765	Faeces	Loxodonta africana	-23.3394	6.47528	43.1829	1.85538	23.2744	32.2093	November	2004	Wet	Kruger Park	South Central	Basalt	N'wanetsi Bridge	J Codron et al (2011; Oecologia)	259m	-24.4196	31.7835	0.0329986	0.0433286	0.804591	0.116428	0	0.00172166	0	0.000932568	0	368.73
JF0766	Faeces	Loxodonta africana	-19.1648	6.60669	44.0263	2.58764	17.0141	65.3388	November	2004	Wet	Kruger Park	South Central	Basalt	Sweni	J Codron et al (2011; Oecologia)	262m	-24.4331	31.788	0.0314114	0.0496271	0.767714	0.147232	0	0.00222318	0	0.00179289	0	364.322
JF0767	Faeces	Loxodonta africana	-19.3766	5.78003	43.12	2.11047	20.4314	63.6578	November	2004	Wet	Kruger Park	South Central	Basalt	Sweni	J Codron et al (2011; Oecologia)	262m	-24.4331	31.788	0.0314114	0.0496271	0.767714	0.147232	0	0.00222318	0	0.00179289	0	364.322
JF0768	Faeces	Loxodonta africana	-21.9364	7.12703	44.6521	2.38761	18.7016	43.3433	November	2004	Wet	Kruger Park	South Central	Basalt	Sweni	J Codron et al (2011; Oecologia)	262m	-24.4331	31.788	0.0314114	0.0496271	0.767714	0.147232	0	0.00222318	0	0.00179289	0	364.322
JF0769	Faeces	Loxodonta africana	-19.3121	8.53399	41.4108	2.03331	20.3662	64.1697	November	2004	Wet	Kruger Park	South Central	Basalt	Kumana	J Codron et al (2011; Oecologia)	305m	-24.6125	31.7914	0.00717154	0.224613	0.518072	0.234581	0	0.00996845	0	0.0055938	0	323.243
JF0770	Faeces	Loxodonta africana	-20.0457	6.13532	43.2977	1.54506	28.0233	58.348	November	2004	Wet	Kruger Park	South Central	Basalt	N'watinungu	J Codron et al (2011; Oecologia)	275m	-24.6824	31.8109	0.00574053	0.0479334	0.620336	0.308195	0	0.0121269	0	0.00566877	0	350.753
JF0771	Faeces	Loxodonta africana	-20.3083	4.86101	42.8671	1.38523	30.9457	56.2638	November	2004	Wet	Kruger Park	South Central	Basalt	N'watinungu	J Codron et al (2011; Oecologia)	275m	-24.6824	31.8109	0.00574053	0.0479334	0.620336	0.308195	0	0.0121269	0	0.00566877	0	350.753
JF0772	Faeces	Loxodonta africana	-20.7046	6.36373	44.8935	1.60894	27.9025	53.1189	November	2004	Wet	Kruger Park	South Central	Basalt	N'watinungu	J Codron et al (2011; Oecologia)	275m	-24.6824	31.8109	0.00574053	0.0479334	0.620336	0.308195	0	0.0121269	0	0.00566877	0	350.753
JF0773	Faeces	Loxodonta africana	-21.4277	4.91547	45.7744	2.05301	22.2962	49.9216	December	2004	Wet	Kruger Park	South	Granite	Doispane Rd	J Codron et al (2011; Oecologia)	326m	-25.0021	31.4834	0.0262516	0.526539	0.213599	0.224573	0	0.00580978	0	0.00208005	0.00114761	260.745
JF0774	Faeces	Loxodonta africana	-19.0905	4.8545	42.9552	2.12358	20.2277	68.1681	December	2004	Wet	Kruger Park	South	Granite	Doispane Rd	J Codron et al (2011; Oecologia)	326m	-25.0021	31.4834	0.0262516	0.526539	0.213599	0.224573	0	0.00580978	0	0.00208005	0.00114761	260.745
JF0775	Faeces	Loxodonta africana	-18.8047	5.28268	42.8223	2.14288	19.9835	70.3991	December	2004	Wet	Kruger Park	South	Granite	Doispane Rd	J Codron et al (2011; Oecologia)	326m	-25.0021	31.4834	0.0262516	0.526539	0.213599	0.224573	0	0.00580978	0	0.00208005	0.00114761	260.745
JF0776	Faeces	Loxodonta africana	-21.4715	5.44812	43.6681	2.4309	17.9637	49.5793	December	2004	Wet	Kruger Park	South	Granite	Albasini Rd	J Codron et al (2011; Oecologia)	483m	-25.0479	31.27	0.00523335	0.302316	0.0470285	0.644204	0	0.000860277	0	0.000358449	0	273.059
JF0777	Faeces	Loxodonta africana	-21.0082	5.26181	43.6474	2.37224	18.3992	53.1968	December	2004	Wet	Kruger Park	South	Granite	Albasini Rd	J Codron et al (2011; Oecologia)	483m	-25.0479	31.27	0.00523335	0.302316	0.0470285	0.644204	0	0.000860277	0	0.000358449	0	273.059
JF0778	Faeces	Loxodonta africana	-20.5787	5.56443	44.8352	2.33478	19.2032	56.5498	December	2004	Wet	Kruger Park	South	Granite	Albasini Rd	J Codron et al (2011; Oecologia)	483m	-25.0479	31.27	0.00523335	0.302316	0.0470285	0.644204	0	0.000860277	0	0.000358449	0	273.059
JF0781	Faeces	Loxodonta africana	-21.257	4.49587	43.3682	2.65899	16.31	51.2546	December	2004	Wet	Kruger Park	South	Granite	Renosterpan	J Codron et al (2011; Oecologia)	401m	-25.3239	31.5209	0.00294012	0.374399	0.115669	0.399498	0	0.00143421	0	0.00200789	0.104052	241.291
JF0782	Faeces	Loxodonta africana	-20.6752	4.81293	43.1946	1.91276	22.5823	55.7961	December	2004	Wet	Kruger Park	South	Granite	Renosterpan	J Codron et al (2011; Oecologia)	401m	-25.3239	31.5209	0.00294012	0.374399	0.115669	0.399498	0	0.00143421	0	0.00200789	0.104052	241.291
JF0783	Faeces	Loxodonta africana	-17.4356	4.36617	41.8067	2.23705	18.6883	79.0616	December	2004	Wet	Kruger Park	South	Basalt	H10	J Codron et al (2011; Oecologia)	367m	-25.0425	31.9074	0.00222286	0.00853291	0.970744	0.0184999	0	0	0	0	0	395.777
JF0784	Faeces	Loxodonta africana	-16.7471	3.7963	44.2783	1.72084	25.7305	84.526	December	2004	Wet	Kruger Park	South	Basalt	H10	J Codron et al (2011; Oecologia)	367m	-25.0425	31.9074	0.00222286	0.00853291	0.970744	0.0184999	0	0	0	0	0	395.777
JF0785	Faeces	Loxodonta africana	-18.04	3.28305	42.7903	2.56893	16.6569	74.2654	December	2004	Wet	Kruger Park	South	Basalt	H10	J Codron et al (2011; Oecologia)	367m	-25.0425	31.9074	0.00222286	0.00853291	0.970744	0.0184999	0	0	0	0	0	395.777
JF0786	Faeces	Loxodonta africana	-17.9822	3.39209	42.8461	2.28096	18.7842	74.7236	December	2004	Wet	Kruger Park	South	Basalt	Mlondozi	J Codron et al (2011; Oecologia)	278m	-24.9301	31.9148	0.0110481	0.0272616	0.736782	0.223402	0	0.00129134	0	0	0.000215223	368.29
JF0787	Faeces	Loxodonta africana	-23.3965	5.73246	44.1448	1.85936	23.7419	31.7558	December	2004	Wet	Kruger Park	South	Basalt	Mlondozi	J Codron et al (2011; Oecologia)	278m	-24.9301	31.9148	0.0110481	0.0272616	0.736782	0.223402	0	0.00129134	0	0	0.000215223	368.29
JF0788	Faeces	Loxodonta africana	-15.9367	4.1568	43.1311	1.80442	23.903	90.9569	December	2004	Wet	Kruger Park	South	Basalt	Mlondozi	J Codron et al (2011; Oecologia)	278m	-24.9301	31.9148	0.0110481	0.0272616	0.736782	0.223402	0	0.00129134	0	0	0.000215223	368.29
JF0789	Faeces	Loxodonta africana	-15.6133	4.14267	41.6363	1.72456	24.1432	93.5241	December	2004	Wet	Kruger Park	South	Basalt	Mlondozi	J Codron et al (2011; Oecologia)	278m	-24.9301	31.9148	0.0110481	0.0272616	0.736782	0.223402	0	0.00129134	0	0	0.000215223	368.29
JF0790	Faeces	Loxodonta africana	-17.6995	3.98051	43.6826	2.14182	20.395	76.9679	December	2004	Wet	Kruger Park	South	Basalt	Mativuhlungu	J Codron et al (2011; Oecologia)	194m	-25.1323	31.9096	0.0336321	0.320115	0.559412	0.0686267	0.0013625	0.000932234	0	0	0.0159197	311.739
JF0791	Faeces	Loxodonta africana	-17.1026	4.81458	40.8944	1.83474	22.2889	81.7044	December	2004	Wet	Kruger Park	South	Basalt	Mativuhlungu	J Codron et al (2011; Oecologia)	194m	-25.1323	31.9096	0.0336321	0.320115	0.559412	0.0686267	0.0013625	0.000932234	0	0	0.0159197	311.739
JF0792	Faeces	Loxodonta africana	-17.5306	4.36444	42.7942	1.8514	23.1146	78.3078	December	2004	Wet	Kruger Park	South	Basalt	Mativuhlungu	J Codron et al (2011; Oecologia)	194m	-25.1323	31.9096	0.0336321	0.320115	0.559412	0.0686267	0.0013625	0.000932234	0	0	0.0159197	311.739
JF0820	Faeces	Loxodonta africana	-18.595	5.27104	42.4278	1.72718	24.5647	63.6565	December	2004	Wet	Kruger Park	North Central	Basalt	Twisappel	J Codron et al (2011; Oecologia)		-23.7157	31.5418	0.00444317	0.0278773	0.62921	0.334958	0	0.00143328	0	0.00207826	0	358.191
JF0821	Faeces	Loxodonta africana	-20.8718	4.67476	43.7247	1.66639	26.2392	45.1099	December	2004	Wet	Kruger Park	North Central	Basalt	Letaba Bridge	J Codron et al (2011; Oecologia)	232m	-23.8126	31.5825	0.0928781	0.185398	0.292548	0.323962	0	0.0314853	0	0.0698558	0.00387291	260.575
JF0822	Faeces	Loxodonta africana	-21.9506	5.14189	45.2362	1.56522	28.9009	36.3223	December	2004	Wet	Kruger Park	North Central	Basalt	Letaba	J Codron et al (2011; Oecologia)	266m	-23.8626	31.5591	0.11515	0.168925	0.269807	0.445114	7.17e-05	0.0005736	0	0.0002868	7.17e-05	286.757
JF0833	Faeces	Loxodonta africana	-17.6957	4.81519	39.4818	1.91068	20.6638	79.0574	December	2004	Wet	Kruger Park	South Central	Granite	Timbavati	J Codron et al (2011; Oecologia)	303m	-24.2548	31.6083	0.0251721	0.0935169	0.210557	0.621271	0	0.0205106	0	0.028973	0	291.824
JF0834	Faeces	Loxodonta africana	-21.487	5.76564	43.8001	2.16837	20.1996	49.4586	December	2004	Wet	Kruger Park	South Central	Granite	Timbavati	J Codron et al (2011; Oecologia)	303m	-24.2548	31.6083	0.0251721	0.0935169	0.210557	0.621271	0	0.0205106	0	0.028973	0	291.824
JF0835	Faeces	Loxodonta africana	-19.9894	4.48661	42.2651	2.15764	19.5885	61.1503	December	2004	Wet	Kruger Park	South Central	Granite	Timbavati	J Codron et al (2011; Oecologia)	303m	-24.2548	31.6083	0.0251721	0.0935169	0.210557	0.621271	0	0.0205106	0	0.028973	0	291.824
JF0836	Faeces	Loxodonta africana	-21.4013	5.18509	45.5644	2.00494	22.726	50.1275	December	2004	Wet	Kruger Park	South Central	Granite	Timbavati	J Codron et al (2011; Oecologia)	303m	-24.2548	31.6083	0.0251721	0.0935169	0.210557	0.621271	0	0.0205106	0	0.028973	0	291.824
JF0837	Faeces	Loxodonta africana	-21.9195	7.33897	36.6639	1.68399	21.772	46.0825	December	2004	Wet	Kruger Park	South Central	Granite	Timbavati	J Codron et al (2011; Oecologia)	303m	-24.2548	31.6083	0.0251721	0.0935169	0.210557	0.621271	0	0.0205106	0	0.028973	0	291.824
JF0838	Faeces	Loxodonta africana	-20.4249	3.96283	42.9375	2.29185	18.7348	57.7502	December	2004	Wet	Kruger Park	South Central	Granite	Timbavati	J Codron et al (2011; Oecologia)	303m	-24.2548	31.6083	0.0251721	0.0935169	0.210557	0.621271	0	0.0205106	0	0.028973	0	291.824
JF0839	Faeces	Loxodonta africana	-18.0268	5.06552	38.2438	1.57791	24.237	76.4724	December	2004	Wet	Kruger Park	South Central	Granite	Timbavati	J Codron et al (2011; Oecologia)	303m	-24.2548	31.6083	0.0251721	0.0935169	0.210557	0.621271	0	0.0205106	0	0.028973	0	291.824
JF0840	Faeces	Loxodonta africana	-18.387	4.79809	45.1165	1.99803	22.5805	73.6604	December	2004	Wet	Kruger Park	South Central	Granite	Timbavati	J Codron et al (2011; Oecologia)	303m	-24.2548	31.6083	0.0251721	0.0935169	0.210557	0.621271	0	0.0205106	0	0.028973	0	291.824
JF0841	Faeces	Loxodonta africana	-18.077	5.53106	43.383	1.86588	23.2508	76.0804	December	2004	Wet	Kruger Park	South Central	Granite	Timbavati	J Codron et al (2011; Oecologia)	303m	-24.2548	31.6083	0.0251721	0.0935169	0.210557	0.621271	0	0.0205106	0	0.028973	0	291.824
JF0842	Faeces	Loxodonta africana	-18.9235	6.0325	44.2868	2.06619	21.4341	69.4715	December	2004	Wet	Kruger Park	South Central	Granite	Timbavati	J Codron et al (2011; Oecologia)	303m	-24.2548	31.6083	0.0251721	0.0935169	0.210557	0.621271	0	0.0205106	0	0.028973	0	291.824
JF0843	Faeces	Loxodonta africana	-18.0225	6.8221	45.0201	2.18985	20.5586	74.4044	December	2004	Wet	Kruger Park	South Central	Basalt	Sweni	J Codron et al (2011; Oecologia)	262m	-24.4331	31.788	0.0314114	0.0496271	0.767714	0.147232	0	0.00222318	0	0.00179289	0	364.322
JF0844	Faeces	Loxodonta africana	-20.9276	6.94614	45.4973	2.08792	21.7907	51.3491	December	2004	Wet	Kruger Park	South Central	Basalt	Sweni	J Codron et al (2011; Oecologia)	262m	-24.4331	31.788	0.0314114	0.0496271	0.767714	0.147232	0	0.00222318	0	0.00179289	0	364.322
JF0845	Faeces	Loxodonta africana	-20.5914	6.09706	41.2428	1.68213	24.5182	54.0174	December	2004	Wet	Kruger Park	South Central	Basalt	Nkaya	J Codron et al (2011; Oecologia)	310m	-24.5393	31.7662	0.000573682	0.302617	0.599641	0.0968089	0	7.17103e-05	0	0.000286841	0	329.48
JF0846	Faeces	Loxodonta africana	-19.8299	7.08352	45.4253	2.28282	19.8987	60.0605	December	2004	Wet	Kruger Park	South Central	Basalt	Nkaya	J Codron et al (2011; Oecologia)	310m	-24.5393	31.7662	0.000573682	0.302617	0.599641	0.0968089	0	7.17103e-05	0	0.000286841	0	329.48
JF0847	Faeces	Loxodonta africana	-17.977	5.75897	43.6742	2.53615	17.2207	74.7652	December	2004	Wet	Kruger Park	South Central	Basalt	Nkaya	J Codron et al (2011; Oecologia)	310m	-24.5393	31.7662	0.000573682	0.302617	0.599641	0.0968089	0	7.17103e-05	0	0.000286841	0	329.48
JF0848	Faeces	Loxodonta africana	-21.5066	7.71081	45.7878	2.42685	18.8672	46.7545	December	2004	Wet	Kruger Park	South Central	Basalt	Kumana	J Codron et al (2011; Oecologia)	305m	-24.6125	31.7914	0.00717154	0.224613	0.518072	0.234581	0	0.00996845	0	0.0055938	0	323.243
JF0849	Faeces	Loxodonta africana	-20.1313	6.45783	46.7622	2.6691	17.5198	57.6688	December	2004	Wet	Kruger Park	South Central	Basalt	Kumana	J Codron et al (2011; Oecologia)	305m	-24.6125	31.7914	0.00717154	0.224613	0.518072	0.234581	0	0.00996845	0	0.0055938	0	323.243
JF0850	Faeces	Loxodonta africana	-16.9989	6.16033	44.1985	1.53708	28.7547	82.5279	December	2004	Wet	Kruger Park	South Central	Basalt	N'watinungu	J Codron et al (2011; Oecologia)	275m	-24.6824	31.8109	0.00574053	0.0479334	0.620336	0.308195	0	0.0121269	0	0.00566877	0	350.753
JF0851	Faeces	Loxodonta africana	-16.3768	5.65927	41.4703	1.61003	25.7576	87.4646	December	2004	Wet	Kruger Park	South Central	Basalt	N'watinungu	J Codron et al (2011; Oecologia)	275m	-24.6824	31.8109	0.00574053	0.0479334	0.620336	0.308195	0	0.0121269	0	0.00566877	0	350.753
JF0852	Faeces	Loxodonta africana	-15.9578	6.02964	44.4344	1.72421	25.7708	90.7897	December	2004	Wet	Kruger Park	South Central	Basalt	Mazithi	J Codron et al (2011; Oecologia)	265m	-24.7217	31.8356	0.00616841	0.0373691	0.476331	0.461627	0	0.011763	0	0.00659877	0.000143451	337.111
JF0863	Faeces	Loxodonta africana	-22.4172	6.61398	45.5872	1.70472	26.7418	42.1968	January	2005	Wet	Kruger Park	South	Granite	Sabie River	J Codron et al (2011; Oecologia)	282m	-24.9349	31.7017	0.0371459	0.525636	0.00451775	0.432198	0	0	0	0.000501972	0	240.308
JF0864	Faeces	Loxodonta africana	-22.355	7.56855	47.0135	1.82345	25.7828	42.6821	January	2005	Wet	Kruger Park	South	Granite	Sabie River	J Codron et al (2011; Oecologia)	282m	-24.9349	31.7017	0.0371459	0.525636	0.00451775	0.432198	0	0	0	0.000501972	0	240.308
JF0865	Faeces	Loxodonta africana	-22.5883	6.71538	45.5604	1.68376	27.0587	40.8607	January	2005	Wet	Kruger Park	South	Granite	Sabie River	J Codron et al (2011; Oecologia)	282m	-24.9349	31.7017	0.0371459	0.525636	0.00451775	0.432198	0	0	0	0.000501972	0	240.308
JF0866	Faeces	Loxodonta africana	-22.3235	7.62394	44.7543	1.7785	25.1641	42.928	January	2005	Wet	Kruger Park	South	Granite	Sabie River	J Codron et al (2011; Oecologia)	282m	-24.9349	31.7017	0.0371459	0.525636	0.00451775	0.432198	0	0	0	0.000501972	0	240.308
JF0867	Faeces	Loxodonta africana	-22.0129	6.66031	42.6103	1.64017	25.9792	45.3527	January	2005	Wet	Kruger Park	South	Granite	Sabie River	J Codron et al (2011; Oecologia)	282m	-24.9349	31.7017	0.0371459	0.525636	0.00451775	0.432198	0	0	0	0.000501972	0	240.308
JF0868	Faeces	Loxodonta africana	-22.8156	7.44878	39.3874	1.51092	26.0684	39.0867	January	2005	Wet	Kruger Park	South	Granite	Sabie River	J Codron et al (2011; Oecologia)	282m	-24.9349	31.7017	0.0371459	0.525636	0.00451775	0.432198	0	0	0	0.000501972	0	240.308
JF0869	Faeces	Loxodonta africana	-22.6925	7.55946	40.7509	1.39581	29.1951	40.0476	January	2005	Wet	Kruger Park	South	Granite	Sabie River	J Codron et al (2011; Oecologia)	282m	-24.9349	31.7017	0.0371459	0.525636	0.00451775	0.432198	0	0	0	0.000501972	0	240.308
JF0870	Faeces	Loxodonta africana	-21.1032	6.80499	44.5372	1.76415	25.2456	52.4548	January	2005	Wet	Kruger Park	South	Granite	Sabie River	J Codron et al (2011; Oecologia)	282m	-24.9349	31.7017	0.0371459	0.525636	0.00451775	0.432198	0	0	0	0.000501972	0	240.308
JF0871	Faeces	Loxodonta africana	-23.3564	6.88372	46.5477	2.04031	22.814	34.8646	January	2005	Wet	Kruger Park	South	Granite	Sabie River	J Codron et al (2011; Oecologia)	282m	-24.9349	31.7017	0.0371459	0.525636	0.00451775	0.432198	0	0	0	0.000501972	0	240.308
JF0872	Faeces	Loxodonta africana	-23.3559	7.4604	45.9155	1.78871	25.6696	34.8687	January	2005	Wet	Kruger Park	South	Granite	Sabie River	J Codron et al (2011; Oecologia)	282m	-24.9349	31.7017	0.0371459	0.525636	0.00451775	0.432198	0	0	0	0.000501972	0	240.308
JF0873	Faeces	Loxodonta africana	-21.8347	4.35987	29.8969	1.58682	18.8407	44.1504	January	2005	Wet	Kruger Park	South	Basalt	Nthandanyathi	J Codron et al (2011; Oecologia)	181m	-25.1997	31.9544	0.0159208	0.0383678	0.915663	0.0300488	0	0	0	0	0	384.545
JF0874	Faeces	Loxodonta africana	-22.4061	4.49655	44.2804	1.74184	25.4217	39.6156	January	2005	Wet	Kruger Park	South	Basalt	Hlanganzwane	J Codron et al (2011; Oecologia)	238m	-25.2367	31.9857	0.0339214	0.180795	0.704317	0.0759466	0	0	0	0	0.00502008	344.062
JF0875	Faeces	Loxodonta africana	-21.8738	5.32975	34.0446	1.56201	21.7954	43.8401	January	2005	Wet	Kruger Park	South	Basalt	Hlanganzwane	J Codron et al (2011; Oecologia)	238m	-25.2367	31.9857	0.0339214	0.180795	0.704317	0.0759466	0	0	0	0	0.00502008	344.062
JF0876	Faeces	Loxodonta africana	-20.8651	6.03795	37.3564	1.8314	20.3978	51.8453	January	2005	Wet	Kruger Park	South	Basalt	Crocodile River	J Codron et al (2011; Oecologia)	251m	-25.3418	31.9405	0.113909	0.0639122	0.51969	0.0522201	0.23786	0.00215193	0.00150635	0.00681443	0.00193673	247.715
JF0877	Faeces	Loxodonta africana	-22.704	5.39376	37.1187	1.63623	22.6854	37.2519	January	2005	Wet	Kruger Park	South	Basalt	Crocodile River	J Codron et al (2011; Oecologia)	251m	-25.3418	31.9405	0.113909	0.0639122	0.51969	0.0522201	0.23786	0.00215193	0.00150635	0.00681443	0.00193673	247.715
JF0878	Faeces	Loxodonta africana	-22.3136	7.44498	41.059	1.67322	24.5389	40.35	January	2005	Wet	Kruger Park	South	Basalt	Crocodile River	J Codron et al (2011; Oecologia)	251m	-25.3418	31.9405	0.113909	0.0639122	0.51969	0.0522201	0.23786	0.00215193	0.00150635	0.00681443	0.00193673	247.715
JF0879	Faeces	Loxodonta africana	-20.9858	5.96836	42.6822	1.92174	22.2102	50.8871	January	2005	Wet	Kruger Park	South	Basalt	Cezantfombi	J Codron et al (2011; Oecologia)	163m	-25.3329	31.8799	0.0207168	0.117634	0.806452	0.0541219	7.16846e-05	0.00100358	0	0	0	364.416
JF0880	Faeces	Loxodonta africana	-21.8632	4.4624	37.5861	1.75867	21.3719	43.9239	January	2005	Wet	Kruger Park	South	Basalt	Cezantfombi	J Codron et al (2011; Oecologia)	163m	-25.3329	31.8799	0.0207168	0.117634	0.806452	0.0541219	7.16846e-05	0.00100358	0	0	0	364.416
JF0881	Faeces	Loxodonta africana	-21.3853	4.99368	38.7304	1.99261	19.4371	47.7168	January	2005	Wet	Kruger Park	South	Basalt	Cezantfombi	J Codron et al (2011; Oecologia)	163m	-25.3329	31.8799	0.0207168	0.117634	0.806452	0.0541219	7.16846e-05	0.00100358	0	0	0	364.416
JF0882	Faeces	Loxodonta africana	-21.4536	4.76002	46.2113	1.6981	27.2135	47.1751	January	2005	Wet	Kruger Park	South	Basalt	Cezantfombi	J Codron et al (2011; Oecologia)	163m	-25.3329	31.8799	0.0207168	0.117634	0.806452	0.0541219	7.16846e-05	0.00100358	0	0	0	364.416
JF0894	Faeces	Loxodonta africana	-20.7724	5.46174	45.5393	1.75607	25.9324	47.3099	January	2005	Wet	Kruger Park	North Central	Granite	Letaba Bridge 2	J Codron et al (2011; Oecologia)	264m	-23.7597	31.3709	0.0436778	0.0892921	0.0488417	0.765259	0	0.0242416	0	0.0254608	0.00322743	271.34
JF0895	Faeces	Loxodonta africana	-20.266	5.58066	43.9245	1.8211	24.1198	51.847	January	2005	Wet	Kruger Park	North Central	Granite	Letaba Bridge 2	J Codron et al (2011; Oecologia)	264m	-23.7597	31.3709	0.0436778	0.0892921	0.0488417	0.765259	0	0.0242416	0	0.0254608	0.00322743	271.34
JF0896	Faeces	Loxodonta africana	-20.7155	5.58581	41.9407	1.65746	25.3042	47.8196	January	2005	Wet	Kruger Park	North Central	Granite	Letaba Bridge 2	J Codron et al (2011; Oecologia)	264m	-23.7597	31.3709	0.0436778	0.0892921	0.0488417	0.765259	0	0.0242416	0	0.0254608	0.00322743	271.34
JF0897	Faeces	Loxodonta africana	-19.8197	4.52277	35.3311	1.66041	21.2786	55.8452	January	2005	Wet	Kruger Park	North Central	Granite	Letaba Bridge 2	J Codron et al (2011; Oecologia)	264m	-23.7597	31.3709	0.0436778	0.0892921	0.0488417	0.765259	0	0.0242416	0	0.0254608	0.00322743	271.34
JF0898	Faeces	Loxodonta africana	-19.934	5.94337	45.084	1.50885	29.8797	54.8218	January	2005	Wet	Kruger Park	North Central	Granite	Letaba Bridge 2	J Codron et al (2011; Oecologia)	264m	-23.7597	31.3709	0.0436778	0.0892921	0.0488417	0.765259	0	0.0242416	0	0.0254608	0.00322743	271.34
JF0899	Faeces	Loxodonta africana	-20.1693	6.15865	44.4172	1.78885	24.8301	52.713	January	2005	Wet	Kruger Park	North Central	Granite	Letaba Bridge 2	J Codron et al (2011; Oecologia)	264m	-23.7597	31.3709	0.0436778	0.0892921	0.0488417	0.765259	0	0.0242416	0	0.0254608	0.00322743	271.34
JF0900	Faeces	Loxodonta africana	-21.2854	6.10198	45.7666	1.84894	24.7528	42.7136	January	2005	Wet	Kruger Park	North Central	Granite	Letaba Bridge 2	J Codron et al (2011; Oecologia)	264m	-23.7597	31.3709	0.0436778	0.0892921	0.0488417	0.765259	0	0.0242416	0	0.0254608	0.00322743	271.34
JF0901	Faeces	Loxodonta africana	-19.6756	5.02881	46.2298	1.61563	28.614	57.1365	January	2005	Wet	Kruger Park	North Central	Granite	Letaba Bridge 2	J Codron et al (2011; Oecologia)	264m	-23.7597	31.3709	0.0436778	0.0892921	0.0488417	0.765259	0	0.0242416	0	0.0254608	0.00322743	271.34
JF0903	Faeces	Loxodonta africana	-18.9286	4.13994	42.5202	1.79518	23.6858	60.9395	January	2005	Wet	Kruger Park	North Central	Basalt	Letaba	J Codron et al (2011; Oecologia)	266m	-23.8626	31.5591	0.11515	0.168925	0.269807	0.445114	7.17e-05	0.0005736	0	0.0002868	7.17e-05	286.757
JF0904	Faeces	Loxodonta africana	-20.382	6.27759	43.9436	1.85954	23.6314	49.1001	January	2005	Wet	Kruger Park	North Central	Basalt	Letaba	J Codron et al (2011; Oecologia)	266m	-23.8626	31.5591	0.11515	0.168925	0.269807	0.445114	7.17e-05	0.0005736	0	0.0002868	7.17e-05	286.757
JF0907	Faeces	Loxodonta africana	-19.2967	5.40848	42.1418	2.0913	20.151	57.9406	January	2005	Wet	Kruger Park	North Central	Basalt	Letaba Bridge	J Codron et al (2011; Oecologia)	232m	-23.8126	31.5825	0.0928781	0.185398	0.292548	0.323962	0	0.0314853	0	0.0698558	0.00387291	260.575
JF0908	Faeces	Loxodonta africana	-18.7145	5.3422	44.2444	1.45207	30.4698	62.6834	January	2005	Wet	Kruger Park	North Central	Basalt	Twisappel	J Codron et al (2011; Oecologia)		-23.7157	31.5418	0.00444317	0.0278773	0.62921	0.334958	0	0.00143328	0	0.00207826	0	358.191
JF0909	Faeces	Loxodonta africana	-19.9813	5.0976	42.762	1.6586	25.782	52.3643	January	2005	Wet	Kruger Park	North Central	Basalt	Twisappel	J Codron et al (2011; Oecologia)		-23.7157	31.5418	0.00444317	0.0278773	0.62921	0.334958	0	0.00143328	0	0.00207826	0	358.191
JF0910	Faeces	Loxodonta africana	-19.9619	3.49851	41.872	1.5749	26.5871	52.5221	January	2005	Wet	Kruger Park	North Central	Basalt	Twisappel	J Codron et al (2011; Oecologia)		-23.7157	31.5418	0.00444317	0.0278773	0.62921	0.334958	0	0.00143328	0	0.00207826	0	358.191
JF0911	Faeces	Loxodonta africana	-17.8453	4.8869	42.3247	1.26616	33.4275	69.7638	January	2005	Wet	Kruger Park	North Central	Basalt	Twisappel	J Codron et al (2011; Oecologia)		-23.7157	31.5418	0.00444317	0.0278773	0.62921	0.334958	0	0.00143328	0	0.00207826	0	358.191
JF0923	Faeces	Loxodonta africana	-20.9072	5.16366	32.664	1.69422	19.2797	53.9848	January	2005	Wet	Kruger Park	South Central	Granite	Mantimahle	J Codron et al (2011; Oecologia)	287m	-24.8998	31.7372	0.0611426	0.273457	0.121067	0.538886	0	0.00157695	0	0.00387069	0	270.898
JF0924	Faeces	Loxodonta africana	-21.8006	5.65008	24.6711	1.10673	22.292	47.0106	January	2005	Wet	Kruger Park	South Central	Granite	Mantimahle	J Codron et al (2011; Oecologia)	287m	-24.8998	31.7372	0.0611426	0.273457	0.121067	0.538886	0	0.00157695	0	0.00387069	0	270.898
JF0925	Faeces	Loxodonta africana	-21.2229	4.83451	44.6284	1.88462	23.6803	51.5206	January	2005	Wet	Kruger Park	South Central	Granite	Mantimahle	J Codron et al (2011; Oecologia)	287m	-24.8998	31.7372	0.0611426	0.273457	0.121067	0.538886	0	0.00157695	0	0.00387069	0	270.898
JF0926	Faeces	Loxodonta africana	-20.088	4.38549	37.1681	1.51045	24.6073	60.3805	January	2005	Wet	Kruger Park	South Central	Granite	Mantimahle	J Codron et al (2011; Oecologia)	287m	-24.8998	31.7372	0.0611426	0.273457	0.121067	0.538886	0	0.00157695	0	0.00387069	0	270.898
JF0927	Faeces	Loxodonta africana	-20.3961	4.52669	33.9994	1.19159	28.5328	57.9752	January	2005	Wet	Kruger Park	South Central	Granite	Mantimahle	J Codron et al (2011; Oecologia)	287m	-24.8998	31.7372	0.0611426	0.273457	0.121067	0.538886	0	0.00157695	0	0.00387069	0	270.898
JF0928	Faeces	Loxodonta africana	-19.8004	7.81408	42.7468	1.86122	22.9671	62.626	January	2005	Wet	Kruger Park	South Central	Granite	Mantimahle	J Codron et al (2011; Oecologia)	287m	-24.8998	31.7372	0.0611426	0.273457	0.121067	0.538886	0	0.00157695	0	0.00387069	0	270.898
JF0929	Faeces	Loxodonta africana	-20.0288	7.34884	34.6597	1.62452	21.3353	60.8427	January	2005	Wet	Kruger Park	South Central	Granite	Mantimahle	J Codron et al (2011; Oecologia)	287m	-24.8998	31.7372	0.0611426	0.273457	0.121067	0.538886	0	0.00157695	0	0.00387069	0	270.898
JF0930	Faeces	Loxodonta africana	-20.3315	7.49378	39.8414	1.99036	20.0172	58.4793	January	2005	Wet	Kruger Park	South Central	Granite	Mantimahle	J Codron et al (2011; Oecologia)	287m	-24.8998	31.7372	0.0611426	0.273457	0.121067	0.538886	0	0.00157695	0	0.00387069	0	270.898
JF0931	Faeces	Loxodonta africana	-20.8992	7.78366	27.7471	1.40549	19.742	54.048	January	2005	Wet	Kruger Park	South Central	Granite	Mantimahle	J Codron et al (2011; Oecologia)	287m	-24.8998	31.7372	0.0611426	0.273457	0.121067	0.538886	0	0.00157695	0	0.00387069	0	270.898
JF0932	Faeces	Loxodonta africana	-22.6	5.10701	26.6195	1.25685	21.1795	40.7697	January	2005	Wet	Kruger Park	South Central	Granite	Mantimahle	J Codron et al (2011; Oecologia)	287m	-24.8998	31.7372	0.0611426	0.273457	0.121067	0.538886	0	0.00157695	0	0.00387069	0	270.898
JF0933	Faeces	Loxodonta africana	-19.2746	5.32535	42.1425	1.6944	24.8717	64.4672	January	2005	Wet	Kruger Park	South Central	Basalt	Ntomeni	J Codron et al (2011; Oecologia)	297m	-24.2691	31.7301	0.00107558	0.00631005	0.684712	0.307902	0	0	0	0	0	367.625
JF0934	Faeces	Loxodonta africana	-18.0081	5.20131	39.2673	1.46324	26.8359	74.5187	January	2005	Wet	Kruger Park	South Central	Basalt	N'watinungu	J Codron et al (2011; Oecologia)	275m	-24.6824	31.8109	0.00574053	0.0479334	0.620336	0.308195	0	0.0121269	0	0.00566877	0	350.753
JF0935	Faeces	Loxodonta africana	-25.3153	7.04595	35.2937	1.86922	18.8815	16.5282	January	2005	Wet	Kruger Park	South Central	Basalt	N'watinungu	J Codron et al (2011; Oecologia)	275m	-24.6824	31.8109	0.00574053	0.0479334	0.620336	0.308195	0	0.0121269	0	0.00566877	0	350.753
JF0936	Faeces	Loxodonta africana	-19.7695	6.80531	33.0108	1.66276	19.853	60.5398	January	2005	Wet	Kruger Park	South Central	Basalt	N'watinungu	J Codron et al (2011; Oecologia)	275m	-24.6824	31.8109	0.00574053	0.0479334	0.620336	0.308195	0	0.0121269	0	0.00566877	0	350.753
JF0937	Faeces	Loxodonta africana	-18.3538	6.06765	42.5219	1.76846	24.0446	71.7747	January	2005	Wet	Kruger Park	South Central	Basalt	N'watinungu	J Codron et al (2011; Oecologia)	275m	-24.6824	31.8109	0.00574053	0.0479334	0.620336	0.308195	0	0.0121269	0	0.00566877	0	350.753
JF0938	Faeces	Loxodonta africana	-21.5469	7.00247	39.4793	1.68873	23.3781	46.4342	January	2005	Wet	Kruger Park	South Central	Basalt	Kumana	J Codron et al (2011; Oecologia)	305m	-24.6125	31.7914	0.00717154	0.224613	0.518072	0.234581	0	0.00996845	0	0.0055938	0	323.243
JF0939	Faeces	Loxodonta africana	-21.0612	6.35284	35.6491	1.86055	19.1605	50.289	January	2005	Wet	Kruger Park	South Central	Basalt	Nkaya	J Codron et al (2011; Oecologia)	310m	-24.5393	31.7662	0.000573682	0.302617	0.599641	0.0968089	0	7.17103e-05	0	0.000286841	0	329.48
JF0940	Faeces	Loxodonta africana	-19.849	5.77063	36.5005	1.43914	25.3627	59.9091	January	2005	Wet	Kruger Park	South Central	Basalt	Satara	J Codron et al (2011; Oecologia)	266m	-24.6193	31.7938	0.00566471	0.154166	0.515775	0.309838	0	0.0100387	0	0.00451742	0	330.661
JF0941	Faeces	Loxodonta africana	-20.5956	5.71114	43.8229	1.61541	27.1281	53.9837	January	2005	Wet	Kruger Park	South Central	Basalt	Satara	J Codron et al (2011; Oecologia)	266m	-24.6193	31.7938	0.00566471	0.154166	0.515775	0.309838	0	0.0100387	0	0.00451742	0	330.661
JF0942	Faeces	Loxodonta africana	-20.1766	5.81873	40.5033	1.77245	22.8516	57.3094	January	2005	Wet	Kruger Park	South Central	Basalt	Ntomeni	J Codron et al (2011; Oecologia)	297m	-24.2691	31.7301	0.00107558	0.00631005	0.684712	0.307902	0	0	0	0	0	367.625
KF0078	Faeces	Loxodonta africana	-24.253	5.79025	37.0729	2.2076	16.7933	20.4494	June	2002	Dry	Kruger Park	South	Basalt	Crocodile River	J Codron et al (2006; Jmamm)	251m	-25.3418	31.9405	0.113909	0.0639122	0.51969	0.0522201	0.23786	0.00215193	0.00150635	0.00681443	0.00193673	247.715
KF0098	Faeces	Loxodonta africana	-24.8039	6.17385	41.4452	1.91541	21.6378	16.7524	June	2002	Dry	Kruger Park	South	Granite	Renosterkoppies	J Codron et al (2006; Jmamm)	282m	-25.072	31.6105	0.0642524	0.560488	0.00501972	0.348153	0	0.00394407	0	0.0181427	0	224.977
KF0099	Faeces	Loxodonta africana	-25.1286	7.04814	38.8936	1.91849	20.2731	14.5733	June	2002	Dry	Kruger Park	South	Granite	Renosterkoppies	J Codron et al (2006; Jmamm)	282m	-25.072	31.6105	0.0642524	0.560488	0.00501972	0.348153	0	0.00394407	0	0.0181427	0	224.977
KF0157	Faeces	Loxodonta africana	-24.1	4.37238	48.2167	0.881822	54.6785	21.4766	June	2002	Dry	Kruger Park	South	Granite	Maroela Loop	J Codron et al (2006; Jmamm)	272m	-24.9769	31.6234	0.103972	0.384268	0.0174244	0.458626	0	0.0119031	0	0.0166356	0.00717051	231.808
KF0158	Faeces	Loxodonta africana	-26.3572	4.22255	48.3188	0.985011	49.0541	6.3277	June	2002	Dry	Kruger Park	South	Granite	Maroela Loop	J Codron et al (2006; Jmamm)	272m	-24.9769	31.6234	0.103972	0.384268	0.0174244	0.458626	0	0.0119031	0	0.0166356	0.00717051	231.808
KF0159	Faeces	Loxodonta africana	-26.6898	4.19701	47.9127	0.880154	54.4367	4.095	June	2002	Dry	Kruger Park	South	Granite	Maroela Loop	J Codron et al (2006; Jmamm)	272m	-24.9769	31.6234	0.103972	0.384268	0.0174244	0.458626	0	0.0119031	0	0.0166356	0.00717051	231.808
KF0160	Faeces	Loxodonta africana	-27.0267	5.86831	45.951	1.131	40.6287	1.83436	June	2002	Dry	Kruger Park	South	Granite	Maroela Loop	J Codron et al (2006; Jmamm)	272m	-24.9769	31.6234	0.103972	0.384268	0.0174244	0.458626	0	0.0119031	0	0.0166356	0.00717051	231.808
KF0161	Faeces	Loxodonta africana	-26.4411	4.02923	48.2473	0.955404	50.4993	5.76446	June	2002	Dry	Kruger Park	South	Granite	Maroela Loop	J Codron et al (2006; Jmamm)	272m	-24.9769	31.6234	0.103972	0.384268	0.0174244	0.458626	0	0.0119031	0	0.0166356	0.00717051	231.808
KF0162	Faeces	Loxodonta africana	-26.3433	5.32032	49.7987	1.49368	33.3397	6.42062	June	2002	Dry	Kruger Park	South	Granite	Maroela Loop	J Codron et al (2006; Jmamm)	272m	-24.9769	31.6234	0.103972	0.384268	0.0174244	0.458626	0	0.0119031	0	0.0166356	0.00717051	231.808
KF0163	Faeces	Loxodonta africana	-26.892	2.95196	50.0797	0.960034	52.1645	2.7385	June	2002	Dry	Kruger Park	South	Granite	Maroela Loop	J Codron et al (2006; Jmamm)	272m	-24.9769	31.6234	0.103972	0.384268	0.0174244	0.458626	0	0.0119031	0	0.0166356	0.00717051	231.808
KF0164	Faeces	Loxodonta africana	-26.9738	4.58081	44.8669	0.882522	50.8394	2.1896	June	2002	Dry	Kruger Park	South	Granite	Maroela Loop	J Codron et al (2006; Jmamm)	272m	-24.9769	31.6234	0.103972	0.384268	0.0174244	0.458626	0	0.0119031	0	0.0166356	0.00717051	231.808
KF0165	Faeces	Loxodonta africana	-25.2985	5.22328	44.8859	1.06679	42.0755	13.4328	June	2002	Dry	Kruger Park	South	Granite	Maroela Loop	J Codron et al (2006; Jmamm)	272m	-24.9769	31.6234	0.103972	0.384268	0.0174244	0.458626	0	0.0119031	0	0.0166356	0.00717051	231.808
KF0166	Faeces	Loxodonta africana	-26.7945	6.52746	46.8012	1.32819	35.2369	3.39252	June	2002	Dry	Kruger Park	South	Granite	Maroela Loop	J Codron et al (2006; Jmamm)	272m	-24.9769	31.6234	0.103972	0.384268	0.0174244	0.458626	0	0.0119031	0	0.0166356	0.00717051	231.808
KF0167	Faeces	Loxodonta africana	-25.8645	5.27133	46.0349	0.875075	52.6069	9.63438	June	2002	Dry	Kruger Park	South	Granite	Maroela Loop	J Codron et al (2006; Jmamm)	272m	-24.9769	31.6234	0.103972	0.384268	0.0174244	0.458626	0	0.0119031	0	0.0166356	0.00717051	231.808
KF0168	Faeces	Loxodonta africana	-26.3027	4.91945	37.5932	0.829854	45.3009	6.69344	June	2002	Dry	Kruger Park	South	Granite	Maroela Loop	J Codron et al (2006; Jmamm)	272m	-24.9769	31.6234	0.103972	0.384268	0.0174244	0.458626	0	0.0119031	0	0.0166356	0.00717051	231.808
KF0169	Faeces	Loxodonta africana	-26.447	5.4687	43.036	1.07308	40.1051	5.72455	June	2002	Dry	Kruger Park	South	Granite	Maroela Loop	J Codron et al (2006; Jmamm)	272m	-24.9769	31.6234	0.103972	0.384268	0.0174244	0.458626	0	0.0119031	0	0.0166356	0.00717051	231.808
KF0170	Faeces	Loxodonta africana	-26.4414	3.45445	47.2904	0.991683	47.687	5.76224	June	2002	Dry	Kruger Park	South	Granite	Maroela Loop	J Codron et al (2006; Jmamm)	272m	-24.9769	31.6234	0.103972	0.384268	0.0174244	0.458626	0	0.0119031	0	0.0166356	0.00717051	231.808
KF0171	Faeces	Loxodonta africana	-26.3944	5.37794	43.7271	0.877963	49.8051	6.07798	June	2002	Dry	Kruger Park	South	Granite	Maroela Loop	J Codron et al (2006; Jmamm)	272m	-24.9769	31.6234	0.103972	0.384268	0.0174244	0.458626	0	0.0119031	0	0.0166356	0.00717051	231.808
KF0172	Faeces	Loxodonta africana	-26.8959	3.93292	42.9058	0.985976	43.516	2.71206	June	2002	Dry	Kruger Park	South	Granite	Maroela Loop	J Codron et al (2006; Jmamm)	272m	-24.9769	31.6234	0.103972	0.384268	0.0174244	0.458626	0	0.0119031	0	0.0166356	0.00717051	231.808
KF0173	Faeces	Loxodonta africana	-25.0859	6.54681	39.5946	1.34533	29.4311	14.8598	June	2002	Dry	Kruger Park	South	Granite	Salitje Road	J Codron et al (2006; Jmamm)		-24.9513	31.7218	0.0976187	0.36035	0.0233109	0.481423	0	0.0190073	0	0.0142734	0.00401664	235.583
KF0174	Faeces	Loxodonta africana	-26.3854	4.61229	42.3483	1.16577	36.3264	6.13831	June	2002	Dry	Kruger Park	South	Granite	Salitje Road	J Codron et al (2006; Jmamm)		-24.9513	31.7218	0.0976187	0.36035	0.0233109	0.481423	0	0.0190073	0	0.0142734	0.00401664	235.583
KF0175	Faeces	Loxodonta africana	-26.5672	5.06041	38.2244	0.950144	40.2301	4.91799	June	2002	Dry	Kruger Park	South	Granite	Salitje Road	J Codron et al (2006; Jmamm)		-24.9513	31.7218	0.0976187	0.36035	0.0233109	0.481423	0	0.0190073	0	0.0142734	0.00401664	235.583
KF0176	Faeces	Loxodonta africana	-26.0528	6.13259	42.9792	1.15006	37.3712	8.37074	June	2002	Dry	Kruger Park	South	Granite	Salitje Road	J Codron et al (2006; Jmamm)		-24.9513	31.7218	0.0976187	0.36035	0.0233109	0.481423	0	0.0190073	0	0.0142734	0.00401664	235.583
KF0177	Faeces	Loxodonta africana	-26.885	3.74644	45.0123	1.13565	39.6356	2.78493	June	2002	Dry	Kruger Park	South	Basalt	S128	J Codron et al (2006; Jmamm)		-25.0741	31.9041	0.00136318	0.0471373	0.91785	0.033649	0	0	0	0	0	386.799
KF0178	Faeces	Loxodonta africana	-26.285	3.04357	48.8572	1.09864	44.4707	6.81185	June	2002	Dry	Kruger Park	South	Basalt	S128	J Codron et al (2006; Jmamm)		-25.0741	31.9041	0.00136318	0.0471373	0.91785	0.033649	0	0	0	0	0	386.799
KF0179	Faeces	Loxodonta africana	-25.9289	1.77272	48.6325	1.21505	40.025	9.20212	June	2002	Dry	Kruger Park	South	Basalt	S128	J Codron et al (2006; Jmamm)		-25.0741	31.9041	0.00136318	0.0471373	0.91785	0.033649	0	0	0	0	0	386.799
KF0180	Faeces	Loxodonta africana	-26.391	2.31849	46.7805	1.03087	45.3798	6.10072	June	2002	Dry	Kruger Park	South	Basalt	S128	J Codron et al (2006; Jmamm)		-25.0741	31.9041	0.00136318	0.0471373	0.91785	0.033649	0	0	0	0	0	386.799
KF0181	Faeces	Loxodonta africana	-25.8641	1.90572	46.7996	0.786786	59.4821	9.63708	June	2002	Dry	Kruger Park	South	Basalt	S128	J Codron et al (2006; Jmamm)		-25.0667	31.898	0.00157831	0.0731042	0.902002	0.0232441	7.17412e-05	0	0	0	0	382.553
KF0182	Faeces	Loxodonta africana	-25.9202	3.57639	42.8199	1.18007	36.2858	9.26015	June	2002	Dry	Kruger Park	South	Basalt	S128	J Codron et al (2006; Jmamm)		-25.0938	31.9128	0.0367157	0.21384	0.654213	0.0875583	0	0.0041592	0	0.000717103	0.0027967	334.392
KF0183	Faeces	Loxodonta africana	-25.4823	2.20563	36.712	0.909451	40.3672	12.1994	June	2002	Dry	Kruger Park	South	Basalt	S128	J Codron et al (2006; Jmamm)		-25.0938	31.9128	0.0367157	0.21384	0.654213	0.0875583	0	0.0041592	0	0.000717103	0.0027967	334.392
KF0184	Faeces	Loxodonta africana	-26.9617	6.15901	44.9887	1.7959	25.0508	2.27034	June	2002	Dry	Kruger Park	South	Basalt	Crocodile River	J Codron et al (2006; Jmamm)	251m	-25.3418	31.9405	0.113909	0.0639122	0.51969	0.0522201	0.23786	0.00215193	0.00150635	0.00681443	0.00193673	247.715
KF0185	Faeces	Loxodonta africana	-25.2908	4.42704	42.6328	1.15006	37.07	13.4848	June	2002	Dry	Kruger Park	South	Basalt	Crocodile River	J Codron et al (2006; Jmamm)	251m	-25.3418	31.9405	0.113909	0.0639122	0.51969	0.0522201	0.23786	0.00215193	0.00150635	0.00681443	0.00193673	247.715
KF0186	Faeces	Loxodonta africana	-25.8244	3.02886	45.0199	1.13401	39.6995	9.90311	June	2002	Dry	Kruger Park	South	Basalt	Crocodile River	J Codron et al (2006; Jmamm)	251m	-25.3418	31.9405	0.113909	0.0639122	0.51969	0.0522201	0.23786	0.00215193	0.00150635	0.00681443	0.00193673	247.715
KF0187	Faeces	Loxodonta africana	-26.0542	4.14954	47.3017	0.995978	47.4927	8.36087	June	2002	Dry	Kruger Park	South	Granite	Renosterkoppies	J Codron et al (2006; Jmamm)	282m	-25.072	31.6105	0.0642524	0.560488	0.00501972	0.348153	0	0.00394407	0	0.0181427	0	224.977
KF0188	Faeces	Loxodonta africana	-26.503	4.83886	43.5159	1.12392	38.718	5.34907	June	2002	Dry	Kruger Park	South	Granite	Renosterkoppies	J Codron et al (2006; Jmamm)	282m	-25.072	31.6105	0.0642524	0.560488	0.00501972	0.348153	0	0.00394407	0	0.0181427	0	224.977
KF0189	Faeces	Loxodonta africana	-25.8603	4.49335	45.6766	1.06332	42.9568	9.66218	June	2002	Dry	Kruger Park	South	Granite	Renosterkoppies	J Codron et al (2006; Jmamm)	282m	-25.072	31.6105	0.0642524	0.560488	0.00501972	0.348153	0	0.00394407	0	0.0181427	0	224.977
KF0190	Faeces	Loxodonta africana	-25.9575	4.83792	43.0953	1.37419	31.3605	9.01005	June	2002	Dry	Kruger Park	South	Granite	Renosterkoppies	J Codron et al (2006; Jmamm)	282m	-25.072	31.6105	0.0642524	0.560488	0.00501972	0.348153	0	0.00394407	0	0.0181427	0	224.977
KF0191	Faeces	Loxodonta africana	-26.4272	6.65535	46.6388	1.26548	36.8545	5.8578	June	2002	Dry	Kruger Park	South	Granite	Renosterkoppies	J Codron et al (2006; Jmamm)	282m	-25.072	31.6105	0.0642524	0.560488	0.00501972	0.348153	0	0.00394407	0	0.0181427	0	224.977
KF0192	Faeces	Loxodonta africana	-25.8634	6.60817	42.9703	1.43674	29.9081	9.64177	June	2002	Dry	Kruger Park	South	Granite	N'watimvambu R	J Codron et al (2006; Jmamm)	214m	-25.0173	31.7822	0.0434658	0.30132	0.067996	0.548702	0	0.015421	0	0.017788	0.0053077	256.419
KF0193	Faeces	Loxodonta africana	-26.5515	4.84139	44.8134	1.09006	41.1108	5.02369	June	2002	Dry	Kruger Park	South	Granite	N'watimvambu R	J Codron et al (2006; Jmamm)	214m	-25.0173	31.7822	0.0434658	0.30132	0.067996	0.548702	0	0.015421	0	0.017788	0.0053077	256.419
KF0194	Faeces	Loxodonta africana	-26.5928	5.75972	44.7824	1.38563	32.3191	4.74645	June	2002	Dry	Kruger Park	South	Granite	N'watimvambu R	J Codron et al (2006; Jmamm)	214m	-25.0173	31.7822	0.0434658	0.30132	0.067996	0.548702	0	0.015421	0	0.017788	0.0053077	256.419
KF0195	Faeces	Loxodonta africana	-26.2771	5.85749	40.7419	1.41849	28.7221	6.86507	June	2002	Dry	Kruger Park	South	Granite	N'watimvambu R	J Codron et al (2006; Jmamm)	214m	-25.0173	31.7822	0.0434658	0.30132	0.067996	0.548702	0	0.015421	0	0.017788	0.0053077	256.419
KF0196	Faeces	Loxodonta africana	-25.5388	5.81951	42.8321	1.21704	35.1937	11.8201	June	2002	Dry	Kruger Park	South	Granite	N'watimvambu R	J Codron et al (2006; Jmamm)	214m	-25.0173	31.7822	0.0434658	0.30132	0.067996	0.548702	0	0.015421	0	0.017788	0.0053077	256.419
KF0312	Faeces	Loxodonta africana	-21.7036	3.60122	41.2943	1.25587	32.881	41.4028	January	2003	Wet	Kruger Park	South	Basalt	Crocodile River	J Codron et al (2006; Jmamm)	251m	-25.3418	31.9405	0.113909	0.0639122	0.51969	0.0522201	0.23786	0.00215193	0.00150635	0.00681443	0.00193673	247.715
KF0329	Faeces	Loxodonta africana	-25.8505	7.70627	57.1322	1.66892	34.233	11.7823	January	2003	Wet	Kruger Park	South	Granite	Renosterkoppies	J Codron et al (2006; Jmamm)	282m	-25.072	31.6105	0.0642524	0.560488	0.00501972	0.348153	0	0.00394407	0	0.0181427	0	224.977
KF0342	Faeces	Loxodonta africana	-19.7732	4.65214	42.4453	1.37928	30.7735	55.1915	January	2003	Wet	Kruger Park	South	Granite	N'watimvambu R	J Codron et al (2006; Jmamm)	214m	-25.0173	31.7822	0.0434658	0.30132	0.067996	0.548702	0	0.015421	0	0.017788	0.0053077	256.419
KF0343	Faeces	Loxodonta africana	-21.5336	6.9714	50.8037	2.5964	19.567	42.6172	January	2003	Wet	Kruger Park	South	Granite	N'watimvambu R	J Codron et al (2006; Jmamm)	214m	-25.0173	31.7822	0.0434658	0.30132	0.067996	0.548702	0	0.015421	0	0.017788	0.0053077	256.419
KF0344	Faeces	Loxodonta africana	-22.4427	7.91129	66.9422	2.54662	26.2867	36.1234	January	2003	Wet	Kruger Park	South	Granite	N'watimvambu R	J Codron et al (2006; Jmamm)	214m	-25.0173	31.7822	0.0434658	0.30132	0.067996	0.548702	0	0.015421	0	0.017788	0.0053077	256.419
KF0345	Faeces	Loxodonta africana	-21.7314	8.28127	43.0655	1.83323	23.4916	41.2041	January	2003	Wet	Kruger Park	South	Granite	N'watimvambu R	J Codron et al (2006; Jmamm)	214m	-25.0173	31.7822	0.0434658	0.30132	0.067996	0.548702	0	0.015421	0	0.017788	0.0053077	256.419
KF0346	Faeces	Loxodonta africana	-21.4516	6.33523	63.0483	1.53696	41.0213	43.2027	January	2003	Wet	Kruger Park	South	Granite	N'watimvambu R	J Codron et al (2006; Jmamm)	214m	-25.0173	31.7822	0.0434658	0.30132	0.067996	0.548702	0	0.015421	0	0.017788	0.0053077	256.419
KF0347	Faeces	Loxodonta africana	-20.2211	5.78825	43.2461	1.33909	32.2951	51.9923	January	2003	Wet	Kruger Park	South	Granite	N'watimvambu R	J Codron et al (2006; Jmamm)	214m	-25.0173	31.7822	0.0434658	0.30132	0.067996	0.548702	0	0.015421	0	0.017788	0.0053077	256.419
KF0348	Faeces	Loxodonta africana	-22.0412	7.4471	63.3535	1.96428	32.2527	38.9916	January	2003	Wet	Kruger Park	South	Granite	N'watimvambu R	J Codron et al (2006; Jmamm)	214m	-25.0173	31.7822	0.0434658	0.30132	0.067996	0.548702	0	0.015421	0	0.017788	0.0053077	256.419
KF0349	Faeces	Loxodonta africana	-20.8246	5.61919	43.0703	1.1275	38.1998	47.6815	January	2003	Wet	Kruger Park	South	Granite	N'watimvambu R	J Codron et al (2006; Jmamm)	214m	-25.0173	31.7822	0.0434658	0.30132	0.067996	0.548702	0	0.015421	0	0.017788	0.0053077	256.419
KF0350	Faeces	Loxodonta africana	-23.9225	6.77358	66.978	1.92731	34.752	25.5537	January	2003	Wet	Kruger Park	South	Granite	N'watimvambu R	J Codron et al (2006; Jmamm)	214m	-25.0173	31.7822	0.0434658	0.30132	0.067996	0.548702	0	0.015421	0	0.017788	0.0053077	256.419
KF0351	Faeces	Loxodonta africana	-22.598	7.64941	61.2259	1.81996	33.6414	35.014	January	2003	Wet	Kruger Park	South	Granite	N'watimvambu R	J Codron et al (2006; Jmamm)	214m	-25.0173	31.7822	0.0434658	0.30132	0.067996	0.548702	0	0.015421	0	0.017788	0.0053077	256.419
KF0558	Faeces	Loxodonta africana	-25.7399	3.14256	44.6342	1.50204	29.7158	10.4704	June	2003	Dry	Kruger Park	South	Granite	Salitje Road	J Codron et al (2006; Jmamm)		-25.0741	31.9041	0.00136318	0.0471373	0.91785	0.033649	0	0	0	0	0	386.799
KF0559	Faeces	Loxodonta africana	-22.3034	2.67029	43.4135	1.08594	39.9778	33.534	June	2003	Dry	Kruger Park	South	Granite	Salitje Road	J Codron et al (2006; Jmamm)		-25.0543	31.888	0.0232475	0.302217	0.631915	0.0421181	7.17515e-05	0.000358757	0	7.17515e-05	0	328.17
KF0560	Faeces	Loxodonta africana	-25.4595	3.08838	46.7948	1.28634	36.3784	12.3524	June	2003	Dry	Kruger Park	South	Granite	Salitje Road	J Codron et al (2006; Jmamm)		-25.0159	31.8682	0.0255179	0.441689	0.445058	0.0877356	0	0	0	0	0	295.233
KF0646	Faeces	Loxodonta africana	-27.3838	2.48051	46.9055	0.782316	59.9572	0.231571	June	2003	Dry	Kruger Park	South	Granite	Renosterkoppies	J Codron et al (2006; Jmamm)	282m	-25.072	31.6105	0.0642524	0.560488	0.00501972	0.348153	0	0.00394407	0	0.0181427	0	224.977
KF0647	Faeces	Loxodonta africana	-27.0675	4.44527	46.2763	1.35448	34.1654	1.56067	June	2003	Dry	Kruger Park	South	Granite	Renosterkoppies	J Codron et al (2006; Jmamm)	282m	-25.072	31.6105	0.0642524	0.560488	0.00501972	0.348153	0	0.00394407	0	0.0181427	0	224.977
KF0648	Faeces	Loxodonta africana	-27.0801	3.41389	47.1271	1.24282	37.9195	1.47578	June	2003	Dry	Kruger Park	South	Granite	Renosterkoppies	J Codron et al (2006; Jmamm)	282m	-25.072	31.6105	0.0642524	0.560488	0.00501972	0.348153	0	0.00394407	0	0.0181427	0	224.977
KF0649	Faeces	Loxodonta africana	-25.6652	3.65881	41.5747	1.25819	33.0433	10.9715	June	2003	Dry	Kruger Park	South	Granite	Renosterkoppies	J Codron et al (2006; Jmamm)	282m	-25.072	31.6105	0.0642524	0.560488	0.00501972	0.348153	0	0.00394407	0	0.0181427	0	224.977
KF0650	Faeces	Loxodonta africana	-26.5311	4.64504	46.4713	1.33844	34.7204	5.16018	June	2003	Dry	Kruger Park	South	Granite	Renosterkoppies	J Codron et al (2006; Jmamm)	282m	-25.072	31.6105	0.0642524	0.560488	0.00501972	0.348153	0	0.00394407	0	0.0181427	0	224.977
KF0662	Faeces	Loxodonta africana	-25.5269	3.53116	40.3468	1.15492	34.9347	11.9003	June	2003	Dry	Kruger Park	South	Granite	N'watimvambu R	J Codron et al (2006; Jmamm)	214m	-25.0173	31.7822	0.0434658	0.30132	0.067996	0.548702	0	0.015421	0	0.017788	0.0053077	256.419
KF0663	Faeces	Loxodonta africana	-19.0156	3.28587	39.6812	1.15994	34.2096	55.6003	June	2003	Dry	Kruger Park	South	Granite	N'watimvambu R	J Codron et al (2006; Jmamm)	214m	-25.0173	31.7822	0.0434658	0.30132	0.067996	0.548702	0	0.015421	0	0.017788	0.0053077	256.419
KF0664	Faeces	Loxodonta africana	-27.7339	3.56404	43.8923	1.32083	33.2308	0.231571	June	2003	Dry	Kruger Park	South	Granite	N'watimvambu R	J Codron et al (2006; Jmamm)	214m	-25.0173	31.7822	0.0434658	0.30132	0.067996	0.548702	0	0.015421	0	0.017788	0.0053077	256.419
KF0713	Faeces	Loxodonta africana	-25.3893	4.23063	36.7802	1.58472	23.2094	12.8236	June	2003	Dry	Kruger Park	South	Basalt	Kruger Memorial Tablets	J Codron et al (2006; Jmamm)		-24.8298	31.8331	0.0479265	0.177931	0.523246	0.245659	0	0.000358732	0	0.00373081	0.00114794	323.375
KF0714	Faeces	Loxodonta africana	-27.1271	3.49875	34.7859	1.22318	28.439	1.16008	June	2003	Dry	Kruger Park	South	Basalt	Kruger Memorial Tablets	J Codron et al (2006; Jmamm)		-24.8298	31.8331	0.0479265	0.177931	0.523246	0.245659	0	0.000358732	0	0.00373081	0.00114794	323.375
KF0715	Faeces	Loxodonta africana	-24.4222	5.16013	32.6621	1.28302	25.4572	19.3139	June	2003	Dry	Kruger Park	South	Basalt	Leeupan	J Codron et al (2006; Jmamm)		-24.8447	31.8078	0.0685649	0.204332	0.351933	0.349638	0	0.000143441	0	0.0253891	0	293.387
KF0954	Faeces	Loxodonta africana	-18.8534	4.85046	36.47	2.0859	17.484	61.7611	February	2004	Wet	Kruger Park	South	Basalt	Crocodile River	J Codron et al (2006; Jmamm)	251m	-25.3418	31.9405	0.113909	0.0639122	0.51969	0.0522201	0.23786	0.00215193	0.00150635	0.00681443	0.00193673	247.715
KF1080	Faeces	Loxodonta africana	-25.1552	5.76213	43.5862	1.74076	25.0387	25.2549	June	2004	Dry	Kruger Park	South	Basalt	Hlanganzwane	J Codron et al (2011; Oecologia)	238m	-25.2367	31.9857	0.0339214	0.180795	0.704317	0.0759466	0	0	0	0	0.00502008	344.062
KF1091	Faeces	Loxodonta africana	-24.744	5.8815	44.3286	1.89853	23.349	28.0316	June	2004	Dry	Kruger Park	South	Basalt	Crocodile River	J Codron et al (2011; Oecologia)	251m	-25.3418	31.9405	0.113909	0.0639122	0.51969	0.0522201	0.23786	0.00215193	0.00150635	0.00681443	0.00193673	247.715
KF1115	Faeces	Loxodonta africana	-26.578	6.17944	46.157	1.38426	33.3441	11.9213	June	2004	Dry	Kruger Park	South	Granite	N'watimvambu R	J Codron et al (2011; Oecologia)	214m	-25.0173	31.7822	0.0434658	0.30132	0.067996	0.548702	0	0.015421	0	0.017788	0.0053077	256.419

## Sheet: 4km_buffer
Sample_ID	Material	Species	d13C	d15N	%C	%N	C/N	%C4	Month	Year	Season	Reserve	Part	Geology	Site_Name	FirstPublication	Elevation	latitude	longitude	CDW%	ODW%	CG%	DG%	AG%	BU%	CCW%	BA%	WA%	grassiness index
JF0011	Faeces	Loxodonta africana	-20.791	3.44475	42.7931	2.67528	15.9957	47.9212	February	2004	Wet	Kruger Park	South	Basalt	S28	J Codron et al (2011; Oecologia)	238m	-25.2367	31.9857	0.0254755	0.144445	0.761953	0.066871	0	0	0	0	0.00125495	356.279
JF0012	Faeces	Loxodonta africana	-19.3327	3.0284	44.8998	2.15894	20.7971	58.3376	February	2004	Wet	Kruger Park	South	Basalt	Crocodile River	J Codron et al (2011; Oecologia)	179m	-25.3268	31.9232	0.101124	0.0492356	0.69385	0.0326564	0.114369	0.00225835	0.000609395	0.00345922	0.00243758	307.297
JF0013	Faeces	Loxodonta africana	-18.5495	3.05066	44.8711	2.18778	20.5099	63.932	February	2004	Wet	Kruger Park	South	Basalt	Crocodile River	J Codron et al (2011; Oecologia)	179m	-25.3268	31.9232	0.101124	0.0492356	0.69385	0.0326564	0.114369	0.00225835	0.000609395	0.00345922	0.00243758	307.297
JF0014	Faeces	Loxodonta africana	-21.1821	5.51135	44.6849	2.21843	20.1426	45.1275	February	2004	Wet	Kruger Park	South	Basalt	Crocodile River	J Codron et al (2011; Oecologia)	179m	-25.3268	31.9232	0.101124	0.0492356	0.69385	0.0326564	0.114369	0.00225835	0.000609395	0.00345922	0.00243758	307.297
JF0015	Faeces	Loxodonta africana	-18.8046	0.320819	43.367	1.73561	24.9866	62.1101	February	2004	Wet	Kruger Park	South	Basalt	Crocodile River	J Codron et al (2011; Oecologia)	179m	-25.3268	31.9232	0.101124	0.0492356	0.69385	0.0326564	0.114369	0.00225835	0.000609395	0.00345922	0.00243758	307.297
JF0016	Faeces	Loxodonta africana	-20.2618	5.14155	47.2449	2.20459	21.4303	51.5731	February	2004	Wet	Kruger Park	South	Basalt	Crocodile River	J Codron et al (2011; Oecologia)	179m	-25.3268	31.9232	0.101124	0.0492356	0.69385	0.0326564	0.114369	0.00225835	0.000609395	0.00345922	0.00243758	307.297
JF0017	Faeces	Loxodonta africana	-16.8176	5.3462	43.8243	2.32313	18.8643	75.7436	February	2004	Wet	Kruger Park	South	Basalt	Crocodile River	J Codron et al (2011; Oecologia)	179m	-25.3268	31.9232	0.101124	0.0492356	0.69385	0.0326564	0.114369	0.00225835	0.000609395	0.00345922	0.00243758	307.297
JF0018	Faeces	Loxodonta africana	-18.8414	3.54675	40.9742	2.55918	16.0106	61.5409	February	2004	Wet	Kruger Park	South	Basalt	Crocodile River	J Codron et al (2011; Oecologia)	179m	-25.3268	31.9232	0.101124	0.0492356	0.69385	0.0326564	0.114369	0.00225835	0.000609395	0.00345922	0.00243758	307.297
JF0019	Faeces	Loxodonta africana	-18.1846	4.52627	41.298	2.20222	18.7529	66.1503	February	2004	Wet	Kruger Park	South	Basalt	Crocodile River	J Codron et al (2011; Oecologia)	179m	-25.3268	31.9232	0.101124	0.0492356	0.69385	0.0326564	0.114369	0.00225835	0.000609395	0.00345922	0.00243758	307.297
JF0020	Faeces	Loxodonta africana	-19.4146	4.87508	36.836	2.14282	17.1904	57.5185	February	2004	Wet	Kruger Park	South	Basalt	Crocodile River	J Codron et al (2011; Oecologia)	179m	-25.3268	31.9232	0.101124	0.0492356	0.69385	0.0326564	0.114369	0.00225835	0.000609395	0.00345922	0.00243758	307.297
JF0021	Faeces	Loxodonta africana	-18.6253	4.95868	42.4148	1.5129	28.0354	63.3908	February	2004	Wet	Kruger Park	South	Granite	H1-1	J Codron et al (2011; Oecologia)	308m	-25.0458	31.589	0.05501	0.623405	0.0228103	0.292216	0	0.00263403	0	0.00392417	0	226.971
JF0022	Faeces	Loxodonta africana	-18.0283	5.68939	34.9551	1.28276	27.2499	67.6551	February	2004	Wet	Kruger Park	South	Granite	Renosterkoppies	J Codron et al (2011; Oecologia)	282m	-25.072	31.6105	0.0674407	0.660467	0.0100158	0.254856	3.58346e-05	0.00172006	0	0.00542894	3.58346e-05	219.301
JF0023	Faeces	Loxodonta africana	-17.3437	5.02099	44.4724	1.28188	34.6931	72.5453	February	2004	Wet	Kruger Park	South	Granite	Renosterkoppies	J Codron et al (2011; Oecologia)	282m	-25.072	31.6105	0.0674407	0.660467	0.0100158	0.254856	3.58346e-05	0.00172006	0	0.00542894	3.58346e-05	219.301
JF0024	Faeces	Loxodonta africana	-19.0607	5.72945	39.4064	1.82809	21.556	60.2807	February	2004	Wet	Kruger Park	South	Granite	Renosterkoppies	J Codron et al (2011; Oecologia)	282m	-25.072	31.6105	0.0674407	0.660467	0.0100158	0.254856	3.58346e-05	0.00172006	0	0.00542894	3.58346e-05	219.301
JF0025	Faeces	Loxodonta africana	-23.8803	3.96695	45.1485	2.77887	16.2471	25.8553	February	2004	Wet	Kruger Park	South	Granite	Maroela Loop	J Codron et al (2011; Oecologia)	255m	-24.9397	31.6699	0.089762	0.472039	0.0372096	0.36093	0	0.00772512	0	0.0292157	0.00311873	226.547
JF0026	Faeces	Loxodonta africana	-21.8332	5.39426	44.4336	2.20064	20.1912	40.9689	February	2004	Wet	Kruger Park	South	Granite	Maroela Loop	J Codron et al (2011; Oecologia)	255m	-24.9397	31.6699	0.089762	0.472039	0.0372096	0.36093	0	0.00772512	0	0.0292157	0.00311873	226.547
JF0027	Faeces	Loxodonta africana	-22.2904	6.17927	50.6401	2.172	23.3149	37.7371	February	2004	Wet	Kruger Park	South	Granite	Maroela Loop	J Codron et al (2011; Oecologia)	255m	-24.9397	31.6699	0.089762	0.472039	0.0372096	0.36093	0	0.00772512	0	0.0292157	0.00311873	226.547
JF0028	Faeces	Loxodonta africana	-20.2876	4.58108	32.6685	1.88058	17.3715	51.8926	February	2004	Wet	Kruger Park	South Central	Granite	S36	J Codron et al (2011; Oecologia)	272m	-24.8727	31.7563	0.0240186	0.0865567	0.571608	0.306327	0	0.00100376	0	0.0104678	1.79244e-05	340.255
JF0029	Faeces	Loxodonta africana	-21.0626	3.99131	44.4594	2.35926	18.8446	46.4152	February	2004	Wet	Kruger Park	South Central	Granite	S36	J Codron et al (2011; Oecologia)	374m	-24.8019	31.6897	0.00831616	0.114652	0.378708	0.491299	0	7.1691e-05	0	0.00695403	0	322.635
JF0030	Faeces	Loxodonta africana	-20.4754	4.02625	41.1808	2.0085	20.5033	50.5648	February	2004	Wet	Kruger Park	South Central	Granite	S36	J Codron et al (2011; Oecologia)	374m	-24.8019	31.6897	0.00831616	0.114652	0.378708	0.491299	0	7.1691e-05	0	0.00695403	0	322.635
JF0031	Faeces	Loxodonta africana	-19.8368	5.05254	26.7305	1.79721	14.8733	55.0784	February	2004	Wet	Kruger Park	South Central	Granite	S36	J Codron et al (2011; Oecologia)	374m	-24.8019	31.6897	0.00831616	0.114652	0.378708	0.491299	0	7.1691e-05	0	0.00695403	0	322.635
JF0032	Faeces	Loxodonta africana	-20.639	3.95496	44.0085	2.69961	16.3018	49.4087	February	2004	Wet	Kruger Park	South Central	Granite	S36	J Codron et al (2011; Oecologia)	374m	-24.8019	31.6897	0.00831616	0.114652	0.378708	0.491299	0	7.1691e-05	0	0.00695403	0	322.635
JF0033	Faeces	Loxodonta africana	-20.5632	3.62633	44.2708	2.3736	18.6514	49.9442	February	2004	Wet	Kruger Park	South Central	Granite	S36	J Codron et al (2011; Oecologia)	374m	-24.8019	31.6897	0.00831616	0.114652	0.378708	0.491299	0	7.1691e-05	0	0.00695403	0	322.635
JF0034	Faeces	Loxodonta africana	-21.7672	5.53699	47.5969	2.42532	19.625	41.0091	February	2004	Wet	Kruger Park	South Central	Basalt	Tshokwane	J Codron et al (2011; Oecologia)	258m	-24.811	31.8859	0.0517949	0.0375468	0.748517	0.158055	0	0.000806495	0	0.000949872	0.00232987	359.512
JF0035	Faeces	Loxodonta africana	-22.1135	5.98215	46.7517	2.75771	16.953	38.5784	February	2004	Wet	Kruger Park	South Central	Basalt	Tshokwane	J Codron et al (2011; Oecologia)	258m	-24.811	31.8859	0.0517949	0.0375468	0.748517	0.158055	0	0.000806495	0	0.000949872	0.00232987	359.512
JF0036	Faeces	Loxodonta africana	-22.554	7.18339	47.3113	2.20453	21.4609	35.4876	February	2004	Wet	Kruger Park	South Central	Basalt	Tshokwane	J Codron et al (2011; Oecologia)	258m	-24.811	31.8859	0.0517949	0.0375468	0.748517	0.158055	0	0.000806495	0	0.000949872	0.00232987	359.512
JF0037	Faeces	Loxodonta africana	-22.6049	6.55862	45.913	2.76191	16.6236	35.1304	February	2004	Wet	Kruger Park	South Central	Basalt	Tshokwane	J Codron et al (2011; Oecologia)	258m	-24.811	31.8859	0.0517949	0.0375468	0.748517	0.158055	0	0.000806495	0	0.000949872	0.00232987	359.512
JF0038	Faeces	Loxodonta africana	-21.8362	6.57883	45.954	2.46514	18.6416	40.5246	February	2004	Wet	Kruger Park	South Central	Basalt	Tshokwane	J Codron et al (2011; Oecologia)	258m	-24.811	31.8859	0.0517949	0.0375468	0.748517	0.158055	0	0.000806495	0	0.000949872	0.00232987	359.512
JF0039	Faeces	Loxodonta africana	-22.7696	5.31847	45.8096	3.02533	15.142	33.9746	February	2004	Wet	Kruger Park	South Central	Basalt	Tshokwane	J Codron et al (2011; Oecologia)	258m	-24.811	31.8859	0.0517949	0.0375468	0.748517	0.158055	0	0.000806495	0	0.000949872	0.00232987	359.512
JF0040	Faeces	Loxodonta africana	-20.5851	3.74057	43.1829	2.35508	18.336	49.3041	February	2004	Wet	Kruger Park	South Central	Basalt	Rietpan	J Codron et al (2011; Oecologia)	300m	-24.9027	31.915	0.0290606	0.00880244	0.782162	0.179634	1.79276e-05	0.000268914	0	0	5.37827e-05	371.422
JF0041	Faeces	Loxodonta africana	-20.8857	1.30513	44.5187	2.26313	19.6714	47.1949	February	2004	Wet	Kruger Park	South Central	Basalt	Rietpan	J Codron et al (2011; Oecologia)	300m	-24.9027	31.915	0.0290606	0.00880244	0.782162	0.179634	1.79276e-05	0.000268914	0	0	5.37827e-05	371.422
JF0042	Faeces	Loxodonta africana	-20.0309	4.85191	43.5762	3.06354	14.2241	53.1936	February	2004	Wet	Kruger Park	South Central	Basalt	Mlondozi	J Codron et al (2011; Oecologia)	278m	-24.9301	31.9148	0.0211694	0.0221553	0.733079	0.223095	5.3775e-05	0.00039435	0	0	5.3775e-05	366.708
JF0043	Faeces	Loxodonta africana	-20.2976	3.70496	44.6716	3.48524	12.8173	51.3219	February	2004	Wet	Kruger Park	South Central	Basalt	Mlondozi	J Codron et al (2011; Oecologia)	278m	-24.9301	31.9148	0.0211694	0.0221553	0.733079	0.223095	5.3775e-05	0.00039435	0	0	5.3775e-05	366.708
JF0044	Faeces	Loxodonta africana	-19.1874	4.48942	22.361	1.04465	21.4053	59.1126	February	2004	Wet	Kruger Park	South Central	Basalt	H1-10	J Codron et al (2011; Oecologia)	340m	-24.7649	31.7282	0.0292863	0.0545399	0.285066	0.586873	0	0.00125462	0	0.0429795	0	303.925
JF0051	Faeces	Loxodonta africana	-20.7846	5.80353	42.602	2.37378	17.9469	47.9103	February	2004	Wet	Kruger Park	North Central	Granite	Shikumbu	J Codron et al (2011; Oecologia)	394m	-23.9195	31.2315	0.00433552	0.205865	0.130657	0.637411	1.79154e-05	0.0161597	0	0.00413845	0.00141531	285.093
JF0055	Faeces	Loxodonta africana	-15.9735	4.15674	39.0688	1.59141	24.5499	79.7468	February	2004	Wet	Kruger Park	North Central	Basalt	Letaba	J Codron et al (2011; Oecologia)	266m	-23.8626	31.5591	0.0636483	0.141618	0.336094	0.43568	3.58481e-05	0.00876485	0	0.0129949	0.00116506	299.83
JF0056	Faeces	Loxodonta africana	-18.6288	0.784479	43.2901	1.84969	23.4039	60.2326	February	2004	Wet	Kruger Park	North Central	Basalt	Letaba	J Codron et al (2011; Oecologia)	259m	-23.8453	31.5717	0.0668722	0.119943	0.4281	0.338197	0.000179234	0.0175829	0	0.02339	0.00573549	303.375
JF0057	Faeces	Loxodonta africana	-19.0863	5.36966	43.5984	2.40424	18.1339	56.8703	February	2004	Wet	Kruger Park	North Central	Basalt	Letaba	J Codron et al (2011; Oecologia)	259m	-23.8453	31.5717	0.0668722	0.119943	0.4281	0.338197	0.000179234	0.0175829	0	0.02339	0.00573549	303.375
JF0058	Faeces	Loxodonta africana	-18.9795	3.19903	43.7359	1.44252	30.3192	57.6552	February	2004	Wet	Kruger Park	North Central	Basalt	Letaba	J Codron et al (2011; Oecologia)	271m	-23.7996	31.5807	0.0633603	0.150541	0.505001	0.238834	0	0.0128872	0	0.0280148	0.0013622	310.095
JF0059	Faeces	Loxodonta africana	-19.3528	1.52002	40.4067	2.16328	18.6784	54.9113	February	2004	Wet	Kruger Park	North Central	Basalt	Letaba	J Codron et al (2011; Oecologia)	271m	-23.7996	31.5807	0.0633603	0.150541	0.505001	0.238834	0	0.0128872	0	0.0280148	0.0013622	310.095
JF0060	Faeces	Loxodonta africana	-20.4263	5.7417	41.6914	2.04431	20.3938	47.0222	February	2004	Wet	Kruger Park	North Central	Basalt	Letaba	J Codron et al (2011; Oecologia)	271m	-23.7996	31.5807	0.0633603	0.150541	0.505001	0.238834	0	0.0128872	0	0.0280148	0.0013622	310.095
JF0061	Faeces	Loxodonta africana	-17.5965	7.09285	46.4706	1.8106	25.6659	67.8185	February	2004	Wet	Kruger Park	North Central	Basalt	Letaba	J Codron et al (2011; Oecologia)	271m	-23.7996	31.5807	0.0633603	0.150541	0.505001	0.238834	0	0.0128872	0	0.0280148	0.0013622	310.095
JF0062	Faeces	Loxodonta africana	-18.5291	5.71231	42.9869	2.00382	21.4525	60.9651	February	2004	Wet	Kruger Park	North Central	Basalt	Letaba	J Codron et al (2011; Oecologia)	271m	-23.7996	31.5807	0.0633603	0.150541	0.505001	0.238834	0	0.0128872	0	0.0280148	0.0013622	310.095
JF0063	Faeces	Loxodonta africana	-19.2092	4.31824	34.1068	2.27065	15.0207	55.967	February	2004	Wet	Kruger Park	North Central	Basalt	Letaba	J Codron et al (2011; Oecologia)	271m	-23.7996	31.5807	0.0633603	0.150541	0.505001	0.238834	0	0.0128872	0	0.0280148	0.0013622	310.095
JF0064	Faeces	Loxodonta africana	-22.6518	6.53434	45.7826	2.06263	22.1962	30.6662	February	2004	Wet	Kruger Park	North Central	Basalt	Letaba	J Codron et al (2011; Oecologia)	271m	-23.7996	31.5807	0.0633603	0.150541	0.505001	0.238834	0	0.0128872	0	0.0280148	0.0013622	310.095
JF0065	Faeces	Loxodonta africana	-19.52	6.41421	46.5727	1.67879	27.7419	53.6828	February	2004	Wet	Kruger Park	North Central	Basalt	Letaba	J Codron et al (2011; Oecologia)	271m	-23.7996	31.5807	0.0633603	0.150541	0.505001	0.238834	0	0.0128872	0	0.0280148	0.0013622	310.095
JF0101	Faeces	Loxodonta africana	-21.4123	3.05734	45.9054	2.14466	21.4045	43.9434	March	2004	Wet	Kruger Park	South	Granite	S3	J Codron et al (2011; Oecologia)		-25.1521	31.2024	0.159884	0.518199	0.016927	0.292649	0.000232858	0.0104965	3.58243e-05	0.00139715	0.000179122	214.194
JF0102	Faeces	Loxodonta africana	-20.2915	2.89791	38.5973	2.17313	17.7612	51.8649	March	2004	Wet	Kruger Park	South	Granite	S3	J Codron et al (2011; Oecologia)		-25.1521	31.2024	0.159884	0.518199	0.016927	0.292649	0.000232858	0.0104965	3.58243e-05	0.00139715	0.000179122	214.194
JF0103	Faeces	Loxodonta africana	-20.5214	3.57106	43.8559	1.2583	34.8534	50.2398	March	2004	Wet	Kruger Park	South	Granite	S3	J Codron et al (2011; Oecologia)		-25.1521	31.2024	0.159884	0.518199	0.016927	0.292649	0.000232858	0.0104965	3.58243e-05	0.00139715	0.000179122	214.194
JF0104	Faeces	Loxodonta africana	-20.3952	-0.298422	43.9631	2.22961	19.7178	51.132	March	2004	Wet	Kruger Park	South	Granite	S3	J Codron et al (2011; Oecologia)		-25.1521	31.2024	0.159884	0.518199	0.016927	0.292649	0.000232858	0.0104965	3.58243e-05	0.00139715	0.000179122	214.194
JF0105	Faeces	Loxodonta africana	-21.9912	1.20732	45.3195	1.98063	22.8814	39.852	March	2004	Wet	Kruger Park	South	Granite	S3	J Codron et al (2011; Oecologia)		-25.1521	31.2024	0.159884	0.518199	0.016927	0.292649	0.000232858	0.0104965	3.58243e-05	0.00139715	0.000179122	214.194
JF0106	Faeces	Loxodonta africana	-20.5244	4.68239	39.4688	2.29789	17.1761	50.2185	March	2004	Wet	Kruger Park	South	Granite	S3	J Codron et al (2011; Oecologia)		-25.1521	31.2024	0.159884	0.518199	0.016927	0.292649	0.000232858	0.0104965	3.58243e-05	0.00139715	0.000179122	214.194
JF0107	Faeces	Loxodonta africana	-21.358	4.21929	42.6014	2.38567	17.8572	44.3274	March	2004	Wet	Kruger Park	South	Granite	S3	J Codron et al (2011; Oecologia)		-25.1521	31.2024	0.159884	0.518199	0.016927	0.292649	0.000232858	0.0104965	3.58243e-05	0.00139715	0.000179122	214.194
JF0108	Faeces	Loxodonta africana	-22.8416	3.87458	35.981	1.47132	24.4549	33.8418	March	2004	Wet	Kruger Park	South	Granite	S3	J Codron et al (2011; Oecologia)		-25.1521	31.2024	0.159884	0.518199	0.016927	0.292649	0.000232858	0.0104965	3.58243e-05	0.00139715	0.000179122	214.194
JF0109	Faeces	Loxodonta africana	-19.3872	4.34248	46.6797	2.20242	21.1948	58.2558	March	2004	Wet	Kruger Park	South	Granite	S3	J Codron et al (2011; Oecologia)		-25.1064	31.2241	0.0458666	0.543914	0.00922708	0.396872	0.000179167	0.001505	1.79167e-05	0.00037625	0.0020425	236.122
JF0110	Faeces	Loxodonta africana	-19.2313	4.58411	47.2043	2.44942	19.2716	59.3579	March	2004	Wet	Kruger Park	South	Granite	S3	J Codron et al (2011; Oecologia)		-25.1064	31.2241	0.0458666	0.543914	0.00922708	0.396872	0.000179167	0.001505	1.79167e-05	0.00037625	0.0020425	236.122
JF0111	Faeces	Loxodonta africana	-19.2491	2.60369	41.1049	2.95022	13.9328	58.6798	March	2004	Wet	Kruger Park	South Central	Basalt	Tshokwane	J Codron et al (2011; Oecologia)	258m	-24.8018	31.8563	0.0243317	0.0728876	0.71137	0.187074	0	0.000591271	0	0.00345804	0.000286677	357.681
JF0112	Faeces	Loxodonta africana	-19.957	6.33916	44.4591	1.2421	35.7935	53.7125	March	2004	Wet	Kruger Park	South Central	Basalt	Tshokwane	J Codron et al (2011; Oecologia)	258m	-24.8018	31.8563	0.0243317	0.0728876	0.71137	0.187074	0	0.000591271	0	0.00345804	0.000286677	357.681
JF0113	Faeces	Loxodonta africana	-20.259	5.41877	43.7021	1.23528	35.3782	51.5927	March	2004	Wet	Kruger Park	South Central	Basalt	Tshokwane	J Codron et al (2011; Oecologia)	258m	-24.8018	31.8563	0.0243317	0.0728876	0.71137	0.187074	0	0.000591271	0	0.00345804	0.000286677	357.681
JF0114	Faeces	Loxodonta africana	-17.5116	4.01505	41.8828	2.09772	19.9659	70.8729	March	2004	Wet	Kruger Park	South Central	Basalt	Tshokwane	J Codron et al (2011; Oecologia)	258m	-24.8018	31.8563	0.0243317	0.0728876	0.71137	0.187074	0	0.000591271	0	0.00345804	0.000286677	357.681
JF0115	Faeces	Loxodonta africana	-16.8199	4.81571	42.744	2.18491	19.5633	75.7269	March	2004	Wet	Kruger Park	South Central	Basalt	Orpen Dam	J Codron et al (2011; Oecologia)		-24.7918	31.8911	0.0530815	0.0581531	0.606244	0.275622	0	0.0012903	0	0.00213258	0.00347664	342.123
JF0116	Faeces	Loxodonta africana	-18.1018	5.57884	34.5849	1.77108	19.5276	66.7315	March	2004	Wet	Kruger Park	South Central	Basalt	Orpen Dam	J Codron et al (2011; Oecologia)		-24.7918	31.8911	0.0530815	0.0581531	0.606244	0.275622	0	0.0012903	0	0.00213258	0.00347664	342.123
JF0117	Faeces	Loxodonta africana	-17.491	5.81122	39.365	1.79153	21.9729	71.0178	March	2004	Wet	Kruger Park	South Central	Basalt	Orpen Dam	J Codron et al (2011; Oecologia)		-24.7918	31.8911	0.0530815	0.0581531	0.606244	0.275622	0	0.0012903	0	0.00213258	0.00347664	342.123
JF0118	Faeces	Loxodonta africana	-20.2164	6.59518	44.3423	2.21175	20.0485	52.3958	March	2004	Wet	Kruger Park	South Central	Granite	Leeupan	J Codron et al (2011; Oecologia)		-24.8787	31.7667	0.0233375	0.111615	0.558631	0.297347	0	0.00102169	0	0.00803011	1.79244e-05	337.313
JF0119	Faeces	Loxodonta africana	-18.0039	0.886146	44.5142	1.57111	28.3329	68.033	March	2004	Wet	Kruger Park	South Central	Granite	Leeupan	J Codron et al (2011; Oecologia)		-24.8787	31.7667	0.0233375	0.111615	0.558631	0.297347	0	0.00102169	0	0.00803011	1.79244e-05	337.313
JF0120	Faeces	Loxodonta africana	-20.8508	6.18271	44.2151	1.97776	22.3562	47.9119	March	2004	Wet	Kruger Park	South Central	Granite	Leeupan	J Codron et al (2011; Oecologia)		-24.8787	31.7667	0.0233375	0.111615	0.558631	0.297347	0	0.00102169	0	0.00803011	1.79244e-05	337.313
JF0121	Faeces	Loxodonta africana	-18.4421	5.2216	43.64	1.84429	23.6622	64.9357	March	2004	Wet	Kruger Park	South Central	Granite	Leeupan	J Codron et al (2011; Oecologia)		-24.8787	31.7667	0.0233375	0.111615	0.558631	0.297347	0	0.00102169	0	0.00803011	1.79244e-05	337.313
JF0122	Faeces	Loxodonta africana	-17.6757	2.41114	42.0148	2.11119	19.901	70.3527	March	2004	Wet	Kruger Park	South Central	Granite	Leeupan	J Codron et al (2011; Oecologia)		-24.8787	31.7667	0.0233375	0.111615	0.558631	0.297347	0	0.00102169	0	0.00803011	1.79244e-05	337.313
JF0123	Faeces	Loxodonta africana	-16.6943	6.65572	44.532	2.06049	21.6124	77.2884	March	2004	Wet	Kruger Park	South Central	Granite	Leeupan	J Codron et al (2011; Oecologia)		-24.8787	31.7667	0.0233375	0.111615	0.558631	0.297347	0	0.00102169	0	0.00803011	1.79244e-05	337.313
JF0124	Faeces	Loxodonta africana	-16.8885	4.05167	40.9778	2.1014	19.5003	75.246	March	2004	Wet	Kruger Park	South	Basalt	Lower Sabie	J Codron et al (2011; Oecologia)		-25.0938	31.9128	0.0471139	0.24048	0.634594	0.0648734	0.000465941	0.00218634	0	0.000268812	0.0100177	326.107
JF0125	Faeces	Loxodonta africana	-17.205	2.06763	41.2543	2.10458	19.6022	73.0249	March	2004	Wet	Kruger Park	South	Basalt	S128	J Codron et al (2011; Oecologia)	201m	-25.0938	31.9128	0.0471139	0.24048	0.634594	0.0648734	0.000465941	0.00218634	0	0.000268812	0.0100177	326.107
JF0126	Faeces	Loxodonta africana	-19.2446	3.37466	40.4847	2.1839	18.5378	58.7115	March	2004	Wet	Kruger Park	South	Basalt	S128	J Codron et al (2011; Oecologia)	201m	-25.0938	31.9128	0.0471139	0.24048	0.634594	0.0648734	0.000465941	0.00218634	0	0.000268812	0.0100177	326.107
JF0127	Faeces	Loxodonta africana	-18.7902	3.28147	31.9195	1.7148	18.6141	61.9007	March	2004	Wet	Kruger Park	South	Basalt	S128	J Codron et al (2011; Oecologia)	201m	-25.0938	31.9128	0.0471139	0.24048	0.634594	0.0648734	0.000465941	0.00218634	0	0.000268812	0.0100177	326.107
JF0128	Faeces	Loxodonta africana	-22.7378	0.125188	44.3195	2.51725	17.6063	34.1976	March	2004	Wet	Kruger Park	South	Basalt	S128	J Codron et al (2011; Oecologia)	201m	-25.0938	31.9128	0.0471139	0.24048	0.634594	0.0648734	0.000465941	0.00218634	0	0.000268812	0.0100177	326.107
JF0129	Faeces	Loxodonta africana	-18.4489	2.95808	34.9707	1.8564	18.8379	64.2952	March	2004	Wet	Kruger Park	South	Basalt	S128	J Codron et al (2011; Oecologia)	201m	-25.0938	31.9128	0.0471139	0.24048	0.634594	0.0648734	0.000465941	0.00218634	0	0.000268812	0.0100177	326.107
JF0130	Faeces	Loxodonta africana	-19.9031	3.35889	38.3119	2.02026	18.9638	54.0902	March	2004	Wet	Kruger Park	South	Basalt	S128	J Codron et al (2011; Oecologia)	201m	-25.0938	31.9128	0.0471139	0.24048	0.634594	0.0648734	0.000465941	0.00218634	0	0.000268812	0.0100177	326.107
JF0131	Faeces	Loxodonta africana	-20.097	4.81012	46.9548	1.47237	31.8906	52.7297	March	2004	Wet	Kruger Park	South	Basalt	Salitje	J Codron et al (2011; Oecologia)	184m	-25.1133	31.9275	0.0490939	0.200857	0.665322	0.0713377	0.000501873	0.00279615	0	0.000448101	0.00964313	332.611
JF0132	Faeces	Loxodonta africana	-20.6468	5.06119	47.7715	1.81398	26.3351	48.8717	March	2004	Wet	Kruger Park	South	Basalt	Salitje	J Codron et al (2011; Oecologia)	184m	-25.1133	31.9275	0.0490939	0.200857	0.665322	0.0713377	0.000501873	0.00279615	0	0.000448101	0.00964313	332.611
JF0168	Faeces	Loxodonta africana	-21.8973	2.68053	45.8256	1.85096	24.7578	43.0152	April	2004	Dry	Kruger Park	North Central	Basalt	Letaba	J Codron et al (2011; Oecologia)	266m	-23.8626	31.5591	0.0636483	0.141618	0.336094	0.43568	3.58481e-05	0.00876485	0	0.0129949	0.00116506	299.83
JF0169	Faeces	Loxodonta africana	-23.5847	5.47618	45.305	1.78205	25.423	30.3623	April	2004	Dry	Kruger Park	North Central	Basalt	Letaba	J Codron et al (2011; Oecologia)	266m	-23.8626	31.5591	0.0636483	0.141618	0.336094	0.43568	3.58481e-05	0.00876485	0	0.0129949	0.00116506	299.83
JF0171	Faeces	Loxodonta africana	-20.7351	5.04908	43.8066	0.97441	44.957	51.7297	April	2004	Dry	Kruger Park	North Central	Basalt	Letaba	J Codron et al (2011; Oecologia)	266m	-23.8626	31.5591	0.0636483	0.141618	0.336094	0.43568	3.58481e-05	0.00876485	0	0.0129949	0.00116506	299.83
JF0176	Faeces	Loxodonta africana	-22.4684	5.50971	45.2511	2.07567	21.8007	39.7888	April	2004	Dry	Kruger Park	North Central	Granite	Vudogwa	J Codron et al (2011; Oecologia)	323m	-23.9468	31.2439	0.00766833	0.166177	0.164977	0.641309	1.79167e-05	0.0148171	0	0.00361916	0.00141542	292.385
JF0177	Faeces	Loxodonta africana	-22.9588	5.11355	45.3117	2.11583	21.4156	37.631	April	2004	Dry	Kruger Park	South	Granite	Albasini Rd	J Codron et al (2011; Oecologia)	483m	-25.0479	31.27	0.0313323	0.41359	0.0618226	0.484029	0	0.00458609	0	0.00207807	0.00256176	255.789
JF0178	Faeces	Loxodonta africana	-24.1696	4.79434	45.2705	1.91562	23.6323	29.0298	April	2004	Dry	Kruger Park	South	Granite	Doispane Rd	J Codron et al (2011; Oecologia)	326m	-25.0021	31.4834	0.0592674	0.49543	0.136958	0.286767	0.000627263	0.0134593	0	0.00544822	0.00204308	245.826
JF0179	Faeces	Loxodonta africana	-24.4738	6.36979	45.8265	1.57218	29.1485	26.8691	April	2004	Dry	Kruger Park	South	Granite	Sabie River	J Codron et al (2011; Oecologia)	282m	-24.9349	31.7017	0.0782535	0.463409	0.0219203	0.406162	0	0.00942771	0	0.0180847	0.00274228	231.124
JF0180	Faeces	Loxodonta africana	-26.549	7.20677	44.1058	1.7588	25.0772	12.1279	April	2004	Dry	Kruger Park	South	Granite	Sabie River	J Codron et al (2011; Oecologia)	282m	-24.9349	31.7017	0.0782535	0.463409	0.0219203	0.406162	0	0.00942771	0	0.0180847	0.00274228	231.124
JF0181	Faeces	Loxodonta africana	-24.67	6.65447	44.6196	1.82416	24.4603	25.4755	April	2004	Dry	Kruger Park	South	Granite	Sabie River	J Codron et al (2011; Oecologia)	282m	-24.9349	31.7017	0.0782535	0.463409	0.0219203	0.406162	0	0.00942771	0	0.0180847	0.00274228	231.124
JF0182	Faeces	Loxodonta africana	-22.6621	6.17588	43.6752	0.951108	45.9204	39.739	April	2004	Dry	Kruger Park	South Central	Granite	H1-2	J Codron et al (2011; Oecologia)	316m	-24.9089	31.7183	0.0282473	0.372574	0.145269	0.449322	0	0.000483932	0	0.00410446	0	270.244
JF0183	Faeces	Loxodonta africana	-22.6443	5.80275	43.331	1.8596	23.3012	39.8651	April	2004	Dry	Kruger Park	South Central	Granite	H1-2	J Codron et al (2011; Oecologia)	316m	-24.9089	31.7183	0.0282473	0.372574	0.145269	0.449322	0	0.000483932	0	0.00410446	0	270.244
JF0184	Faeces	Loxodonta africana	-22.8639	6.12472	45.5515	2.38826	19.0731	38.305	April	2004	Dry	Kruger Park	South Central	Granite	H1-2	J Codron et al (2011; Oecologia)	316m	-24.9089	31.7183	0.0282473	0.372574	0.145269	0.449322	0	0.000483932	0	0.00410446	0	270.244
JF0185	Faeces	Loxodonta africana	-22.7439	6.22969	43.6752	5.03293	8.67789	39.1575	April	2004	Dry	Kruger Park	South Central	Granite	H1-2	J Codron et al (2011; Oecologia)	316m	-24.9089	31.7183	0.0282473	0.372574	0.145269	0.449322	0	0.000483932	0	0.00410446	0	270.244
JF0186	Faeces	Loxodonta africana	-25.425	7.08188	43.1237	2.43847	17.6847	20.1122	April	2004	Dry	Kruger Park	South Central	Granite	H1-2	J Codron et al (2011; Oecologia)	316m	-24.9089	31.7183	0.0282473	0.372574	0.145269	0.449322	0	0.000483932	0	0.00410446	0	270.244
JF0187	Faeces	Loxodonta africana	-25.5613	6.94155	44.4153	1.81871	24.4214	19.144	April	2004	Dry	Kruger Park	South Central	Granite	H1-2	J Codron et al (2011; Oecologia)	316m	-24.9089	31.7183	0.0282473	0.372574	0.145269	0.449322	0	0.000483932	0	0.00410446	0	270.244
JF0188	Faeces	Loxodonta africana	-23.1536	5.56073	41.95	1.63703	25.6257	38.7693	April	2004	Dry	Kruger Park	South	Basalt	Mativuhlungu	J Codron et al (2011; Oecologia)	194m	-25.1323	31.9096	0.0632696	0.378883	0.463194	0.0804044	0.000681089	0.0028319	0	0.000466008	0.0102701	291.503
JF0189	Faeces	Loxodonta africana	-25.2995	5.88012	42.6122	1.36329	31.257	24.2807	April	2004	Dry	Kruger Park	South	Basalt	Mativuhlungu	J Codron et al (2011; Oecologia)	194m	-25.1323	31.9096	0.0632696	0.378883	0.463194	0.0804044	0.000681089	0.0028319	0	0.000466008	0.0102701	291.503
JF0190	Faeces	Loxodonta africana	-25.2139	6.23287	44.896	1.59758	28.1026	24.8591	April	2004	Dry	Kruger Park	South	Basalt	Mativuhlungu	J Codron et al (2011; Oecologia)	194m	-25.1323	31.9096	0.0632696	0.378883	0.463194	0.0804044	0.000681089	0.0028319	0	0.000466008	0.0102701	291.503
JF0191	Faeces	Loxodonta africana	-23.4389	5.67243	41.6482	1.73444	24.0125	36.8432	April	2004	Dry	Kruger Park	South	Basalt	Mativuhlungu	J Codron et al (2011; Oecologia)	194m	-25.1323	31.9096	0.0632696	0.378883	0.463194	0.0804044	0.000681089	0.0028319	0	0.000466008	0.0102701	291.503
JF0192	Faeces	Loxodonta africana	-18.8703	3.86624	44.1231	1.9139	23.0541	67.6893	April	2004	Dry	Kruger Park	South	Basalt	Mlondozi	J Codron et al (2011; Oecologia)	278m	-24.9301	31.9148	0.0211694	0.0221553	0.733079	0.223095	5.3775e-05	0.00039435	0	0	5.3775e-05	366.708
JF0193	Faeces	Loxodonta africana	-22.3915	5.18309	43.4798	1.13536	38.2959	43.9147	April	2004	Dry	Kruger Park	South Central	Basalt	Muntshe	J Codron et al (2011; Oecologia)	270m	-24.9271	31.9179	0.0243225	0.0182105	0.756291	0.200674	5.37711e-05	0.000394322	0	0	5.37711e-05	368.793
JF0194	Faeces	Loxodonta africana	-20.4832	5.19833	43.3054	1.7963	24.1081	56.7993	April	2004	Dry	Kruger Park	South Central	Basalt	Muntshe	J Codron et al (2011; Oecologia)	270m	-24.9271	31.9179	0.0243225	0.0182105	0.756291	0.200674	5.37711e-05	0.000394322	0	0	5.37711e-05	368.793
JF0195	Faeces	Loxodonta africana	-20.9252	5.26675	43.2176	2.14235	20.173	53.8149	April	2004	Dry	Kruger Park	South Central	Basalt	Muntshe	J Codron et al (2011; Oecologia)	270m	-24.9271	31.9179	0.0243225	0.0182105	0.756291	0.200674	5.37711e-05	0.000394322	0	0	5.37711e-05	368.793
JF0196	Faeces	Loxodonta africana	-19.0381	5.89397	43.4798	3.46618	12.544	66.5563	April	2004	Dry	Kruger Park	South Central	Basalt	Muntshe	J Codron et al (2011; Oecologia)	270m	-24.9271	31.9179	0.0243225	0.0182105	0.756291	0.200674	5.37711e-05	0.000394322	0	0	5.37711e-05	368.793
JF0197	Faeces	Loxodonta africana	-19.5842	4.87025	37.6616	1.3424	28.0554	62.8691	April	2004	Dry	Kruger Park	South Central	Basalt	Muntshe	J Codron et al (2011; Oecologia)	270m	-24.9271	31.9179	0.0243225	0.0182105	0.756291	0.200674	5.37711e-05	0.000394322	0	0	5.37711e-05	368.793
JF0198	Faeces	Loxodonta africana	-23.8022	2.87611	44.6959	2.00274	22.3174	34.3902	April	2004	Dry	Kruger Park	South	Basalt	Mlondozi	J Codron et al (2011; Oecologia)	278m	-24.9301	31.9148	0.0211694	0.0221553	0.733079	0.223095	5.3775e-05	0.00039435	0	0	5.3775e-05	366.708
JF0222	Faeces	Loxodonta africana	-22.9417	6.35715	47.3632	1.96433	24.1116	36.5162	May	2004	Dry	Kruger Park	North Central	Granite	Masorini	J Codron et al (2011; Oecologia)	421m	-23.9201	31.2686	0.0031704	0.0832005	0.173799	0.720826	1.79118e-05	0.0150997	0	0.00247183	0.00141504	302.724
JF0223	Faeces	Loxodonta africana	-22.2653	6.19905	46.0573	1.76891	26.0372	41.1933	May	2004	Dry	Kruger Park	North Central	Granite	Masorini	J Codron et al (2011; Oecologia)	421m	-23.9201	31.2686	0.0031704	0.0832005	0.173799	0.720826	1.79118e-05	0.0150997	0	0.00247183	0.00141504	302.724
JF0224	Faeces	Loxodonta africana	-21.8496	5.37753	58.7773	1.43484	40.9645	44.0674	May	2004	Dry	Kruger Park	North Central	Granite	Masorini	J Codron et al (2011; Oecologia)	421m	-23.9201	31.2686	0.0031704	0.0832005	0.173799	0.720826	1.79118e-05	0.0150997	0	0.00247183	0.00141504	302.724
JF0225	Faeces	Loxodonta africana	-21.5083	6.09805	44.2673	1.71018	25.8845	46.4273	May	2004	Dry	Kruger Park	North Central	Granite	Masorini	J Codron et al (2011; Oecologia)	421m	-23.9201	31.2686	0.0031704	0.0832005	0.173799	0.720826	1.79118e-05	0.0150997	0	0.00247183	0.00141504	302.724
JF0226	Faeces	Loxodonta africana	-24.5008	4.00465	46.464	1.85299	25.0751	25.7367	May	2004	Dry	Kruger Park	North Central	Granite	Erfplaas	J Codron et al (2011; Oecologia)	414m	-23.9213	31.3037	0.00111113	0.0999301	0.206921	0.672969	1.79215e-05	0.017796	0	0.00107529	0.000179215	304.756
JF0227	Faeces	Loxodonta africana	-22.0737	5.66956	57.1603	1.27893	44.6937	41.6922	May	2004	Dry	Kruger Park	North Central	Basalt	Letaba	J Codron et al (2011; Oecologia)	266m	-23.8626	31.5591	0.0636483	0.141618	0.336094	0.43568	3.58481e-05	0.00876485	0	0.0129949	0.00116506	299.83
JF0228	Faeces	Loxodonta africana	-23.0251	5.5435	44.6315	1.48207	30.1143	34.5585	May	2004	Dry	Kruger Park	North Central	Basalt	Letaba	J Codron et al (2011; Oecologia)	266m	-23.8626	31.5591	0.0636483	0.141618	0.336094	0.43568	3.58481e-05	0.00876485	0	0.0129949	0.00116506	299.83
JF0229	Faeces	Loxodonta africana	-24.0964	6.68766	49.6153	2.23887	22.1609	26.5252	May	2004	Dry	Kruger Park	North Central	Basalt	Letaba	J Codron et al (2011; Oecologia)	266m	-23.8626	31.5591	0.0636483	0.141618	0.336094	0.43568	3.58481e-05	0.00876485	0	0.0129949	0.00116506	299.83
JF0230	Faeces	Loxodonta africana	-21.9941	5.908	43.9795	1.78537	24.6333	42.2892	May	2004	Dry	Kruger Park	North Central	Basalt	Letaba	J Codron et al (2011; Oecologia)	266m	-23.8626	31.5591	0.0636483	0.141618	0.336094	0.43568	3.58481e-05	0.00876485	0	0.0129949	0.00116506	299.83
JF0231	Faeces	Loxodonta africana	-24.1345	6.63582	46.856	2.25552	20.774	26.2396	May	2004	Dry	Kruger Park	North Central	Basalt	Letaba	J Codron et al (2011; Oecologia)	266m	-23.8626	31.5591	0.0636483	0.141618	0.336094	0.43568	3.58481e-05	0.00876485	0	0.0129949	0.00116506	299.83
JF0232	Faeces	Loxodonta africana	-25.3455	7.80074	44.816	1.76853	25.3409	20.6765	May	2004	Dry	Kruger Park	South Central	Granite	Ngwenyeni	J Codron et al (2011; Oecologia)	329m	-24.6096	31.6691	0.0276593	0.382928	0.370344	0.205966	0	0.00509088	0	0.00801276	0	289.279
JF0233	Faeces	Loxodonta africana	-24.2122	4.40281	37.3804	1.73298	21.57	28.7272	May	2004	Dry	Kruger Park	South Central	Granite	Ngwenyeni	J Codron et al (2011; Oecologia)	329m	-24.6096	31.6691	0.0276593	0.382928	0.370344	0.205966	0	0.00509088	0	0.00801276	0	289.279
JF0234	Faeces	Loxodonta africana	-25.5828	5.73662	46.75	1.21444	38.4952	18.991	May	2004	Dry	Kruger Park	South Central	Granite	Ngwenyeni	J Codron et al (2011; Oecologia)	329m	-24.6096	31.6691	0.0276593	0.382928	0.370344	0.205966	0	0.00509088	0	0.00801276	0	289.279
JF0235	Faeces	Loxodonta africana	-25.7084	7.18105	44.4839	1.87161	23.7677	18.099	May	2004	Dry	Kruger Park	South Central	Granite	Nhlanguleni	J Codron et al (2011; Oecologia)	349m	-24.7099	31.6574	0.0150912	0.0789153	0.343514	0.532835	0	0.000179231	0	0.0293221	0.000143385	314.548
JF0236	Faeces	Loxodonta africana	-23.4309	5.60286	41.2869	1.52334	27.1029	34.2773	May	2004	Dry	Kruger Park	South Central	Granite	Lugmag	J Codron et al (2011; Oecologia)	342m	-24.7242	31.6665	0.0156816	0.109663	0.226872	0.618839	0	0.000232983	0	0.0285673	0.000143374	299.901
JF0237	Faeces	Loxodonta africana	-21.9495	6.66189	49.3666	1.61997	30.4737	46.8993	May	2004	Dry	Kruger Park	South Central	Basalt	Orpen Dam	J Codron et al (2011; Oecologia)		-24.7918	31.8911	0.0530815	0.0581531	0.606244	0.275622	0	0.0012903	0	0.00213258	0.00347664	342.123
JF0238	Faeces	Loxodonta africana	-18.2355	4.54589	49.7852	1.20259	41.3985	71.9754	May	2004	Dry	Kruger Park	South Central	Basalt	Orpen Dam	J Codron et al (2011; Oecologia)		-24.7918	31.8911	0.0530815	0.0581531	0.606244	0.275622	0	0.0012903	0	0.00213258	0.00347664	342.123
JF0239	Faeces	Loxodonta africana	-24.2406	6.80314	46.5849	1.59649	29.1796	31.4307	May	2004	Dry	Kruger Park	South Central	Basalt	Orpen Dam	J Codron et al (2011; Oecologia)		-24.7918	31.8911	0.0530815	0.0581531	0.606244	0.275622	0	0.0012903	0	0.00213258	0.00347664	342.123
JF0240	Faeces	Loxodonta africana	-24.1406	7.21599	47.2745	1.96186	24.0968	32.1054	May	2004	Dry	Kruger Park	South Central	Basalt	Orpen Dam	J Codron et al (2011; Oecologia)		-24.7918	31.8911	0.0530815	0.0581531	0.606244	0.275622	0	0.0012903	0	0.00213258	0.00347664	342.123
JF0241	Faeces	Loxodonta africana	-24.0941	6.94753	46.5523	1.92062	24.2381	32.4192	May	2004	Dry	Kruger Park	South Central	Basalt	Orpen Dam	J Codron et al (2011; Oecologia)		-24.7918	31.8911	0.0530815	0.0581531	0.606244	0.275622	0	0.0012903	0	0.00213258	0.00347664	342.123
JF0257	Faeces	Loxodonta africana	-25.7795	6.23717	54.5431	1.29717	42.0478	21.0403	May	2004	Dry	Kruger Park	South	Basalt	Mativuhlungu	J Codron et al (2011; Oecologia)	194m	-25.1323	31.9096	0.0632696	0.378883	0.463194	0.0804044	0.000681089	0.0028319	0	0.000466008	0.0102701	291.503
JF0258	Faeces	Loxodonta africana	-25.881	5.60085	45.5342	1.69334	26.8902	20.355	May	2004	Dry	Kruger Park	South	Basalt	Mativuhlungu	J Codron et al (2011; Oecologia)	194m	-25.1323	31.9096	0.0632696	0.378883	0.463194	0.0804044	0.000681089	0.0028319	0	0.000466008	0.0102701	291.503
JF0259	Faeces	Loxodonta africana	-22.3814	4.3246	55.0141	1.19708	45.9569	43.9833	May	2004	Dry	Kruger Park	South	Basalt	Mativuhlungu	J Codron et al (2011; Oecologia)	194m	-25.1323	31.9096	0.0632696	0.378883	0.463194	0.0804044	0.000681089	0.0028319	0	0.000466008	0.0102701	291.503
JF0260	Faeces	Loxodonta africana	-26.0405	6.1657	60.0905	1.56355	38.432	19.2782	May	2004	Dry	Kruger Park	South	Basalt	Mativuhlungu	J Codron et al (2011; Oecologia)	194m	-25.1323	31.9096	0.0632696	0.378883	0.463194	0.0804044	0.000681089	0.0028319	0	0.000466008	0.0102701	291.503
JF0261	Faeces	Loxodonta africana	-25.9717	6.26844	57.4522	1.48399	38.7147	19.7426	May	2004	Dry	Kruger Park	South	Basalt	Mativuhlungu	J Codron et al (2011; Oecologia)	194m	-25.1323	31.9096	0.0632696	0.378883	0.463194	0.0804044	0.000681089	0.0028319	0	0.000466008	0.0102701	291.503
JF0267	Faeces	Loxodonta africana	-26.3709	7.65924	57.7362	1.83555	31.4545	13.3931	May	2004	Dry	Kruger Park	South	Granite	Sabie River	J Codron et al (2011; Oecologia)	282m	-24.9349	31.7017	0.0782535	0.463409	0.0219203	0.406162	0	0.00942771	0	0.0180847	0.00274228	231.124
JF0268	Faeces	Loxodonta africana	-25.817	8.23437	59.9316	1.54667	38.7489	17.3274	May	2004	Dry	Kruger Park	South	Granite	Sabie River	J Codron et al (2011; Oecologia)	282m	-24.9349	31.7017	0.0782535	0.463409	0.0219203	0.406162	0	0.00942771	0	0.0180847	0.00274228	231.124
JF0269	Faeces	Loxodonta africana	-25.3908	7.83675	60.6913	1.39958	43.3638	20.3549	May	2004	Dry	Kruger Park	South	Granite	Sabie River	J Codron et al (2011; Oecologia)	282m	-24.9349	31.7017	0.0782535	0.463409	0.0219203	0.406162	0	0.00942771	0	0.0180847	0.00274228	231.124
JF0270	Faeces	Loxodonta africana	-26.7511	7.78335	49.6964	1.89902	26.1695	10.6919	May	2004	Dry	Kruger Park	South	Granite	Sabie River	J Codron et al (2011; Oecologia)	282m	-24.9349	31.7017	0.0782535	0.463409	0.0219203	0.406162	0	0.00942771	0	0.0180847	0.00274228	231.124
JF0271	Faeces	Loxodonta africana	-26.4097	7.01963	61.5293	1.42627	43.1399	13.1171	May	2004	Dry	Kruger Park	South	Granite	Sabie River	J Codron et al (2011; Oecologia)	282m	-24.9349	31.7017	0.0782535	0.463409	0.0219203	0.406162	0	0.00942771	0	0.0180847	0.00274228	231.124
JF0272	Faeces	Loxodonta africana	-25.4735	3.42916	44.4038	1.74973	25.3775	19.7676	June	2004	Dry	Kruger Park	South	Granite	Albasini Rd	J Codron et al (2011; Oecologia)	483m	-25.0479	31.27	0.0313323	0.41359	0.0618226	0.484029	0	0.00458609	0	0.00207807	0.00256176	255.789
JF0273	Faeces	Loxodonta africana	-25.0572	3.66653	42.7223	1.88969	22.6081	22.7249	June	2004	Dry	Kruger Park	South	Granite	Albasini Rd	J Codron et al (2011; Oecologia)	483m	-25.0479	31.27	0.0313323	0.41359	0.0618226	0.484029	0	0.00458609	0	0.00207807	0.00256176	255.789
JF0274	Faeces	Loxodonta africana	-25.3825	3.67196	44.9013	1.93826	23.1658	20.4141	June	2004	Dry	Kruger Park	South	Granite	Albasini Rd	J Codron et al (2011; Oecologia)	483m	-25.0479	31.27	0.0313323	0.41359	0.0618226	0.484029	0	0.00458609	0	0.00207807	0.00256176	255.789
JF0275	Faeces	Loxodonta africana	-25.533	3.84959	45.4232	2.02728	22.406	19.3451	June	2004	Dry	Kruger Park	South	Granite	Albasini Rd	J Codron et al (2011; Oecologia)	483m	-25.0479	31.27	0.0313323	0.41359	0.0618226	0.484029	0	0.00458609	0	0.00207807	0.00256176	255.789
JF0276	Faeces	Loxodonta africana	-26.6729	4.05205	47.1733	2.22838	21.1694	11.2478	June	2004	Dry	Kruger Park	South	Granite	Albasini Rd	J Codron et al (2011; Oecologia)	483m	-25.0479	31.27	0.0313323	0.41359	0.0618226	0.484029	0	0.00458609	0	0.00207807	0.00256176	255.789
JF0277	Faeces	Loxodonta africana	-27.2351	4.56246	46.1166	2.02123	22.8161	11.2119	June	2004	Dry	Kruger Park	South	Basalt	S29	J Codron et al (2011; Oecologia)	181m	-25.1342	31.9082	0.0652123	0.392385	0.450858	0.0776525	0.000681162	0.0027605	0	0.000466058	0.0099844	288.637
JF0278	Faeces	Loxodonta africana	-25.2978	3.76582	46.2904	1.75756	26.3379	24.2925	June	2004	Dry	Kruger Park	South	Basalt	S29	J Codron et al (2011; Oecologia)	181m	-25.1146	31.9309	0.0484215	0.188003	0.680823	0.0694143	0.000645381	0.0027608	0	0.000448181	0.00948352	335.596
JF0279	Faeces	Loxodonta africana	-25.8502	6.08826	46.6145	1.55208	30.0335	20.563	June	2004	Dry	Kruger Park	South	Basalt	S29	J Codron et al (2011; Oecologia)	181m	-25.0257	31.8797	0.0184246	0.34797	0.580249	0.0530872	0	0.000215073	0	1.79228e-05	3.58455e-05	319.462
JF0280	Faeces	Loxodonta africana	-25.5672	6.57385	46.6627	1.53527	30.3939	22.4734	June	2004	Dry	Kruger Park	South	Basalt	S29	J Codron et al (2011; Oecologia)	181m	-25.0217	31.8749	0.0177227	0.388951	0.535678	0.0574152	0	0.000215038	0	1.79199e-05	0	311.058
JF0281	Faeces	Loxodonta africana	-25.4312	1.48613	45.0451	1.89711	23.7441	23.3919	June	2004	Dry	Kruger Park	South	Basalt	S29	J Codron et al (2011; Oecologia)	181m	-25.0296	31.8938	0.0293902	0.235964	0.670024	0.0534578	0.00191753	8.96041e-05	1.79208e-05	1.79208e-05	0.0091217	334.179
JF0282	Faeces	Loxodonta africana	-24.7294	5.73992	46.106	1.98866	23.1844	25.0536	June	2004	Dry	Kruger Park	South Central	Granite	N'watindlopfu	J Codron et al (2011; Oecologia)		-24.9027	31.7536	0.0313956	0.270518	0.233102	0.456544	0	0.000913913	0	0.00750842	1.79199e-05	287.447
JF0283	Faeces	Loxodonta africana	-23.3343	7.93133	42.4483	2.16958	19.5652	34.9637	June	2004	Dry	Kruger Park	South Central	Granite	Leeupan	J Codron et al (2011; Oecologia)		-24.8554	31.7959	0.0497257	0.0850213	0.663213	0.191912	0	7.17026e-05	0	0.0100384	1.79256e-05	344.836
JF0285	Faeces	Loxodonta africana	-24.0597	7.21148	43.7082	1.28423	34.0345	29.8108	June	2004	Dry	Kruger Park	South Central	Granite	Leeupan	J Codron et al (2011; Oecologia)		-24.8508	31.7984	0.0481969	0.0992257	0.64287	0.199527	0	7.16949e-05	0	0.0100911	1.79237e-05	341.671
JF0286	Faeces	Loxodonta africana	-22.2205	6.5211	45.2375	1.72478	26.2279	42.8754	June	2004	Dry	Kruger Park	South Central	Granite	Leeupan	J Codron et al (2011; Oecologia)		-24.8379	31.8162	0.0426203	0.121857	0.54193	0.279846	0	0.000161305	0	0.0132987	0.000286764	329.359
JF0287	Faeces	Loxodonta africana	-25.1329	6.29925	36.4462	1.9322	18.8625	25.4059	June	2004	Dry	Kruger Park	South Central	Basalt	Tshokwane	J Codron et al (2011; Oecologia)	258m	-24.7982	31.8794	0.0467414	0.0566024	0.689036	0.200825	0	0.00132676	0	0.00261766	0.00285074	351.857
JF0288	Faeces	Loxodonta africana	-24.7346	5.94553	43.1193	1.93029	22.3382	28.095	June	2004	Dry	Kruger Park	South Central	Basalt	Tshokwane	J Codron et al (2011; Oecologia)	258m	-24.7982	31.8794	0.0467414	0.0566024	0.689036	0.200825	0	0.00132676	0	0.00261766	0.00285074	351.857
JF0289	Faeces	Loxodonta africana	-24.3951	4.92353	45.169	1.9092	23.6585	30.3871	June	2004	Dry	Kruger Park	South Central	Basalt	Tshokwane	J Codron et al (2011; Oecologia)	258m	-24.7982	31.8794	0.0467414	0.0566024	0.689036	0.200825	0	0.00132676	0	0.00261766	0.00285074	351.857
JF0290	Faeces	Loxodonta africana	-24.4153	6.39228	42.8668	1.72594	24.8368	30.2508	June	2004	Dry	Kruger Park	South Central	Basalt	Tshokwane	J Codron et al (2011; Oecologia)	258m	-24.7982	31.8794	0.0467414	0.0566024	0.689036	0.200825	0	0.00132676	0	0.00261766	0.00285074	351.857
JF0291	Faeces	Loxodonta africana	-25.305	6.25271	43.8281	1.81483	24.15	24.2438	June	2004	Dry	Kruger Park	South Central	Basalt	Tshokwane	J Codron et al (2011; Oecologia)	258m	-24.7996	31.8761	0.0454945	0.0559987	0.708552	0.182659	0	0.00136232	0	0.00308316	0.00285013	353.968
JF0292	Faeces	Loxodonta africana	-23.0486	5.39013	47.6069	1.71552	27.7508	35.777	June	2004	Dry	Kruger Park	North Central	Granite	Masorini	J Codron et al (2011; Oecologia)	421m	-23.9201	31.2686	0.0031704	0.0832005	0.173799	0.720826	1.79118e-05	0.0150997	0	0.00247183	0.00141504	302.724
JF0293	Faeces	Loxodonta africana	-22.2455	4.95653	50.3848	1.57865	31.9163	41.3301	June	2004	Dry	Kruger Park	North Central	Granite	Masorini	J Codron et al (2011; Oecologia)	421m	-23.9201	31.2686	0.0031704	0.0832005	0.173799	0.720826	1.79118e-05	0.0150997	0	0.00247183	0.00141504	302.724
JF0294	Faeces	Loxodonta africana	-23.1487	5.75704	48.1467	1.81676	26.5014	35.0854	June	2004	Dry	Kruger Park	North Central	Granite	Masorini	J Codron et al (2011; Oecologia)	421m	-23.9201	31.2686	0.0031704	0.0832005	0.173799	0.720826	1.79118e-05	0.0150997	0	0.00247183	0.00141504	302.724
JF0295	Faeces	Loxodonta africana	-22.79	5.56079	45.6072	2.04597	22.2912	37.5651	June	2004	Dry	Kruger Park	North Central	Granite	Erfplaas	J Codron et al (2011; Oecologia)	414m	-23.9213	31.3037	0.00111113	0.0999301	0.206921	0.672969	1.79215e-05	0.017796	0	0.00107529	0.000179215	304.756
JF0296	Faeces	Loxodonta africana	-19.2523	4.80913	42.6974	1.16388	36.6854	62.0252	June	2004	Dry	Kruger Park	North Central	Granite	Erfplaas	J Codron et al (2011; Oecologia)	414m	-23.9213	31.3037	0.00111113	0.0999301	0.206921	0.672969	1.79215e-05	0.017796	0	0.00107529	0.000179215	304.756
JF0302	Faeces	Loxodonta africana	-24.5375	5.57457	49.5396	1.85562	26.697	23.2178	June	2004	Dry	Kruger Park	North Central	Basalt	Letaba	J Codron et al (2011; Oecologia)	266m	-23.8626	31.5591	0.0636483	0.141618	0.336094	0.43568	3.58481e-05	0.00876485	0	0.0129949	0.00116506	299.83
JF0303	Faeces	Loxodonta africana	-23.6271	6.46603	47.7623	1.04705	45.616	30.044	June	2004	Dry	Kruger Park	North Central	Basalt	Letaba	J Codron et al (2011; Oecologia)	266m	-23.8626	31.5591	0.0636483	0.141618	0.336094	0.43568	3.58481e-05	0.00876485	0	0.0129949	0.00116506	299.83
JF0304	Faeces	Loxodonta africana	-24.0786	6.52731	44.4154	1.96918	22.5553	26.6588	June	2004	Dry	Kruger Park	North Central	Basalt	Letaba	J Codron et al (2011; Oecologia)	266m	-23.8626	31.5591	0.0636483	0.141618	0.336094	0.43568	3.58481e-05	0.00876485	0	0.0129949	0.00116506	299.83
JF0305	Faeces	Loxodonta africana	-24.0751	5.88808	46.2816	1.61792	28.6057	26.6847	June	2004	Dry	Kruger Park	North Central	Basalt	Letaba	J Codron et al (2011; Oecologia)	266m	-23.8626	31.5591	0.0636483	0.141618	0.336094	0.43568	3.58481e-05	0.00876485	0	0.0129949	0.00116506	299.83
JF0306	Faeces	Loxodonta africana	-22.8333	5.67947	39.309	0.893481	43.9954	35.9968	June	2004	Dry	Kruger Park	North Central	Basalt	Letaba	J Codron et al (2011; Oecologia)	266m	-23.8626	31.5591	0.0636483	0.141618	0.336094	0.43568	3.58481e-05	0.00876485	0	0.0129949	0.00116506	299.83
JF0332	Faeces	Loxodonta africana	-26.5305	6.11774	46.1794	1.49516	30.8859	12.2591	June	2004	Dry	Kruger Park	South	Granite	Maroela Loop	J Codron et al (2011; Oecologia)	255m	-24.9397	31.6699	0.089762	0.472039	0.0372096	0.36093	0	0.00772512	0	0.0292157	0.00311873	226.547
JF0333	Faeces	Loxodonta africana	-26.5809	5.87727	48.6638	1.69045	28.7875	11.9007	June	2004	Dry	Kruger Park	South	Granite	Maroela Loop	J Codron et al (2011; Oecologia)	255m	-24.9397	31.6699	0.089762	0.472039	0.0372096	0.36093	0	0.00772512	0	0.0292157	0.00311873	226.547
JF0334	Faeces	Loxodonta africana	-26.6035	6.22168	47.6246	1.51772	31.3791	11.7407	June	2004	Dry	Kruger Park	South	Granite	Maroela Loop	J Codron et al (2011; Oecologia)	255m	-24.9397	31.6699	0.089762	0.472039	0.0372096	0.36093	0	0.00772512	0	0.0292157	0.00311873	226.547
JF0335	Faeces	Loxodonta africana	-26.3322	5.9851	48.2338	1.75163	27.5365	13.6674	June	2004	Dry	Kruger Park	South	Granite	Maroela Loop	J Codron et al (2011; Oecologia)	255m	-24.9397	31.6699	0.089762	0.472039	0.0372096	0.36093	0	0.00772512	0	0.0292157	0.00311873	226.547
JF0336	Faeces	Loxodonta africana	-26.6305	7.91969	47.8738	1.96352	24.3816	11.5486	June	2004	Dry	Kruger Park	South	Granite	Maroela Loop	J Codron et al (2011; Oecologia)	255m	-24.9397	31.6699	0.089762	0.472039	0.0372096	0.36093	0	0.00772512	0	0.0292157	0.00311873	226.547
JF0337	Faeces	Loxodonta africana	-26.6665	2.1046	47.8526	2.00794	23.8317	15.0512	June	2004	Dry	Kruger Park	South	Basalt	Hlanganzwane	J Codron et al (2011; Oecologia)	238m	-25.2367	31.9857	0.0254755	0.144445	0.761953	0.066871	0	0	0	0	0.00125495	356.279
JF0338	Faeces	Loxodonta africana	-24.6368	5.08836	44.9069	1.59661	28.1263	28.7555	June	2004	Dry	Kruger Park	South	Basalt	Hlanganzwane	J Codron et al (2011; Oecologia)	238m	-25.2367	31.9857	0.0254755	0.144445	0.761953	0.066871	0	0	0	0	0.00125495	356.279
JF0339	Faeces	Loxodonta africana	-24.169	5.28286	46.6332	1.85684	25.1143	31.9141	June	2004	Dry	Kruger Park	South	Basalt	Hlanganzwane	J Codron et al (2011; Oecologia)	238m	-25.2367	31.9857	0.0254755	0.144445	0.761953	0.066871	0	0	0	0	0.00125495	356.279
JF0340	Faeces	Loxodonta africana	-27.4205	5.64414	47.5385	1.89943	25.0278	9.96049	June	2004	Dry	Kruger Park	South	Basalt	Hlanganzwane	J Codron et al (2011; Oecologia)	238m	-25.2367	31.9857	0.0254755	0.144445	0.761953	0.066871	0	0	0	0	0.00125495	356.279
JF0341	Faeces	Loxodonta africana	-24.6557	2.02065	45.1737	1.6548	27.2986	28.6276	June	2004	Dry	Kruger Park	South	Basalt	Hlanganzwane	J Codron et al (2011; Oecologia)	238m	-25.2367	31.9857	0.0254755	0.144445	0.761953	0.066871	0	0	0	0	0.00125495	356.279
JF0349	Faeces	Loxodonta africana	-19.9402	4.66733	38.6303	2.0918	18.4675	50.5944	March	2004	Wet	Kruger Park	North Central	Basalt	Letaba	J Codron et al (2011; Oecologia)	266m	-23.8626	31.5591	0.0636483	0.141618	0.336094	0.43568	3.58481e-05	0.00876485	0	0.0129949	0.00116506	299.83
JF0351	Faeces	Loxodonta africana	-25.4577	5.65055	41.0537	2.49584	16.4489	10.045	March	2004	Wet	Kruger Park	North Central	Basalt	Twisappel	J Codron et al (2011; Oecologia)		-23.7157	31.5418	0.0196061	0.0420796	0.682772	0.252245	0	0.00231187	0	0.000985681	0	359.159
JF0352	Faeces	Loxodonta africana	-18.3655	4.5885	45.4235	0.981507	46.2793	62.1677	March	2004	Wet	Kruger Park	North Central	Basalt	Twisappel	J Codron et al (2011; Oecologia)		-23.7157	31.5418	0.0196061	0.0420796	0.682772	0.252245	0	0.00231187	0	0.000985681	0	359.159
JF0364	Faeces	Loxodonta africana	-24.0209	1.70155	45.7751	2.06292	22.1895	20.6048	March	2004	Wet	Kruger Park	North Central	Basalt	Twisappel	J Codron et al (2011; Oecologia)		-23.7157	31.5418	0.0196061	0.0420796	0.682772	0.252245	0	0.00231187	0	0.000985681	0	359.159
JF0371	Faeces	Loxodonta africana	-22.7829	6.54509	43.2988	2.16915	19.9612	36.3747	April	2004	Dry	Kruger Park	North Central	Basalt	Letaba	J Codron et al (2011; Oecologia)	266m	-23.8626	31.5591	0.0636483	0.141618	0.336094	0.43568	3.58481e-05	0.00876485	0	0.0129949	0.00116506	299.83
JF0372	Faeces	Loxodonta africana	-22.4697	6.22938	41.6429	2.57495	16.1723	38.7229	April	2004	Dry	Kruger Park	North Central	Basalt	Letaba	J Codron et al (2011; Oecologia)	266m	-23.8626	31.5591	0.0636483	0.141618	0.336094	0.43568	3.58481e-05	0.00876485	0	0.0129949	0.00116506	299.83
JF0396	Faeces	Loxodonta africana	-20.1392	7.11927	44.2772	1.11162	39.8314	55.8934	July	2004	Dry	Kruger Park	North Central	Granite	Masorini	J Codron et al (2011; Oecologia)	421m	-23.9201	31.2686	0.0031704	0.0832005	0.173799	0.720826	1.79118e-05	0.0150997	0	0.00247183	0.00141504	302.724
JF0397	Faeces	Loxodonta africana	-23.0248	6.57837	46.3847	1.36044	34.0954	35.9419	July	2004	Dry	Kruger Park	North Central	Granite	Masorini	J Codron et al (2011; Oecologia)	421m	-23.9201	31.2686	0.0031704	0.0832005	0.173799	0.720826	1.79118e-05	0.0150997	0	0.00247183	0.00141504	302.724
JF0398	Faeces	Loxodonta africana	-24.1019	6.62458	50.9374	1.9703	25.8526	28.4947	July	2004	Dry	Kruger Park	North Central	Granite	Masorini	J Codron et al (2011; Oecologia)	421m	-23.9201	31.2686	0.0031704	0.0832005	0.173799	0.720826	1.79118e-05	0.0150997	0	0.00247183	0.00141504	302.724
JF0399	Faeces	Loxodonta africana	-24.1049	6.98705	50.9672	2.33772	21.8021	28.4738	July	2004	Dry	Kruger Park	North Central	Granite	Masorini	J Codron et al (2011; Oecologia)	421m	-23.9201	31.2686	0.0031704	0.0832005	0.173799	0.720826	1.79118e-05	0.0150997	0	0.00247183	0.00141504	302.724
JF0400	Faeces	Loxodonta africana	-21.4657	6.37601	46.047	1.29259	35.6239	46.7217	July	2004	Dry	Kruger Park	North Central	Granite	Masorini	J Codron et al (2011; Oecologia)	421m	-23.9201	31.2686	0.0031704	0.0832005	0.173799	0.720826	1.79118e-05	0.0150997	0	0.00247183	0.00141504	302.724
JF0401	Faeces	Loxodonta africana	-23.7264	6.96153	45.807	1.65303	27.711	31.0909	July	2004	Dry	Kruger Park	North Central	Granite	Masorini	J Codron et al (2011; Oecologia)	421m	-23.9201	31.2686	0.0031704	0.0832005	0.173799	0.720826	1.79118e-05	0.0150997	0	0.00247183	0.00141504	302.724
JF0402	Faeces	Loxodonta africana	-22.9218	4.58623	46.0627	1.38065	33.3632	36.654	July	2004	Dry	Kruger Park	North Central	Granite	Erfplaas	J Codron et al (2011; Oecologia)	414m	-23.9213	31.3037	0.00111113	0.0999301	0.206921	0.672969	1.79215e-05	0.017796	0	0.00107529	0.000179215	304.756
JF0403	Faeces	Loxodonta africana	-21.4223	7.65878	48.2968	1.69694	28.4611	46.5769	July	2004	Dry	Kruger Park	North Central	Basalt	Letaba	J Codron et al (2011; Oecologia)	266m	-23.8626	31.5591	0.0636483	0.141618	0.336094	0.43568	3.58481e-05	0.00876485	0	0.0129949	0.00116506	299.83
JF0404	Faeces	Loxodonta africana	-23.5714	7.21123	45.3366	1.36048	33.3239	30.4616	July	2004	Dry	Kruger Park	North Central	Basalt	Letaba	J Codron et al (2011; Oecologia)	266m	-23.8626	31.5591	0.0636483	0.141618	0.336094	0.43568	3.58481e-05	0.00876485	0	0.0129949	0.00116506	299.83
JF0405	Faeces	Loxodonta africana	-22.4985	6.64658	43.2309	1.72275	25.0941	38.5073	July	2004	Dry	Kruger Park	North Central	Basalt	Letaba	J Codron et al (2011; Oecologia)	266m	-23.8626	31.5591	0.0636483	0.141618	0.336094	0.43568	3.58481e-05	0.00876485	0	0.0129949	0.00116506	299.83
JF0406	Faeces	Loxodonta africana	-22.7082	5.48148	46.6356	1.45648	32.0194	36.9347	July	2004	Dry	Kruger Park	North Central	Basalt	Letaba	J Codron et al (2011; Oecologia)	266m	-23.8626	31.5591	0.0636483	0.141618	0.336094	0.43568	3.58481e-05	0.00876485	0	0.0129949	0.00116506	299.83
JF0407	Faeces	Loxodonta africana	-25.3737	8.32141	46.2151	1.59792	28.9221	16.9474	July	2004	Dry	Kruger Park	North Central	Basalt	Letaba	J Codron et al (2011; Oecologia)	266m	-23.8626	31.5591	0.0636483	0.141618	0.336094	0.43568	3.58481e-05	0.00876485	0	0.0129949	0.00116506	299.83
JF0408	Faeces	Loxodonta africana	-24.3539	7.61357	47.134	1.32644	35.534	24.5943	July	2004	Dry	Kruger Park	North Central	Basalt	Letaba	J Codron et al (2011; Oecologia)	266m	-23.8626	31.5591	0.0636483	0.141618	0.336094	0.43568	3.58481e-05	0.00876485	0	0.0129949	0.00116506	299.83
JF0409	Faeces	Loxodonta africana	-22.3646	7.17921	46.6228	1.04044	44.8106	39.5114	July	2004	Dry	Kruger Park	North Central	Basalt	Letaba Bridge	J Codron et al (2011; Oecologia)	232m	-23.8126	31.5825	0.0611883	0.153024	0.489327	0.249001	0	0.015324	0	0.0298952	0.00224034	307.155
JF0410	Faeces	Loxodonta africana	-22.0046	7.01099	47.8801	1.87314	25.5614	42.2105	July	2004	Dry	Kruger Park	North Central	Basalt	Letaba Bridge	J Codron et al (2011; Oecologia)	232m	-23.8126	31.5825	0.0611883	0.153024	0.489327	0.249001	0	0.015324	0	0.0298952	0.00224034	307.155
JF0411	Faeces	Loxodonta africana	-25.5492	6.69618	47.1398	1.70289	27.6823	15.6315	July	2004	Dry	Kruger Park	North Central	Basalt	Letaba Bridge	J Codron et al (2011; Oecologia)	232m	-23.8126	31.5825	0.0611883	0.153024	0.489327	0.249001	0	0.015324	0	0.0298952	0.00224034	307.155
JF0412	Faeces	Loxodonta africana	-25.2023	7.62939	48.4532	1.7309	27.993	18.2325	July	2004	Dry	Kruger Park	North Central	Basalt	Letaba Bridge	J Codron et al (2011; Oecologia)	232m	-23.8126	31.5825	0.0611883	0.153024	0.489327	0.249001	0	0.015324	0	0.0298952	0.00224034	307.155
JF0413	Faeces	Loxodonta africana	-24.1366	2.98546	37.524	0.8997	41.7073	29.2646	July	2004	Dry	Kruger Park	South Central	Granite	Mzandzeni	J Codron et al (2011; Oecologia)	368m	-24.4795	31.6313	0.00383526	0.276802	0.281139	0.427704	0	0.00526901	0	0.00505394	0.00019714	296.511
JF0414	Faeces	Loxodonta africana	-24.0129	7.18962	45.2737	1.38219	32.755	30.1428	July	2004	Dry	Kruger Park	South Central	Granite	Mzandzeni	J Codron et al (2011; Oecologia)	368m	-24.4795	31.6313	0.00383526	0.276802	0.281139	0.427704	0	0.00526901	0	0.00505394	0.00019714	296.511
JF0415	Faeces	Loxodonta africana	-25.3031	8.04188	46.5567	1.47214	31.6252	20.9781	July	2004	Dry	Kruger Park	South Central	Granite	Ngwenyeni	J Codron et al (2011; Oecologia)	329m	-24.6096	31.6691	0.0276593	0.382928	0.370344	0.205966	0	0.00509088	0	0.00801276	0	289.279
JF0416	Faeces	Loxodonta africana	-25.1833	7.05061	43.7311	1.52037	28.7635	21.8294	July	2004	Dry	Kruger Park	South Central	Granite	Ngwenyeni	J Codron et al (2011; Oecologia)	329m	-24.6096	31.6691	0.0276593	0.382928	0.370344	0.205966	0	0.00509088	0	0.00801276	0	289.279
JF0417	Faeces	Loxodonta africana	-24.6169	7.95735	46.3668	1.50071	30.8965	25.8522	July	2004	Dry	Kruger Park	South Central	Granite	Ngwenyeni	J Codron et al (2011; Oecologia)	329m	-24.6096	31.6691	0.0276593	0.382928	0.370344	0.205966	0	0.00509088	0	0.00801276	0	289.279
JF0418	Faeces	Loxodonta africana	-25.1578	6.35406	45.2705	1.17663	38.4746	22.0099	July	2004	Dry	Kruger Park	South Central	Granite	Ngwenyeni	J Codron et al (2011; Oecologia)	329m	-24.6096	31.6691	0.0276593	0.382928	0.370344	0.205966	0	0.00509088	0	0.00801276	0	289.279
JF0419	Faeces	Loxodonta africana	-24.578	7.9734	46.1398	1.40618	32.8122	26.1286	July	2004	Dry	Kruger Park	South Central	Granite	Ngwenyeni	J Codron et al (2011; Oecologia)	329m	-24.6096	31.6691	0.0276593	0.382928	0.370344	0.205966	0	0.00509088	0	0.00801276	0	289.279
JF0420	Faeces	Loxodonta africana	-24.758	6.9397	46.154	1.73887	26.5425	24.8503	July	2004	Dry	Kruger Park	South Central	Granite	Ngwenyeni	J Codron et al (2011; Oecologia)	329m	-24.6096	31.6691	0.0276593	0.382928	0.370344	0.205966	0	0.00509088	0	0.00801276	0	289.279
JF0421	Faeces	Loxodonta africana	-25.3527	8.21127	51.417	1.83196	28.0666	20.626	July	2004	Dry	Kruger Park	South Central	Granite	Ngwenyeni	J Codron et al (2011; Oecologia)	329m	-24.6096	31.6691	0.0276593	0.382928	0.370344	0.205966	0	0.00509088	0	0.00801276	0	289.279
JF0422	Faeces	Loxodonta africana	-25.7345	7.1574	47.9653	2.20684	21.7348	17.9137	July	2004	Dry	Kruger Park	South Central	Granite	Ngwenyeni	J Codron et al (2011; Oecologia)	329m	-24.6096	31.6691	0.0276593	0.382928	0.370344	0.205966	0	0.00509088	0	0.00801276	0	289.279
JF0423	Faeces	Loxodonta africana	-25.7092	4.96931	48.9385	1.17625	41.6055	21.515	July	2004	Dry	Kruger Park	South Central	Basalt	Satara	J Codron et al (2011; Oecologia)	266m	-24.6193	31.7938	0.0192528	0.318532	0.459612	0.194034	0	0.00582604	0	0.00274272	0	307.687
JF0424	Faeces	Loxodonta africana	-23.1281	7.91766	47.9081	1.43043	33.4921	38.9414	July	2004	Dry	Kruger Park	South Central	Basalt	N'wanetsi Bridge	J Codron et al (2011; Oecologia)	259m	-24.4196	31.7835	0.0317457	0.0332335	0.759137	0.161955	0	0.0111854	0	0.00270672	3.58506e-05	362.063
JF0425	Faeces	Loxodonta africana	-23.7895	7.00641	43.5343	1.43481	30.3415	34.4759	July	2004	Dry	Kruger Park	South Central	Basalt	N'wanetsi Bridge	J Codron et al (2011; Oecologia)	259m	-24.4196	31.7835	0.0317457	0.0332335	0.759137	0.161955	0	0.0111854	0	0.00270672	3.58506e-05	362.063
JF0426	Faeces	Loxodonta africana	-24.1323	7.23061	48.1955	1.957	24.6273	32.1615	July	2004	Dry	Kruger Park	South Central	Basalt	N'wanetsi Bridge	J Codron et al (2011; Oecologia)	259m	-24.4196	31.7835	0.0317457	0.0332335	0.759137	0.161955	0	0.0111854	0	0.00270672	3.58506e-05	362.063
JF0427	Faeces	Loxodonta africana	-24.7495	7.12028	44.2735	1.35609	32.648	27.9945	July	2004	Dry	Kruger Park	South Central	Basalt	Sweni	J Codron et al (2011; Oecologia)	262m	-24.4331	31.788	0.0222405	0.0284234	0.831162	0.10459	0	0.0109321	0	0.00261653	3.58429e-05	371.75
JF0428	Faeces	Loxodonta africana	-24.1225	3.44874	42.2837	1.21111	34.9131	32.2276	July	2004	Dry	Kruger Park	South Central	Basalt	N'wanetsi Bridge	J Codron et al (2011; Oecologia)	259m	-24.4196	31.7835	0.0317457	0.0332335	0.759137	0.161955	0	0.0111854	0	0.00270672	3.58506e-05	362.063
JF0429	Faeces	Loxodonta africana	-25.408	7.26164	44.7149	1.47772	30.2593	23.5484	July	2004	Dry	Kruger Park	South Central	Basalt	Sweni	J Codron et al (2011; Oecologia)	262m	-24.4331	31.788	0.0222405	0.0284234	0.831162	0.10459	0	0.0109321	0	0.00261653	3.58429e-05	371.75
JF0430	Faeces	Loxodonta africana	-25.978	3.39578	45.5134	1.392	32.6963	19.6996	July	2004	Dry	Kruger Park	South Central	Basalt	Satara	J Codron et al (2011; Oecologia)	266m	-24.6193	31.7938	0.0192528	0.318532	0.459612	0.194034	0	0.00582604	0	0.00274272	0	307.687
JF0431	Faeces	Loxodonta africana	-25.1508	7.08639	43.4483	1.43194	30.3423	25.285	July	2004	Dry	Kruger Park	South Central	Basalt	Satara	J Codron et al (2011; Oecologia)	266m	-24.6193	31.7938	0.0192528	0.318532	0.459612	0.194034	0	0.00582604	0	0.00274272	0	307.687
JF0432	Faeces	Loxodonta africana	-25.5086	7.47676	46.1107	0.979774	47.0626	22.869	July	2004	Dry	Kruger Park	South Central	Basalt	Satara	J Codron et al (2011; Oecologia)	266m	-24.6193	31.7938	0.0192528	0.318532	0.459612	0.194034	0	0.00582604	0	0.00274272	0	307.687
JF0433	Faeces	Loxodonta africana	-25.1286	7.81295	46.1299	1.26615	36.4332	22.2175	July	2004	Dry	Kruger Park	South	Granite	Sabie River	J Codron et al (2011; Oecologia)	282m	-24.9349	31.7017	0.0782535	0.463409	0.0219203	0.406162	0	0.00942771	0	0.0180847	0.00274228	231.124
JF0434	Faeces	Loxodonta africana	-23.9138	5.9808	44.4984	1.14794	38.7636	30.8471	July	2004	Dry	Kruger Park	South	Granite	Sabie River	J Codron et al (2011; Oecologia)	282m	-24.9349	31.7017	0.0782535	0.463409	0.0219203	0.406162	0	0.00942771	0	0.0180847	0.00274228	231.124
JF0435	Faeces	Loxodonta africana	-25.9009	7.51266	46.3662	1.33893	34.6293	16.7313	July	2004	Dry	Kruger Park	South	Granite	Sabie River	J Codron et al (2011; Oecologia)	282m	-24.9349	31.7017	0.0782535	0.463409	0.0219203	0.406162	0	0.00942771	0	0.0180847	0.00274228	231.124
JF0436	Faeces	Loxodonta africana	-26.3435	8.54324	45.8826	1.36421	33.6332	13.5876	July	2004	Dry	Kruger Park	South	Granite	Sabie River	J Codron et al (2011; Oecologia)	282m	-24.9349	31.7017	0.0782535	0.463409	0.0219203	0.406162	0	0.00942771	0	0.0180847	0.00274228	231.124
JF0437	Faeces	Loxodonta africana	-25.6669	8.54225	48.7074	1.53288	31.775	18.3936	July	2004	Dry	Kruger Park	South	Granite	Sabie River	J Codron et al (2011; Oecologia)	282m	-24.9349	31.7017	0.0782535	0.463409	0.0219203	0.406162	0	0.00942771	0	0.0180847	0.00274228	231.124
JF0438	Faeces	Loxodonta africana	-25.5291	8.54839	50.1006	1.37349	36.4769	19.3727	July	2004	Dry	Kruger Park	South	Granite	Sabie River	J Codron et al (2011; Oecologia)	282m	-24.9349	31.7017	0.0782535	0.463409	0.0219203	0.406162	0	0.00942771	0	0.0180847	0.00274228	231.124
JF0439	Faeces	Loxodonta africana	-26.0582	7.94729	48.2203	1.73186	27.843	15.6144	July	2004	Dry	Kruger Park	South	Granite	H1-1 Skukuza	J Codron et al (2011; Oecologia)	305m	-25.0129	31.5889	0.113917	0.587275	0.0266511	0.246581	5.37683e-05	0.0129761	0	0.00926606	0.00327986	213.481
JF0440	Faeces	Loxodonta africana	-26.216	8.76301	46.3526	1.77676	26.0883	14.4929	July	2004	Dry	Kruger Park	South	Granite	H1-1 Skukuza	J Codron et al (2011; Oecologia)	305m	-25.0129	31.5889	0.113917	0.587275	0.0266511	0.246581	5.37683e-05	0.0129761	0	0.00926606	0.00327986	213.481
JF0441	Faeces	Loxodonta africana	-25.7998	6.35592	48.3402	1.86266	25.9522	17.4494	July	2004	Dry	Kruger Park	South	Granite	H1-1 Skukuza	J Codron et al (2011; Oecologia)	305m	-25.0129	31.5889	0.113917	0.587275	0.0266511	0.246581	5.37683e-05	0.0129761	0	0.00926606	0.00327986	213.481
JF0442	Faeces	Loxodonta africana	-26.9899	5.19446	46.6349	1.71758	27.1516	8.99582	July	2004	Dry	Kruger Park	South	Granite	De Laporte	J Codron et al (2011; Oecologia)	308m	-25.0516	31.5755	0.0489462	0.630708	0.0364363	0.276866	0	0.00301097	0	0.00403255	0	228.671
JF0443	Faeces	Loxodonta africana	-24.5168	6.93034	47.6849	1.3823	34.4969	29.5657	July	2004	Dry	Kruger Park	South	Basalt	Lower Sabie	J Codron et al (2011; Oecologia)		-25.0938	31.9128	0.0471139	0.24048	0.634594	0.0648734	0.000465941	0.00218634	0	0.000268812	0.0100177	326.107
JF0444	Faeces	Loxodonta africana	-26.1412	4.47625	49.4748	1.94697	25.4112	18.5977	July	2004	Dry	Kruger Park	South	Basalt	Lower Sabie	J Codron et al (2011; Oecologia)		-25.0938	31.9128	0.0471139	0.24048	0.634594	0.0648734	0.000465941	0.00218634	0	0.000268812	0.0100177	326.107
JF0445	Faeces	Loxodonta africana	-25.744	6.74775	43.8821	1.67143	26.2543	21.2799	July	2004	Dry	Kruger Park	South	Basalt	Lower Sabie	J Codron et al (2011; Oecologia)		-25.0938	31.9128	0.0471139	0.24048	0.634594	0.0648734	0.000465941	0.00218634	0	0.000268812	0.0100177	326.107
JF0446	Faeces	Loxodonta africana	-26.6334	6.53453	47.3015	1.74262	27.1439	15.2747	July	2004	Dry	Kruger Park	South	Basalt	Lower Sabie	J Codron et al (2011; Oecologia)		-25.0938	31.9128	0.0471139	0.24048	0.634594	0.0648734	0.000465941	0.00218634	0	0.000268812	0.0100177	326.107
JF0447	Faeces	Loxodonta africana	-25.9293	7.41171	45.6524	1.63627	27.9003	20.0283	July	2004	Dry	Kruger Park	South	Basalt	Lower Sabie	J Codron et al (2011; Oecologia)		-25.0938	31.9128	0.0471139	0.24048	0.634594	0.0648734	0.000465941	0.00218634	0	0.000268812	0.0100177	326.107
JF0448	Faeces	Loxodonta africana	-26.4253	7.33533	46.5064	1.85041	25.133	16.6797	July	2004	Dry	Kruger Park	South	Basalt	Duke	J Codron et al (2011; Oecologia)	248m	-25.208	31.8907	0.172972	0.406506	0.363635	0.056833	0	5.37683e-05	0	0	0	261.102
JF0449	Faeces	Loxodonta africana	-25.8339	7.59048	49.55	1.55919	31.7794	20.673	July	2004	Dry	Kruger Park	South	Basalt	Duke	J Codron et al (2011; Oecologia)	248m	-25.208	31.8907	0.172972	0.406506	0.363635	0.056833	0	5.37683e-05	0	0	0	261.102
JF0450	Faeces	Loxodonta africana	-25.3709	4.83859	48.6607	1.61233	30.1803	23.7986	July	2004	Dry	Kruger Park	South	Basalt	Duke	J Codron et al (2011; Oecologia)	248m	-25.208	31.8907	0.172972	0.406506	0.363635	0.056833	0	5.37683e-05	0	0	0	261.102
JF0451	Faeces	Loxodonta africana	-26.0569	5.30487	48.2294	1.96872	24.4978	19.1674	July	2004	Dry	Kruger Park	South	Basalt	Hlanganzwane	J Codron et al (2011; Oecologia)	238m	-25.2367	31.9857	0.0254755	0.144445	0.761953	0.066871	0	0	0	0	0.00125495	356.279
JF0452	Faeces	Loxodonta africana	-25.6528	5.05735	46.6951	1.63907	28.4889	21.8956	July	2004	Dry	Kruger Park	South	Basalt	Hlanganzwane	J Codron et al (2011; Oecologia)	238m	-25.2367	31.9857	0.0254755	0.144445	0.761953	0.066871	0	0	0	0	0.00125495	356.279
JF0453	Faeces	Loxodonta africana	-25.6316	1.69448	47.2275	1.28444	36.769	18.6447	August	2004	Dry	Kruger Park	South	Granite	Fayi Loop	J Codron et al (2011; Oecologia)	634m	-25.1674	31.2501	0.173901	0.559576	0.00827675	0.254465	0.000358301	0.00220355	8.95752e-05	0.00105699	7.16602e-05	208.956
JF0454	Faeces	Loxodonta africana	-25.7381	1.78795	46.757	1.40085	33.3777	17.8876	August	2004	Dry	Kruger Park	South	Granite	Fayi Loop	J Codron et al (2011; Oecologia)	634m	-25.1674	31.2501	0.173901	0.559576	0.00827675	0.254465	0.000358301	0.00220355	8.95752e-05	0.00105699	7.16602e-05	208.956
JF0455	Faeces	Loxodonta africana	-26.4923	4.12263	46.519	1.64062	28.3546	12.5303	August	2004	Dry	Kruger Park	South	Granite	Fayi Loop	J Codron et al (2011; Oecologia)	634m	-25.1674	31.2501	0.173901	0.559576	0.00827675	0.254465	0.000358301	0.00220355	8.95752e-05	0.00105699	7.16602e-05	208.956
JF0456	Faeces	Loxodonta africana	-25.9162	2.97433	45.4961	1.5518	29.3182	16.6226	August	2004	Dry	Kruger Park	South	Granite	Fayi Loop	J Codron et al (2011; Oecologia)	634m	-25.1674	31.2501	0.173901	0.559576	0.00827675	0.254465	0.000358301	0.00220355	8.95752e-05	0.00105699	7.16602e-05	208.956
JF0457	Faeces	Loxodonta africana	-25.2336	1.87668	45.8656	1.47172	31.1645	21.4716	August	2004	Dry	Kruger Park	South	Granite	Mestel Dam	J Codron et al (2011; Oecologia)	516m	-25.0232	31.2147	0.0874286	0.230396	0.0840783	0.542541	0.0027411	0.0276081	7.16628e-05	0.0179515	0.00718419	251.216
JF0458	Faeces	Loxodonta africana	-24.9396	2.83586	44.663	1.12414	39.731	23.5601	August	2004	Dry	Kruger Park	South	Granite	Albasini Rd	J Codron et al (2011; Oecologia)	483m	-25.0479	31.27	0.0313323	0.41359	0.0618226	0.484029	0	0.00458609	0	0.00207807	0.00256176	255.789
JF0459	Faeces	Loxodonta africana	-25.3668	3.30076	46.4164	1.133	40.9678	20.5252	August	2004	Dry	Kruger Park	South	Granite	Albasini Rd	J Codron et al (2011; Oecologia)	483m	-25.0479	31.27	0.0313323	0.41359	0.0618226	0.484029	0	0.00458609	0	0.00207807	0.00256176	255.789
JF0460	Faeces	Loxodonta africana	-25.3309	2.85314	46.8308	0.955768	48.998	20.7808	August	2004	Dry	Kruger Park	South	Granite	Albasini Rd	J Codron et al (2011; Oecologia)	483m	-25.0479	31.27	0.0313323	0.41359	0.0618226	0.484029	0	0.00458609	0	0.00207807	0.00256176	255.789
JF0461	Faeces	Loxodonta africana	-25.8553	3.85068	45.5454	1.33152	34.2056	17.0556	August	2004	Dry	Kruger Park	South	Granite	Albasini Rd	J Codron et al (2011; Oecologia)	483m	-25.0479	31.27	0.0313323	0.41359	0.0618226	0.484029	0	0.00458609	0	0.00207807	0.00256176	255.789
JF0462	Faeces	Loxodonta africana	-24.1045	4.49698	45.7775	1.55429	29.4523	29.4921	August	2004	Dry	Kruger Park	South	Granite	Doispane Rd	J Codron et al (2011; Oecologia)	326m	-25.0021	31.4834	0.0592674	0.49543	0.136958	0.286767	0.000627263	0.0134593	0	0.00544822	0.00204308	245.826
JF0463	Faeces	Loxodonta africana	-26.0268	4.55935	44.5997	1.60932	27.7134	19.3705	August	2004	Dry	Kruger Park	South	Basalt	Sunset Dam	J Codron et al (2011; Oecologia)	175m	-25.1166	31.9126	0.0533307	0.333429	0.522587	0.0764915	0.000519862	0.00301162	0	0.00048401	0.0101463	304.001
JF0464	Faeces	Loxodonta africana	-26.7067	4.8643	43.7351	1.73553	25.1999	14.7796	August	2004	Dry	Kruger Park	South	Basalt	Sunset Dam	J Codron et al (2011; Oecologia)	175m	-25.1166	31.9126	0.0533307	0.333429	0.522587	0.0764915	0.000519862	0.00301162	0	0.00048401	0.0101463	304.001
JF0465	Faeces	Loxodonta africana	-26.7067	3.82244	45.1591	1.66591	27.1077	14.7796	August	2004	Dry	Kruger Park	South	Basalt	Mativuhlungu	J Codron et al (2011; Oecologia)	194m	-25.1323	31.9096	0.0632696	0.378883	0.463194	0.0804044	0.000681089	0.0028319	0	0.000466008	0.0102701	291.503
JF0466	Faeces	Loxodonta africana	-26.3143	5.45703	46.1014	1.52986	30.1343	17.429	August	2004	Dry	Kruger Park	South	Basalt	Mativuhlungu	J Codron et al (2011; Oecologia)	194m	-25.1323	31.9096	0.0632696	0.378883	0.463194	0.0804044	0.000681089	0.0028319	0	0.000466008	0.0102701	291.503
JF0467	Faeces	Loxodonta africana	-26.6013	3.81859	47.6805	1.22591	38.8941	15.4916	August	2004	Dry	Kruger Park	South	Basalt	Mativuhlungu	J Codron et al (2011; Oecologia)	194m	-25.1323	31.9096	0.0632696	0.378883	0.463194	0.0804044	0.000681089	0.0028319	0	0.000466008	0.0102701	291.503
JF0468	Faeces	Loxodonta africana	-26.867	5.7378	45.447	1.45971	31.1343	13.6974	August	2004	Dry	Kruger Park	South	Basalt	Mativuhlungu	J Codron et al (2011; Oecologia)	194m	-25.1323	31.9096	0.0632696	0.378883	0.463194	0.0804044	0.000681089	0.0028319	0	0.000466008	0.0102701	291.503
JF0469	Faeces	Loxodonta africana	-25.7388	6.18611	44.3404	1.69195	26.2066	21.315	August	2004	Dry	Kruger Park	South	Basalt	Mativuhlungu	J Codron et al (2011; Oecologia)	194m	-25.1323	31.9096	0.0632696	0.378883	0.463194	0.0804044	0.000681089	0.0028319	0	0.000466008	0.0102701	291.503
JF0470	Faeces	Loxodonta africana	-25.2459	4.96306	45.2525	1.44449	31.3276	24.6429	August	2004	Dry	Kruger Park	South	Basalt	Mativuhlungu	J Codron et al (2011; Oecologia)	194m	-25.1323	31.9096	0.0632696	0.378883	0.463194	0.0804044	0.000681089	0.0028319	0	0.000466008	0.0102701	291.503
JF0471	Faeces	Loxodonta africana	-24.0862	7.1329	45.7373	1.54496	29.6042	32.4726	August	2004	Dry	Kruger Park	South	Basalt	Mativuhlungu	J Codron et al (2011; Oecologia)	194m	-25.1323	31.9096	0.0632696	0.378883	0.463194	0.0804044	0.000681089	0.0028319	0	0.000466008	0.0102701	291.503
JF0472	Faeces	Loxodonta africana	-26.0888	4.85014	43.6446	1.55838	28.0065	18.9521	August	2004	Dry	Kruger Park	South	Basalt	Gomondwane	J Codron et al (2011; Oecologia)		-25.2381	31.8504	0.278777	0.615367	0.0586021	0.0456591	0	0.00146998	0	0.00010756	1.79266e-05	188.09
JF0483	Faeces	Loxodonta africana	-22.4066	5.67708	43.6284	1.32401	32.9517	40.2158	August	2004	Dry	Kruger Park	North Central	Granite	Letaba Bridge 2	J Codron et al (2011; Oecologia)	264m	-23.7597	31.3709	0.0474834	0.113548	0.0353886	0.773495	0	0.0130266	0	0.0129907	0.00406744	273.662
JF0484	Faeces	Loxodonta africana	-21.2767	6.3039	43	0.772426	55.6688	48.0281	August	2004	Dry	Kruger Park	North Central	Granite	Letaba Bridge 2	J Codron et al (2011; Oecologia)	264m	-23.7597	31.3709	0.0474834	0.113548	0.0353886	0.773495	0	0.0130266	0	0.0129907	0.00406744	273.662
JF0485	Faeces	Loxodonta africana	-21.9153	5.70699	40.8801	1.23073	33.2161	43.613	August	2004	Dry	Kruger Park	North Central	Granite	Letaba Bridge 2	J Codron et al (2011; Oecologia)	264m	-23.7597	31.3709	0.0474834	0.113548	0.0353886	0.773495	0	0.0130266	0	0.0129907	0.00406744	273.662
JF0486	Faeces	Loxodonta africana	-23.0522	5.03097	48.489	1.18498	40.9197	35.752	August	2004	Dry	Kruger Park	North Central	Granite	H14/S133	J Codron et al (2011; Oecologia)	294m	-23.7834	31.3597	0.0192053	0.0568813	0.103354	0.801641	0	0.00845605	0	0.00987137	0.000591207	295.131
JF0487	Faeces	Loxodonta africana	-24.1168	5.96175	45.6493	1.41097	32.3532	28.3916	August	2004	Dry	Kruger Park	North Central	Granite	H14/S133	J Codron et al (2011; Oecologia)	294m	-23.7834	31.3597	0.0192053	0.0568813	0.103354	0.801641	0	0.00845605	0	0.00987137	0.000591207	295.131
JF0488	Faeces	Loxodonta africana	-23.8019	5.68966	50.702	1.12731	44.976	30.5686	August	2004	Dry	Kruger Park	North Central	Granite	Ngwenyeni Bridge	J Codron et al (2011; Oecologia)	291m	-23.7824	31.3542	0.018349	0.052359	0.129948	0.781443	0	0.00836813	0	0.0091028	0.000430054	298.719
JF0489	Faeces	Loxodonta africana	-24.4398	5.8463	46.5807	1.54222	30.2036	26.158	August	2004	Dry	Kruger Park	North Central	Granite	Ngwenyeni Bridge	J Codron et al (2011; Oecologia)	291m	-23.7824	31.3542	0.018349	0.052359	0.129948	0.781443	0	0.00836813	0	0.0091028	0.000430054	298.719
JF0493	Faeces	Loxodonta africana	-21.0431	5.321	43.9549	1.17511	37.4049	49.4203	August	2004	Dry	Kruger Park	North Central	Basalt	S46/S94	J Codron et al (2011; Oecologia)	255m	-23.9171	31.6305	0.0208576	0.0349777	0.269608	0.666924	0	0.00485602	0	0.00121849	0.00155894	317.001
JF0494	Faeces	Loxodonta africana	-24.365	6.48847	44.6406	1.48553	30.0504	24.5113	August	2004	Dry	Kruger Park	North Central	Basalt	Engelhard	J Codron et al (2011; Oecologia)	215m	-23.8351	31.6377	0.114469	0.13947	0.463699	0.247719	0.000519741	0.00845924	0	0.00254494	0.0231195	299.136
JF0495	Faeces	Loxodonta africana	-23.4625	6.28744	45.3177	1.33595	33.9217	31.2783	August	2004	Dry	Kruger Park	North Central	Basalt	Letaba	J Codron et al (2011; Oecologia)	266m	-23.8626	31.5591	0.0636483	0.141618	0.336094	0.43568	3.58481e-05	0.00876485	0	0.0129949	0.00116506	299.83
JF0496	Faeces	Loxodonta africana	-24.7871	5.86806	43.0203	1.60316	26.8346	21.346	August	2004	Dry	Kruger Park	North Central	Basalt	Letaba	J Codron et al (2011; Oecologia)	266m	-23.8626	31.5591	0.0636483	0.141618	0.336094	0.43568	3.58481e-05	0.00876485	0	0.0129949	0.00116506	299.83
JF0497	Faeces	Loxodonta africana	-22.9684	5.09749	44.6529	0.936897	47.6604	34.9835	August	2004	Dry	Kruger Park	North Central	Basalt	Letaba	J Codron et al (2011; Oecologia)	266m	-23.8626	31.5591	0.0636483	0.141618	0.336094	0.43568	3.58481e-05	0.00876485	0	0.0129949	0.00116506	299.83
JF0498	Faeces	Loxodonta africana	-23.8353	5.63011	45.8824	1.31798	34.8128	28.4833	August	2004	Dry	Kruger Park	North Central	Basalt	Letaba	J Codron et al (2011; Oecologia)	266m	-23.8626	31.5591	0.0636483	0.141618	0.336094	0.43568	3.58481e-05	0.00876485	0	0.0129949	0.00116506	299.83
JF0499	Faeces	Loxodonta africana	-23.2644	6.3837	43.6696	1.53625	28.4261	32.7641	August	2004	Dry	Kruger Park	North Central	Basalt	Letaba	J Codron et al (2011; Oecologia)	266m	-23.8626	31.5591	0.0636483	0.141618	0.336094	0.43568	3.58481e-05	0.00876485	0	0.0129949	0.00116506	299.83
JF0500	Faeces	Loxodonta africana	-22.3599	5.83288	43.2496	1.66454	25.9829	39.5467	August	2004	Dry	Kruger Park	North Central	Basalt	Letaba	J Codron et al (2011; Oecologia)	266m	-23.8626	31.5591	0.0636483	0.141618	0.336094	0.43568	3.58481e-05	0.00876485	0	0.0129949	0.00116506	299.83
JF0501	Faeces	Loxodonta africana	-23.7703	5.99518	48.4351	1.24809	38.8074	28.9703	August	2004	Dry	Kruger Park	North Central	Basalt	Letaba	J Codron et al (2011; Oecologia)	266m	-23.8626	31.5591	0.0636483	0.141618	0.336094	0.43568	3.58481e-05	0.00876485	0	0.0129949	0.00116506	299.83
JF0502	Faeces	Loxodonta africana	-21.342	6.27643	45.9936	1.0806	42.563	47.1792	August	2004	Dry	Kruger Park	North Central	Basalt	Letaba Bridge	J Codron et al (2011; Oecologia)	232m	-23.8126	31.5825	0.0611883	0.153024	0.489327	0.249001	0	0.015324	0	0.0298952	0.00224034	307.155
JF0513	Faeces	Loxodonta africana	-24.3011	5.33358	46.2104	1.47401	31.3501	28.0959	August	2004	Dry	Kruger Park	South Central	Granite	Mantimahle	J Codron et al (2011; Oecologia)	287m	-24.8998	31.7372	0.0317176	0.279545	0.237756	0.442075	0	0.000860138	0	0.00804587	0	286.806
JF0514	Faeces	Loxodonta africana	-23.7923	4.91109	44.5067	1.37675	32.3273	31.71	August	2004	Dry	Kruger Park	South Central	Granite	Mantimahle	J Codron et al (2011; Oecologia)	287m	-24.8998	31.7372	0.0317176	0.279545	0.237756	0.442075	0	0.000860138	0	0.00804587	0	286.806
JF0515	Faeces	Loxodonta africana	-23.4392	5.21513	45.0313	1.62358	27.7358	34.2181	August	2004	Dry	Kruger Park	South Central	Granite	Mantimahle	J Codron et al (2011; Oecologia)	287m	-24.8998	31.7372	0.0317176	0.279545	0.237756	0.442075	0	0.000860138	0	0.00804587	0	286.806
JF0516	Faeces	Loxodonta africana	-22.8766	6.71863	44.6207	1.68139	26.538	38.2147	August	2004	Dry	Kruger Park	South Central	Granite	N'watindlopfu	J Codron et al (2011; Oecologia)		-24.9027	31.7536	0.0313956	0.270518	0.233102	0.456544	0	0.000913913	0	0.00750842	1.79199e-05	287.447
JF0517	Faeces	Loxodonta africana	-24.6764	6.49626	45.6256	1.63191	27.9584	25.4296	August	2004	Dry	Kruger Park	South Central	Granite	Kruger Memorial Tablets	J Codron et al (2011; Oecologia)		-24.8298	31.8331	0.039131	0.117285	0.606127	0.225769	0	0.000161328	0	0.0112392	0.000286805	337.552
JF0518	Faeces	Loxodonta africana	-25.5052	5.42275	45.2134	1.6425	27.5272	19.5426	August	2004	Dry	Kruger Park	South Central	Granite	Mhisanamond	J Codron et al (2011; Oecologia)	311m	-24.6126	31.7111	0.0419123	0.549232	0.0711918	0.322486	0	0.00628953	0	0.00888777	0	239.26
JF0519	Faeces	Loxodonta africana	-24.2909	6.43959	44.9786	1.71718	26.1934	28.1685	August	2004	Dry	Kruger Park	South Central	Granite	Mhisanamond	J Codron et al (2011; Oecologia)	311m	-24.6126	31.7111	0.0419123	0.549232	0.0711918	0.322486	0	0.00628953	0	0.00888777	0	239.26
JF0520	Faeces	Loxodonta africana	-26.062	7.41164	42.9979	1.92568	22.3287	15.5871	August	2004	Dry	Kruger Park	South Central	Granite	Mhisanamond	J Codron et al (2011; Oecologia)	311m	-24.6126	31.7111	0.0419123	0.549232	0.0711918	0.322486	0	0.00628953	0	0.00888777	0	239.26
JF0521	Faeces	Loxodonta africana	-25.3378	6.36245	44.4858	1.28621	34.5868	20.7314	August	2004	Dry	Kruger Park	South Central	Granite	Mhisanamond	J Codron et al (2011; Oecologia)	311m	-24.6126	31.7111	0.0419123	0.549232	0.0711918	0.322486	0	0.00628953	0	0.00888777	0	239.26
JF0522	Faeces	Loxodonta africana	-26.0997	7.95793	48.3463	1.29905	37.2167	15.3191	August	2004	Dry	Kruger Park	South Central	Granite	Mhisanamond	J Codron et al (2011; Oecologia)	311m	-24.6126	31.7111	0.0419123	0.549232	0.0711918	0.322486	0	0.00628953	0	0.00888777	0	239.26
JF0523	Faeces	Loxodonta africana	-25.6784	5.7084	48.3486	1.04851	46.1115	21.7226	August	2004	Dry	Kruger Park	South Central	Basalt	Tshokwane	J Codron et al (2011; Oecologia)	258m	-24.7996	31.8761	0.0454945	0.0559987	0.708552	0.182659	0	0.00136232	0	0.00308316	0.00285013	353.968
JF0524	Faeces	Loxodonta africana	-22.6692	7.8412	44.9264	1.6193	27.7443	42.0403	August	2004	Dry	Kruger Park	South Central	Basalt	Mazithi	J Codron et al (2011; Oecologia)	265m	-24.7217	31.8356	0.0046073	0.0572059	0.414872	0.511733	0	0.00709919	0	0.00444596	3.58545e-05	331.371
JF0525	Faeces	Loxodonta africana	-22.583	7.67472	50.1476	1.69347	29.6123	42.6222	August	2004	Dry	Kruger Park	South Central	Basalt	Mazithi	J Codron et al (2011; Oecologia)	265m	-24.7217	31.8356	0.0046073	0.0572059	0.414872	0.511733	0	0.00709919	0	0.00444596	3.58545e-05	331.371
JF0526	Faeces	Loxodonta africana	-23.0712	7.76819	45.8609	1.95282	23.4844	39.3255	August	2004	Dry	Kruger Park	South Central	Basalt	Mazithi	J Codron et al (2011; Oecologia)	265m	-24.7217	31.8356	0.0046073	0.0572059	0.414872	0.511733	0	0.00709919	0	0.00444596	3.58545e-05	331.371
JF0527	Faeces	Loxodonta africana	-21.1061	7.83978	44.0608	1.45547	30.2726	52.5939	August	2004	Dry	Kruger Park	South Central	Basalt	Mazithi	J Codron et al (2011; Oecologia)	265m	-24.7217	31.8356	0.0046073	0.0572059	0.414872	0.511733	0	0.00709919	0	0.00444596	3.58545e-05	331.371
JF0528	Faeces	Loxodonta africana	-21.5645	7.72964	43.9444	1.7945	24.4884	49.4987	August	2004	Dry	Kruger Park	South Central	Basalt	Mazithi	J Codron et al (2011; Oecologia)	265m	-24.7217	31.8356	0.0046073	0.0572059	0.414872	0.511733	0	0.00709919	0	0.00444596	3.58545e-05	331.371
JF0529	Faeces	Loxodonta africana	-22.8516	9.57928	43.0124	2.16803	19.8394	40.8083	August	2004	Dry	Kruger Park	South Central	Basalt	N'watinungu	J Codron et al (2011; Oecologia)	275m	-24.6824	31.8109	0.0154715	0.0974722	0.529473	0.33806	0	0.00813912	0	0.011384	0	334.249
JF0530	Faeces	Loxodonta africana	-22.1256	7.2762	47.7452	1.50461	31.7327	45.71	August	2004	Dry	Kruger Park	South Central	Basalt	N'watinungu	J Codron et al (2011; Oecologia)	275m	-24.6824	31.8109	0.0154715	0.0974722	0.529473	0.33806	0	0.00813912	0	0.011384	0	334.249
JF0531	Faeces	Loxodonta africana	-22.7566	7.13113	45.5963	1.27096	35.8754	41.45	August	2004	Dry	Kruger Park	South Central	Basalt	N'watinungu	J Codron et al (2011; Oecologia)	275m	-24.6824	31.8109	0.0154715	0.0974722	0.529473	0.33806	0	0.00813912	0	0.011384	0	334.249
JF0532	Faeces	Loxodonta africana	-22.5087	7.24316	45.3866	1.58024	28.7213	43.124	August	2004	Dry	Kruger Park	South Central	Basalt	N'watinungu	J Codron et al (2011; Oecologia)	275m	-24.6824	31.8109	0.0154715	0.0974722	0.529473	0.33806	0	0.00813912	0	0.011384	0	334.249
JF0533	Faeces	Loxodonta africana	-24.9371	7.5061	45.7022	2.04886	22.3062	23.5782	September	2004	Dry	Kruger Park	South	Granite	Sabie River	J Codron et al (2011; Oecologia)	282m	-24.9349	31.7017	0.0782535	0.463409	0.0219203	0.406162	0	0.00942771	0	0.0180847	0.00274228	231.124
JF0534	Faeces	Loxodonta africana	-26.3859	8.29936	45.8113	2.13833	21.4238	13.2862	September	2004	Dry	Kruger Park	South	Granite	Sabie River	J Codron et al (2011; Oecologia)	282m	-24.9349	31.7017	0.0782535	0.463409	0.0219203	0.406162	0	0.00942771	0	0.0180847	0.00274228	231.124
JF0535	Faeces	Loxodonta africana	-24.233	6.2692	45.6739	1.86873	24.4411	28.5794	September	2004	Dry	Kruger Park	South	Granite	Sabie River	J Codron et al (2011; Oecologia)	282m	-24.9349	31.7017	0.0782535	0.463409	0.0219203	0.406162	0	0.00942771	0	0.0180847	0.00274228	231.124
JF0536	Faeces	Loxodonta africana	-24.4525	6.44029	46.3233	1.50808	30.7167	27.0205	September	2004	Dry	Kruger Park	South	Granite	Sabie River	J Codron et al (2011; Oecologia)	282m	-24.9349	31.7017	0.0782535	0.463409	0.0219203	0.406162	0	0.00942771	0	0.0180847	0.00274228	231.124
JF0537	Faeces	Loxodonta africana	-23.4768	6.35355	47.567	1.40411	33.8769	33.9515	September	2004	Dry	Kruger Park	South	Granite	Sabie River	J Codron et al (2011; Oecologia)	282m	-24.9349	31.7017	0.0782535	0.463409	0.0219203	0.406162	0	0.00942771	0	0.0180847	0.00274228	231.124
JF0538	Faeces	Loxodonta africana	-24.2983	4.01491	46.9392	1.48038	31.7075	28.1156	September	2004	Dry	Kruger Park	South	Granite	Napi Boulder	J Codron et al (2011; Oecologia)	481m	-25.115	31.4003	0.00745613	0.596096	0.014518	0.378417	0	0.00236589	0	0.0011471	0	239.297
JF0539	Faeces	Loxodonta africana	-24.4232	5.71828	45.2438	1.32804	34.068	27.2285	September	2004	Dry	Kruger Park	South	Granite	Napi Boulder	J Codron et al (2011; Oecologia)	481m	-25.115	31.4003	0.00745613	0.596096	0.014518	0.378417	0	0.00236589	0	0.0011471	0	239.297
JF0540	Faeces	Loxodonta africana	-24.3836	4.50008	46.1696	1.20344	38.3646	27.5094	September	2004	Dry	Kruger Park	South	Granite	Napi Boulder	J Codron et al (2011; Oecologia)	481m	-25.115	31.4003	0.00745613	0.596096	0.014518	0.378417	0	0.00236589	0	0.0011471	0	239.297
JF0541	Faeces	Loxodonta africana	-24.6347	7.28243	47.8578	1.35009	35.4478	25.7264	September	2004	Dry	Kruger Park	South	Granite	Napi Boulder	J Codron et al (2011; Oecologia)	481m	-25.115	31.4003	0.00745613	0.596096	0.014518	0.378417	0	0.00236589	0	0.0011471	0	239.297
JF0542	Faeces	Loxodonta africana	-23.9104	6.5924	47.02	1.44071	32.6366	30.871	September	2004	Dry	Kruger Park	South	Granite	Shitlhave Dam	J Codron et al (2011; Oecologia)	570m	-25.1496	31.3028	0.0496229	0.50447	0.0561079	0.388832	0.000179144	0.000304545	0	0.000179144	0.000304545	244.949
JF0543	Faeces	Loxodonta africana	-23.4043	5.16941	47.2524	1.90151	24.8499	37.0767	September	2004	Dry	Kruger Park	South	Basalt	H10	J Codron et al (2011; Oecologia)	367m	-25.0425	31.9074	0.0233905	0.150577	0.767655	0.0492723	0.00111127	8.96186e-05	0	1.79237e-05	0.00788644	354.298
JF0544	Faeces	Loxodonta africana	-25.2577	7.08944	46.2671	1.66116	27.8523	24.5632	September	2004	Dry	Kruger Park	South	Basalt	H10	J Codron et al (2011; Oecologia)	367m	-25.0425	31.9074	0.0233905	0.150577	0.767655	0.0492723	0.00111127	8.96186e-05	0	1.79237e-05	0.00788644	354.298
JF0545	Faeces	Loxodonta africana	-25.8553	6.31525	45.6659	1.87494	24.3559	20.5282	September	2004	Dry	Kruger Park	South	Basalt	H10	J Codron et al (2011; Oecologia)	367m	-25.0425	31.9074	0.0233905	0.150577	0.767655	0.0492723	0.00111127	8.96186e-05	0	1.79237e-05	0.00788644	354.298
JF0546	Faeces	Loxodonta africana	-25.0081	5.17112	44.4234	1.46554	30.3121	26.2485	September	2004	Dry	Kruger Park	South	Basalt	H10	J Codron et al (2011; Oecologia)	367m	-25.0425	31.9074	0.0233905	0.150577	0.767655	0.0492723	0.00111127	8.96186e-05	0	1.79237e-05	0.00788644	354.298
JF0547	Faeces	Loxodonta africana	-24.7452	7.26442	44.4043	1.29581	34.2677	28.0237	September	2004	Dry	Kruger Park	South	Basalt	H10	J Codron et al (2011; Oecologia)	367m	-25.0425	31.9074	0.0233905	0.150577	0.767655	0.0492723	0.00111127	8.96186e-05	0	1.79237e-05	0.00788644	354.298
JF0548	Faeces	Loxodonta africana	-24.1974	4.09943	44.0412	1.52192	28.9378	31.722	September	2004	Dry	Kruger Park	South	Basalt	H10	J Codron et al (2011; Oecologia)	367m	-25.0425	31.9074	0.0233905	0.150577	0.767655	0.0492723	0.00111127	8.96186e-05	0	1.79237e-05	0.00788644	354.298
JF0549	Faeces	Loxodonta africana	-25.7999	6.47775	40.2649	1.4163	28.4297	20.9023	September	2004	Dry	Kruger Park	South	Basalt	H10	J Codron et al (2011; Oecologia)	367m	-25.0425	31.9074	0.0233905	0.150577	0.767655	0.0492723	0.00111127	8.96186e-05	0	1.79237e-05	0.00788644	354.298
JF0550	Faeces	Loxodonta africana	-25.8651	5.49241	46.076	1.24034	37.1479	20.4622	September	2004	Dry	Kruger Park	South	Basalt	S29	J Codron et al (2011; Oecologia)	181m	-25.1126	31.9373	0.0450643	0.157241	0.717945	0.0670049	0.000609461	0.00245577	0	0.000376432	0.00930324	343.234
JF0551	Faeces	Loxodonta africana	-23.6935	6.43518	43.6261	1.58674	27.4942	35.1243	September	2004	Dry	Kruger Park	South	Basalt	S128	J Codron et al (2011; Oecologia)	201m	-25.0897	31.9111	0.0465975	0.234565	0.643762	0.0629066	0.000483897	0.0021865	0	0.000268832	0.00922989	327.95
JF0552	Faeces	Loxodonta africana	-24.7204	4.26286	46.1515	1.38445	33.3355	28.1911	September	2004	Dry	Kruger Park	South	Basalt	S128	J Codron et al (2011; Oecologia)	201m	-25.0897	31.9111	0.0465975	0.234565	0.643762	0.0629066	0.000483897	0.0021865	0	0.000268832	0.00922989	327.95
JF0567	Faeces	Loxodonta africana	-21.9301	4.24272	44.9648	1.58298	28.4052	43.5108	September	2004	Dry	Kruger Park	North Central	Granite	Ngwenyeni Bridge	J Codron et al (2011; Oecologia)	291m	-23.7824	31.3542	0.018349	0.052359	0.129948	0.781443	0	0.00836813	0	0.0091028	0.000430054	298.719
JF0568	Faeces	Loxodonta africana	-22.2777	5.14213	46.2114	1.54763	29.8595	41.107	September	2004	Dry	Kruger Park	North Central	Granite	H14/S133	J Codron et al (2011; Oecologia)	294m	-23.7834	31.3597	0.0192053	0.0568813	0.103354	0.801641	0	0.00845605	0	0.00987137	0.000591207	295.131
JF0569	Faeces	Loxodonta africana	-23.1962	4.22647	45.8606	1.4708	31.1806	34.7569	September	2004	Dry	Kruger Park	North Central	Granite	H14/S133	J Codron et al (2011; Oecologia)	294m	-23.7834	31.3597	0.0192053	0.0568813	0.103354	0.801641	0	0.00845605	0	0.00987137	0.000591207	295.131
JF0571	Faeces	Loxodonta africana	-21.3194	3.72355	43.6312	1.20448	36.2242	47.7328	September	2004	Dry	Kruger Park	North Central	Granite	Letaba Bridge 2	J Codron et al (2011; Oecologia)	264m	-23.7597	31.3709	0.0474834	0.113548	0.0353886	0.773495	0	0.0130266	0	0.0129907	0.00406744	273.662
JF0575	Faeces	Loxodonta africana	-20.9647	5.9743	45.762	1.1458	39.9391	50.0086	September	2004	Dry	Kruger Park	North Central	Basalt	Letaba Bridge	J Codron et al (2011; Oecologia)	232m	-23.8126	31.5825	0.0611883	0.153024	0.489327	0.249001	0	0.015324	0	0.0298952	0.00224034	307.155
JF0576	Faeces	Loxodonta africana	-22.1316	8.49851	45.5669	1.54054	29.5785	41.2582	September	2004	Dry	Kruger Park	North Central	Basalt	Letaba Bridge	J Codron et al (2011; Oecologia)	232m	-23.8126	31.5825	0.0611883	0.153024	0.489327	0.249001	0	0.015324	0	0.0298952	0.00224034	307.155
JF0577	Faeces	Loxodonta africana	-21.6347	9.09136	46.1858	1.08892	42.4142	44.9844	September	2004	Dry	Kruger Park	North Central	Basalt	Letaba Bridge	J Codron et al (2011; Oecologia)	232m	-23.8126	31.5825	0.0611883	0.153024	0.489327	0.249001	0	0.015324	0	0.0298952	0.00224034	307.155
JF0578	Faeces	Loxodonta africana	-21.2037	7.64089	45.6117	1.04956	43.458	48.216	September	2004	Dry	Kruger Park	North Central	Basalt	Letaba Bridge	J Codron et al (2011; Oecologia)	232m	-23.8126	31.5825	0.0611883	0.153024	0.489327	0.249001	0	0.015324	0	0.0298952	0.00224034	307.155
JF0579	Faeces	Loxodonta africana	-21.4341	8.69421	45.3479	1.6267	27.8772	46.4886	September	2004	Dry	Kruger Park	North Central	Basalt	Letaba Bridge	J Codron et al (2011; Oecologia)	232m	-23.8126	31.5825	0.0611883	0.153024	0.489327	0.249001	0	0.015324	0	0.0298952	0.00224034	307.155
JF0580	Faeces	Loxodonta africana	-21.9727	1.6814	44.079	1.33828	32.937	42.4498	September	2004	Dry	Kruger Park	North Central	Basalt	Letaba Bridge	J Codron et al (2011; Oecologia)	232m	-23.8126	31.5825	0.0611883	0.153024	0.489327	0.249001	0	0.015324	0	0.0298952	0.00224034	307.155
JF0581	Faeces	Loxodonta africana	-22.2282	1.78452	47.7721	1.50123	31.822	40.5339	September	2004	Dry	Kruger Park	North Central	Basalt	Letaba	J Codron et al (2011; Oecologia)	266m	-23.8626	31.5591	0.0636483	0.141618	0.336094	0.43568	3.58481e-05	0.00876485	0	0.0129949	0.00116506	299.83
JF0582	Faeces	Loxodonta africana	-21.9809	4.56496	46.5433	1.85964	25.0282	42.3886	September	2004	Dry	Kruger Park	North Central	Basalt	Shamiriri	J Codron et al (2011; Oecologia)	294m	-23.9513	31.6194	0.00328051	0.0142335	0.199143	0.783343	0	0	0	0	0	317.835
JF0593	Faeces	Loxodonta africana	-24.0396	-2.1838	45.1979	1.39236	32.4613	29.9534	September	2004	Dry	Kruger Park	South Central	Granite	Mhisanamond	J Codron et al (2011; Oecologia)	311m	-24.6126	31.7111	0.0419123	0.549232	0.0711918	0.322486	0	0.00628953	0	0.00888777	0	239.26
JF0594	Faeces	Loxodonta africana	-26.4929	-2.1838	45.8334	1.13181	40.4959	12.5258	September	2004	Dry	Kruger Park	South Central	Granite	Mhisanamond	J Codron et al (2011; Oecologia)	311m	-24.6126	31.7111	0.0419123	0.549232	0.0711918	0.322486	0	0.00628953	0	0.00888777	0	239.26
JF0595	Faeces	Loxodonta africana	-23.0921	-2.1838	44.6703	1.36796	32.6548	36.6844	September	2004	Dry	Kruger Park	South Central	Granite	Mhisanamond	J Codron et al (2011; Oecologia)	311m	-24.6126	31.7111	0.0419123	0.549232	0.0711918	0.322486	0	0.00628953	0	0.00888777	0	239.26
JF0596	Faeces	Loxodonta africana	-25.4011	-2.1838	45.5423	1.55274	29.3304	20.2821	September	2004	Dry	Kruger Park	South Central	Granite	Mhisanamond	J Codron et al (2011; Oecologia)	311m	-24.6126	31.7111	0.0419123	0.549232	0.0711918	0.322486	0	0.00628953	0	0.00888777	0	239.26
JF0597	Faeces	Loxodonta africana	-25.283	9.49356	48.0662	2.31492	20.7637	21.1209	September	2004	Dry	Kruger Park	South Central	Granite	Mhisanamond	J Codron et al (2011; Oecologia)	311m	-24.6126	31.7111	0.0419123	0.549232	0.0711918	0.322486	0	0.00628953	0	0.00888777	0	239.26
JF0598	Faeces	Loxodonta africana	-25.6847	-2.1838	47.5893	1.28037	37.1684	18.2671	September	2004	Dry	Kruger Park	South Central	Granite	Mhisanamond	J Codron et al (2011; Oecologia)	311m	-24.6126	31.7111	0.0419123	0.549232	0.0711918	0.322486	0	0.00628953	0	0.00888777	0	239.26
JF0599	Faeces	Loxodonta africana	-20.8739	-2.1838	44.7469	1.4734	30.3698	52.441	September	2004	Dry	Kruger Park	South Central	Granite	Mhisanamond	J Codron et al (2011; Oecologia)	311m	-24.6126	31.7111	0.0419123	0.549232	0.0711918	0.322486	0	0.00628953	0	0.00888777	0	239.26
JF0600	Faeces	Loxodonta africana	-25.5979	6.26696	47.0145	1.46592	32.0717	18.8841	September	2004	Dry	Kruger Park	South Central	Granite	Mhisanamond	J Codron et al (2011; Oecologia)	311m	-24.6126	31.7111	0.0419123	0.549232	0.0711918	0.322486	0	0.00628953	0	0.00888777	0	239.26
JF0601	Faeces	Loxodonta africana	-23.3529	6.80559	43.0897	1.52442	28.2664	34.8313	September	2004	Dry	Kruger Park	South Central	Granite	Nhlanguleni	J Codron et al (2011; Oecologia)	349m	-24.7099	31.6574	0.0150912	0.0789153	0.343514	0.532835	0	0.000179231	0	0.0293221	0.000143385	314.548
JF0602	Faeces	Loxodonta africana	-21.6522	-2.1838	44.3565	1.93668	22.9034	46.9127	September	2004	Dry	Kruger Park	South Central	Granite	Nhlanguleni	J Codron et al (2011; Oecologia)	349m	-24.7099	31.6574	0.0150912	0.0789153	0.343514	0.532835	0	0.000179231	0	0.0293221	0.000143385	314.548
JF0603	Faeces	Loxodonta africana	-22.0416	4.93982	45.659	1.25856	36.2786	46.2772	September	2004	Dry	Kruger Park	South Central	Basalt	Ntomeni	J Codron et al (2011; Oecologia)	297m	-24.2691	31.7301	0.00315469	0.00537731	0.759312	0.232085	5.37731e-05	1.79244e-05	0	0	0	374.741
JF0604	Faeces	Loxodonta africana	-23.8736	-2.1838	43.5602	1.43832	30.2855	33.9083	September	2004	Dry	Kruger Park	South Central	Basalt	Ntomeni	J Codron et al (2011; Oecologia)	297m	-24.2691	31.7301	0.00315469	0.00537731	0.759312	0.232085	5.37731e-05	1.79244e-05	0	0	0	374.741
JF0605	Faeces	Loxodonta africana	-22.3322	-2.1838	45.2451	0.992413	45.591	44.3154	September	2004	Dry	Kruger Park	South Central	Basalt	Ntomeni	J Codron et al (2011; Oecologia)	297m	-24.2691	31.7301	0.00315469	0.00537731	0.759312	0.232085	5.37731e-05	1.79244e-05	0	0	0	374.741
JF0606	Faeces	Loxodonta africana	-20.4848	-2.1838	45.3372	1.13367	39.9917	56.7888	September	2004	Dry	Kruger Park	South Central	Basalt	N'wanetsi Bridge	J Codron et al (2011; Oecologia)	259m	-24.4196	31.7835	0.0317457	0.0332335	0.759137	0.161955	0	0.0111854	0	0.00270672	3.58506e-05	362.063
JF0607	Faeces	Loxodonta africana	-23.0794	-2.1838	38.4872	1.2357	31.1461	39.2707	September	2004	Dry	Kruger Park	South Central	Basalt	Sweni	J Codron et al (2011; Oecologia)	262m	-24.4331	31.788	0.0222405	0.0284234	0.831162	0.10459	0	0.0109321	0	0.00261653	3.58429e-05	371.75
JF0608	Faeces	Loxodonta africana	-25.313	-2.1838	45.2729	1.33819	33.8313	24.1898	September	2004	Dry	Kruger Park	South Central	Basalt	Sweni	J Codron et al (2011; Oecologia)	262m	-24.4331	31.788	0.0222405	0.0284234	0.831162	0.10459	0	0.0109321	0	0.00261653	3.58429e-05	371.75
JF0609	Faeces	Loxodonta africana	-23.183	6.21708	45.5339	1.21063	37.6118	38.5711	September	2004	Dry	Kruger Park	South Central	Basalt	Kumana	J Codron et al (2011; Oecologia)	305m	-24.6125	31.7914	0.0271854	0.328572	0.457743	0.178417	0	0.00557328	0	0.00250887	0	305.055
JF0610	Faeces	Loxodonta africana	-24.3769	-2.1838	46.5693	1.72187	27.0458	30.5098	September	2004	Dry	Kruger Park	South Central	Basalt	Kumana	J Codron et al (2011; Oecologia)	305m	-24.6125	31.7914	0.0271854	0.328572	0.457743	0.178417	0	0.00557328	0	0.00250887	0	305.055
JF0611	Faeces	Loxodonta africana	-23.5543	6.12807	46.4421	1.35789	34.2016	36.064	September	2004	Dry	Kruger Park	South Central	Basalt	Kumana	J Codron et al (2011; Oecologia)	305m	-24.6125	31.7914	0.0271854	0.328572	0.457743	0.178417	0	0.00557328	0	0.00250887	0	305.055
JF0612	Faeces	Loxodonta africana	-24.4805	6.20771	45.9834	1.61211	28.5237	29.8107	September	2004	Dry	Kruger Park	South Central	Basalt	Kumana	J Codron et al (2011; Oecologia)	305m	-24.6125	31.7914	0.0271854	0.328572	0.457743	0.178417	0	0.00557328	0	0.00250887	0	305.055
JF0613	Faeces	Loxodonta africana	-24.653	7.56997	42.4498	1.66627	25.4759	24.7423	October	2004	Wet	Kruger Park	South	Granite	Sabie River	J Codron et al (2011; Oecologia)	282m	-24.9349	31.7017	0.0782535	0.463409	0.0219203	0.406162	0	0.00942771	0	0.0180847	0.00274228	231.124
JF0614	Faeces	Loxodonta africana	-23.2055	6.89129	45.1472	1.52044	29.6934	36.0423	October	2004	Wet	Kruger Park	South	Granite	Sabie River	J Codron et al (2011; Oecologia)	282m	-24.9349	31.7017	0.0782535	0.463409	0.0219203	0.406162	0	0.00942771	0	0.0180847	0.00274228	231.124
JF0615	Faeces	Loxodonta africana	-23.2976	6.08939	48.0742	1.19686	40.1668	35.3235	October	2004	Wet	Kruger Park	South	Granite	Sabie River	J Codron et al (2011; Oecologia)	282m	-24.9349	31.7017	0.0782535	0.463409	0.0219203	0.406162	0	0.00942771	0	0.0180847	0.00274228	231.124
JF0616	Faeces	Loxodonta africana	-24.2427	7.14972	49.7806	1.57292	31.6485	27.9452	October	2004	Wet	Kruger Park	South	Granite	Sabie River	J Codron et al (2011; Oecologia)	282m	-24.9349	31.7017	0.0782535	0.463409	0.0219203	0.406162	0	0.00942771	0	0.0180847	0.00274228	231.124
JF0617	Faeces	Loxodonta africana	-23.3083	6.83083	47.1161	1.46706	32.116	35.2402	October	2004	Wet	Kruger Park	South	Granite	Sabie River	J Codron et al (2011; Oecologia)	282m	-24.9349	31.7017	0.0782535	0.463409	0.0219203	0.406162	0	0.00942771	0	0.0180847	0.00274228	231.124
JF0618	Faeces	Loxodonta africana	-23.8002	7.93117	46.9307	1.62039	28.9626	31.4	October	2004	Wet	Kruger Park	South	Granite	Sabie River	J Codron et al (2011; Oecologia)	282m	-24.9349	31.7017	0.0782535	0.463409	0.0219203	0.406162	0	0.00942771	0	0.0180847	0.00274228	231.124
JF0619	Faeces	Loxodonta africana	-24.9166	7.4444	44.3044	1.7193	25.7688	22.6839	October	2004	Wet	Kruger Park	South	Granite	Hlanganzwane	J Codron et al (2011; Oecologia)	238m	-25.2367	31.9857	0.0254755	0.144445	0.761953	0.066871	0	0	0	0	0.00125495	356.279
JF0620	Faeces	Loxodonta africana	-24.7111	3.32717	45.2952	1.38815	32.63	24.288	October	2004	Wet	Kruger Park	South	Granite	Albasini Rd	J Codron et al (2011; Oecologia)	483m	-25.0479	31.27	0.0313323	0.41359	0.0618226	0.484029	0	0.00458609	0	0.00207807	0.00256176	255.789
JF0621	Faeces	Loxodonta africana	-25.104	5.50923	50.8503	1.40404	36.2171	21.2214	October	2004	Wet	Kruger Park	South	Granite	Doispane Rd	J Codron et al (2011; Oecologia)	326m	-25.0021	31.4834	0.0592674	0.49543	0.136958	0.286767	0.000627263	0.0134593	0	0.00544822	0.00204308	245.826
JF0622	Faeces	Loxodonta africana	-25.16	3.08484	48.4385	1.35846	35.6569	20.7838	October	2004	Wet	Kruger Park	South	Granite	Albasini Rd	J Codron et al (2011; Oecologia)	483m	-25.0479	31.27	0.0313323	0.41359	0.0618226	0.484029	0	0.00458609	0	0.00207807	0.00256176	255.789
JF0623	Faeces	Loxodonta africana	-23.3605	4.63995	46.0095	1.03693	44.3708	32.0416	October	2004	Wet	Kruger Park	South	Basalt	Lower Sabie	J Codron et al (2011; Oecologia)		-25.0938	31.9128	0.0471139	0.24048	0.634594	0.0648734	0.000465941	0.00218634	0	0.000268812	0.0100177	326.107
JF0624	Faeces	Loxodonta africana	-25.522	4.72368	46.2502	1.49783	30.8782	14.8875	October	2004	Wet	Kruger Park	South	Basalt	Lower Sabie	J Codron et al (2011; Oecologia)		-25.0938	31.9128	0.0471139	0.24048	0.634594	0.0648734	0.000465941	0.00218634	0	0.000268812	0.0100177	326.107
JF0625	Faeces	Loxodonta africana	-25.471	4.54767	47.9994	1.39453	34.4198	15.2922	October	2004	Wet	Kruger Park	South	Basalt	Lower Sabie	J Codron et al (2011; Oecologia)		-25.0938	31.9128	0.0471139	0.24048	0.634594	0.0648734	0.000465941	0.00218634	0	0.000268812	0.0100177	326.107
JF0626	Faeces	Loxodonta africana	-25.2752	4.2049	47.3878	1.47948	32.0302	16.8468	October	2004	Wet	Kruger Park	South	Basalt	Lower Sabie	J Codron et al (2011; Oecologia)		-25.0938	31.9128	0.0471139	0.24048	0.634594	0.0648734	0.000465941	0.00218634	0	0.000268812	0.0100177	326.107
JF0627	Faeces	Loxodonta africana	-24.7473	6.20325	44.7803	1.30617	34.2837	21.036	October	2004	Wet	Kruger Park	South	Basalt	Lower Sabie	J Codron et al (2011; Oecologia)		-25.0938	31.9128	0.0471139	0.24048	0.634594	0.0648734	0.000465941	0.00218634	0	0.000268812	0.0100177	326.107
JF0628	Faeces	Loxodonta africana	-23.8146	3.44203	49.3529	1.25891	39.2028	28.4382	October	2004	Wet	Kruger Park	South	Basalt	Lower Sabie	J Codron et al (2011; Oecologia)		-25.0938	31.9128	0.0471139	0.24048	0.634594	0.0648734	0.000465941	0.00218634	0	0.000268812	0.0100177	326.107
JF0629	Faeces	Loxodonta africana	-25.1828	4.59089	52.0457	1.71469	30.3528	17.5801	October	2004	Wet	Kruger Park	South	Basalt	Mativuhlungu	J Codron et al (2011; Oecologia)	194m	-25.1323	31.9096	0.0632696	0.378883	0.463194	0.0804044	0.000681089	0.0028319	0	0.000466008	0.0102701	291.503
JF0630	Faeces	Loxodonta africana	-25.3037	4.5306	48.3496	1.31805	36.6828	16.62	October	2004	Wet	Kruger Park	South	Basalt	Mativuhlungu	J Codron et al (2011; Oecologia)	194m	-25.1323	31.9096	0.0632696	0.378883	0.463194	0.0804044	0.000681089	0.0028319	0	0.000466008	0.0102701	291.503
JF0631	Faeces	Loxodonta africana	-25.1046	4.85772	49.2762	1.59469	30.9003	18.2005	October	2004	Wet	Kruger Park	South	Basalt	Mativuhlungu	J Codron et al (2011; Oecologia)	194m	-25.1323	31.9096	0.0632696	0.378883	0.463194	0.0804044	0.000681089	0.0028319	0	0.000466008	0.0102701	291.503
JF0632	Faeces	Loxodonta africana	-23.8612	4.59146	45.5894	1.20401	37.8647	28.068	October	2004	Wet	Kruger Park	South	Basalt	Mativuhlungu	J Codron et al (2011; Oecologia)	194m	-25.1323	31.9096	0.0632696	0.378883	0.463194	0.0804044	0.000681089	0.0028319	0	0.000466008	0.0102701	291.503
JF0643	Faeces	Loxodonta africana	-21.8912	4.77991	44.9542	1.45278	30.9436	37.2859	October	2004	Wet	Kruger Park	North Central	Granite	Vudogwa	J Codron et al (2011; Oecologia)	323m	-23.9468	31.2439	0.00766833	0.166177	0.164977	0.641309	1.79167e-05	0.0148171	0	0.00361916	0.00141542	292.385
JF0644	Faeces	Loxodonta africana	-22.7618	5.13207	46.8776	1.36177	34.424	29.4853	October	2004	Wet	Kruger Park	North Central	Granite	Vudogwa	J Codron et al (2011; Oecologia)	323m	-23.9468	31.2439	0.00766833	0.166177	0.164977	0.641309	1.79167e-05	0.0148171	0	0.00361916	0.00141542	292.385
JF0645	Faeces	Loxodonta africana	-21.3723	5.41036	46.825	1.24072	37.7402	41.935	October	2004	Wet	Kruger Park	North Central	Granite	Masorini	J Codron et al (2011; Oecologia)	421m	-23.9201	31.2686	0.0031704	0.0832005	0.173799	0.720826	1.79118e-05	0.0150997	0	0.00247183	0.00141504	302.724
JF0646	Faeces	Loxodonta africana	-21.4065	4.25838	44.4702	1.09341	40.6711	41.6284	October	2004	Wet	Kruger Park	North Central	Granite	Erfplaas	J Codron et al (2011; Oecologia)	414m	-23.9213	31.3037	0.00111113	0.0999301	0.206921	0.672969	1.79215e-05	0.017796	0	0.00107529	0.000179215	304.756
JF0647	Faeces	Loxodonta africana	-18.7238	4.51651	39.4461	1.55511	25.3655	65.6638	October	2004	Wet	Kruger Park	North Central	Granite	Erfplaas	J Codron et al (2011; Oecologia)	414m	-23.9213	31.3037	0.00111113	0.0999301	0.206921	0.672969	1.79215e-05	0.017796	0	0.00107529	0.000179215	304.756
JF0653	Faeces	Loxodonta africana	-22.2938	6.39499	45.8612	1.40216	32.7075	33.5265	October	2004	Wet	Kruger Park	North Central	Basalt	Letaba	J Codron et al (2011; Oecologia)	266m	-23.8626	31.5591	0.0636483	0.141618	0.336094	0.43568	3.58481e-05	0.00876485	0	0.0129949	0.00116506	299.83
JF0654	Faeces	Loxodonta africana	-21.3314	5.94873	47.4924	1.1062	42.9329	41.3663	October	2004	Wet	Kruger Park	North Central	Basalt	Letaba	J Codron et al (2011; Oecologia)	266m	-23.8626	31.5591	0.0636483	0.141618	0.336094	0.43568	3.58481e-05	0.00876485	0	0.0129949	0.00116506	299.83
JF0655	Faeces	Loxodonta africana	-22.1394	6.60033	44.9796	1.20914	37.1997	34.7841	October	2004	Wet	Kruger Park	North Central	Basalt	Letaba	J Codron et al (2011; Oecologia)	266m	-23.8626	31.5591	0.0636483	0.141618	0.336094	0.43568	3.58481e-05	0.00876485	0	0.0129949	0.00116506	299.83
JF0656	Faeces	Loxodonta africana	-22.8588	5.97165	47.0406	1.23811	37.9939	28.9241	October	2004	Wet	Kruger Park	North Central	Basalt	Letaba	J Codron et al (2011; Oecologia)	266m	-23.8626	31.5591	0.0636483	0.141618	0.336094	0.43568	3.58481e-05	0.00876485	0	0.0129949	0.00116506	299.83
JF0657	Faeces	Loxodonta africana	-21.5168	5.68492	47.0815	0.998556	47.1496	39.8557	October	2004	Wet	Kruger Park	North Central	Basalt	Letaba Bridge	J Codron et al (2011; Oecologia)	232m	-23.8126	31.5825	0.0611883	0.153024	0.489327	0.249001	0	0.015324	0	0.0298952	0.00224034	307.155
JF0658	Faeces	Loxodonta africana	-21.6687	6.64146	43.5565	1.37819	31.6041	38.6188	October	2004	Wet	Kruger Park	North Central	Basalt	Letaba Bridge	J Codron et al (2011; Oecologia)	232m	-23.8126	31.5825	0.0611883	0.153024	0.489327	0.249001	0	0.015324	0	0.0298952	0.00224034	307.155
JF0659	Faeces	Loxodonta africana	-24.4495	2.67976	47.9431	0.916721	52.2985	15.9658	October	2004	Wet	Kruger Park	North Central	Basalt	Twisappel	J Codron et al (2011; Oecologia)		-23.7157	31.5418	0.0196061	0.0420796	0.682772	0.252245	0	0.00231187	0	0.000985681	0	359.159
JF0673	Faeces	Loxodonta africana	-24.9018	6.53619	44.8668	1.6924	26.5107	22.7993	October	2004	Wet	Kruger Park	South Central	Granite	Ngwenyeni	J Codron et al (2011; Oecologia)	329m	-24.6096	31.6691	0.0276593	0.382928	0.370344	0.205966	0	0.00509088	0	0.00801276	0	289.279
JF0674	Faeces	Loxodonta africana	-24.2135	4.63085	50.268	1.40083	35.8844	28.1734	October	2004	Wet	Kruger Park	South Central	Granite	Ngwenyeni	J Codron et al (2011; Oecologia)	329m	-24.6096	31.6691	0.0276593	0.382928	0.370344	0.205966	0	0.00509088	0	0.00801276	0	289.279
JF0675	Faeces	Loxodonta africana	-24.5348	5.21974	45.1331	1.74181	25.9116	25.6651	October	2004	Wet	Kruger Park	South Central	Granite	Ngwenyeni	J Codron et al (2011; Oecologia)	329m	-24.6096	31.6691	0.0276593	0.382928	0.370344	0.205966	0	0.00509088	0	0.00801276	0	289.279
JF0676	Faeces	Loxodonta africana	-22.459	6.4508	44.1946	1.60958	27.4572	41.8702	October	2004	Wet	Kruger Park	South Central	Granite	Ngwenyeni	J Codron et al (2011; Oecologia)	329m	-24.6096	31.6691	0.0276593	0.382928	0.370344	0.205966	0	0.00509088	0	0.00801276	0	289.279
JF0677	Faeces	Loxodonta africana	-22.1252	5.78944	44.0953	1.29074	34.1628	44.4759	October	2004	Wet	Kruger Park	South Central	Granite	Bobbejaan Krans	J Codron et al (2011; Oecologia)	376m	-24.3886	31.6322	0.00560972	0.213151	0.562782	0.214711	0	0.00215069	0	0.0015951	0	332.717
JF0678	Faeces	Loxodonta africana	-24.0996	5.19557	43.8365	1.59847	27.4241	29.0622	October	2004	Wet	Kruger Park	South Central	Granite	Mzandzeni	J Codron et al (2011; Oecologia)	368m	-24.4795	31.6313	0.00383526	0.276802	0.281139	0.427704	0	0.00526901	0	0.00505394	0.00019714	296.511
JF0679	Faeces	Loxodonta africana	-23.3792	4.69006	47.4356	1.65447	28.6711	34.6862	October	2004	Wet	Kruger Park	South Central	Granite	Mzandzeni	J Codron et al (2011; Oecologia)	368m	-24.4795	31.6313	0.00383526	0.276802	0.281139	0.427704	0	0.00526901	0	0.00505394	0.00019714	296.511
JF0680	Faeces	Loxodonta africana	-22.1188	4.53642	47.6263	1.33319	35.7235	44.5265	October	2004	Wet	Kruger Park	South Central	Granite	Shimangwaneni	J Codron et al (2011; Oecologia)	357m	-24.5029	31.6386	0.00471326	0.338297	0.228907	0.416667	0	0.00550179	0	0.00571685	0.000197133	284.694
JF0681	Faeces	Loxodonta africana	-24.1742	4.38527	48.0625	1.45179	33.1058	28.48	October	2004	Wet	Kruger Park	South Central	Granite	Shimangwaneni	J Codron et al (2011; Oecologia)	357m	-24.5029	31.6386	0.00471326	0.338297	0.228907	0.416667	0	0.00550179	0	0.00571685	0.000197133	284.694
JF0682	Faeces	Loxodonta africana	-24.2314	5.1725	44.0637	1.62148	27.175	28.0333	October	2004	Wet	Kruger Park	South Central	Granite	Ngwenyeni	J Codron et al (2011; Oecologia)	329m	-24.6096	31.6691	0.0276593	0.382928	0.370344	0.205966	0	0.00509088	0	0.00801276	0	289.279
JF0683	Faeces	Loxodonta africana	-24.8044	5.45061	43.7259	1.12603	38.8319	20.5831	October	2004	Wet	Kruger Park	South Central	Basalt	Ntomeni	J Codron et al (2011; Oecologia)	297m	-24.2691	31.7301	0.00315469	0.00537731	0.759312	0.232085	5.37731e-05	1.79244e-05	0	0	0	374.741
JF0684	Faeces	Loxodonta africana	-24.6205	5.03334	45.1523	1.40358	32.1695	22.0425	October	2004	Wet	Kruger Park	South Central	Basalt	Ntomeni	J Codron et al (2011; Oecologia)	297m	-24.2691	31.7301	0.00315469	0.00537731	0.759312	0.232085	5.37731e-05	1.79244e-05	0	0	0	374.741
JF0685	Faeces	Loxodonta africana	-19.6078	4.53506	42.6358	1.19643	35.6357	61.8234	October	2004	Wet	Kruger Park	South Central	Basalt	Ntomeni	J Codron et al (2011; Oecologia)	297m	-24.2691	31.7301	0.00315469	0.00537731	0.759312	0.232085	5.37731e-05	1.79244e-05	0	0	0	374.741
JF0686	Faeces	Loxodonta africana	-25.4748	3.36256	49.3224	0.962226	51.2586	15.2628	October	2004	Wet	Kruger Park	South Central	Basalt	Satara	J Codron et al (2011; Oecologia)	266m	-24.6193	31.7938	0.0192528	0.318532	0.459612	0.194034	0	0.00582604	0	0.00274272	0	307.687
JF0687	Faeces	Loxodonta africana	-23.9544	4.98152	43.7541	1.2666	34.5445	27.3281	October	2004	Wet	Kruger Park	South Central	Basalt	Satara	J Codron et al (2011; Oecologia)	266m	-24.6193	31.7938	0.0192528	0.318532	0.459612	0.194034	0	0.00582604	0	0.00274272	0	307.687
JF0688	Faeces	Loxodonta africana	-21.5762	7.03673	44.8418	1.78455	25.1277	46.2016	October	2004	Wet	Kruger Park	South Central	Basalt	Kumana	J Codron et al (2011; Oecologia)	305m	-24.6125	31.7914	0.0271854	0.328572	0.457743	0.178417	0	0.00557328	0	0.00250887	0	305.055
JF0689	Faeces	Loxodonta africana	-22.0271	7.111	43.5462	1.72817	25.198	42.6236	October	2004	Wet	Kruger Park	South Central	Basalt	Kumana	J Codron et al (2011; Oecologia)	305m	-24.6125	31.7914	0.0271854	0.328572	0.457743	0.178417	0	0.00557328	0	0.00250887	0	305.055
JF0690	Faeces	Loxodonta africana	-23.2291	6.80188	47.815	1.64012	29.1533	33.0843	October	2004	Wet	Kruger Park	South Central	Basalt	Kumana	J Codron et al (2011; Oecologia)	305m	-24.6125	31.7914	0.0271854	0.328572	0.457743	0.178417	0	0.00557328	0	0.00250887	0	305.055
JF0691	Faeces	Loxodonta africana	-20.7415	5.75448	46.3009	1.11226	41.6277	52.8262	October	2004	Wet	Kruger Park	South Central	Basalt	N'watinungu	J Codron et al (2011; Oecologia)	275m	-24.6824	31.8109	0.0154715	0.0974722	0.529473	0.33806	0	0.00813912	0	0.011384	0	334.249
JF0692	Faeces	Loxodonta africana	-21.3481	6.94631	46.3995	1.38579	33.4823	48.0124	October	2004	Wet	Kruger Park	South Central	Basalt	N'watinungu	J Codron et al (2011; Oecologia)	275m	-24.6824	31.8109	0.0154715	0.0974722	0.529473	0.33806	0	0.00813912	0	0.011384	0	334.249
JF0693	Faeces	Loxodonta africana	-20.4706	5.23946	48.5899	1.80782	26.8777	57.3932	November	2004	Wet	Kruger Park	South	Granite	Maroela Loop	J Codron et al (2011; Oecologia)	272m	-24.9769	31.6234	0.107643	0.418331	0.0208834	0.418797	5.37769e-05	0.0129244	0	0.0167963	0.00457104	228.423
JF0694	Faeces	Loxodonta africana	-22.2222	6.26695	45.9424	2.32088	19.7953	43.7193	November	2004	Wet	Kruger Park	South	Granite	Sabie River	J Codron et al (2011; Oecologia)	282m	-24.9349	31.7017	0.0782535	0.463409	0.0219203	0.406162	0	0.00942771	0	0.0180847	0.00274228	231.124
JF0695	Faeces	Loxodonta africana	-22.1266	6.62556	44.4887	2.20068	20.2159	44.4654	November	2004	Wet	Kruger Park	South	Granite	Sabie River	J Codron et al (2011; Oecologia)	282m	-24.9349	31.7017	0.0782535	0.463409	0.0219203	0.406162	0	0.00942771	0	0.0180847	0.00274228	231.124
JF0696	Faeces	Loxodonta africana	-23.2087	6.78587	47.2095	2.35521	20.0447	36.0174	November	2004	Wet	Kruger Park	South	Granite	Sabie River	J Codron et al (2011; Oecologia)	282m	-24.9349	31.7017	0.0782535	0.463409	0.0219203	0.406162	0	0.00942771	0	0.0180847	0.00274228	231.124
JF0697	Faeces	Loxodonta africana	-21.9688	7.02505	45.0849	2.42222	18.613	45.6976	November	2004	Wet	Kruger Park	South	Granite	Sabie River	J Codron et al (2011; Oecologia)	282m	-24.9349	31.7017	0.0782535	0.463409	0.0219203	0.406162	0	0.00942771	0	0.0180847	0.00274228	231.124
JF0698	Faeces	Loxodonta africana	-22.555	6.93237	46.8308	2.36344	19.8147	41.1209	November	2004	Wet	Kruger Park	South	Granite	Sabie River	J Codron et al (2011; Oecologia)	282m	-24.9349	31.7017	0.0782535	0.463409	0.0219203	0.406162	0	0.00942771	0	0.0180847	0.00274228	231.124
JF0699	Faeces	Loxodonta africana	-21.5828	5.9992	46.7939	2.47362	18.9172	48.7104	November	2004	Wet	Kruger Park	South	Granite	N'watimvambu R	J Codron et al (2011; Oecologia)	214m	-25.0173	31.7822	0.0265649	0.408027	0.0648885	0.473794	0	0.0081021	0	0.0142862	0.00433785	252.355
JF0700	Faeces	Loxodonta africana	-21.3327	4.86079	46.1633	2.11982	21.777	50.6633	November	2004	Wet	Kruger Park	South	Granite	De Laporte	J Codron et al (2011; Oecologia)	308m	-25.0516	31.5755	0.0489462	0.630708	0.0364363	0.276866	0	0.00301097	0	0.00403255	0	228.671
JF0701	Faeces	Loxodonta africana	-20.442	3.23558	46.2398	2.38081	19.4219	57.6166	November	2004	Wet	Kruger Park	South	Granite	Numbi	J Codron et al (2011; Oecologia)	616m	-25.1595	31.2365	0.180882	0.563913	0.00881562	0.242286	0.000358359	0.00254435	8.95897e-05	0.00103924	7.16717e-05	207.083
JF0702	Faeces	Loxodonta africana	-20.3883	2.73436	48.4517	2.18	22.2256	58.036	November	2004	Wet	Kruger Park	South	Granite	Numbi	J Codron et al (2011; Oecologia)	616m	-25.1595	31.2365	0.180882	0.563913	0.00881562	0.242286	0.000358359	0.00254435	8.95897e-05	0.00103924	7.16717e-05	207.083
JF0703	Faeces	Loxodonta africana	-21.7484	5.80593	44.5036	2.43625	18.2673	44.8354	November	2004	Wet	Kruger Park	South	Basalt	Gomondwane	J Codron et al (2011; Oecologia)		-25.2381	31.8504	0.278777	0.615367	0.0586021	0.0456591	0	0.00146998	0	0.00010756	1.79266e-05	188.09
JF0704	Faeces	Loxodonta africana	-20.5363	4.85286	43.9734	2.24911	19.5515	54.4545	November	2004	Wet	Kruger Park	South	Basalt	Gomondwane	J Codron et al (2011; Oecologia)		-25.2381	31.8504	0.278777	0.615367	0.0586021	0.0456591	0	0.00146998	0	0.00010756	1.79266e-05	188.09
JF0705	Faeces	Loxodonta africana	-22.1056	5.79073	43.5213	1.67515	25.9806	42.0009	November	2004	Wet	Kruger Park	South	Basalt	Gomondwane	J Codron et al (2011; Oecologia)		-25.2381	31.8504	0.278777	0.615367	0.0586021	0.0456591	0	0.00146998	0	0.00010756	1.79266e-05	188.09
JF0706	Faeces	Loxodonta africana	-23.1338	5.37144	45.8458	2.34901	19.5171	33.8406	November	2004	Wet	Kruger Park	South	Basalt	Gomondwane	J Codron et al (2011; Oecologia)		-25.2381	31.8504	0.278777	0.615367	0.0586021	0.0456591	0	0.00146998	0	0.00010756	1.79266e-05	188.09
JF0707	Faeces	Loxodonta africana	-22.6177	5.76424	42.9318	1.45305	29.5459	37.9368	November	2004	Wet	Kruger Park	South	Basalt	Gomondwane	J Codron et al (2011; Oecologia)		-25.2381	31.8504	0.278777	0.615367	0.0586021	0.0456591	0	0.00146998	0	0.00010756	1.79266e-05	188.09
JF0708	Faeces	Loxodonta africana	-21.3324	5.24155	45.5946	2.18253	20.8907	48.1368	November	2004	Wet	Kruger Park	South	Basalt	Gomondwane	J Codron et al (2011; Oecologia)		-25.2381	31.8504	0.278777	0.615367	0.0586021	0.0456591	0	0.00146998	0	0.00010756	1.79266e-05	188.09
JF0709	Faeces	Loxodonta africana	-22.1384	5.74385	44.6249	2.10932	21.1561	41.7406	November	2004	Wet	Kruger Park	South	Basalt	Gomondwane	J Codron et al (2011; Oecologia)		-25.2381	31.8504	0.278777	0.615367	0.0586021	0.0456591	0	0.00146998	0	0.00010756	1.79266e-05	188.09
JF0710	Faeces	Loxodonta africana	-22.3716	5.90106	46.1234	2.26336	20.3783	39.8895	November	2004	Wet	Kruger Park	South	Basalt	Gomondwane	J Codron et al (2011; Oecologia)		-25.2381	31.8504	0.278777	0.615367	0.0586021	0.0456591	0	0.00146998	0	0.00010756	1.79266e-05	188.09
JF0711	Faeces	Loxodonta africana	-23.4676	6.33038	44.5996	2.02526	22.0217	31.1918	November	2004	Wet	Kruger Park	South	Basalt	Gomondwane	J Codron et al (2011; Oecologia)		-25.2381	31.8504	0.278777	0.615367	0.0586021	0.0456591	0	0.00146998	0	0.00010756	1.79266e-05	188.09
JF0712	Faeces	Loxodonta africana	-22.5575	5.60068	44.2537	1.96754	22.4918	38.4145	November	2004	Wet	Kruger Park	South	Basalt	Mativuhlungu	J Codron et al (2011; Oecologia)	194m	-25.1323	31.9096	0.0632696	0.378883	0.463194	0.0804044	0.000681089	0.0028319	0	0.000466008	0.0102701	291.503
JF0730	Faeces	Loxodonta africana	-21.4743	5.00711	45.8274	1.30713	35.0594	41.021	November	2004	Wet	Kruger Park	North Central	Granite	Ngwenyeni Bridge	J Codron et al (2011; Oecologia)	291m	-23.7824	31.3542	0.018349	0.052359	0.129948	0.781443	0	0.00836813	0	0.0091028	0.000430054	298.719
JF0739	Faeces	Loxodonta africana	-19.0707	5.52125	44.8418	1.33564	33.5732	59.7821	November	2004	Wet	Kruger Park	North Central	Basalt	Twisappel	J Codron et al (2011; Oecologia)		-23.7157	31.5418	0.0196061	0.0420796	0.682772	0.252245	0	0.00231187	0	0.000985681	0	359.159
JF0740	Faeces	Loxodonta africana	-18.7464	5.96516	43.4605	1.33648	32.5187	62.4236	November	2004	Wet	Kruger Park	North Central	Basalt	Twisappel	J Codron et al (2011; Oecologia)		-23.7157	31.5418	0.0196061	0.0420796	0.682772	0.252245	0	0.00231187	0	0.000985681	0	359.159
JF0741	Faeces	Loxodonta africana	-21.7498	6.51349	42.9227	1.13243	37.9032	37.9579	November	2004	Wet	Kruger Park	North Central	Basalt	Twisappel	J Codron et al (2011; Oecologia)		-23.7157	31.5418	0.0196061	0.0420796	0.682772	0.252245	0	0.00231187	0	0.000985681	0	359.159
JF0742	Faeces	Loxodonta africana	-22.791	7.58431	43.904	1.61239	27.2291	29.4763	November	2004	Wet	Kruger Park	North Central	Basalt	Twisappel	J Codron et al (2011; Oecologia)		-23.7157	31.5418	0.0196061	0.0420796	0.682772	0.252245	0	0.00231187	0	0.000985681	0	359.159
JF0753	Faeces	Loxodonta africana	-21.8494	5.75368	40.7807	1.53216	26.6165	46.6296	November	2004	Wet	Kruger Park	South Central	Granite	Timbavati	J Codron et al (2011; Oecologia)	303m	-24.2548	31.6083	0.0179215	0.0758974	0.297443	0.557877	0	0.02009	0	0.0250901	0.00568111	303.312
JF0754	Faeces	Loxodonta africana	-20.5371	5.59415	40.5442	1.55523	26.0696	56.8743	November	2004	Wet	Kruger Park	South Central	Granite	Timbavati	J Codron et al (2011; Oecologia)	303m	-24.2548	31.6083	0.0179215	0.0758974	0.297443	0.557877	0	0.02009	0	0.0250901	0.00568111	303.312
JF0755	Faeces	Loxodonta africana	-23.358	3.27858	45.7323	1.71893	26.6051	34.8519	November	2004	Wet	Kruger Park	South Central	Granite	Timbavati	J Codron et al (2011; Oecologia)	303m	-24.2548	31.6083	0.0179215	0.0758974	0.297443	0.557877	0	0.02009	0	0.0250901	0.00568111	303.312
JF0756	Faeces	Loxodonta africana	-15.0641	5.56393	38.4458	1.28338	29.9567	99.6019	November	2004	Wet	Kruger Park	South Central	Granite	Timbavati	J Codron et al (2011; Oecologia)	303m	-24.2548	31.6083	0.0179215	0.0758974	0.297443	0.557877	0	0.02009	0	0.0250901	0.00568111	303.312
JF0757	Faeces	Loxodonta africana	-21.39	6.36217	42.0743	1.47199	28.5832	50.2162	November	2004	Wet	Kruger Park	South Central	Granite	Leeubron	J Codron et al (2011; Oecologia)	332m	-24.328	31.5867	0.0224906	0.148958	0.300407	0.492446	0	0.0125625	0	0.0231179	1.79208e-05	299.937
JF0758	Faeces	Loxodonta africana	-21.7718	5.84775	39.6176	1.48578	26.6645	47.2352	November	2004	Wet	Kruger Park	South Central	Granite	Leeubron	J Codron et al (2011; Oecologia)	332m	-24.328	31.5867	0.0224906	0.148958	0.300407	0.492446	0	0.0125625	0	0.0231179	1.79208e-05	299.937
JF0759	Faeces	Loxodonta africana	-23.8478	3.94589	46.1904	1.46122	31.6109	31.0279	November	2004	Wet	Kruger Park	South Central	Granite	Bobbejaan Krans	J Codron et al (2011; Oecologia)	376m	-24.3886	31.6322	0.00560972	0.213151	0.562782	0.214711	0	0.00215069	0	0.0015951	0	332.717
JF0760	Faeces	Loxodonta africana	-23.193	4.77564	46.3812	1.80979	25.6279	36.1404	November	2004	Wet	Kruger Park	South Central	Granite	Bobbejaan Krans	J Codron et al (2011; Oecologia)	376m	-24.3886	31.6322	0.00560972	0.213151	0.562782	0.214711	0	0.00215069	0	0.0015951	0	332.717
JF0761	Faeces	Loxodonta africana	-21.1045	6.56419	41.4292	1.87068	22.1467	52.4448	November	2004	Wet	Kruger Park	South Central	Granite	Timbavati	J Codron et al (2011; Oecologia)	303m	-24.2548	31.6083	0.0179215	0.0758974	0.297443	0.557877	0	0.02009	0	0.0250901	0.00568111	303.312
JF0762	Faeces	Loxodonta africana	-22.9746	5.23621	43.6237	1.68742	25.8523	37.8452	November	2004	Wet	Kruger Park	South Central	Granite	Bobbejaan Krans	J Codron et al (2011; Oecologia)	376m	-24.3886	31.6322	0.00560972	0.213151	0.562782	0.214711	0	0.00215069	0	0.0015951	0	332.717
JF0763	Faeces	Loxodonta africana	-21.3204	6.08855	43.1403	1.64483	26.2279	48.2322	November	2004	Wet	Kruger Park	South Central	Basalt	N'wanetsi Bridge	J Codron et al (2011; Oecologia)	259m	-24.4196	31.7835	0.0317457	0.0332335	0.759137	0.161955	0	0.0111854	0	0.00270672	3.58506e-05	362.063
JF0764	Faeces	Loxodonta africana	-21.713	5.93544	44.608	1.62155	27.5094	45.1161	November	2004	Wet	Kruger Park	South Central	Basalt	N'wanetsi Bridge	J Codron et al (2011; Oecologia)	259m	-24.4196	31.7835	0.0317457	0.0332335	0.759137	0.161955	0	0.0111854	0	0.00270672	3.58506e-05	362.063
JF0765	Faeces	Loxodonta africana	-23.3394	6.47528	43.1829	1.85538	23.2744	32.2093	November	2004	Wet	Kruger Park	South Central	Basalt	N'wanetsi Bridge	J Codron et al (2011; Oecologia)	259m	-24.4196	31.7835	0.0317457	0.0332335	0.759137	0.161955	0	0.0111854	0	0.00270672	3.58506e-05	362.063
JF0766	Faeces	Loxodonta africana	-19.1648	6.60669	44.0263	2.58764	17.0141	65.3388	November	2004	Wet	Kruger Park	South Central	Basalt	Sweni	J Codron et al (2011; Oecologia)	262m	-24.4331	31.788	0.0222405	0.0284234	0.831162	0.10459	0	0.0109321	0	0.00261653	3.58429e-05	371.75
JF0767	Faeces	Loxodonta africana	-19.3766	5.78003	43.12	2.11047	20.4314	63.6578	November	2004	Wet	Kruger Park	South Central	Basalt	Sweni	J Codron et al (2011; Oecologia)	262m	-24.4331	31.788	0.0222405	0.0284234	0.831162	0.10459	0	0.0109321	0	0.00261653	3.58429e-05	371.75
JF0768	Faeces	Loxodonta africana	-21.9364	7.12703	44.6521	2.38761	18.7016	43.3433	November	2004	Wet	Kruger Park	South Central	Basalt	Sweni	J Codron et al (2011; Oecologia)	262m	-24.4331	31.788	0.0222405	0.0284234	0.831162	0.10459	0	0.0109321	0	0.00261653	3.58429e-05	371.75
JF0769	Faeces	Loxodonta africana	-19.3121	8.53399	41.4108	2.03331	20.3662	64.1697	November	2004	Wet	Kruger Park	South Central	Basalt	Kumana	J Codron et al (2011; Oecologia)	305m	-24.6125	31.7914	0.0271854	0.328572	0.457743	0.178417	0	0.00557328	0	0.00250887	0	305.055
JF0770	Faeces	Loxodonta africana	-20.0457	6.13532	43.2977	1.54506	28.0233	58.348	November	2004	Wet	Kruger Park	South Central	Basalt	N'watinungu	J Codron et al (2011; Oecologia)	275m	-24.6824	31.8109	0.0154715	0.0974722	0.529473	0.33806	0	0.00813912	0	0.011384	0	334.249
JF0771	Faeces	Loxodonta africana	-20.3083	4.86101	42.8671	1.38523	30.9457	56.2638	November	2004	Wet	Kruger Park	South Central	Basalt	N'watinungu	J Codron et al (2011; Oecologia)	275m	-24.6824	31.8109	0.0154715	0.0974722	0.529473	0.33806	0	0.00813912	0	0.011384	0	334.249
JF0772	Faeces	Loxodonta africana	-20.7046	6.36373	44.8935	1.60894	27.9025	53.1189	November	2004	Wet	Kruger Park	South Central	Basalt	N'watinungu	J Codron et al (2011; Oecologia)	275m	-24.6824	31.8109	0.0154715	0.0974722	0.529473	0.33806	0	0.00813912	0	0.011384	0	334.249
JF0773	Faeces	Loxodonta africana	-21.4277	4.91547	45.7744	2.05301	22.2962	49.9216	December	2004	Wet	Kruger Park	South	Granite	Doispane Rd	J Codron et al (2011; Oecologia)	326m	-25.0021	31.4834	0.0592674	0.49543	0.136958	0.286767	0.000627263	0.0134593	0	0.00544822	0.00204308	245.826
JF0774	Faeces	Loxodonta africana	-19.0905	4.8545	42.9552	2.12358	20.2277	68.1681	December	2004	Wet	Kruger Park	South	Granite	Doispane Rd	J Codron et al (2011; Oecologia)	326m	-25.0021	31.4834	0.0592674	0.49543	0.136958	0.286767	0.000627263	0.0134593	0	0.00544822	0.00204308	245.826
JF0775	Faeces	Loxodonta africana	-18.8047	5.28268	42.8223	2.14288	19.9835	70.3991	December	2004	Wet	Kruger Park	South	Granite	Doispane Rd	J Codron et al (2011; Oecologia)	326m	-25.0021	31.4834	0.0592674	0.49543	0.136958	0.286767	0.000627263	0.0134593	0	0.00544822	0.00204308	245.826
JF0776	Faeces	Loxodonta africana	-21.4715	5.44812	43.6681	2.4309	17.9637	49.5793	December	2004	Wet	Kruger Park	South	Granite	Albasini Rd	J Codron et al (2011; Oecologia)	483m	-25.0479	31.27	0.0313323	0.41359	0.0618226	0.484029	0	0.00458609	0	0.00207807	0.00256176	255.789
JF0777	Faeces	Loxodonta africana	-21.0082	5.26181	43.6474	2.37224	18.3992	53.1968	December	2004	Wet	Kruger Park	South	Granite	Albasini Rd	J Codron et al (2011; Oecologia)	483m	-25.0479	31.27	0.0313323	0.41359	0.0618226	0.484029	0	0.00458609	0	0.00207807	0.00256176	255.789
JF0778	Faeces	Loxodonta africana	-20.5787	5.56443	44.8352	2.33478	19.2032	56.5498	December	2004	Wet	Kruger Park	South	Granite	Albasini Rd	J Codron et al (2011; Oecologia)	483m	-25.0479	31.27	0.0313323	0.41359	0.0618226	0.484029	0	0.00458609	0	0.00207807	0.00256176	255.789
JF0781	Faeces	Loxodonta africana	-21.257	4.49587	43.3682	2.65899	16.31	51.2546	December	2004	Wet	Kruger Park	South	Granite	Renosterpan	J Codron et al (2011; Oecologia)	401m	-25.3239	31.5209	0.0027058	0.304394	0.104666	0.29857	0	0.000752607	0	0.000645092	0.288266	192.587
JF0782	Faeces	Loxodonta africana	-20.6752	4.81293	43.1946	1.91276	22.5823	55.7961	December	2004	Wet	Kruger Park	South	Granite	Renosterpan	J Codron et al (2011; Oecologia)	401m	-25.3239	31.5209	0.0027058	0.304394	0.104666	0.29857	0	0.000752607	0	0.000645092	0.288266	192.587
JF0783	Faeces	Loxodonta africana	-17.4356	4.36617	41.8067	2.23705	18.6883	79.0616	December	2004	Wet	Kruger Park	South	Basalt	H10	J Codron et al (2011; Oecologia)	367m	-25.0425	31.9074	0.0233905	0.150577	0.767655	0.0492723	0.00111127	8.96186e-05	0	1.79237e-05	0.00788644	354.298
JF0784	Faeces	Loxodonta africana	-16.7471	3.7963	44.2783	1.72084	25.7305	84.526	December	2004	Wet	Kruger Park	South	Basalt	H10	J Codron et al (2011; Oecologia)	367m	-25.0425	31.9074	0.0233905	0.150577	0.767655	0.0492723	0.00111127	8.96186e-05	0	1.79237e-05	0.00788644	354.298
JF0785	Faeces	Loxodonta africana	-18.04	3.28305	42.7903	2.56893	16.6569	74.2654	December	2004	Wet	Kruger Park	South	Basalt	H10	J Codron et al (2011; Oecologia)	367m	-25.0425	31.9074	0.0233905	0.150577	0.767655	0.0492723	0.00111127	8.96186e-05	0	1.79237e-05	0.00788644	354.298
JF0786	Faeces	Loxodonta africana	-17.9822	3.39209	42.8461	2.28096	18.7842	74.7236	December	2004	Wet	Kruger Park	South	Basalt	Mlondozi	J Codron et al (2011; Oecologia)	278m	-24.9301	31.9148	0.0211694	0.0221553	0.733079	0.223095	5.3775e-05	0.00039435	0	0	5.3775e-05	366.708
JF0787	Faeces	Loxodonta africana	-23.3965	5.73246	44.1448	1.85936	23.7419	31.7558	December	2004	Wet	Kruger Park	South	Basalt	Mlondozi	J Codron et al (2011; Oecologia)	278m	-24.9301	31.9148	0.0211694	0.0221553	0.733079	0.223095	5.3775e-05	0.00039435	0	0	5.3775e-05	366.708
JF0788	Faeces	Loxodonta africana	-15.9367	4.1568	43.1311	1.80442	23.903	90.9569	December	2004	Wet	Kruger Park	South	Basalt	Mlondozi	J Codron et al (2011; Oecologia)	278m	-24.9301	31.9148	0.0211694	0.0221553	0.733079	0.223095	5.3775e-05	0.00039435	0	0	5.3775e-05	366.708
JF0789	Faeces	Loxodonta africana	-15.6133	4.14267	41.6363	1.72456	24.1432	93.5241	December	2004	Wet	Kruger Park	South	Basalt	Mlondozi	J Codron et al (2011; Oecologia)	278m	-24.9301	31.9148	0.0211694	0.0221553	0.733079	0.223095	5.3775e-05	0.00039435	0	0	5.3775e-05	366.708
JF0790	Faeces	Loxodonta africana	-17.6995	3.98051	43.6826	2.14182	20.395	76.9679	December	2004	Wet	Kruger Park	South	Basalt	Mativuhlungu	J Codron et al (2011; Oecologia)	194m	-25.1323	31.9096	0.0632696	0.378883	0.463194	0.0804044	0.000681089	0.0028319	0	0.000466008	0.0102701	291.503
JF0791	Faeces	Loxodonta africana	-17.1026	4.81458	40.8944	1.83474	22.2889	81.7044	December	2004	Wet	Kruger Park	South	Basalt	Mativuhlungu	J Codron et al (2011; Oecologia)	194m	-25.1323	31.9096	0.0632696	0.378883	0.463194	0.0804044	0.000681089	0.0028319	0	0.000466008	0.0102701	291.503
JF0792	Faeces	Loxodonta africana	-17.5306	4.36444	42.7942	1.8514	23.1146	78.3078	December	2004	Wet	Kruger Park	South	Basalt	Mativuhlungu	J Codron et al (2011; Oecologia)	194m	-25.1323	31.9096	0.0632696	0.378883	0.463194	0.0804044	0.000681089	0.0028319	0	0.000466008	0.0102701	291.503
JF0820	Faeces	Loxodonta africana	-18.595	5.27104	42.4278	1.72718	24.5647	63.6565	December	2004	Wet	Kruger Park	North Central	Basalt	Twisappel	J Codron et al (2011; Oecologia)		-23.7157	31.5418	0.0196061	0.0420796	0.682772	0.252245	0	0.00231187	0	0.000985681	0	359.159
JF0821	Faeces	Loxodonta africana	-20.8718	4.67476	43.7247	1.66639	26.2392	45.1099	December	2004	Wet	Kruger Park	North Central	Basalt	Letaba Bridge	J Codron et al (2011; Oecologia)	232m	-23.8126	31.5825	0.0611883	0.153024	0.489327	0.249001	0	0.015324	0	0.0298952	0.00224034	307.155
JF0822	Faeces	Loxodonta africana	-21.9506	5.14189	45.2362	1.56522	28.9009	36.3223	December	2004	Wet	Kruger Park	North Central	Basalt	Letaba	J Codron et al (2011; Oecologia)	266m	-23.8626	31.5591	0.0636483	0.141618	0.336094	0.43568	3.58481e-05	0.00876485	0	0.0129949	0.00116506	299.83
JF0833	Faeces	Loxodonta africana	-17.6957	4.81519	39.4818	1.91068	20.6638	79.0574	December	2004	Wet	Kruger Park	South Central	Granite	Timbavati	J Codron et al (2011; Oecologia)	303m	-24.2548	31.6083	0.0179215	0.0758974	0.297443	0.557877	0	0.02009	0	0.0250901	0.00568111	303.312
JF0834	Faeces	Loxodonta africana	-21.487	5.76564	43.8001	2.16837	20.1996	49.4586	December	2004	Wet	Kruger Park	South Central	Granite	Timbavati	J Codron et al (2011; Oecologia)	303m	-24.2548	31.6083	0.0179215	0.0758974	0.297443	0.557877	0	0.02009	0	0.0250901	0.00568111	303.312
JF0835	Faeces	Loxodonta africana	-19.9894	4.48661	42.2651	2.15764	19.5885	61.1503	December	2004	Wet	Kruger Park	South Central	Granite	Timbavati	J Codron et al (2011; Oecologia)	303m	-24.2548	31.6083	0.0179215	0.0758974	0.297443	0.557877	0	0.02009	0	0.0250901	0.00568111	303.312
JF0836	Faeces	Loxodonta africana	-21.4013	5.18509	45.5644	2.00494	22.726	50.1275	December	2004	Wet	Kruger Park	South Central	Granite	Timbavati	J Codron et al (2011; Oecologia)	303m	-24.2548	31.6083	0.0179215	0.0758974	0.297443	0.557877	0	0.02009	0	0.0250901	0.00568111	303.312
JF0837	Faeces	Loxodonta africana	-21.9195	7.33897	36.6639	1.68399	21.772	46.0825	December	2004	Wet	Kruger Park	South Central	Granite	Timbavati	J Codron et al (2011; Oecologia)	303m	-24.2548	31.6083	0.0179215	0.0758974	0.297443	0.557877	0	0.02009	0	0.0250901	0.00568111	303.312
JF0838	Faeces	Loxodonta africana	-20.4249	3.96283	42.9375	2.29185	18.7348	57.7502	December	2004	Wet	Kruger Park	South Central	Granite	Timbavati	J Codron et al (2011; Oecologia)	303m	-24.2548	31.6083	0.0179215	0.0758974	0.297443	0.557877	0	0.02009	0	0.0250901	0.00568111	303.312
JF0839	Faeces	Loxodonta africana	-18.0268	5.06552	38.2438	1.57791	24.237	76.4724	December	2004	Wet	Kruger Park	South Central	Granite	Timbavati	J Codron et al (2011; Oecologia)	303m	-24.2548	31.6083	0.0179215	0.0758974	0.297443	0.557877	0	0.02009	0	0.0250901	0.00568111	303.312
JF0840	Faeces	Loxodonta africana	-18.387	4.79809	45.1165	1.99803	22.5805	73.6604	December	2004	Wet	Kruger Park	South Central	Granite	Timbavati	J Codron et al (2011; Oecologia)	303m	-24.2548	31.6083	0.0179215	0.0758974	0.297443	0.557877	0	0.02009	0	0.0250901	0.00568111	303.312
JF0841	Faeces	Loxodonta africana	-18.077	5.53106	43.383	1.86588	23.2508	76.0804	December	2004	Wet	Kruger Park	South Central	Granite	Timbavati	J Codron et al (2011; Oecologia)	303m	-24.2548	31.6083	0.0179215	0.0758974	0.297443	0.557877	0	0.02009	0	0.0250901	0.00568111	303.312
JF0842	Faeces	Loxodonta africana	-18.9235	6.0325	44.2868	2.06619	21.4341	69.4715	December	2004	Wet	Kruger Park	South Central	Granite	Timbavati	J Codron et al (2011; Oecologia)	303m	-24.2548	31.6083	0.0179215	0.0758974	0.297443	0.557877	0	0.02009	0	0.0250901	0.00568111	303.312
JF0843	Faeces	Loxodonta africana	-18.0225	6.8221	45.0201	2.18985	20.5586	74.4044	December	2004	Wet	Kruger Park	South Central	Basalt	Sweni	J Codron et al (2011; Oecologia)	262m	-24.4331	31.788	0.0222405	0.0284234	0.831162	0.10459	0	0.0109321	0	0.00261653	3.58429e-05	371.75
JF0844	Faeces	Loxodonta africana	-20.9276	6.94614	45.4973	2.08792	21.7907	51.3491	December	2004	Wet	Kruger Park	South Central	Basalt	Sweni	J Codron et al (2011; Oecologia)	262m	-24.4331	31.788	0.0222405	0.0284234	0.831162	0.10459	0	0.0109321	0	0.00261653	3.58429e-05	371.75
JF0845	Faeces	Loxodonta africana	-20.5914	6.09706	41.2428	1.68213	24.5182	54.0174	December	2004	Wet	Kruger Park	South Central	Basalt	Nkaya	J Codron et al (2011; Oecologia)	310m	-24.5393	31.7662	0.0166708	0.351916	0.51106	0.117771	0	0.000591546	0	0.00198975	0	311.806
JF0846	Faeces	Loxodonta africana	-19.8299	7.08352	45.4253	2.28282	19.8987	60.0605	December	2004	Wet	Kruger Park	South Central	Basalt	Nkaya	J Codron et al (2011; Oecologia)	310m	-24.5393	31.7662	0.0166708	0.351916	0.51106	0.117771	0	0.000591546	0	0.00198975	0	311.806
JF0847	Faeces	Loxodonta africana	-17.977	5.75897	43.6742	2.53615	17.2207	74.7652	December	2004	Wet	Kruger Park	South Central	Basalt	Nkaya	J Codron et al (2011; Oecologia)	310m	-24.5393	31.7662	0.0166708	0.351916	0.51106	0.117771	0	0.000591546	0	0.00198975	0	311.806
JF0848	Faeces	Loxodonta africana	-21.5066	7.71081	45.7878	2.42685	18.8672	46.7545	December	2004	Wet	Kruger Park	South Central	Basalt	Kumana	J Codron et al (2011; Oecologia)	305m	-24.6125	31.7914	0.0271854	0.328572	0.457743	0.178417	0	0.00557328	0	0.00250887	0	305.055
JF0849	Faeces	Loxodonta africana	-20.1313	6.45783	46.7622	2.6691	17.5198	57.6688	December	2004	Wet	Kruger Park	South Central	Basalt	Kumana	J Codron et al (2011; Oecologia)	305m	-24.6125	31.7914	0.0271854	0.328572	0.457743	0.178417	0	0.00557328	0	0.00250887	0	305.055
JF0850	Faeces	Loxodonta africana	-16.9989	6.16033	44.1985	1.53708	28.7547	82.5279	December	2004	Wet	Kruger Park	South Central	Basalt	N'watinungu	J Codron et al (2011; Oecologia)	275m	-24.6824	31.8109	0.0154715	0.0974722	0.529473	0.33806	0	0.00813912	0	0.011384	0	334.249
JF0851	Faeces	Loxodonta africana	-16.3768	5.65927	41.4703	1.61003	25.7576	87.4646	December	2004	Wet	Kruger Park	South Central	Basalt	N'watinungu	J Codron et al (2011; Oecologia)	275m	-24.6824	31.8109	0.0154715	0.0974722	0.529473	0.33806	0	0.00813912	0	0.011384	0	334.249
JF0852	Faeces	Loxodonta africana	-15.9578	6.02964	44.4344	1.72421	25.7708	90.7897	December	2004	Wet	Kruger Park	South Central	Basalt	Mazithi	J Codron et al (2011; Oecologia)	265m	-24.7217	31.8356	0.0046073	0.0572059	0.414872	0.511733	0	0.00709919	0	0.00444596	3.58545e-05	331.371
JF0863	Faeces	Loxodonta africana	-22.4172	6.61398	45.5872	1.70472	26.7418	42.1968	January	2005	Wet	Kruger Park	South	Granite	Sabie River	J Codron et al (2011; Oecologia)	282m	-24.9349	31.7017	0.0782535	0.463409	0.0219203	0.406162	0	0.00942771	0	0.0180847	0.00274228	231.124
JF0864	Faeces	Loxodonta africana	-22.355	7.56855	47.0135	1.82345	25.7828	42.6821	January	2005	Wet	Kruger Park	South	Granite	Sabie River	J Codron et al (2011; Oecologia)	282m	-24.9349	31.7017	0.0782535	0.463409	0.0219203	0.406162	0	0.00942771	0	0.0180847	0.00274228	231.124
JF0865	Faeces	Loxodonta africana	-22.5883	6.71538	45.5604	1.68376	27.0587	40.8607	January	2005	Wet	Kruger Park	South	Granite	Sabie River	J Codron et al (2011; Oecologia)	282m	-24.9349	31.7017	0.0782535	0.463409	0.0219203	0.406162	0	0.00942771	0	0.0180847	0.00274228	231.124
JF0866	Faeces	Loxodonta africana	-22.3235	7.62394	44.7543	1.7785	25.1641	42.928	January	2005	Wet	Kruger Park	South	Granite	Sabie River	J Codron et al (2011; Oecologia)	282m	-24.9349	31.7017	0.0782535	0.463409	0.0219203	0.406162	0	0.00942771	0	0.0180847	0.00274228	231.124
JF0867	Faeces	Loxodonta africana	-22.0129	6.66031	42.6103	1.64017	25.9792	45.3527	January	2005	Wet	Kruger Park	South	Granite	Sabie River	J Codron et al (2011; Oecologia)	282m	-24.9349	31.7017	0.0782535	0.463409	0.0219203	0.406162	0	0.00942771	0	0.0180847	0.00274228	231.124
JF0868	Faeces	Loxodonta africana	-22.8156	7.44878	39.3874	1.51092	26.0684	39.0867	January	2005	Wet	Kruger Park	South	Granite	Sabie River	J Codron et al (2011; Oecologia)	282m	-24.9349	31.7017	0.0782535	0.463409	0.0219203	0.406162	0	0.00942771	0	0.0180847	0.00274228	231.124
JF0869	Faeces	Loxodonta africana	-22.6925	7.55946	40.7509	1.39581	29.1951	40.0476	January	2005	Wet	Kruger Park	South	Granite	Sabie River	J Codron et al (2011; Oecologia)	282m	-24.9349	31.7017	0.0782535	0.463409	0.0219203	0.406162	0	0.00942771	0	0.0180847	0.00274228	231.124
JF0870	Faeces	Loxodonta africana	-21.1032	6.80499	44.5372	1.76415	25.2456	52.4548	January	2005	Wet	Kruger Park	South	Granite	Sabie River	J Codron et al (2011; Oecologia)	282m	-24.9349	31.7017	0.0782535	0.463409	0.0219203	0.406162	0	0.00942771	0	0.0180847	0.00274228	231.124
JF0871	Faeces	Loxodonta africana	-23.3564	6.88372	46.5477	2.04031	22.814	34.8646	January	2005	Wet	Kruger Park	South	Granite	Sabie River	J Codron et al (2011; Oecologia)	282m	-24.9349	31.7017	0.0782535	0.463409	0.0219203	0.406162	0	0.00942771	0	0.0180847	0.00274228	231.124
JF0872	Faeces	Loxodonta africana	-23.3559	7.4604	45.9155	1.78871	25.6696	34.8687	January	2005	Wet	Kruger Park	South	Granite	Sabie River	J Codron et al (2011; Oecologia)	282m	-24.9349	31.7017	0.0782535	0.463409	0.0219203	0.406162	0	0.00942771	0	0.0180847	0.00274228	231.124
JF0873	Faeces	Loxodonta africana	-21.8347	4.35987	29.8969	1.58682	18.8407	44.1504	January	2005	Wet	Kruger Park	South	Basalt	Nthandanyathi	J Codron et al (2011; Oecologia)	181m	-25.1997	31.9544	0.0180834	0.0544474	0.860799	0.0663477	0	0	0	0	0.000322598	376.922
JF0874	Faeces	Loxodonta africana	-22.4061	4.49655	44.2804	1.74184	25.4217	39.6156	January	2005	Wet	Kruger Park	South	Basalt	Hlanganzwane	J Codron et al (2011; Oecologia)	238m	-25.2367	31.9857	0.0254755	0.144445	0.761953	0.066871	0	0	0	0	0.00125495	356.279
JF0875	Faeces	Loxodonta africana	-21.8738	5.32975	34.0446	1.56201	21.7954	43.8401	January	2005	Wet	Kruger Park	South	Basalt	Hlanganzwane	J Codron et al (2011; Oecologia)	238m	-25.2367	31.9857	0.0254755	0.144445	0.761953	0.066871	0	0	0	0	0.00125495	356.279
JF0876	Faeces	Loxodonta africana	-20.8651	6.03795	37.3564	1.8314	20.3978	51.8453	January	2005	Wet	Kruger Park	South	Basalt	Crocodile River	J Codron et al (2011; Oecologia)	251m	-25.3418	31.9405	0.112681	0.0695156	0.526315	0.0388269	0.241763	0.00367476	0.000609472	0.00360305	0.00301151	247.345
JF0877	Faeces	Loxodonta africana	-22.704	5.39376	37.1187	1.63623	22.6854	37.2519	January	2005	Wet	Kruger Park	South	Basalt	Crocodile River	J Codron et al (2011; Oecologia)	251m	-25.3418	31.9405	0.112681	0.0695156	0.526315	0.0388269	0.241763	0.00367476	0.000609472	0.00360305	0.00301151	247.345
JF0878	Faeces	Loxodonta africana	-22.3136	7.44498	41.059	1.67322	24.5389	40.35	January	2005	Wet	Kruger Park	South	Basalt	Crocodile River	J Codron et al (2011; Oecologia)	251m	-25.3418	31.9405	0.112681	0.0695156	0.526315	0.0388269	0.241763	0.00367476	0.000609472	0.00360305	0.00301151	247.345
JF0879	Faeces	Loxodonta africana	-20.9858	5.96836	42.6822	1.92174	22.2102	50.8871	January	2005	Wet	Kruger Park	South	Basalt	Cezantfombi	J Codron et al (2011; Oecologia)	163m	-25.3329	31.8799	0.0735038	0.174233	0.642088	0.0838456	0.015916	0.00243758	0	0.00245551	0.00552041	324.186
JF0880	Faeces	Loxodonta africana	-21.8632	4.4624	37.5861	1.75867	21.3719	43.9239	January	2005	Wet	Kruger Park	South	Basalt	Cezantfombi	J Codron et al (2011; Oecologia)	163m	-25.3329	31.8799	0.0735038	0.174233	0.642088	0.0838456	0.015916	0.00243758	0	0.00245551	0.00552041	324.186
JF0881	Faeces	Loxodonta africana	-21.3853	4.99368	38.7304	1.99261	19.4371	47.7168	January	2005	Wet	Kruger Park	South	Basalt	Cezantfombi	J Codron et al (2011; Oecologia)	163m	-25.3329	31.8799	0.0735038	0.174233	0.642088	0.0838456	0.015916	0.00243758	0	0.00245551	0.00552041	324.186
JF0882	Faeces	Loxodonta africana	-21.4536	4.76002	46.2113	1.6981	27.2135	47.1751	January	2005	Wet	Kruger Park	South	Basalt	Cezantfombi	J Codron et al (2011; Oecologia)	163m	-25.3329	31.8799	0.0735038	0.174233	0.642088	0.0838456	0.015916	0.00243758	0	0.00245551	0.00552041	324.186
JF0894	Faeces	Loxodonta africana	-20.7724	5.46174	45.5393	1.75607	25.9324	47.3099	January	2005	Wet	Kruger Park	North Central	Granite	Letaba Bridge 2	J Codron et al (2011; Oecologia)	264m	-23.7597	31.3709	0.0474834	0.113548	0.0353886	0.773495	0	0.0130266	0	0.0129907	0.00406744	273.662
JF0895	Faeces	Loxodonta africana	-20.266	5.58066	43.9245	1.8211	24.1198	51.847	January	2005	Wet	Kruger Park	North Central	Granite	Letaba Bridge 2	J Codron et al (2011; Oecologia)	264m	-23.7597	31.3709	0.0474834	0.113548	0.0353886	0.773495	0	0.0130266	0	0.0129907	0.00406744	273.662
JF0896	Faeces	Loxodonta africana	-20.7155	5.58581	41.9407	1.65746	25.3042	47.8196	January	2005	Wet	Kruger Park	North Central	Granite	Letaba Bridge 2	J Codron et al (2011; Oecologia)	264m	-23.7597	31.3709	0.0474834	0.113548	0.0353886	0.773495	0	0.0130266	0	0.0129907	0.00406744	273.662
JF0897	Faeces	Loxodonta africana	-19.8197	4.52277	35.3311	1.66041	21.2786	55.8452	January	2005	Wet	Kruger Park	North Central	Granite	Letaba Bridge 2	J Codron et al (2011; Oecologia)	264m	-23.7597	31.3709	0.0474834	0.113548	0.0353886	0.773495	0	0.0130266	0	0.0129907	0.00406744	273.662
JF0898	Faeces	Loxodonta africana	-19.934	5.94337	45.084	1.50885	29.8797	54.8218	January	2005	Wet	Kruger Park	North Central	Granite	Letaba Bridge 2	J Codron et al (2011; Oecologia)	264m	-23.7597	31.3709	0.0474834	0.113548	0.0353886	0.773495	0	0.0130266	0	0.0129907	0.00406744	273.662
JF0899	Faeces	Loxodonta africana	-20.1693	6.15865	44.4172	1.78885	24.8301	52.713	January	2005	Wet	Kruger Park	North Central	Granite	Letaba Bridge 2	J Codron et al (2011; Oecologia)	264m	-23.7597	31.3709	0.0474834	0.113548	0.0353886	0.773495	0	0.0130266	0	0.0129907	0.00406744	273.662
JF0900	Faeces	Loxodonta africana	-21.2854	6.10198	45.7666	1.84894	24.7528	42.7136	January	2005	Wet	Kruger Park	North Central	Granite	Letaba Bridge 2	J Codron et al (2011; Oecologia)	264m	-23.7597	31.3709	0.0474834	0.113548	0.0353886	0.773495	0	0.0130266	0	0.0129907	0.00406744	273.662
JF0901	Faeces	Loxodonta africana	-19.6756	5.02881	46.2298	1.61563	28.614	57.1365	January	2005	Wet	Kruger Park	North Central	Granite	Letaba Bridge 2	J Codron et al (2011; Oecologia)	264m	-23.7597	31.3709	0.0474834	0.113548	0.0353886	0.773495	0	0.0130266	0	0.0129907	0.00406744	273.662
JF0903	Faeces	Loxodonta africana	-18.9286	4.13994	42.5202	1.79518	23.6858	60.9395	January	2005	Wet	Kruger Park	North Central	Basalt	Letaba	J Codron et al (2011; Oecologia)	266m	-23.8626	31.5591	0.0636483	0.141618	0.336094	0.43568	3.58481e-05	0.00876485	0	0.0129949	0.00116506	299.83
JF0904	Faeces	Loxodonta africana	-20.382	6.27759	43.9436	1.85954	23.6314	49.1001	January	2005	Wet	Kruger Park	North Central	Basalt	Letaba	J Codron et al (2011; Oecologia)	266m	-23.8626	31.5591	0.0636483	0.141618	0.336094	0.43568	3.58481e-05	0.00876485	0	0.0129949	0.00116506	299.83
JF0907	Faeces	Loxodonta africana	-19.2967	5.40848	42.1418	2.0913	20.151	57.9406	January	2005	Wet	Kruger Park	North Central	Basalt	Letaba Bridge	J Codron et al (2011; Oecologia)	232m	-23.8126	31.5825	0.0611883	0.153024	0.489327	0.249001	0	0.015324	0	0.0298952	0.00224034	307.155
JF0908	Faeces	Loxodonta africana	-18.7145	5.3422	44.2444	1.45207	30.4698	62.6834	January	2005	Wet	Kruger Park	North Central	Basalt	Twisappel	J Codron et al (2011; Oecologia)		-23.7157	31.5418	0.0196061	0.0420796	0.682772	0.252245	0	0.00231187	0	0.000985681	0	359.159
JF0909	Faeces	Loxodonta africana	-19.9813	5.0976	42.762	1.6586	25.782	52.3643	January	2005	Wet	Kruger Park	North Central	Basalt	Twisappel	J Codron et al (2011; Oecologia)		-23.7157	31.5418	0.0196061	0.0420796	0.682772	0.252245	0	0.00231187	0	0.000985681	0	359.159
JF0910	Faeces	Loxodonta africana	-19.9619	3.49851	41.872	1.5749	26.5871	52.5221	January	2005	Wet	Kruger Park	North Central	Basalt	Twisappel	J Codron et al (2011; Oecologia)		-23.7157	31.5418	0.0196061	0.0420796	0.682772	0.252245	0	0.00231187	0	0.000985681	0	359.159
JF0911	Faeces	Loxodonta africana	-17.8453	4.8869	42.3247	1.26616	33.4275	69.7638	January	2005	Wet	Kruger Park	North Central	Basalt	Twisappel	J Codron et al (2011; Oecologia)		-23.7157	31.5418	0.0196061	0.0420796	0.682772	0.252245	0	0.00231187	0	0.000985681	0	359.159
JF0923	Faeces	Loxodonta africana	-20.9072	5.16366	32.664	1.69422	19.2797	53.9848	January	2005	Wet	Kruger Park	South Central	Granite	Mantimahle	J Codron et al (2011; Oecologia)	287m	-24.8998	31.7372	0.0317176	0.279545	0.237756	0.442075	0	0.000860138	0	0.00804587	0	286.806
JF0924	Faeces	Loxodonta africana	-21.8006	5.65008	24.6711	1.10673	22.292	47.0106	January	2005	Wet	Kruger Park	South Central	Granite	Mantimahle	J Codron et al (2011; Oecologia)	287m	-24.8998	31.7372	0.0317176	0.279545	0.237756	0.442075	0	0.000860138	0	0.00804587	0	286.806
JF0925	Faeces	Loxodonta africana	-21.2229	4.83451	44.6284	1.88462	23.6803	51.5206	January	2005	Wet	Kruger Park	South Central	Granite	Mantimahle	J Codron et al (2011; Oecologia)	287m	-24.8998	31.7372	0.0317176	0.279545	0.237756	0.442075	0	0.000860138	0	0.00804587	0	286.806
JF0926	Faeces	Loxodonta africana	-20.088	4.38549	37.1681	1.51045	24.6073	60.3805	January	2005	Wet	Kruger Park	South Central	Granite	Mantimahle	J Codron et al (2011; Oecologia)	287m	-24.8998	31.7372	0.0317176	0.279545	0.237756	0.442075	0	0.000860138	0	0.00804587	0	286.806
JF0927	Faeces	Loxodonta africana	-20.3961	4.52669	33.9994	1.19159	28.5328	57.9752	January	2005	Wet	Kruger Park	South Central	Granite	Mantimahle	J Codron et al (2011; Oecologia)	287m	-24.8998	31.7372	0.0317176	0.279545	0.237756	0.442075	0	0.000860138	0	0.00804587	0	286.806
JF0928	Faeces	Loxodonta africana	-19.8004	7.81408	42.7468	1.86122	22.9671	62.626	January	2005	Wet	Kruger Park	South Central	Granite	Mantimahle	J Codron et al (2011; Oecologia)	287m	-24.8998	31.7372	0.0317176	0.279545	0.237756	0.442075	0	0.000860138	0	0.00804587	0	286.806
JF0929	Faeces	Loxodonta africana	-20.0288	7.34884	34.6597	1.62452	21.3353	60.8427	January	2005	Wet	Kruger Park	South Central	Granite	Mantimahle	J Codron et al (2011; Oecologia)	287m	-24.8998	31.7372	0.0317176	0.279545	0.237756	0.442075	0	0.000860138	0	0.00804587	0	286.806
JF0930	Faeces	Loxodonta africana	-20.3315	7.49378	39.8414	1.99036	20.0172	58.4793	January	2005	Wet	Kruger Park	South Central	Granite	Mantimahle	J Codron et al (2011; Oecologia)	287m	-24.8998	31.7372	0.0317176	0.279545	0.237756	0.442075	0	0.000860138	0	0.00804587	0	286.806
JF0931	Faeces	Loxodonta africana	-20.8992	7.78366	27.7471	1.40549	19.742	54.048	January	2005	Wet	Kruger Park	South Central	Granite	Mantimahle	J Codron et al (2011; Oecologia)	287m	-24.8998	31.7372	0.0317176	0.279545	0.237756	0.442075	0	0.000860138	0	0.00804587	0	286.806
JF0932	Faeces	Loxodonta africana	-22.6	5.10701	26.6195	1.25685	21.1795	40.7697	January	2005	Wet	Kruger Park	South Central	Granite	Mantimahle	J Codron et al (2011; Oecologia)	287m	-24.8998	31.7372	0.0317176	0.279545	0.237756	0.442075	0	0.000860138	0	0.00804587	0	286.806
JF0933	Faeces	Loxodonta africana	-19.2746	5.32535	42.1425	1.6944	24.8717	64.4672	January	2005	Wet	Kruger Park	South Central	Basalt	Ntomeni	J Codron et al (2011; Oecologia)	297m	-24.2691	31.7301	0.00315469	0.00537731	0.759312	0.232085	5.37731e-05	1.79244e-05	0	0	0	374.741
JF0934	Faeces	Loxodonta africana	-18.0081	5.20131	39.2673	1.46324	26.8359	74.5187	January	2005	Wet	Kruger Park	South Central	Basalt	N'watinungu	J Codron et al (2011; Oecologia)	275m	-24.6824	31.8109	0.0154715	0.0974722	0.529473	0.33806	0	0.00813912	0	0.011384	0	334.249
JF0935	Faeces	Loxodonta africana	-25.3153	7.04595	35.2937	1.86922	18.8815	16.5282	January	2005	Wet	Kruger Park	South Central	Basalt	N'watinungu	J Codron et al (2011; Oecologia)	275m	-24.6824	31.8109	0.0154715	0.0974722	0.529473	0.33806	0	0.00813912	0	0.011384	0	334.249
JF0936	Faeces	Loxodonta africana	-19.7695	6.80531	33.0108	1.66276	19.853	60.5398	January	2005	Wet	Kruger Park	South Central	Basalt	N'watinungu	J Codron et al (2011; Oecologia)	275m	-24.6824	31.8109	0.0154715	0.0974722	0.529473	0.33806	0	0.00813912	0	0.011384	0	334.249
JF0937	Faeces	Loxodonta africana	-18.3538	6.06765	42.5219	1.76846	24.0446	71.7747	January	2005	Wet	Kruger Park	South Central	Basalt	N'watinungu	J Codron et al (2011; Oecologia)	275m	-24.6824	31.8109	0.0154715	0.0974722	0.529473	0.33806	0	0.00813912	0	0.011384	0	334.249
JF0938	Faeces	Loxodonta africana	-21.5469	7.00247	39.4793	1.68873	23.3781	46.4342	January	2005	Wet	Kruger Park	South Central	Basalt	Kumana	J Codron et al (2011; Oecologia)	305m	-24.6125	31.7914	0.0271854	0.328572	0.457743	0.178417	0	0.00557328	0	0.00250887	0	305.055
JF0939	Faeces	Loxodonta africana	-21.0612	6.35284	35.6491	1.86055	19.1605	50.289	January	2005	Wet	Kruger Park	South Central	Basalt	Nkaya	J Codron et al (2011; Oecologia)	310m	-24.5393	31.7662	0.0166708	0.351916	0.51106	0.117771	0	0.000591546	0	0.00198975	0	311.806
JF0940	Faeces	Loxodonta africana	-19.849	5.77063	36.5005	1.43914	25.3627	59.9091	January	2005	Wet	Kruger Park	South Central	Basalt	Satara	J Codron et al (2011; Oecologia)	266m	-24.6193	31.7938	0.0192528	0.318532	0.459612	0.194034	0	0.00582604	0	0.00274272	0	307.687
JF0941	Faeces	Loxodonta africana	-20.5956	5.71114	43.8229	1.61541	27.1281	53.9837	January	2005	Wet	Kruger Park	South Central	Basalt	Satara	J Codron et al (2011; Oecologia)	266m	-24.6193	31.7938	0.0192528	0.318532	0.459612	0.194034	0	0.00582604	0	0.00274272	0	307.687
JF0942	Faeces	Loxodonta africana	-20.1766	5.81873	40.5033	1.77245	22.8516	57.3094	January	2005	Wet	Kruger Park	South Central	Basalt	Ntomeni	J Codron et al (2011; Oecologia)	297m	-24.2691	31.7301	0.00315469	0.00537731	0.759312	0.232085	5.37731e-05	1.79244e-05	0	0	0	374.741
KF0078	Faeces	Loxodonta africana	-24.253	5.79025	37.0729	2.2076	16.7933	20.4494	June	2002	Dry	Kruger Park	South	Basalt	Crocodile River	J Codron et al (2006; Jmamm)	251m	-25.3418	31.9405	0.112681	0.0695156	0.526315	0.0388269	0.241763	0.00367476	0.000609472	0.00360305	0.00301151	247.345
KF0098	Faeces	Loxodonta africana	-24.8039	6.17385	41.4452	1.91541	21.6378	16.7524	June	2002	Dry	Kruger Park	South	Granite	Renosterkoppies	J Codron et al (2006; Jmamm)	282m	-25.072	31.6105	0.0674407	0.660467	0.0100158	0.254856	3.58346e-05	0.00172006	0	0.00542894	3.58346e-05	219.301
KF0099	Faeces	Loxodonta africana	-25.1286	7.04814	38.8936	1.91849	20.2731	14.5733	June	2002	Dry	Kruger Park	South	Granite	Renosterkoppies	J Codron et al (2006; Jmamm)	282m	-25.072	31.6105	0.0674407	0.660467	0.0100158	0.254856	3.58346e-05	0.00172006	0	0.00542894	3.58346e-05	219.301
KF0157	Faeces	Loxodonta africana	-24.1	4.37238	48.2167	0.881822	54.6785	21.4766	June	2002	Dry	Kruger Park	South	Granite	Maroela Loop	J Codron et al (2006; Jmamm)	272m	-24.9769	31.6234	0.107643	0.418331	0.0208834	0.418797	5.37769e-05	0.0129244	0	0.0167963	0.00457104	228.423
KF0158	Faeces	Loxodonta africana	-26.3572	4.22255	48.3188	0.985011	49.0541	6.3277	June	2002	Dry	Kruger Park	South	Granite	Maroela Loop	J Codron et al (2006; Jmamm)	272m	-24.9769	31.6234	0.107643	0.418331	0.0208834	0.418797	5.37769e-05	0.0129244	0	0.0167963	0.00457104	228.423
KF0159	Faeces	Loxodonta africana	-26.6898	4.19701	47.9127	0.880154	54.4367	4.095	June	2002	Dry	Kruger Park	South	Granite	Maroela Loop	J Codron et al (2006; Jmamm)	272m	-24.9769	31.6234	0.107643	0.418331	0.0208834	0.418797	5.37769e-05	0.0129244	0	0.0167963	0.00457104	228.423
KF0160	Faeces	Loxodonta africana	-27.0267	5.86831	45.951	1.131	40.6287	1.83436	June	2002	Dry	Kruger Park	South	Granite	Maroela Loop	J Codron et al (2006; Jmamm)	272m	-24.9769	31.6234	0.107643	0.418331	0.0208834	0.418797	5.37769e-05	0.0129244	0	0.0167963	0.00457104	228.423
KF0161	Faeces	Loxodonta africana	-26.4411	4.02923	48.2473	0.955404	50.4993	5.76446	June	2002	Dry	Kruger Park	South	Granite	Maroela Loop	J Codron et al (2006; Jmamm)	272m	-24.9769	31.6234	0.107643	0.418331	0.0208834	0.418797	5.37769e-05	0.0129244	0	0.0167963	0.00457104	228.423
KF0162	Faeces	Loxodonta africana	-26.3433	5.32032	49.7987	1.49368	33.3397	6.42062	June	2002	Dry	Kruger Park	South	Granite	Maroela Loop	J Codron et al (2006; Jmamm)	272m	-24.9769	31.6234	0.107643	0.418331	0.0208834	0.418797	5.37769e-05	0.0129244	0	0.0167963	0.00457104	228.423
KF0163	Faeces	Loxodonta africana	-26.892	2.95196	50.0797	0.960034	52.1645	2.7385	June	2002	Dry	Kruger Park	South	Granite	Maroela Loop	J Codron et al (2006; Jmamm)	272m	-24.9769	31.6234	0.107643	0.418331	0.0208834	0.418797	5.37769e-05	0.0129244	0	0.0167963	0.00457104	228.423
KF0164	Faeces	Loxodonta africana	-26.9738	4.58081	44.8669	0.882522	50.8394	2.1896	June	2002	Dry	Kruger Park	South	Granite	Maroela Loop	J Codron et al (2006; Jmamm)	272m	-24.9769	31.6234	0.107643	0.418331	0.0208834	0.418797	5.37769e-05	0.0129244	0	0.0167963	0.00457104	228.423
KF0165	Faeces	Loxodonta africana	-25.2985	5.22328	44.8859	1.06679	42.0755	13.4328	June	2002	Dry	Kruger Park	South	Granite	Maroela Loop	J Codron et al (2006; Jmamm)	272m	-24.9769	31.6234	0.107643	0.418331	0.0208834	0.418797	5.37769e-05	0.0129244	0	0.0167963	0.00457104	228.423
KF0166	Faeces	Loxodonta africana	-26.7945	6.52746	46.8012	1.32819	35.2369	3.39252	June	2002	Dry	Kruger Park	South	Granite	Maroela Loop	J Codron et al (2006; Jmamm)	272m	-24.9769	31.6234	0.107643	0.418331	0.0208834	0.418797	5.37769e-05	0.0129244	0	0.0167963	0.00457104	228.423
KF0167	Faeces	Loxodonta africana	-25.8645	5.27133	46.0349	0.875075	52.6069	9.63438	June	2002	Dry	Kruger Park	South	Granite	Maroela Loop	J Codron et al (2006; Jmamm)	272m	-24.9769	31.6234	0.107643	0.418331	0.0208834	0.418797	5.37769e-05	0.0129244	0	0.0167963	0.00457104	228.423
KF0168	Faeces	Loxodonta africana	-26.3027	4.91945	37.5932	0.829854	45.3009	6.69344	June	2002	Dry	Kruger Park	South	Granite	Maroela Loop	J Codron et al (2006; Jmamm)	272m	-24.9769	31.6234	0.107643	0.418331	0.0208834	0.418797	5.37769e-05	0.0129244	0	0.0167963	0.00457104	228.423
KF0169	Faeces	Loxodonta africana	-26.447	5.4687	43.036	1.07308	40.1051	5.72455	June	2002	Dry	Kruger Park	South	Granite	Maroela Loop	J Codron et al (2006; Jmamm)	272m	-24.9769	31.6234	0.107643	0.418331	0.0208834	0.418797	5.37769e-05	0.0129244	0	0.0167963	0.00457104	228.423
KF0170	Faeces	Loxodonta africana	-26.4414	3.45445	47.2904	0.991683	47.687	5.76224	June	2002	Dry	Kruger Park	South	Granite	Maroela Loop	J Codron et al (2006; Jmamm)	272m	-24.9769	31.6234	0.107643	0.418331	0.0208834	0.418797	5.37769e-05	0.0129244	0	0.0167963	0.00457104	228.423
KF0171	Faeces	Loxodonta africana	-26.3944	5.37794	43.7271	0.877963	49.8051	6.07798	June	2002	Dry	Kruger Park	South	Granite	Maroela Loop	J Codron et al (2006; Jmamm)	272m	-24.9769	31.6234	0.107643	0.418331	0.0208834	0.418797	5.37769e-05	0.0129244	0	0.0167963	0.00457104	228.423
KF0172	Faeces	Loxodonta africana	-26.8959	3.93292	42.9058	0.985976	43.516	2.71206	June	2002	Dry	Kruger Park	South	Granite	Maroela Loop	J Codron et al (2006; Jmamm)	272m	-24.9769	31.6234	0.107643	0.418331	0.0208834	0.418797	5.37769e-05	0.0129244	0	0.0167963	0.00457104	228.423
KF0173	Faeces	Loxodonta africana	-25.0859	6.54681	39.5946	1.34533	29.4311	14.8598	June	2002	Dry	Kruger Park	South	Granite	Salitje Road	J Codron et al (2006; Jmamm)		-24.9513	31.7218	0.072038	0.40656	0.0238573	0.471411	8.96218e-05	0.00989425	0	0.0133716	0.00277828	239.482
KF0174	Faeces	Loxodonta africana	-26.3854	4.61229	42.3483	1.16577	36.3264	6.13831	June	2002	Dry	Kruger Park	South	Granite	Salitje Road	J Codron et al (2006; Jmamm)		-24.9513	31.7218	0.072038	0.40656	0.0238573	0.471411	8.96218e-05	0.00989425	0	0.0133716	0.00277828	239.482
KF0175	Faeces	Loxodonta africana	-26.5672	5.06041	38.2244	0.950144	40.2301	4.91799	June	2002	Dry	Kruger Park	South	Granite	Salitje Road	J Codron et al (2006; Jmamm)		-24.9513	31.7218	0.072038	0.40656	0.0238573	0.471411	8.96218e-05	0.00989425	0	0.0133716	0.00277828	239.482
KF0176	Faeces	Loxodonta africana	-26.0528	6.13259	42.9792	1.15006	37.3712	8.37074	June	2002	Dry	Kruger Park	South	Granite	Salitje Road	J Codron et al (2006; Jmamm)		-24.9513	31.7218	0.072038	0.40656	0.0238573	0.471411	8.96218e-05	0.00989425	0	0.0133716	0.00277828	239.482
KF0177	Faeces	Loxodonta africana	-26.885	3.74644	45.0123	1.13565	39.6356	2.78493	June	2002	Dry	Kruger Park	South	Basalt	S128	J Codron et al (2006; Jmamm)		-25.0741	31.9041	0.028573	0.22412	0.691057	0.0479323	3.58506e-05	0.00179253	0	0.000233029	0.00625594	338.484
KF0178	Faeces	Loxodonta africana	-26.285	3.04357	48.8572	1.09864	44.4707	6.81185	June	2002	Dry	Kruger Park	South	Basalt	S128	J Codron et al (2006; Jmamm)		-25.0741	31.9041	0.028573	0.22412	0.691057	0.0479323	3.58506e-05	0.00179253	0	0.000233029	0.00625594	338.484
KF0179	Faeces	Loxodonta africana	-25.9289	1.77272	48.6325	1.21505	40.025	9.20212	June	2002	Dry	Kruger Park	South	Basalt	S128	J Codron et al (2006; Jmamm)		-25.0741	31.9041	0.028573	0.22412	0.691057	0.0479323	3.58506e-05	0.00179253	0	0.000233029	0.00625594	338.484
KF0180	Faeces	Loxodonta africana	-26.391	2.31849	46.7805	1.03087	45.3798	6.10072	June	2002	Dry	Kruger Park	South	Basalt	S128	J Codron et al (2006; Jmamm)		-25.0741	31.9041	0.028573	0.22412	0.691057	0.0479323	3.58506e-05	0.00179253	0	0.000233029	0.00625594	338.484
KF0181	Faeces	Loxodonta africana	-25.8641	1.90572	46.7996	0.786786	59.4821	9.63708	June	2002	Dry	Kruger Park	South	Basalt	S128	J Codron et al (2006; Jmamm)		-25.0667	31.898	0.0351739	0.257888	0.654177	0.0443887	3.58551e-05	0.00121907	0	0.000770886	0.00634636	330.082
KF0182	Faeces	Loxodonta africana	-25.9202	3.57639	42.8199	1.18007	36.2858	9.26015	June	2002	Dry	Kruger Park	South	Basalt	S128	J Codron et al (2006; Jmamm)		-25.0938	31.9128	0.0471139	0.24048	0.634594	0.0648734	0.000465941	0.00218634	0	0.000268812	0.0100177	326.107
KF0183	Faeces	Loxodonta africana	-25.4823	2.20563	36.712	0.909451	40.3672	12.1994	June	2002	Dry	Kruger Park	South	Basalt	S128	J Codron et al (2006; Jmamm)		-25.0938	31.9128	0.0471139	0.24048	0.634594	0.0648734	0.000465941	0.00218634	0	0.000268812	0.0100177	326.107
KF0184	Faeces	Loxodonta africana	-26.9617	6.15901	44.9887	1.7959	25.0508	2.27034	June	2002	Dry	Kruger Park	South	Basalt	Crocodile River	J Codron et al (2006; Jmamm)	251m	-25.3418	31.9405	0.112681	0.0695156	0.526315	0.0388269	0.241763	0.00367476	0.000609472	0.00360305	0.00301151	247.345
KF0185	Faeces	Loxodonta africana	-25.2908	4.42704	42.6328	1.15006	37.07	13.4848	June	2002	Dry	Kruger Park	South	Basalt	Crocodile River	J Codron et al (2006; Jmamm)	251m	-25.3418	31.9405	0.112681	0.0695156	0.526315	0.0388269	0.241763	0.00367476	0.000609472	0.00360305	0.00301151	247.345
KF0186	Faeces	Loxodonta africana	-25.8244	3.02886	45.0199	1.13401	39.6995	9.90311	June	2002	Dry	Kruger Park	South	Basalt	Crocodile River	J Codron et al (2006; Jmamm)	251m	-25.3418	31.9405	0.112681	0.0695156	0.526315	0.0388269	0.241763	0.00367476	0.000609472	0.00360305	0.00301151	247.345
KF0187	Faeces	Loxodonta africana	-26.0542	4.14954	47.3017	0.995978	47.4927	8.36087	June	2002	Dry	Kruger Park	South	Granite	Renosterkoppies	J Codron et al (2006; Jmamm)	282m	-25.072	31.6105	0.0674407	0.660467	0.0100158	0.254856	3.58346e-05	0.00172006	0	0.00542894	3.58346e-05	219.301
KF0188	Faeces	Loxodonta africana	-26.503	4.83886	43.5159	1.12392	38.718	5.34907	June	2002	Dry	Kruger Park	South	Granite	Renosterkoppies	J Codron et al (2006; Jmamm)	282m	-25.072	31.6105	0.0674407	0.660467	0.0100158	0.254856	3.58346e-05	0.00172006	0	0.00542894	3.58346e-05	219.301
KF0189	Faeces	Loxodonta africana	-25.8603	4.49335	45.6766	1.06332	42.9568	9.66218	June	2002	Dry	Kruger Park	South	Granite	Renosterkoppies	J Codron et al (2006; Jmamm)	282m	-25.072	31.6105	0.0674407	0.660467	0.0100158	0.254856	3.58346e-05	0.00172006	0	0.00542894	3.58346e-05	219.301
KF0190	Faeces	Loxodonta africana	-25.9575	4.83792	43.0953	1.37419	31.3605	9.01005	June	2002	Dry	Kruger Park	South	Granite	Renosterkoppies	J Codron et al (2006; Jmamm)	282m	-25.072	31.6105	0.0674407	0.660467	0.0100158	0.254856	3.58346e-05	0.00172006	0	0.00542894	3.58346e-05	219.301
KF0191	Faeces	Loxodonta africana	-26.4272	6.65535	46.6388	1.26548	36.8545	5.8578	June	2002	Dry	Kruger Park	South	Granite	Renosterkoppies	J Codron et al (2006; Jmamm)	282m	-25.072	31.6105	0.0674407	0.660467	0.0100158	0.254856	3.58346e-05	0.00172006	0	0.00542894	3.58346e-05	219.301
KF0192	Faeces	Loxodonta africana	-25.8634	6.60817	42.9703	1.43674	29.9081	9.64177	June	2002	Dry	Kruger Park	South	Granite	N'watimvambu R	J Codron et al (2006; Jmamm)	214m	-25.0173	31.7822	0.0265649	0.408027	0.0648885	0.473794	0	0.0081021	0	0.0142862	0.00433785	252.355
KF0193	Faeces	Loxodonta africana	-26.5515	4.84139	44.8134	1.09006	41.1108	5.02369	June	2002	Dry	Kruger Park	South	Granite	N'watimvambu R	J Codron et al (2006; Jmamm)	214m	-25.0173	31.7822	0.0265649	0.408027	0.0648885	0.473794	0	0.0081021	0	0.0142862	0.00433785	252.355
KF0194	Faeces	Loxodonta africana	-26.5928	5.75972	44.7824	1.38563	32.3191	4.74645	June	2002	Dry	Kruger Park	South	Granite	N'watimvambu R	J Codron et al (2006; Jmamm)	214m	-25.0173	31.7822	0.0265649	0.408027	0.0648885	0.473794	0	0.0081021	0	0.0142862	0.00433785	252.355
KF0195	Faeces	Loxodonta africana	-26.2771	5.85749	40.7419	1.41849	28.7221	6.86507	June	2002	Dry	Kruger Park	South	Granite	N'watimvambu R	J Codron et al (2006; Jmamm)	214m	-25.0173	31.7822	0.0265649	0.408027	0.0648885	0.473794	0	0.0081021	0	0.0142862	0.00433785	252.355
KF0196	Faeces	Loxodonta africana	-25.5388	5.81951	42.8321	1.21704	35.1937	11.8201	June	2002	Dry	Kruger Park	South	Granite	N'watimvambu R	J Codron et al (2006; Jmamm)	214m	-25.0173	31.7822	0.0265649	0.408027	0.0648885	0.473794	0	0.0081021	0	0.0142862	0.00433785	252.355
KF0312	Faeces	Loxodonta africana	-21.7036	3.60122	41.2943	1.25587	32.881	41.4028	January	2003	Wet	Kruger Park	South	Basalt	Crocodile River	J Codron et al (2006; Jmamm)	251m	-25.3418	31.9405	0.112681	0.0695156	0.526315	0.0388269	0.241763	0.00367476	0.000609472	0.00360305	0.00301151	247.345
KF0329	Faeces	Loxodonta africana	-25.8505	7.70627	57.1322	1.66892	34.233	11.7823	January	2003	Wet	Kruger Park	South	Granite	Renosterkoppies	J Codron et al (2006; Jmamm)	282m	-25.072	31.6105	0.0674407	0.660467	0.0100158	0.254856	3.58346e-05	0.00172006	0	0.00542894	3.58346e-05	219.301
KF0342	Faeces	Loxodonta africana	-19.7732	4.65214	42.4453	1.37928	30.7735	55.1915	January	2003	Wet	Kruger Park	South	Granite	N'watimvambu R	J Codron et al (2006; Jmamm)	214m	-25.0173	31.7822	0.0265649	0.408027	0.0648885	0.473794	0	0.0081021	0	0.0142862	0.00433785	252.355
KF0343	Faeces	Loxodonta africana	-21.5336	6.9714	50.8037	2.5964	19.567	42.6172	January	2003	Wet	Kruger Park	South	Granite	N'watimvambu R	J Codron et al (2006; Jmamm)	214m	-25.0173	31.7822	0.0265649	0.408027	0.0648885	0.473794	0	0.0081021	0	0.0142862	0.00433785	252.355
KF0344	Faeces	Loxodonta africana	-22.4427	7.91129	66.9422	2.54662	26.2867	36.1234	January	2003	Wet	Kruger Park	South	Granite	N'watimvambu R	J Codron et al (2006; Jmamm)	214m	-25.0173	31.7822	0.0265649	0.408027	0.0648885	0.473794	0	0.0081021	0	0.0142862	0.00433785	252.355
KF0345	Faeces	Loxodonta africana	-21.7314	8.28127	43.0655	1.83323	23.4916	41.2041	January	2003	Wet	Kruger Park	South	Granite	N'watimvambu R	J Codron et al (2006; Jmamm)	214m	-25.0173	31.7822	0.0265649	0.408027	0.0648885	0.473794	0	0.0081021	0	0.0142862	0.00433785	252.355
KF0346	Faeces	Loxodonta africana	-21.4516	6.33523	63.0483	1.53696	41.0213	43.2027	January	2003	Wet	Kruger Park	South	Granite	N'watimvambu R	J Codron et al (2006; Jmamm)	214m	-25.0173	31.7822	0.0265649	0.408027	0.0648885	0.473794	0	0.0081021	0	0.0142862	0.00433785	252.355
KF0347	Faeces	Loxodonta africana	-20.2211	5.78825	43.2461	1.33909	32.2951	51.9923	January	2003	Wet	Kruger Park	South	Granite	N'watimvambu R	J Codron et al (2006; Jmamm)	214m	-25.0173	31.7822	0.0265649	0.408027	0.0648885	0.473794	0	0.0081021	0	0.0142862	0.00433785	252.355
KF0348	Faeces	Loxodonta africana	-22.0412	7.4471	63.3535	1.96428	32.2527	38.9916	January	2003	Wet	Kruger Park	South	Granite	N'watimvambu R	J Codron et al (2006; Jmamm)	214m	-25.0173	31.7822	0.0265649	0.408027	0.0648885	0.473794	0	0.0081021	0	0.0142862	0.00433785	252.355
KF0349	Faeces	Loxodonta africana	-20.8246	5.61919	43.0703	1.1275	38.1998	47.6815	January	2003	Wet	Kruger Park	South	Granite	N'watimvambu R	J Codron et al (2006; Jmamm)	214m	-25.0173	31.7822	0.0265649	0.408027	0.0648885	0.473794	0	0.0081021	0	0.0142862	0.00433785	252.355
KF0350	Faeces	Loxodonta africana	-23.9225	6.77358	66.978	1.92731	34.752	25.5537	January	2003	Wet	Kruger Park	South	Granite	N'watimvambu R	J Codron et al (2006; Jmamm)	214m	-25.0173	31.7822	0.0265649	0.408027	0.0648885	0.473794	0	0.0081021	0	0.0142862	0.00433785	252.355
KF0351	Faeces	Loxodonta africana	-22.598	7.64941	61.2259	1.81996	33.6414	35.014	January	2003	Wet	Kruger Park	South	Granite	N'watimvambu R	J Codron et al (2006; Jmamm)	214m	-25.0173	31.7822	0.0265649	0.408027	0.0648885	0.473794	0	0.0081021	0	0.0142862	0.00433785	252.355
KF0558	Faeces	Loxodonta africana	-25.7399	3.14256	44.6342	1.50204	29.7158	10.4704	June	2003	Dry	Kruger Park	South	Granite	Salitje Road	J Codron et al (2006; Jmamm)		-25.0741	31.9041	0.028573	0.22412	0.691057	0.0479323	3.58506e-05	0.00179253	0	0.000233029	0.00625594	338.484
KF0559	Faeces	Loxodonta africana	-22.3034	2.67029	43.4135	1.08594	39.9778	33.534	June	2003	Dry	Kruger Park	South	Granite	Salitje Road	J Codron et al (2006; Jmamm)		-25.0543	31.888	0.0258658	0.32654	0.595576	0.0467484	1.7925e-05	0.00082455	0	0.00139815	0.00302933	320.149
KF0560	Faeces	Loxodonta africana	-25.4595	3.08838	46.7948	1.28634	36.3784	12.3524	June	2003	Dry	Kruger Park	South	Granite	Salitje Road	J Codron et al (2006; Jmamm)		-25.0159	31.8682	0.0170631	0.427455	0.48938	0.0658685	0	0.000215081	0	1.79234e-05	0	302.71
KF0646	Faeces	Loxodonta africana	-27.3838	2.48051	46.9055	0.782316	59.9572	0.231571	June	2003	Dry	Kruger Park	South	Granite	Renosterkoppies	J Codron et al (2006; Jmamm)	282m	-25.072	31.6105	0.0674407	0.660467	0.0100158	0.254856	3.58346e-05	0.00172006	0	0.00542894	3.58346e-05	219.301
KF0647	Faeces	Loxodonta africana	-27.0675	4.44527	46.2763	1.35448	34.1654	1.56067	June	2003	Dry	Kruger Park	South	Granite	Renosterkoppies	J Codron et al (2006; Jmamm)	282m	-25.072	31.6105	0.0674407	0.660467	0.0100158	0.254856	3.58346e-05	0.00172006	0	0.00542894	3.58346e-05	219.301
KF0648	Faeces	Loxodonta africana	-27.0801	3.41389	47.1271	1.24282	37.9195	1.47578	June	2003	Dry	Kruger Park	South	Granite	Renosterkoppies	J Codron et al (2006; Jmamm)	282m	-25.072	31.6105	0.0674407	0.660467	0.0100158	0.254856	3.58346e-05	0.00172006	0	0.00542894	3.58346e-05	219.301
KF0649	Faeces	Loxodonta africana	-25.6652	3.65881	41.5747	1.25819	33.0433	10.9715	June	2003	Dry	Kruger Park	South	Granite	Renosterkoppies	J Codron et al (2006; Jmamm)	282m	-25.072	31.6105	0.0674407	0.660467	0.0100158	0.254856	3.58346e-05	0.00172006	0	0.00542894	3.58346e-05	219.301
KF0650	Faeces	Loxodonta africana	-26.5311	4.64504	46.4713	1.33844	34.7204	5.16018	June	2003	Dry	Kruger Park	South	Granite	Renosterkoppies	J Codron et al (2006; Jmamm)	282m	-25.072	31.6105	0.0674407	0.660467	0.0100158	0.254856	3.58346e-05	0.00172006	0	0.00542894	3.58346e-05	219.301
KF0662	Faeces	Loxodonta africana	-25.5269	3.53116	40.3468	1.15492	34.9347	11.9003	June	2003	Dry	Kruger Park	South	Granite	N'watimvambu R	J Codron et al (2006; Jmamm)	214m	-25.0173	31.7822	0.0265649	0.408027	0.0648885	0.473794	0	0.0081021	0	0.0142862	0.00433785	252.355
KF0663	Faeces	Loxodonta africana	-19.0156	3.28587	39.6812	1.15994	34.2096	55.6003	June	2003	Dry	Kruger Park	South	Granite	N'watimvambu R	J Codron et al (2006; Jmamm)	214m	-25.0173	31.7822	0.0265649	0.408027	0.0648885	0.473794	0	0.0081021	0	0.0142862	0.00433785	252.355
KF0664	Faeces	Loxodonta africana	-27.7339	3.56404	43.8923	1.32083	33.2308	0.231571	June	2003	Dry	Kruger Park	South	Granite	N'watimvambu R	J Codron et al (2006; Jmamm)	214m	-25.0173	31.7822	0.0265649	0.408027	0.0648885	0.473794	0	0.0081021	0	0.0142862	0.00433785	252.355
KF0713	Faeces	Loxodonta africana	-25.3893	4.23063	36.7802	1.58472	23.2094	12.8236	June	2003	Dry	Kruger Park	South	Basalt	Kruger Memorial Tablets	J Codron et al (2006; Jmamm)		-24.8298	31.8331	0.039131	0.117285	0.606127	0.225769	0	0.000161328	0	0.0112392	0.000286805	337.552
KF0714	Faeces	Loxodonta africana	-27.1271	3.49875	34.7859	1.22318	28.439	1.16008	June	2003	Dry	Kruger Park	South	Basalt	Kruger Memorial Tablets	J Codron et al (2006; Jmamm)		-24.8298	31.8331	0.039131	0.117285	0.606127	0.225769	0	0.000161328	0	0.0112392	0.000286805	337.552
KF0715	Faeces	Loxodonta africana	-24.4222	5.16013	32.6621	1.28302	25.4572	19.3139	June	2003	Dry	Kruger Park	South	Basalt	Leeupan	J Codron et al (2006; Jmamm)		-24.8447	31.8078	0.0453869	0.112033	0.584258	0.247011	0	7.17013e-05	0	0.0109524	0.000286805	334.752
KF0954	Faeces	Loxodonta africana	-18.8534	4.85046	36.47	2.0859	17.484	61.7611	February	2004	Wet	Kruger Park	South	Basalt	Crocodile River	J Codron et al (2006; Jmamm)	251m	-25.3418	31.9405	0.112681	0.0695156	0.526315	0.0388269	0.241763	0.00367476	0.000609472	0.00360305	0.00301151	247.345
KF1080	Faeces	Loxodonta africana	-25.1552	5.76213	43.5862	1.74076	25.0387	25.2549	June	2004	Dry	Kruger Park	South	Basalt	Hlanganzwane	J Codron et al (2011; Oecologia)	238m	-25.2367	31.9857	0.0254755	0.144445	0.761953	0.066871	0	0	0	0	0.00125495	356.279
KF1091	Faeces	Loxodonta africana	-24.744	5.8815	44.3286	1.89853	23.349	28.0316	June	2004	Dry	Kruger Park	South	Basalt	Crocodile River	J Codron et al (2011; Oecologia)	251m	-25.3418	31.9405	0.112681	0.0695156	0.526315	0.0388269	0.241763	0.00367476	0.000609472	0.00360305	0.00301151	247.345
KF1115	Faeces	Loxodonta africana	-26.578	6.17944	46.157	1.38426	33.3441	11.9213	June	2004	Dry	Kruger Park	South	Granite	N'watimvambu R	J Codron et al (2011; Oecologia)	214m	-25.0173	31.7822	0.0265649	0.408027	0.0648885	0.473794	0	0.0081021	0	0.0142862	0.00433785	252.355

## Sheet: 8km_buffer
Sample_ID	Material	Species	d13C	d15N	%C	%N	C/N	%C4	Month	Year	Season	Reserve	Part	Geology	Site_Name	FirstPublication	Elevation	latitude	longitude	CDW%	ODW%	CG%	DG%	AG%	BU%	CCW%	BA%	WA%	grassiness index
JF0011	Faeces	Loxodonta africana	-20.791	3.44475	42.7931	2.67528	15.9957	47.9212	February	2004	Wet	Kruger Park	South	Basalt	S28	J Codron et al (2011; Oecologia)	238m	-25.2367	31.9857	0.0690173	0.144084	0.705851	0.0779923	0.000156827	0.00112915	0	0.00029125	0.00147865	341.457
JF0012	Faeces	Loxodonta africana	-19.3327	3.0284	44.8998	2.15894	20.7971	58.3376	February	2004	Wet	Kruger Park	South	Basalt	Crocodile River	J Codron et al (2011; Oecologia)	179m	-25.3268	31.9232	0.0762676	0.146644	0.605831	0.0502193	0.0940542	0.00280017	0.000255375	0.00250447	0.0214246	294.354
JF0013	Faeces	Loxodonta africana	-18.5495	3.05066	44.8711	2.18778	20.5099	63.932	February	2004	Wet	Kruger Park	South	Basalt	Crocodile River	J Codron et al (2011; Oecologia)	179m	-25.3268	31.9232	0.0762676	0.146644	0.605831	0.0502193	0.0940542	0.00280017	0.000255375	0.00250447	0.0214246	294.354
JF0014	Faeces	Loxodonta africana	-21.1821	5.51135	44.6849	2.21843	20.1426	45.1275	February	2004	Wet	Kruger Park	South	Basalt	Crocodile River	J Codron et al (2011; Oecologia)	179m	-25.3268	31.9232	0.0762676	0.146644	0.605831	0.0502193	0.0940542	0.00280017	0.000255375	0.00250447	0.0214246	294.354
JF0015	Faeces	Loxodonta africana	-18.8046	0.320819	43.367	1.73561	24.9866	62.1101	February	2004	Wet	Kruger Park	South	Basalt	Crocodile River	J Codron et al (2011; Oecologia)	179m	-25.3268	31.9232	0.0762676	0.146644	0.605831	0.0502193	0.0940542	0.00280017	0.000255375	0.00250447	0.0214246	294.354
JF0016	Faeces	Loxodonta africana	-20.2618	5.14155	47.2449	2.20459	21.4303	51.5731	February	2004	Wet	Kruger Park	South	Basalt	Crocodile River	J Codron et al (2011; Oecologia)	179m	-25.3268	31.9232	0.0762676	0.146644	0.605831	0.0502193	0.0940542	0.00280017	0.000255375	0.00250447	0.0214246	294.354
JF0017	Faeces	Loxodonta africana	-16.8176	5.3462	43.8243	2.32313	18.8643	75.7436	February	2004	Wet	Kruger Park	South	Basalt	Crocodile River	J Codron et al (2011; Oecologia)	179m	-25.3268	31.9232	0.0762676	0.146644	0.605831	0.0502193	0.0940542	0.00280017	0.000255375	0.00250447	0.0214246	294.354
JF0018	Faeces	Loxodonta africana	-18.8414	3.54675	40.9742	2.55918	16.0106	61.5409	February	2004	Wet	Kruger Park	South	Basalt	Crocodile River	J Codron et al (2011; Oecologia)	179m	-25.3268	31.9232	0.0762676	0.146644	0.605831	0.0502193	0.0940542	0.00280017	0.000255375	0.00250447	0.0214246	294.354
JF0019	Faeces	Loxodonta africana	-18.1846	4.52627	41.298	2.20222	18.7529	66.1503	February	2004	Wet	Kruger Park	South	Basalt	Crocodile River	J Codron et al (2011; Oecologia)	179m	-25.3268	31.9232	0.0762676	0.146644	0.605831	0.0502193	0.0940542	0.00280017	0.000255375	0.00250447	0.0214246	294.354
JF0020	Faeces	Loxodonta africana	-19.4146	4.87508	36.836	2.14282	17.1904	57.5185	February	2004	Wet	Kruger Park	South	Basalt	Crocodile River	J Codron et al (2011; Oecologia)	179m	-25.3268	31.9232	0.0762676	0.146644	0.605831	0.0502193	0.0940542	0.00280017	0.000255375	0.00250447	0.0214246	294.354
JF0021	Faeces	Loxodonta africana	-18.6253	4.95868	42.4148	1.5129	28.0354	63.3908	February	2004	Wet	Kruger Park	South	Granite	H1-1	J Codron et al (2011; Oecologia)	308m	-25.0458	31.589	0.0666135	0.618564	0.0400953	0.259323	2.23971e-05	0.00702822	0	0.00730146	0.00105266	224.209
JF0022	Faeces	Loxodonta africana	-18.0283	5.68939	34.9551	1.28276	27.2499	67.6551	February	2004	Wet	Kruger Park	South	Granite	Renosterkoppies	J Codron et al (2011; Oecologia)	282m	-25.072	31.6105	0.0525069	0.692618	0.031978	0.218435	8.95869e-06	0.0020381	0	0.00240541	8.95869e-06	222.096
JF0023	Faeces	Loxodonta africana	-17.3437	5.02099	44.4724	1.28188	34.6931	72.5453	February	2004	Wet	Kruger Park	South	Granite	Renosterkoppies	J Codron et al (2011; Oecologia)	282m	-25.072	31.6105	0.0525069	0.692618	0.031978	0.218435	8.95869e-06	0.0020381	0	0.00240541	8.95869e-06	222.096
JF0024	Faeces	Loxodonta africana	-19.0607	5.72945	39.4064	1.82809	21.556	60.2807	February	2004	Wet	Kruger Park	South	Granite	Renosterkoppies	J Codron et al (2011; Oecologia)	282m	-25.072	31.6105	0.0525069	0.692618	0.031978	0.218435	8.95869e-06	0.0020381	0	0.00240541	8.95869e-06	222.096
JF0025	Faeces	Loxodonta africana	-23.8803	3.96695	45.1485	2.77887	16.2471	25.8553	February	2004	Wet	Kruger Park	South	Granite	Maroela Loop	J Codron et al (2011; Oecologia)	255m	-24.9397	31.6699	0.0613997	0.446906	0.0628869	0.408891	2.23988e-05	0.00539364	0	0.0125881	0.00191286	243.343
JF0026	Faeces	Loxodonta africana	-21.8332	5.39426	44.4336	2.20064	20.1912	40.9689	February	2004	Wet	Kruger Park	South	Granite	Maroela Loop	J Codron et al (2011; Oecologia)	255m	-24.9397	31.6699	0.0613997	0.446906	0.0628869	0.408891	2.23988e-05	0.00539364	0	0.0125881	0.00191286	243.343
JF0027	Faeces	Loxodonta africana	-22.2904	6.17927	50.6401	2.172	23.3149	37.7371	February	2004	Wet	Kruger Park	South	Granite	Maroela Loop	J Codron et al (2011; Oecologia)	255m	-24.9397	31.6699	0.0613997	0.446906	0.0628869	0.408891	2.23988e-05	0.00539364	0	0.0125881	0.00191286	243.343
JF0028	Faeces	Loxodonta africana	-20.2876	4.58108	32.6685	1.88058	17.3715	51.8926	February	2004	Wet	Kruger Park	South Central	Granite	S36	J Codron et al (2011; Oecologia)	272m	-24.8727	31.7563	0.0254833	0.168347	0.44939	0.34945	0	0.000380816	0	0.00694429	4.48019e-06	320.809
JF0029	Faeces	Loxodonta africana	-21.0626	3.99131	44.4594	2.35926	18.8446	46.4152	February	2004	Wet	Kruger Park	South Central	Granite	S36	J Codron et al (2011; Oecologia)	374m	-24.8019	31.6897	0.0141345	0.155847	0.349103	0.467099	0	0.000622726	0	0.0131937	0	312.354
JF0030	Faeces	Loxodonta africana	-20.4754	4.02625	41.1808	2.0085	20.5033	50.5648	February	2004	Wet	Kruger Park	South Central	Granite	S36	J Codron et al (2011; Oecologia)	374m	-24.8019	31.6897	0.0141345	0.155847	0.349103	0.467099	0	0.000622726	0	0.0131937	0	312.354
JF0031	Faeces	Loxodonta africana	-19.8368	5.05254	26.7305	1.79721	14.8733	55.0784	February	2004	Wet	Kruger Park	South Central	Granite	S36	J Codron et al (2011; Oecologia)	374m	-24.8019	31.6897	0.0141345	0.155847	0.349103	0.467099	0	0.000622726	0	0.0131937	0	312.354
JF0032	Faeces	Loxodonta africana	-20.639	3.95496	44.0085	2.69961	16.3018	49.4087	February	2004	Wet	Kruger Park	South Central	Granite	S36	J Codron et al (2011; Oecologia)	374m	-24.8019	31.6897	0.0141345	0.155847	0.349103	0.467099	0	0.000622726	0	0.0131937	0	312.354
JF0033	Faeces	Loxodonta africana	-20.5632	3.62633	44.2708	2.3736	18.6514	49.9442	February	2004	Wet	Kruger Park	South Central	Granite	S36	J Codron et al (2011; Oecologia)	374m	-24.8019	31.6897	0.0141345	0.155847	0.349103	0.467099	0	0.000622726	0	0.0131937	0	312.354
JF0034	Faeces	Loxodonta africana	-21.7672	5.53699	47.5969	2.42532	19.625	41.0091	February	2004	Wet	Kruger Park	South Central	Basalt	Tshokwane	J Codron et al (2011; Oecologia)	258m	-24.811	31.8859	0.0565713	0.0694384	0.679797	0.189525	4.48019e-06	0.000869156	0	0.00184136	0.00195336	348.321
JF0035	Faeces	Loxodonta africana	-22.1135	5.98215	46.7517	2.75771	16.953	38.5784	February	2004	Wet	Kruger Park	South Central	Basalt	Tshokwane	J Codron et al (2011; Oecologia)	258m	-24.811	31.8859	0.0565713	0.0694384	0.679797	0.189525	4.48019e-06	0.000869156	0	0.00184136	0.00195336	348.321
JF0036	Faeces	Loxodonta africana	-22.554	7.18339	47.3113	2.20453	21.4609	35.4876	February	2004	Wet	Kruger Park	South Central	Basalt	Tshokwane	J Codron et al (2011; Oecologia)	258m	-24.811	31.8859	0.0565713	0.0694384	0.679797	0.189525	4.48019e-06	0.000869156	0	0.00184136	0.00195336	348.321
JF0037	Faeces	Loxodonta africana	-22.6049	6.55862	45.913	2.76191	16.6236	35.1304	February	2004	Wet	Kruger Park	South Central	Basalt	Tshokwane	J Codron et al (2011; Oecologia)	258m	-24.811	31.8859	0.0565713	0.0694384	0.679797	0.189525	4.48019e-06	0.000869156	0	0.00184136	0.00195336	348.321
JF0038	Faeces	Loxodonta africana	-21.8362	6.57883	45.954	2.46514	18.6416	40.5246	February	2004	Wet	Kruger Park	South Central	Basalt	Tshokwane	J Codron et al (2011; Oecologia)	258m	-24.811	31.8859	0.0565713	0.0694384	0.679797	0.189525	4.48019e-06	0.000869156	0	0.00184136	0.00195336	348.321
JF0039	Faeces	Loxodonta africana	-22.7696	5.31847	45.8096	3.02533	15.142	33.9746	February	2004	Wet	Kruger Park	South Central	Basalt	Tshokwane	J Codron et al (2011; Oecologia)	258m	-24.811	31.8859	0.0565713	0.0694384	0.679797	0.189525	4.48019e-06	0.000869156	0	0.00184136	0.00195336	348.321
JF0040	Faeces	Loxodonta africana	-20.5851	3.74057	43.1829	2.35508	18.336	49.3041	February	2004	Wet	Kruger Park	South Central	Basalt	Rietpan	J Codron et al (2011; Oecologia)	300m	-24.9027	31.915	0.0424069	0.0296915	0.842989	0.0837877	8.51274e-05	0.000161294	0	4.48039e-06	0.000873675	372.511
JF0041	Faeces	Loxodonta africana	-20.8857	1.30513	44.5187	2.26313	19.6714	47.1949	February	2004	Wet	Kruger Park	South Central	Basalt	Rietpan	J Codron et al (2011; Oecologia)	300m	-24.9027	31.915	0.0424069	0.0296915	0.842989	0.0837877	8.51274e-05	0.000161294	0	4.48039e-06	0.000873675	372.511
JF0042	Faeces	Loxodonta africana	-20.0309	4.85191	43.5762	3.06354	14.2241	53.1936	February	2004	Wet	Kruger Park	South Central	Basalt	Mlondozi	J Codron et al (2011; Oecologia)	278m	-24.9301	31.9148	0.0321974	0.0505318	0.819491	0.0961395	0.000546629	0.000170262	4.48057e-06	4.48057e-06	0.000914036	369.965
JF0043	Faeces	Loxodonta africana	-20.2976	3.70496	44.6716	3.48524	12.8173	51.3219	February	2004	Wet	Kruger Park	South Central	Basalt	Mlondozi	J Codron et al (2011; Oecologia)	278m	-24.9301	31.9148	0.0321974	0.0505318	0.819491	0.0961395	0.000546629	0.000170262	4.48057e-06	4.48057e-06	0.000914036	369.965
JF0044	Faeces	Loxodonta africana	-19.1874	4.48942	22.361	1.04465	21.4053	59.1126	February	2004	Wet	Kruger Park	South Central	Basalt	H1-10	J Codron et al (2011; Oecologia)	340m	-24.7649	31.7282	0.0281877	0.112428	0.26906	0.559619	0	0.00060031	0	0.0300693	3.58394e-05	300.814
JF0051	Faeces	Loxodonta africana	-20.7846	5.80353	42.602	2.37378	17.9469	47.9103	February	2004	Wet	Kruger Park	North Central	Granite	Shikumbu	J Codron et al (2011; Oecologia)	394m	-23.9195	31.2315	0.00737974	0.13713	0.108981	0.712548	4.478e-06	0.0218213	0	0.0116383	0.000497058	285.521
JF0055	Faeces	Loxodonta africana	-15.9735	4.15674	39.0688	1.59141	24.5499	79.7468	February	2004	Wet	Kruger Park	North Central	Basalt	Letaba	J Codron et al (2011; Oecologia)	266m	-23.8626	31.5591	0.0456433	0.185512	0.315879	0.432079	7.61468e-05	0.00700103	0	0.0095497	0.00425974	297.642
JF0056	Faeces	Loxodonta africana	-18.6288	0.784479	43.2901	1.84969	23.4039	60.2326	February	2004	Wet	Kruger Park	North Central	Basalt	Letaba	J Codron et al (2011; Oecologia)	259m	-23.8453	31.5717	0.0634269	0.154572	0.364293	0.390824	0.000143338	0.00873912	0	0.0114805	0.00652187	300.221
JF0057	Faeces	Loxodonta africana	-19.0863	5.36966	43.5984	2.40424	18.1339	56.8703	February	2004	Wet	Kruger Park	North Central	Basalt	Letaba	J Codron et al (2011; Oecologia)	259m	-23.8453	31.5717	0.0634269	0.154572	0.364293	0.390824	0.000143338	0.00873912	0	0.0114805	0.00652187	300.221
JF0058	Faeces	Loxodonta africana	-18.9795	3.19903	43.7359	1.44252	30.3192	57.6552	February	2004	Wet	Kruger Park	North Central	Basalt	Letaba	J Codron et al (2011; Oecologia)	271m	-23.7996	31.5807	0.0707003	0.113766	0.529542	0.258701	0.000147824	0.00774062	0	0.0138059	0.00559493	319.251
JF0059	Faeces	Loxodonta africana	-19.3528	1.52002	40.4067	2.16328	18.6784	54.9113	February	2004	Wet	Kruger Park	North Central	Basalt	Letaba	J Codron et al (2011; Oecologia)	271m	-23.7996	31.5807	0.0707003	0.113766	0.529542	0.258701	0.000147824	0.00774062	0	0.0138059	0.00559493	319.251
JF0060	Faeces	Loxodonta africana	-20.4263	5.7417	41.6914	2.04431	20.3938	47.0222	February	2004	Wet	Kruger Park	North Central	Basalt	Letaba	J Codron et al (2011; Oecologia)	271m	-23.7996	31.5807	0.0707003	0.113766	0.529542	0.258701	0.000147824	0.00774062	0	0.0138059	0.00559493	319.251
JF0061	Faeces	Loxodonta africana	-17.5965	7.09285	46.4706	1.8106	25.6659	67.8185	February	2004	Wet	Kruger Park	North Central	Basalt	Letaba	J Codron et al (2011; Oecologia)	271m	-23.7996	31.5807	0.0707003	0.113766	0.529542	0.258701	0.000147824	0.00774062	0	0.0138059	0.00559493	319.251
JF0062	Faeces	Loxodonta africana	-18.5291	5.71231	42.9869	2.00382	21.4525	60.9651	February	2004	Wet	Kruger Park	North Central	Basalt	Letaba	J Codron et al (2011; Oecologia)	271m	-23.7996	31.5807	0.0707003	0.113766	0.529542	0.258701	0.000147824	0.00774062	0	0.0138059	0.00559493	319.251
JF0063	Faeces	Loxodonta africana	-19.2092	4.31824	34.1068	2.27065	15.0207	55.967	February	2004	Wet	Kruger Park	North Central	Basalt	Letaba	J Codron et al (2011; Oecologia)	271m	-23.7996	31.5807	0.0707003	0.113766	0.529542	0.258701	0.000147824	0.00774062	0	0.0138059	0.00559493	319.251
JF0064	Faeces	Loxodonta africana	-22.6518	6.53434	45.7826	2.06263	22.1962	30.6662	February	2004	Wet	Kruger Park	North Central	Basalt	Letaba	J Codron et al (2011; Oecologia)	271m	-23.7996	31.5807	0.0707003	0.113766	0.529542	0.258701	0.000147824	0.00774062	0	0.0138059	0.00559493	319.251
JF0065	Faeces	Loxodonta africana	-19.52	6.41421	46.5727	1.67879	27.7419	53.6828	February	2004	Wet	Kruger Park	North Central	Basalt	Letaba	J Codron et al (2011; Oecologia)	271m	-23.7996	31.5807	0.0707003	0.113766	0.529542	0.258701	0.000147824	0.00774062	0	0.0138059	0.00559493	319.251
JF0101	Faeces	Loxodonta africana	-21.4123	3.05734	45.9054	2.14466	21.4045	43.9434	March	2004	Wet	Kruger Park	South	Granite	S3	J Codron et al (2011; Oecologia)		-25.1521	31.2024	0.122256	0.438805	0.022359	0.366386	0.00102995	0.0417803	0.000188079	0.00684695	0.000349289	218.846
JF0102	Faeces	Loxodonta africana	-20.2915	2.89791	38.5973	2.17313	17.7612	51.8649	March	2004	Wet	Kruger Park	South	Granite	S3	J Codron et al (2011; Oecologia)		-25.1521	31.2024	0.122256	0.438805	0.022359	0.366386	0.00102995	0.0417803	0.000188079	0.00684695	0.000349289	218.846
JF0103	Faeces	Loxodonta africana	-20.5214	3.57106	43.8559	1.2583	34.8534	50.2398	March	2004	Wet	Kruger Park	South	Granite	S3	J Codron et al (2011; Oecologia)		-25.1521	31.2024	0.122256	0.438805	0.022359	0.366386	0.00102995	0.0417803	0.000188079	0.00684695	0.000349289	218.846
JF0104	Faeces	Loxodonta africana	-20.3952	-0.298422	43.9631	2.22961	19.7178	51.132	March	2004	Wet	Kruger Park	South	Granite	S3	J Codron et al (2011; Oecologia)		-25.1521	31.2024	0.122256	0.438805	0.022359	0.366386	0.00102995	0.0417803	0.000188079	0.00684695	0.000349289	218.846
JF0105	Faeces	Loxodonta africana	-21.9912	1.20732	45.3195	1.98063	22.8814	39.852	March	2004	Wet	Kruger Park	South	Granite	S3	J Codron et al (2011; Oecologia)		-25.1521	31.2024	0.122256	0.438805	0.022359	0.366386	0.00102995	0.0417803	0.000188079	0.00684695	0.000349289	218.846
JF0106	Faeces	Loxodonta africana	-20.5244	4.68239	39.4688	2.29789	17.1761	50.2185	March	2004	Wet	Kruger Park	South	Granite	S3	J Codron et al (2011; Oecologia)		-25.1521	31.2024	0.122256	0.438805	0.022359	0.366386	0.00102995	0.0417803	0.000188079	0.00684695	0.000349289	218.846
JF0107	Faeces	Loxodonta africana	-21.358	4.21929	42.6014	2.38567	17.8572	44.3274	March	2004	Wet	Kruger Park	South	Granite	S3	J Codron et al (2011; Oecologia)		-25.1521	31.2024	0.122256	0.438805	0.022359	0.366386	0.00102995	0.0417803	0.000188079	0.00684695	0.000349289	218.846
JF0108	Faeces	Loxodonta africana	-22.8416	3.87458	35.981	1.47132	24.4549	33.8418	March	2004	Wet	Kruger Park	South	Granite	S3	J Codron et al (2011; Oecologia)		-25.1521	31.2024	0.122256	0.438805	0.022359	0.366386	0.00102995	0.0417803	0.000188079	0.00684695	0.000349289	218.846
JF0109	Faeces	Loxodonta africana	-19.3872	4.34248	46.6797	2.20242	21.1948	58.2558	March	2004	Wet	Kruger Park	South	Granite	S3	J Codron et al (2011; Oecologia)		-25.1064	31.2241	0.095922	0.45879	0.02069	0.39844	0.000698624	0.0191629	0.000116437	0.00545016	0.000729973	229.158
JF0110	Faeces	Loxodonta africana	-19.2313	4.58411	47.2043	2.44942	19.2716	59.3579	March	2004	Wet	Kruger Park	South	Granite	S3	J Codron et al (2011; Oecologia)		-25.1064	31.2241	0.095922	0.45879	0.02069	0.39844	0.000698624	0.0191629	0.000116437	0.00545016	0.000729973	229.158
JF0111	Faeces	Loxodonta africana	-19.2491	2.60369	41.1049	2.95022	13.9328	58.6798	March	2004	Wet	Kruger Park	South Central	Basalt	Tshokwane	J Codron et al (2011; Oecologia)	258m	-24.8018	31.8563	0.0462344	0.0829961	0.582384	0.277765	4.48095e-06	0.00119641	0	0.00772964	0.00168932	337.506
JF0112	Faeces	Loxodonta africana	-19.957	6.33916	44.4591	1.2421	35.7935	53.7125	March	2004	Wet	Kruger Park	South Central	Basalt	Tshokwane	J Codron et al (2011; Oecologia)	258m	-24.8018	31.8563	0.0462344	0.0829961	0.582384	0.277765	4.48095e-06	0.00119641	0	0.00772964	0.00168932	337.506
JF0113	Faeces	Loxodonta africana	-20.259	5.41877	43.7021	1.23528	35.3782	51.5927	March	2004	Wet	Kruger Park	South Central	Basalt	Tshokwane	J Codron et al (2011; Oecologia)	258m	-24.8018	31.8563	0.0462344	0.0829961	0.582384	0.277765	4.48095e-06	0.00119641	0	0.00772964	0.00168932	337.506
JF0114	Faeces	Loxodonta africana	-17.5116	4.01505	41.8828	2.09772	19.9659	70.8729	March	2004	Wet	Kruger Park	South Central	Basalt	Tshokwane	J Codron et al (2011; Oecologia)	258m	-24.8018	31.8563	0.0462344	0.0829961	0.582384	0.277765	4.48095e-06	0.00119641	0	0.00772964	0.00168932	337.506
JF0115	Faeces	Loxodonta africana	-16.8199	4.81571	42.744	2.18491	19.5633	75.7269	March	2004	Wet	Kruger Park	South Central	Basalt	Orpen Dam	J Codron et al (2011; Oecologia)		-24.7918	31.8911	0.046218	0.0771809	0.588083	0.283881	8.96045e-06	0.0010887	0	0.00166664	0.00187273	340.456
JF0116	Faeces	Loxodonta africana	-18.1018	5.57884	34.5849	1.77108	19.5276	66.7315	March	2004	Wet	Kruger Park	South Central	Basalt	Orpen Dam	J Codron et al (2011; Oecologia)		-24.7918	31.8911	0.046218	0.0771809	0.588083	0.283881	8.96045e-06	0.0010887	0	0.00166664	0.00187273	340.456
JF0117	Faeces	Loxodonta africana	-17.491	5.81122	39.365	1.79153	21.9729	71.0178	March	2004	Wet	Kruger Park	South Central	Basalt	Orpen Dam	J Codron et al (2011; Oecologia)		-24.7918	31.8911	0.046218	0.0771809	0.588083	0.283881	8.96045e-06	0.0010887	0	0.00166664	0.00187273	340.456
JF0118	Faeces	Loxodonta africana	-20.2164	6.59518	44.3423	2.21175	20.0485	52.3958	March	2004	Wet	Kruger Park	South Central	Granite	Leeupan	J Codron et al (2011; Oecologia)		-24.8787	31.7667	0.030301	0.175009	0.444707	0.342984	0	0.000394276	0	0.00659964	4.48041e-06	318.81
JF0119	Faeces	Loxodonta africana	-18.0039	0.886146	44.5142	1.57111	28.3329	68.033	March	2004	Wet	Kruger Park	South Central	Granite	Leeupan	J Codron et al (2011; Oecologia)		-24.8787	31.7667	0.030301	0.175009	0.444707	0.342984	0	0.000394276	0	0.00659964	4.48041e-06	318.81
JF0120	Faeces	Loxodonta africana	-20.8508	6.18271	44.2151	1.97776	22.3562	47.9119	March	2004	Wet	Kruger Park	South Central	Granite	Leeupan	J Codron et al (2011; Oecologia)		-24.8787	31.7667	0.030301	0.175009	0.444707	0.342984	0	0.000394276	0	0.00659964	4.48041e-06	318.81
JF0121	Faeces	Loxodonta africana	-18.4421	5.2216	43.64	1.84429	23.6622	64.9357	March	2004	Wet	Kruger Park	South Central	Granite	Leeupan	J Codron et al (2011; Oecologia)		-24.8787	31.7667	0.030301	0.175009	0.444707	0.342984	0	0.000394276	0	0.00659964	4.48041e-06	318.81
JF0122	Faeces	Loxodonta africana	-17.6757	2.41114	42.0148	2.11119	19.901	70.3527	March	2004	Wet	Kruger Park	South Central	Granite	Leeupan	J Codron et al (2011; Oecologia)		-24.8787	31.7667	0.030301	0.175009	0.444707	0.342984	0	0.000394276	0	0.00659964	4.48041e-06	318.81
JF0123	Faeces	Loxodonta africana	-16.6943	6.65572	44.532	2.06049	21.6124	77.2884	March	2004	Wet	Kruger Park	South Central	Granite	Leeupan	J Codron et al (2011; Oecologia)		-24.8787	31.7667	0.030301	0.175009	0.444707	0.342984	0	0.000394276	0	0.00659964	4.48041e-06	318.81
JF0124	Faeces	Loxodonta africana	-16.8885	4.05167	40.9778	2.1014	19.5003	75.246	March	2004	Wet	Kruger Park	South	Basalt	Lower Sabie	J Codron et al (2011; Oecologia)		-25.0938	31.9128	0.0521678	0.331367	0.548747	0.0604696	0.00020161	0.00127238	0	0.000573469	0.00520154	309.13
JF0125	Faeces	Loxodonta africana	-17.205	2.06763	41.2543	2.10458	19.6022	73.0249	March	2004	Wet	Kruger Park	South	Basalt	S128	J Codron et al (2011; Oecologia)	201m	-25.0938	31.9128	0.0521678	0.331367	0.548747	0.0604696	0.00020161	0.00127238	0	0.000573469	0.00520154	309.13
JF0126	Faeces	Loxodonta africana	-19.2446	3.37466	40.4847	2.1839	18.5378	58.7115	March	2004	Wet	Kruger Park	South	Basalt	S128	J Codron et al (2011; Oecologia)	201m	-25.0938	31.9128	0.0521678	0.331367	0.548747	0.0604696	0.00020161	0.00127238	0	0.000573469	0.00520154	309.13
JF0127	Faeces	Loxodonta africana	-18.7902	3.28147	31.9195	1.7148	18.6141	61.9007	March	2004	Wet	Kruger Park	South	Basalt	S128	J Codron et al (2011; Oecologia)	201m	-25.0938	31.9128	0.0521678	0.331367	0.548747	0.0604696	0.00020161	0.00127238	0	0.000573469	0.00520154	309.13
JF0128	Faeces	Loxodonta africana	-22.7378	0.125188	44.3195	2.51725	17.6063	34.1976	March	2004	Wet	Kruger Park	South	Basalt	S128	J Codron et al (2011; Oecologia)	201m	-25.0938	31.9128	0.0521678	0.331367	0.548747	0.0604696	0.00020161	0.00127238	0	0.000573469	0.00520154	309.13
JF0129	Faeces	Loxodonta africana	-18.4489	2.95808	34.9707	1.8564	18.8379	64.2952	March	2004	Wet	Kruger Park	South	Basalt	S128	J Codron et al (2011; Oecologia)	201m	-25.0938	31.9128	0.0521678	0.331367	0.548747	0.0604696	0.00020161	0.00127238	0	0.000573469	0.00520154	309.13
JF0130	Faeces	Loxodonta africana	-19.9031	3.35889	38.3119	2.02026	18.9638	54.0902	March	2004	Wet	Kruger Park	South	Basalt	S128	J Codron et al (2011; Oecologia)	201m	-25.0938	31.9128	0.0521678	0.331367	0.548747	0.0604696	0.00020161	0.00127238	0	0.000573469	0.00520154	309.13
JF0131	Faeces	Loxodonta africana	-20.097	4.81012	46.9548	1.47237	31.8906	52.7297	March	2004	Wet	Kruger Park	South	Basalt	Salitje	J Codron et al (2011; Oecologia)	184m	-25.1133	31.9275	0.053709	0.310632	0.572828	0.0566166	0.000179209	0.00112902	0	0.000219531	0.00468632	313.614
JF0132	Faeces	Loxodonta africana	-20.6468	5.06119	47.7715	1.81398	26.3351	48.8717	March	2004	Wet	Kruger Park	South	Basalt	Salitje	J Codron et al (2011; Oecologia)	184m	-25.1133	31.9275	0.053709	0.310632	0.572828	0.0566166	0.000179209	0.00112902	0	0.000219531	0.00468632	313.614
JF0168	Faeces	Loxodonta africana	-21.8973	2.68053	45.8256	1.85096	24.7578	43.0152	April	2004	Dry	Kruger Park	North Central	Basalt	Letaba	J Codron et al (2011; Oecologia)	266m	-23.8626	31.5591	0.0456433	0.185512	0.315879	0.432079	7.61468e-05	0.00700103	0	0.0095497	0.00425974	297.642
JF0169	Faeces	Loxodonta africana	-23.5847	5.47618	45.305	1.78205	25.423	30.3623	April	2004	Dry	Kruger Park	North Central	Basalt	Letaba	J Codron et al (2011; Oecologia)	266m	-23.8626	31.5591	0.0456433	0.185512	0.315879	0.432079	7.61468e-05	0.00700103	0	0.0095497	0.00425974	297.642
JF0171	Faeces	Loxodonta africana	-20.7351	5.04908	43.8066	0.97441	44.957	51.7297	April	2004	Dry	Kruger Park	North Central	Basalt	Letaba	J Codron et al (2011; Oecologia)	266m	-23.8626	31.5591	0.0456433	0.185512	0.315879	0.432079	7.61468e-05	0.00700103	0	0.0095497	0.00425974	297.642
JF0176	Faeces	Loxodonta africana	-22.4684	5.50971	45.2511	2.07567	21.8007	39.7888	April	2004	Dry	Kruger Park	North Central	Granite	Vudogwa	J Codron et al (2011; Oecologia)	323m	-23.9468	31.2439	0.00710716	0.132573	0.167177	0.661584	1.34351e-05	0.0235875	0	0.00681159	0.00114646	292.571
JF0177	Faeces	Loxodonta africana	-22.9588	5.11355	45.3117	2.11583	21.4156	37.631	April	2004	Dry	Kruger Park	South	Granite	Albasini Rd	J Codron et al (2011; Oecologia)	483m	-25.0479	31.27	0.0428204	0.413726	0.0675936	0.45261	0.000326907	0.0116298	1.79127e-05	0.00678444	0.00449161	249.848
JF0178	Faeces	Loxodonta africana	-24.1696	4.79434	45.2705	1.91562	23.6323	29.0298	April	2004	Dry	Kruger Park	South	Granite	Doispane Rd	J Codron et al (2011; Oecologia)	326m	-25.0021	31.4834	0.0906729	0.48686	0.0849126	0.308587	0.00197982	0.0113638	1.34377e-05	0.012067	0.00354307	232.981
JF0179	Faeces	Loxodonta africana	-24.4738	6.36979	45.8265	1.57218	29.1485	26.8691	April	2004	Dry	Kruger Park	South	Granite	Sabie River	J Codron et al (2011; Oecologia)	282m	-24.9349	31.7017	0.0520047	0.375286	0.101451	0.449254	2.23984e-05	0.00494557	0	0.0156699	0.0013663	255.614
JF0180	Faeces	Loxodonta africana	-26.549	7.20677	44.1058	1.7588	25.0772	12.1279	April	2004	Dry	Kruger Park	South	Granite	Sabie River	J Codron et al (2011; Oecologia)	282m	-24.9349	31.7017	0.0520047	0.375286	0.101451	0.449254	2.23984e-05	0.00494557	0	0.0156699	0.0013663	255.614
JF0181	Faeces	Loxodonta africana	-24.67	6.65447	44.6196	1.82416	24.4603	25.4755	April	2004	Dry	Kruger Park	South	Granite	Sabie River	J Codron et al (2011; Oecologia)	282m	-24.9349	31.7017	0.0520047	0.375286	0.101451	0.449254	2.23984e-05	0.00494557	0	0.0156699	0.0013663	255.614
JF0182	Faeces	Loxodonta africana	-22.6621	6.17588	43.6752	0.951108	45.9204	39.739	April	2004	Dry	Kruger Park	South Central	Granite	H1-2	J Codron et al (2011; Oecologia)	316m	-24.9089	31.7183	0.0424432	0.299311	0.221149	0.419432	2.23998e-05	0.00428285	0	0.0122796	0.00107967	278.396
JF0183	Faeces	Loxodonta africana	-22.6443	5.80275	43.331	1.8596	23.3012	39.8651	April	2004	Dry	Kruger Park	South Central	Granite	H1-2	J Codron et al (2011; Oecologia)	316m	-24.9089	31.7183	0.0424432	0.299311	0.221149	0.419432	2.23998e-05	0.00428285	0	0.0122796	0.00107967	278.396
JF0184	Faeces	Loxodonta africana	-22.8639	6.12472	45.5515	2.38826	19.0731	38.305	April	2004	Dry	Kruger Park	South Central	Granite	H1-2	J Codron et al (2011; Oecologia)	316m	-24.9089	31.7183	0.0424432	0.299311	0.221149	0.419432	2.23998e-05	0.00428285	0	0.0122796	0.00107967	278.396
JF0185	Faeces	Loxodonta africana	-22.7439	6.22969	43.6752	5.03293	8.67789	39.1575	April	2004	Dry	Kruger Park	South Central	Granite	H1-2	J Codron et al (2011; Oecologia)	316m	-24.9089	31.7183	0.0424432	0.299311	0.221149	0.419432	2.23998e-05	0.00428285	0	0.0122796	0.00107967	278.396
JF0186	Faeces	Loxodonta africana	-25.425	7.08188	43.1237	2.43847	17.6847	20.1122	April	2004	Dry	Kruger Park	South Central	Granite	H1-2	J Codron et al (2011; Oecologia)	316m	-24.9089	31.7183	0.0424432	0.299311	0.221149	0.419432	2.23998e-05	0.00428285	0	0.0122796	0.00107967	278.396
JF0187	Faeces	Loxodonta africana	-25.5613	6.94155	44.4153	1.81871	24.4214	19.144	April	2004	Dry	Kruger Park	South Central	Granite	H1-2	J Codron et al (2011; Oecologia)	316m	-24.9089	31.7183	0.0424432	0.299311	0.221149	0.419432	2.23998e-05	0.00428285	0	0.0122796	0.00107967	278.396
JF0188	Faeces	Loxodonta africana	-23.1536	5.56073	41.95	1.63703	25.6257	38.7693	April	2004	Dry	Kruger Park	South	Basalt	Mativuhlungu	J Codron et al (2011; Oecologia)	194m	-25.1323	31.9096	0.0633594	0.378091	0.485549	0.0668584	0.000179209	0.00113798	0	0.00019713	0.00462807	296.231
JF0189	Faeces	Loxodonta africana	-25.2995	5.88012	42.6122	1.36329	31.257	24.2807	April	2004	Dry	Kruger Park	South	Basalt	Mativuhlungu	J Codron et al (2011; Oecologia)	194m	-25.1323	31.9096	0.0633594	0.378091	0.485549	0.0668584	0.000179209	0.00113798	0	0.00019713	0.00462807	296.231
JF0190	Faeces	Loxodonta africana	-25.2139	6.23287	44.896	1.59758	28.1026	24.8591	April	2004	Dry	Kruger Park	South	Basalt	Mativuhlungu	J Codron et al (2011; Oecologia)	194m	-25.1323	31.9096	0.0633594	0.378091	0.485549	0.0668584	0.000179209	0.00113798	0	0.00019713	0.00462807	296.231
JF0191	Faeces	Loxodonta africana	-23.4389	5.67243	41.6482	1.73444	24.0125	36.8432	April	2004	Dry	Kruger Park	South	Basalt	Mativuhlungu	J Codron et al (2011; Oecologia)	194m	-25.1323	31.9096	0.0633594	0.378091	0.485549	0.0668584	0.000179209	0.00113798	0	0.00019713	0.00462807	296.231
JF0192	Faeces	Loxodonta africana	-18.8703	3.86624	44.1231	1.9139	23.0541	67.6893	April	2004	Dry	Kruger Park	South	Basalt	Mlondozi	J Codron et al (2011; Oecologia)	278m	-24.9301	31.9148	0.0321974	0.0505318	0.819491	0.0961395	0.000546629	0.000170262	4.48057e-06	4.48057e-06	0.000914036	369.965
JF0193	Faeces	Loxodonta africana	-22.3915	5.18309	43.4798	1.13536	38.2959	43.9147	April	2004	Dry	Kruger Park	South Central	Basalt	Muntshe	J Codron et al (2011; Oecologia)	270m	-24.9271	31.9179	0.0353938	0.0459806	0.822744	0.094367	0.000501785	0.000161288	4.48023e-06	4.48023e-06	0.000842283	370.143
JF0194	Faeces	Loxodonta africana	-20.4832	5.19833	43.3054	1.7963	24.1081	56.7993	April	2004	Dry	Kruger Park	South Central	Basalt	Muntshe	J Codron et al (2011; Oecologia)	270m	-24.9271	31.9179	0.0353938	0.0459806	0.822744	0.094367	0.000501785	0.000161288	4.48023e-06	4.48023e-06	0.000842283	370.143
JF0195	Faeces	Loxodonta africana	-20.9252	5.26675	43.2176	2.14235	20.173	53.8149	April	2004	Dry	Kruger Park	South Central	Basalt	Muntshe	J Codron et al (2011; Oecologia)	270m	-24.9271	31.9179	0.0353938	0.0459806	0.822744	0.094367	0.000501785	0.000161288	4.48023e-06	4.48023e-06	0.000842283	370.143
JF0196	Faeces	Loxodonta africana	-19.0381	5.89397	43.4798	3.46618	12.544	66.5563	April	2004	Dry	Kruger Park	South Central	Basalt	Muntshe	J Codron et al (2011; Oecologia)	270m	-24.9271	31.9179	0.0353938	0.0459806	0.822744	0.094367	0.000501785	0.000161288	4.48023e-06	4.48023e-06	0.000842283	370.143
JF0197	Faeces	Loxodonta africana	-19.5842	4.87025	37.6616	1.3424	28.0554	62.8691	April	2004	Dry	Kruger Park	South Central	Basalt	Muntshe	J Codron et al (2011; Oecologia)	270m	-24.9271	31.9179	0.0353938	0.0459806	0.822744	0.094367	0.000501785	0.000161288	4.48023e-06	4.48023e-06	0.000842283	370.143
JF0198	Faeces	Loxodonta africana	-23.8022	2.87611	44.6959	2.00274	22.3174	34.3902	April	2004	Dry	Kruger Park	South	Basalt	Mlondozi	J Codron et al (2011; Oecologia)	278m	-24.9301	31.9148	0.0321974	0.0505318	0.819491	0.0961395	0.000546629	0.000170262	4.48057e-06	4.48057e-06	0.000914036	369.965
JF0222	Faeces	Loxodonta africana	-22.9417	6.35715	47.3632	1.96433	24.1116	36.5162	May	2004	Dry	Kruger Park	North Central	Granite	Masorini	J Codron et al (2011; Oecologia)	421m	-23.9201	31.2686	0.00305868	0.110614	0.14524	0.70887	4.4783e-06	0.0239947	0	0.00782807	0.000389612	293.186
JF0223	Faeces	Loxodonta africana	-22.2653	6.19905	46.0573	1.76891	26.0372	41.1933	May	2004	Dry	Kruger Park	North Central	Granite	Masorini	J Codron et al (2011; Oecologia)	421m	-23.9201	31.2686	0.00305868	0.110614	0.14524	0.70887	4.4783e-06	0.0239947	0	0.00782807	0.000389612	293.186
JF0224	Faeces	Loxodonta africana	-21.8496	5.37753	58.7773	1.43484	40.9645	44.0674	May	2004	Dry	Kruger Park	North Central	Granite	Masorini	J Codron et al (2011; Oecologia)	421m	-23.9201	31.2686	0.00305868	0.110614	0.14524	0.70887	4.4783e-06	0.0239947	0	0.00782807	0.000389612	293.186
JF0225	Faeces	Loxodonta africana	-21.5083	6.09805	44.2673	1.71018	25.8845	46.4273	May	2004	Dry	Kruger Park	North Central	Granite	Masorini	J Codron et al (2011; Oecologia)	421m	-23.9201	31.2686	0.00305868	0.110614	0.14524	0.70887	4.4783e-06	0.0239947	0	0.00782807	0.000389612	293.186
JF0226	Faeces	Loxodonta africana	-24.5008	4.00465	46.464	1.85299	25.0751	25.7367	May	2004	Dry	Kruger Park	North Central	Granite	Erfplaas	J Codron et al (2011; Oecologia)	414m	-23.9213	31.3037	0.00296942	0.0902963	0.181108	0.702489	4.47876e-06	0.0177941	0	0.00412046	0.00121822	301.546
JF0227	Faeces	Loxodonta africana	-22.0737	5.66956	57.1603	1.27893	44.6937	41.6922	May	2004	Dry	Kruger Park	North Central	Basalt	Letaba	J Codron et al (2011; Oecologia)	266m	-23.8626	31.5591	0.0456433	0.185512	0.315879	0.432079	7.61468e-05	0.00700103	0	0.0095497	0.00425974	297.642
JF0228	Faeces	Loxodonta africana	-23.0251	5.5435	44.6315	1.48207	30.1143	34.5585	May	2004	Dry	Kruger Park	North Central	Basalt	Letaba	J Codron et al (2011; Oecologia)	266m	-23.8626	31.5591	0.0456433	0.185512	0.315879	0.432079	7.61468e-05	0.00700103	0	0.0095497	0.00425974	297.642
JF0229	Faeces	Loxodonta africana	-24.0964	6.68766	49.6153	2.23887	22.1609	26.5252	May	2004	Dry	Kruger Park	North Central	Basalt	Letaba	J Codron et al (2011; Oecologia)	266m	-23.8626	31.5591	0.0456433	0.185512	0.315879	0.432079	7.61468e-05	0.00700103	0	0.0095497	0.00425974	297.642
JF0230	Faeces	Loxodonta africana	-21.9941	5.908	43.9795	1.78537	24.6333	42.2892	May	2004	Dry	Kruger Park	North Central	Basalt	Letaba	J Codron et al (2011; Oecologia)	266m	-23.8626	31.5591	0.0456433	0.185512	0.315879	0.432079	7.61468e-05	0.00700103	0	0.0095497	0.00425974	297.642
JF0231	Faeces	Loxodonta africana	-24.1345	6.63582	46.856	2.25552	20.774	26.2396	May	2004	Dry	Kruger Park	North Central	Basalt	Letaba	J Codron et al (2011; Oecologia)	266m	-23.8626	31.5591	0.0456433	0.185512	0.315879	0.432079	7.61468e-05	0.00700103	0	0.0095497	0.00425974	297.642
JF0232	Faeces	Loxodonta africana	-25.3455	7.80074	44.816	1.76853	25.3409	20.6765	May	2004	Dry	Kruger Park	South Central	Granite	Ngwenyeni	J Codron et al (2011; Oecologia)	329m	-24.6096	31.6691	0.0179418	0.34691	0.37202	0.249371	0	0.00271479	0	0.0110428	0	294.795
JF0233	Faeces	Loxodonta africana	-24.2122	4.40281	37.3804	1.73298	21.57	28.7272	May	2004	Dry	Kruger Park	South Central	Granite	Ngwenyeni	J Codron et al (2011; Oecologia)	329m	-24.6096	31.6691	0.0179418	0.34691	0.37202	0.249371	0	0.00271479	0	0.0110428	0	294.795
JF0234	Faeces	Loxodonta africana	-25.5828	5.73662	46.75	1.21444	38.4952	18.991	May	2004	Dry	Kruger Park	South Central	Granite	Ngwenyeni	J Codron et al (2011; Oecologia)	329m	-24.6096	31.6691	0.0179418	0.34691	0.37202	0.249371	0	0.00271479	0	0.0110428	0	294.795
JF0235	Faeces	Loxodonta africana	-25.7084	7.18105	44.4839	1.87161	23.7677	18.099	May	2004	Dry	Kruger Park	South Central	Granite	Nhlanguleni	J Codron et al (2011; Oecologia)	349m	-24.7099	31.6574	0.0141874	0.165267	0.305399	0.491067	0	0.000918352	0	0.0231245	3.58381e-05	303.952
JF0236	Faeces	Loxodonta africana	-23.4309	5.60286	41.2869	1.52334	27.1029	34.2773	May	2004	Dry	Kruger Park	South Central	Granite	Lugmag	J Codron et al (2011; Oecologia)	342m	-24.7242	31.6665	0.0165488	0.173611	0.265794	0.517467	0	0.000846706	0	0.0256969	3.58394e-05	297.935
JF0237	Faeces	Loxodonta africana	-21.9495	6.66189	49.3666	1.61997	30.4737	46.8993	May	2004	Dry	Kruger Park	South Central	Basalt	Orpen Dam	J Codron et al (2011; Oecologia)		-24.7918	31.8911	0.046218	0.0771809	0.588083	0.283881	8.96045e-06	0.0010887	0	0.00166664	0.00187273	340.456
JF0238	Faeces	Loxodonta africana	-18.2355	4.54589	49.7852	1.20259	41.3985	71.9754	May	2004	Dry	Kruger Park	South Central	Basalt	Orpen Dam	J Codron et al (2011; Oecologia)		-24.7918	31.8911	0.046218	0.0771809	0.588083	0.283881	8.96045e-06	0.0010887	0	0.00166664	0.00187273	340.456
JF0239	Faeces	Loxodonta africana	-24.2406	6.80314	46.5849	1.59649	29.1796	31.4307	May	2004	Dry	Kruger Park	South Central	Basalt	Orpen Dam	J Codron et al (2011; Oecologia)		-24.7918	31.8911	0.046218	0.0771809	0.588083	0.283881	8.96045e-06	0.0010887	0	0.00166664	0.00187273	340.456
JF0240	Faeces	Loxodonta africana	-24.1406	7.21599	47.2745	1.96186	24.0968	32.1054	May	2004	Dry	Kruger Park	South Central	Basalt	Orpen Dam	J Codron et al (2011; Oecologia)		-24.7918	31.8911	0.046218	0.0771809	0.588083	0.283881	8.96045e-06	0.0010887	0	0.00166664	0.00187273	340.456
JF0241	Faeces	Loxodonta africana	-24.0941	6.94753	46.5523	1.92062	24.2381	32.4192	May	2004	Dry	Kruger Park	South Central	Basalt	Orpen Dam	J Codron et al (2011; Oecologia)		-24.7918	31.8911	0.046218	0.0771809	0.588083	0.283881	8.96045e-06	0.0010887	0	0.00166664	0.00187273	340.456
JF0257	Faeces	Loxodonta africana	-25.7795	6.23717	54.5431	1.29717	42.0478	21.0403	May	2004	Dry	Kruger Park	South	Basalt	Mativuhlungu	J Codron et al (2011; Oecologia)	194m	-25.1323	31.9096	0.0633594	0.378091	0.485549	0.0668584	0.000179209	0.00113798	0	0.00019713	0.00462807	296.231
JF0258	Faeces	Loxodonta africana	-25.881	5.60085	45.5342	1.69334	26.8902	20.355	May	2004	Dry	Kruger Park	South	Basalt	Mativuhlungu	J Codron et al (2011; Oecologia)	194m	-25.1323	31.9096	0.0633594	0.378091	0.485549	0.0668584	0.000179209	0.00113798	0	0.00019713	0.00462807	296.231
JF0259	Faeces	Loxodonta africana	-22.3814	4.3246	55.0141	1.19708	45.9569	43.9833	May	2004	Dry	Kruger Park	South	Basalt	Mativuhlungu	J Codron et al (2011; Oecologia)	194m	-25.1323	31.9096	0.0633594	0.378091	0.485549	0.0668584	0.000179209	0.00113798	0	0.00019713	0.00462807	296.231
JF0260	Faeces	Loxodonta africana	-26.0405	6.1657	60.0905	1.56355	38.432	19.2782	May	2004	Dry	Kruger Park	South	Basalt	Mativuhlungu	J Codron et al (2011; Oecologia)	194m	-25.1323	31.9096	0.0633594	0.378091	0.485549	0.0668584	0.000179209	0.00113798	0	0.00019713	0.00462807	296.231
JF0261	Faeces	Loxodonta africana	-25.9717	6.26844	57.4522	1.48399	38.7147	19.7426	May	2004	Dry	Kruger Park	South	Basalt	Mativuhlungu	J Codron et al (2011; Oecologia)	194m	-25.1323	31.9096	0.0633594	0.378091	0.485549	0.0668584	0.000179209	0.00113798	0	0.00019713	0.00462807	296.231
JF0267	Faeces	Loxodonta africana	-26.3709	7.65924	57.7362	1.83555	31.4545	13.3931	May	2004	Dry	Kruger Park	South	Granite	Sabie River	J Codron et al (2011; Oecologia)	282m	-24.9349	31.7017	0.0520047	0.375286	0.101451	0.449254	2.23984e-05	0.00494557	0	0.0156699	0.0013663	255.614
JF0268	Faeces	Loxodonta africana	-25.817	8.23437	59.9316	1.54667	38.7489	17.3274	May	2004	Dry	Kruger Park	South	Granite	Sabie River	J Codron et al (2011; Oecologia)	282m	-24.9349	31.7017	0.0520047	0.375286	0.101451	0.449254	2.23984e-05	0.00494557	0	0.0156699	0.0013663	255.614
JF0269	Faeces	Loxodonta africana	-25.3908	7.83675	60.6913	1.39958	43.3638	20.3549	May	2004	Dry	Kruger Park	South	Granite	Sabie River	J Codron et al (2011; Oecologia)	282m	-24.9349	31.7017	0.0520047	0.375286	0.101451	0.449254	2.23984e-05	0.00494557	0	0.0156699	0.0013663	255.614
JF0270	Faeces	Loxodonta africana	-26.7511	7.78335	49.6964	1.89902	26.1695	10.6919	May	2004	Dry	Kruger Park	South	Granite	Sabie River	J Codron et al (2011; Oecologia)	282m	-24.9349	31.7017	0.0520047	0.375286	0.101451	0.449254	2.23984e-05	0.00494557	0	0.0156699	0.0013663	255.614
JF0271	Faeces	Loxodonta africana	-26.4097	7.01963	61.5293	1.42627	43.1399	13.1171	May	2004	Dry	Kruger Park	South	Granite	Sabie River	J Codron et al (2011; Oecologia)	282m	-24.9349	31.7017	0.0520047	0.375286	0.101451	0.449254	2.23984e-05	0.00494557	0	0.0156699	0.0013663	255.614
JF0272	Faeces	Loxodonta africana	-25.4735	3.42916	44.4038	1.74973	25.3775	19.7676	June	2004	Dry	Kruger Park	South	Granite	Albasini Rd	J Codron et al (2011; Oecologia)	483m	-25.0479	31.27	0.0428204	0.413726	0.0675936	0.45261	0.000326907	0.0116298	1.79127e-05	0.00678444	0.00449161	249.848
JF0273	Faeces	Loxodonta africana	-25.0572	3.66653	42.7223	1.88969	22.6081	22.7249	June	2004	Dry	Kruger Park	South	Granite	Albasini Rd	J Codron et al (2011; Oecologia)	483m	-25.0479	31.27	0.0428204	0.413726	0.0675936	0.45261	0.000326907	0.0116298	1.79127e-05	0.00678444	0.00449161	249.848
JF0274	Faeces	Loxodonta africana	-25.3825	3.67196	44.9013	1.93826	23.1658	20.4141	June	2004	Dry	Kruger Park	South	Granite	Albasini Rd	J Codron et al (2011; Oecologia)	483m	-25.0479	31.27	0.0428204	0.413726	0.0675936	0.45261	0.000326907	0.0116298	1.79127e-05	0.00678444	0.00449161	249.848
JF0275	Faeces	Loxodonta africana	-25.533	3.84959	45.4232	2.02728	22.406	19.3451	June	2004	Dry	Kruger Park	South	Granite	Albasini Rd	J Codron et al (2011; Oecologia)	483m	-25.0479	31.27	0.0428204	0.413726	0.0675936	0.45261	0.000326907	0.0116298	1.79127e-05	0.00678444	0.00449161	249.848
JF0276	Faeces	Loxodonta africana	-26.6729	4.05205	47.1733	2.22838	21.1694	11.2478	June	2004	Dry	Kruger Park	South	Granite	Albasini Rd	J Codron et al (2011; Oecologia)	483m	-25.0479	31.27	0.0428204	0.413726	0.0675936	0.45261	0.000326907	0.0116298	1.79127e-05	0.00678444	0.00449161	249.848
JF0277	Faeces	Loxodonta africana	-27.2351	4.56246	46.1166	2.02123	22.8161	11.2119	June	2004	Dry	Kruger Park	South	Basalt	S29	J Codron et al (2011; Oecologia)	181m	-25.1342	31.9082	0.0661992	0.382467	0.477428	0.0676644	0.000179232	0.00127254	0	0.000174751	0.00461521	294.384
JF0278	Faeces	Loxodonta africana	-25.2978	3.76582	46.2904	1.75756	26.3379	24.2925	June	2004	Dry	Kruger Park	South	Basalt	S29	J Codron et al (2011; Oecologia)	181m	-25.1146	31.9309	0.0551326	0.301762	0.579339	0.0577134	0.00017922	0.00109772	0	0.000134415	0.00464181	314.915
JF0279	Faeces	Loxodonta africana	-25.8502	6.08826	46.6145	1.55208	30.0335	20.563	June	2004	Dry	Kruger Park	South	Basalt	S29	J Codron et al (2011; Oecologia)	181m	-25.0257	31.8797	0.0382284	0.343267	0.510854	0.100083	0.000945404	0.00112911	8.96118e-06	0.00068553	0.00479871	306.843
JF0280	Faeces	Loxodonta africana	-25.5672	6.57385	46.6627	1.53527	30.3939	22.4734	June	2004	Dry	Kruger Park	South	Basalt	S29	J Codron et al (2011; Oecologia)	181m	-25.0217	31.8749	0.0378918	0.34561	0.496796	0.111655	0.000940911	0.00147857	8.96106e-06	0.000999158	0.00461942	305.126
JF0281	Faeces	Loxodonta africana	-25.4312	1.48613	45.0451	1.89711	23.7441	23.3919	June	2004	Dry	Kruger Park	South	Basalt	S29	J Codron et al (2011; Oecologia)	181m	-25.0296	31.8938	0.0373019	0.307899	0.576338	0.0715035	0.000936355	0.00081091	8.96033e-06	0.000483858	0.00471762	317.296
JF0282	Faeces	Loxodonta africana	-24.7294	5.73992	46.106	1.98866	23.1844	25.0536	June	2004	Dry	Kruger Park	South Central	Granite	N'watindlopfu	J Codron et al (2011; Oecologia)		-24.9027	31.7536	0.0309518	0.234927	0.325256	0.398498	2.23996e-05	0.00241468	0	0.00761139	0.000318075	299.733
JF0283	Faeces	Loxodonta africana	-23.3343	7.93133	42.4483	2.16958	19.5652	34.9637	June	2004	Dry	Kruger Park	South Central	Granite	Leeupan	J Codron et al (2011; Oecologia)		-24.8554	31.7959	0.0365002	0.112502	0.571562	0.270864	0	0.000367377	0	0.00812709	7.61635e-05	336.035
JF0285	Faeces	Loxodonta africana	-24.0597	7.21148	43.7082	1.28423	34.0345	29.8108	June	2004	Dry	Kruger Park	South Central	Granite	Leeupan	J Codron et al (2011; Oecologia)		-24.8508	31.7984	0.0374964	0.104971	0.593114	0.255785	0	0.000336029	0	0.00822151	7.61666e-05	338.725
JF0286	Faeces	Loxodonta africana	-22.2205	6.5211	45.2375	1.72478	26.2279	42.8754	June	2004	Dry	Kruger Park	South Central	Granite	Leeupan	J Codron et al (2011; Oecologia)		-24.8379	31.8162	0.0422965	0.0828771	0.656619	0.209717	0	0.000295686	0	0.00791183	0.000282245	346.368
JF0287	Faeces	Loxodonta africana	-25.1329	6.29925	36.4462	1.9322	18.8625	25.4059	June	2004	Dry	Kruger Park	South Central	Basalt	Tshokwane	J Codron et al (2011; Oecologia)	258m	-24.7982	31.8794	0.0469436	0.0779108	0.605863	0.263145	4.48021e-06	0.00110213	0	0.00313166	0.00189961	341.565
JF0288	Faeces	Loxodonta africana	-24.7346	5.94553	43.1193	1.93029	22.3382	28.095	June	2004	Dry	Kruger Park	South Central	Basalt	Tshokwane	J Codron et al (2011; Oecologia)	258m	-24.7982	31.8794	0.0469436	0.0779108	0.605863	0.263145	4.48021e-06	0.00110213	0	0.00313166	0.00189961	341.565
JF0289	Faeces	Loxodonta africana	-24.3951	4.92353	45.169	1.9092	23.6585	30.3871	June	2004	Dry	Kruger Park	South Central	Basalt	Tshokwane	J Codron et al (2011; Oecologia)	258m	-24.7982	31.8794	0.0469436	0.0779108	0.605863	0.263145	4.48021e-06	0.00110213	0	0.00313166	0.00189961	341.565
JF0290	Faeces	Loxodonta africana	-24.4153	6.39228	42.8668	1.72594	24.8368	30.2508	June	2004	Dry	Kruger Park	South Central	Basalt	Tshokwane	J Codron et al (2011; Oecologia)	258m	-24.7982	31.8794	0.0469436	0.0779108	0.605863	0.263145	4.48021e-06	0.00110213	0	0.00313166	0.00189961	341.565
JF0291	Faeces	Loxodonta africana	-25.305	6.25271	43.8281	1.81483	24.15	24.2438	June	2004	Dry	Kruger Park	South Central	Basalt	Tshokwane	J Codron et al (2011; Oecologia)	258m	-24.7996	31.8761	0.0474166	0.0772026	0.606016	0.262581	4.48045e-06	0.00112907	0	0.00375013	0.00189971	341.363
JF0292	Faeces	Loxodonta africana	-23.0486	5.39013	47.6069	1.71552	27.7508	35.777	June	2004	Dry	Kruger Park	North Central	Granite	Masorini	J Codron et al (2011; Oecologia)	421m	-23.9201	31.2686	0.00305868	0.110614	0.14524	0.70887	4.4783e-06	0.0239947	0	0.00782807	0.000389612	293.186
JF0293	Faeces	Loxodonta africana	-22.2455	4.95653	50.3848	1.57865	31.9163	41.3301	June	2004	Dry	Kruger Park	North Central	Granite	Masorini	J Codron et al (2011; Oecologia)	421m	-23.9201	31.2686	0.00305868	0.110614	0.14524	0.70887	4.4783e-06	0.0239947	0	0.00782807	0.000389612	293.186
JF0294	Faeces	Loxodonta africana	-23.1487	5.75704	48.1467	1.81676	26.5014	35.0854	June	2004	Dry	Kruger Park	North Central	Granite	Masorini	J Codron et al (2011; Oecologia)	421m	-23.9201	31.2686	0.00305868	0.110614	0.14524	0.70887	4.4783e-06	0.0239947	0	0.00782807	0.000389612	293.186
JF0295	Faeces	Loxodonta africana	-22.79	5.56079	45.6072	2.04597	22.2912	37.5651	June	2004	Dry	Kruger Park	North Central	Granite	Erfplaas	J Codron et al (2011; Oecologia)	414m	-23.9213	31.3037	0.00296942	0.0902963	0.181108	0.702489	4.47876e-06	0.0177941	0	0.00412046	0.00121822	301.546
JF0296	Faeces	Loxodonta africana	-19.2523	4.80913	42.6974	1.16388	36.6854	62.0252	June	2004	Dry	Kruger Park	North Central	Granite	Erfplaas	J Codron et al (2011; Oecologia)	414m	-23.9213	31.3037	0.00296942	0.0902963	0.181108	0.702489	4.47876e-06	0.0177941	0	0.00412046	0.00121822	301.546
JF0302	Faeces	Loxodonta africana	-24.5375	5.57457	49.5396	1.85562	26.697	23.2178	June	2004	Dry	Kruger Park	North Central	Basalt	Letaba	J Codron et al (2011; Oecologia)	266m	-23.8626	31.5591	0.0456433	0.185512	0.315879	0.432079	7.61468e-05	0.00700103	0	0.0095497	0.00425974	297.642
JF0303	Faeces	Loxodonta africana	-23.6271	6.46603	47.7623	1.04705	45.616	30.044	June	2004	Dry	Kruger Park	North Central	Basalt	Letaba	J Codron et al (2011; Oecologia)	266m	-23.8626	31.5591	0.0456433	0.185512	0.315879	0.432079	7.61468e-05	0.00700103	0	0.0095497	0.00425974	297.642
JF0304	Faeces	Loxodonta africana	-24.0786	6.52731	44.4154	1.96918	22.5553	26.6588	June	2004	Dry	Kruger Park	North Central	Basalt	Letaba	J Codron et al (2011; Oecologia)	266m	-23.8626	31.5591	0.0456433	0.185512	0.315879	0.432079	7.61468e-05	0.00700103	0	0.0095497	0.00425974	297.642
JF0305	Faeces	Loxodonta africana	-24.0751	5.88808	46.2816	1.61792	28.6057	26.6847	June	2004	Dry	Kruger Park	North Central	Basalt	Letaba	J Codron et al (2011; Oecologia)	266m	-23.8626	31.5591	0.0456433	0.185512	0.315879	0.432079	7.61468e-05	0.00700103	0	0.0095497	0.00425974	297.642
JF0306	Faeces	Loxodonta africana	-22.8333	5.67947	39.309	0.893481	43.9954	35.9968	June	2004	Dry	Kruger Park	North Central	Basalt	Letaba	J Codron et al (2011; Oecologia)	266m	-23.8626	31.5591	0.0456433	0.185512	0.315879	0.432079	7.61468e-05	0.00700103	0	0.0095497	0.00425974	297.642
JF0332	Faeces	Loxodonta africana	-26.5305	6.11774	46.1794	1.49516	30.8859	12.2591	June	2004	Dry	Kruger Park	South	Granite	Maroela Loop	J Codron et al (2011; Oecologia)	255m	-24.9397	31.6699	0.0613997	0.446906	0.0628869	0.408891	2.23988e-05	0.00539364	0	0.0125881	0.00191286	243.343
JF0333	Faeces	Loxodonta africana	-26.5809	5.87727	48.6638	1.69045	28.7875	11.9007	June	2004	Dry	Kruger Park	South	Granite	Maroela Loop	J Codron et al (2011; Oecologia)	255m	-24.9397	31.6699	0.0613997	0.446906	0.0628869	0.408891	2.23988e-05	0.00539364	0	0.0125881	0.00191286	243.343
JF0334	Faeces	Loxodonta africana	-26.6035	6.22168	47.6246	1.51772	31.3791	11.7407	June	2004	Dry	Kruger Park	South	Granite	Maroela Loop	J Codron et al (2011; Oecologia)	255m	-24.9397	31.6699	0.0613997	0.446906	0.0628869	0.408891	2.23988e-05	0.00539364	0	0.0125881	0.00191286	243.343
JF0335	Faeces	Loxodonta africana	-26.3322	5.9851	48.2338	1.75163	27.5365	13.6674	June	2004	Dry	Kruger Park	South	Granite	Maroela Loop	J Codron et al (2011; Oecologia)	255m	-24.9397	31.6699	0.0613997	0.446906	0.0628869	0.408891	2.23988e-05	0.00539364	0	0.0125881	0.00191286	243.343
JF0336	Faeces	Loxodonta africana	-26.6305	7.91969	47.8738	1.96352	24.3816	11.5486	June	2004	Dry	Kruger Park	South	Granite	Maroela Loop	J Codron et al (2011; Oecologia)	255m	-24.9397	31.6699	0.0613997	0.446906	0.0628869	0.408891	2.23988e-05	0.00539364	0	0.0125881	0.00191286	243.343
JF0337	Faeces	Loxodonta africana	-26.6665	2.1046	47.8526	2.00794	23.8317	15.0512	June	2004	Dry	Kruger Park	South	Basalt	Hlanganzwane	J Codron et al (2011; Oecologia)	238m	-25.2367	31.9857	0.0690173	0.144084	0.705851	0.0779923	0.000156827	0.00112915	0	0.00029125	0.00147865	341.457
JF0338	Faeces	Loxodonta africana	-24.6368	5.08836	44.9069	1.59661	28.1263	28.7555	June	2004	Dry	Kruger Park	South	Basalt	Hlanganzwane	J Codron et al (2011; Oecologia)	238m	-25.2367	31.9857	0.0690173	0.144084	0.705851	0.0779923	0.000156827	0.00112915	0	0.00029125	0.00147865	341.457
JF0339	Faeces	Loxodonta africana	-24.169	5.28286	46.6332	1.85684	25.1143	31.9141	June	2004	Dry	Kruger Park	South	Basalt	Hlanganzwane	J Codron et al (2011; Oecologia)	238m	-25.2367	31.9857	0.0690173	0.144084	0.705851	0.0779923	0.000156827	0.00112915	0	0.00029125	0.00147865	341.457
JF0340	Faeces	Loxodonta africana	-27.4205	5.64414	47.5385	1.89943	25.0278	9.96049	June	2004	Dry	Kruger Park	South	Basalt	Hlanganzwane	J Codron et al (2011; Oecologia)	238m	-25.2367	31.9857	0.0690173	0.144084	0.705851	0.0779923	0.000156827	0.00112915	0	0.00029125	0.00147865	341.457
JF0341	Faeces	Loxodonta africana	-24.6557	2.02065	45.1737	1.6548	27.2986	28.6276	June	2004	Dry	Kruger Park	South	Basalt	Hlanganzwane	J Codron et al (2011; Oecologia)	238m	-25.2367	31.9857	0.0690173	0.144084	0.705851	0.0779923	0.000156827	0.00112915	0	0.00029125	0.00147865	341.457
JF0349	Faeces	Loxodonta africana	-19.9402	4.66733	38.6303	2.0918	18.4675	50.5944	March	2004	Wet	Kruger Park	North Central	Basalt	Letaba	J Codron et al (2011; Oecologia)	266m	-23.8626	31.5591	0.0456433	0.185512	0.315879	0.432079	7.61468e-05	0.00700103	0	0.0095497	0.00425974	297.642
JF0351	Faeces	Loxodonta africana	-25.4577	5.65055	41.0537	2.49584	16.4489	10.045	March	2004	Wet	Kruger Park	North Central	Basalt	Twisappel	J Codron et al (2011; Oecologia)		-23.7157	31.5418	0.043177	0.0807009	0.616859	0.217977	4.92734e-05	0.00587698	0	0.00748508	0.0278753	332.594
JF0352	Faeces	Loxodonta africana	-18.3655	4.5885	45.4235	0.981507	46.2793	62.1677	March	2004	Wet	Kruger Park	North Central	Basalt	Twisappel	J Codron et al (2011; Oecologia)		-23.7157	31.5418	0.043177	0.0807009	0.616859	0.217977	4.92734e-05	0.00587698	0	0.00748508	0.0278753	332.594
JF0364	Faeces	Loxodonta africana	-24.0209	1.70155	45.7751	2.06292	22.1895	20.6048	March	2004	Wet	Kruger Park	North Central	Basalt	Twisappel	J Codron et al (2011; Oecologia)		-23.7157	31.5418	0.043177	0.0807009	0.616859	0.217977	4.92734e-05	0.00587698	0	0.00748508	0.0278753	332.594
JF0371	Faeces	Loxodonta africana	-22.7829	6.54509	43.2988	2.16915	19.9612	36.3747	April	2004	Dry	Kruger Park	North Central	Basalt	Letaba	J Codron et al (2011; Oecologia)	266m	-23.8626	31.5591	0.0456433	0.185512	0.315879	0.432079	7.61468e-05	0.00700103	0	0.0095497	0.00425974	297.642
JF0372	Faeces	Loxodonta africana	-22.4697	6.22938	41.6429	2.57495	16.1723	38.7229	April	2004	Dry	Kruger Park	North Central	Basalt	Letaba	J Codron et al (2011; Oecologia)	266m	-23.8626	31.5591	0.0456433	0.185512	0.315879	0.432079	7.61468e-05	0.00700103	0	0.0095497	0.00425974	297.642
JF0396	Faeces	Loxodonta africana	-20.1392	7.11927	44.2772	1.11162	39.8314	55.8934	July	2004	Dry	Kruger Park	North Central	Granite	Masorini	J Codron et al (2011; Oecologia)	421m	-23.9201	31.2686	0.00305868	0.110614	0.14524	0.70887	4.4783e-06	0.0239947	0	0.00782807	0.000389612	293.186
JF0397	Faeces	Loxodonta africana	-23.0248	6.57837	46.3847	1.36044	34.0954	35.9419	July	2004	Dry	Kruger Park	North Central	Granite	Masorini	J Codron et al (2011; Oecologia)	421m	-23.9201	31.2686	0.00305868	0.110614	0.14524	0.70887	4.4783e-06	0.0239947	0	0.00782807	0.000389612	293.186
JF0398	Faeces	Loxodonta africana	-24.1019	6.62458	50.9374	1.9703	25.8526	28.4947	July	2004	Dry	Kruger Park	North Central	Granite	Masorini	J Codron et al (2011; Oecologia)	421m	-23.9201	31.2686	0.00305868	0.110614	0.14524	0.70887	4.4783e-06	0.0239947	0	0.00782807	0.000389612	293.186
JF0399	Faeces	Loxodonta africana	-24.1049	6.98705	50.9672	2.33772	21.8021	28.4738	July	2004	Dry	Kruger Park	North Central	Granite	Masorini	J Codron et al (2011; Oecologia)	421m	-23.9201	31.2686	0.00305868	0.110614	0.14524	0.70887	4.4783e-06	0.0239947	0	0.00782807	0.000389612	293.186
JF0400	Faeces	Loxodonta africana	-21.4657	6.37601	46.047	1.29259	35.6239	46.7217	July	2004	Dry	Kruger Park	North Central	Granite	Masorini	J Codron et al (2011; Oecologia)	421m	-23.9201	31.2686	0.00305868	0.110614	0.14524	0.70887	4.4783e-06	0.0239947	0	0.00782807	0.000389612	293.186
JF0401	Faeces	Loxodonta africana	-23.7264	6.96153	45.807	1.65303	27.711	31.0909	July	2004	Dry	Kruger Park	North Central	Granite	Masorini	J Codron et al (2011; Oecologia)	421m	-23.9201	31.2686	0.00305868	0.110614	0.14524	0.70887	4.4783e-06	0.0239947	0	0.00782807	0.000389612	293.186
JF0402	Faeces	Loxodonta africana	-22.9218	4.58623	46.0627	1.38065	33.3632	36.654	July	2004	Dry	Kruger Park	North Central	Granite	Erfplaas	J Codron et al (2011; Oecologia)	414m	-23.9213	31.3037	0.00296942	0.0902963	0.181108	0.702489	4.47876e-06	0.0177941	0	0.00412046	0.00121822	301.546
JF0403	Faeces	Loxodonta africana	-21.4223	7.65878	48.2968	1.69694	28.4611	46.5769	July	2004	Dry	Kruger Park	North Central	Basalt	Letaba	J Codron et al (2011; Oecologia)	266m	-23.8626	31.5591	0.0456433	0.185512	0.315879	0.432079	7.61468e-05	0.00700103	0	0.0095497	0.00425974	297.642
JF0404	Faeces	Loxodonta africana	-23.5714	7.21123	45.3366	1.36048	33.3239	30.4616	July	2004	Dry	Kruger Park	North Central	Basalt	Letaba	J Codron et al (2011; Oecologia)	266m	-23.8626	31.5591	0.0456433	0.185512	0.315879	0.432079	7.61468e-05	0.00700103	0	0.0095497	0.00425974	297.642
JF0405	Faeces	Loxodonta africana	-22.4985	6.64658	43.2309	1.72275	25.0941	38.5073	July	2004	Dry	Kruger Park	North Central	Basalt	Letaba	J Codron et al (2011; Oecologia)	266m	-23.8626	31.5591	0.0456433	0.185512	0.315879	0.432079	7.61468e-05	0.00700103	0	0.0095497	0.00425974	297.642
JF0406	Faeces	Loxodonta africana	-22.7082	5.48148	46.6356	1.45648	32.0194	36.9347	July	2004	Dry	Kruger Park	North Central	Basalt	Letaba	J Codron et al (2011; Oecologia)	266m	-23.8626	31.5591	0.0456433	0.185512	0.315879	0.432079	7.61468e-05	0.00700103	0	0.0095497	0.00425974	297.642
JF0407	Faeces	Loxodonta africana	-25.3737	8.32141	46.2151	1.59792	28.9221	16.9474	July	2004	Dry	Kruger Park	North Central	Basalt	Letaba	J Codron et al (2011; Oecologia)	266m	-23.8626	31.5591	0.0456433	0.185512	0.315879	0.432079	7.61468e-05	0.00700103	0	0.0095497	0.00425974	297.642
JF0408	Faeces	Loxodonta africana	-24.3539	7.61357	47.134	1.32644	35.534	24.5943	July	2004	Dry	Kruger Park	North Central	Basalt	Letaba	J Codron et al (2011; Oecologia)	266m	-23.8626	31.5591	0.0456433	0.185512	0.315879	0.432079	7.61468e-05	0.00700103	0	0.0095497	0.00425974	297.642
JF0409	Faeces	Loxodonta africana	-22.3646	7.17921	46.6228	1.04044	44.8106	39.5114	July	2004	Dry	Kruger Park	North Central	Basalt	Letaba Bridge	J Codron et al (2011; Oecologia)	232m	-23.8126	31.5825	0.0685733	0.117742	0.498571	0.287521	0.000147816	0.00832699	0	0.0132497	0.00586786	316.09
JF0410	Faeces	Loxodonta africana	-22.0046	7.01099	47.8801	1.87314	25.5614	42.2105	July	2004	Dry	Kruger Park	North Central	Basalt	Letaba Bridge	J Codron et al (2011; Oecologia)	232m	-23.8126	31.5825	0.0685733	0.117742	0.498571	0.287521	0.000147816	0.00832699	0	0.0132497	0.00586786	316.09
JF0411	Faeces	Loxodonta africana	-25.5492	6.69618	47.1398	1.70289	27.6823	15.6315	July	2004	Dry	Kruger Park	North Central	Basalt	Letaba Bridge	J Codron et al (2011; Oecologia)	232m	-23.8126	31.5825	0.0685733	0.117742	0.498571	0.287521	0.000147816	0.00832699	0	0.0132497	0.00586786	316.09
JF0412	Faeces	Loxodonta africana	-25.2023	7.62939	48.4532	1.7309	27.993	18.2325	July	2004	Dry	Kruger Park	North Central	Basalt	Letaba Bridge	J Codron et al (2011; Oecologia)	232m	-23.8126	31.5825	0.0685733	0.117742	0.498571	0.287521	0.000147816	0.00832699	0	0.0132497	0.00586786	316.09
JF0413	Faeces	Loxodonta africana	-24.1366	2.98546	37.524	0.8997	41.7073	29.2646	July	2004	Dry	Kruger Park	South Central	Granite	Mzandzeni	J Codron et al (2011; Oecologia)	368m	-24.4795	31.6313	0.00787095	0.267894	0.295611	0.409746	0	0.00375852	0	0.0150699	4.92774e-05	295.534
JF0414	Faeces	Loxodonta africana	-24.0129	7.18962	45.2737	1.38219	32.755	30.1428	July	2004	Dry	Kruger Park	South Central	Granite	Mzandzeni	J Codron et al (2011; Oecologia)	368m	-24.4795	31.6313	0.00787095	0.267894	0.295611	0.409746	0	0.00375852	0	0.0150699	4.92774e-05	295.534
JF0415	Faeces	Loxodonta africana	-25.3031	8.04188	46.5567	1.47214	31.6252	20.9781	July	2004	Dry	Kruger Park	South Central	Granite	Ngwenyeni	J Codron et al (2011; Oecologia)	329m	-24.6096	31.6691	0.0179418	0.34691	0.37202	0.249371	0	0.00271479	0	0.0110428	0	294.795
JF0416	Faeces	Loxodonta africana	-25.1833	7.05061	43.7311	1.52037	28.7635	21.8294	July	2004	Dry	Kruger Park	South Central	Granite	Ngwenyeni	J Codron et al (2011; Oecologia)	329m	-24.6096	31.6691	0.0179418	0.34691	0.37202	0.249371	0	0.00271479	0	0.0110428	0	294.795
JF0417	Faeces	Loxodonta africana	-24.6169	7.95735	46.3668	1.50071	30.8965	25.8522	July	2004	Dry	Kruger Park	South Central	Granite	Ngwenyeni	J Codron et al (2011; Oecologia)	329m	-24.6096	31.6691	0.0179418	0.34691	0.37202	0.249371	0	0.00271479	0	0.0110428	0	294.795
JF0418	Faeces	Loxodonta africana	-25.1578	6.35406	45.2705	1.17663	38.4746	22.0099	July	2004	Dry	Kruger Park	South Central	Granite	Ngwenyeni	J Codron et al (2011; Oecologia)	329m	-24.6096	31.6691	0.0179418	0.34691	0.37202	0.249371	0	0.00271479	0	0.0110428	0	294.795
JF0419	Faeces	Loxodonta africana	-24.578	7.9734	46.1398	1.40618	32.8122	26.1286	July	2004	Dry	Kruger Park	South Central	Granite	Ngwenyeni	J Codron et al (2011; Oecologia)	329m	-24.6096	31.6691	0.0179418	0.34691	0.37202	0.249371	0	0.00271479	0	0.0110428	0	294.795
JF0420	Faeces	Loxodonta africana	-24.758	6.9397	46.154	1.73887	26.5425	24.8503	July	2004	Dry	Kruger Park	South Central	Granite	Ngwenyeni	J Codron et al (2011; Oecologia)	329m	-24.6096	31.6691	0.0179418	0.34691	0.37202	0.249371	0	0.00271479	0	0.0110428	0	294.795
JF0421	Faeces	Loxodonta africana	-25.3527	8.21127	51.417	1.83196	28.0666	20.626	July	2004	Dry	Kruger Park	South Central	Granite	Ngwenyeni	J Codron et al (2011; Oecologia)	329m	-24.6096	31.6691	0.0179418	0.34691	0.37202	0.249371	0	0.00271479	0	0.0110428	0	294.795
JF0422	Faeces	Loxodonta africana	-25.7345	7.1574	47.9653	2.20684	21.7348	17.9137	July	2004	Dry	Kruger Park	South Central	Granite	Ngwenyeni	J Codron et al (2011; Oecologia)	329m	-24.6096	31.6691	0.0179418	0.34691	0.37202	0.249371	0	0.00271479	0	0.0110428	0	294.795
JF0423	Faeces	Loxodonta africana	-25.7092	4.96931	48.9385	1.17625	41.6055	21.515	July	2004	Dry	Kruger Park	South Central	Basalt	Satara	J Codron et al (2011; Oecologia)	266m	-24.6193	31.7938	0.0365522	0.265412	0.45247	0.233905	0	0.00417087	0	0.00749054	0	307.897
JF0424	Faeces	Loxodonta africana	-23.1281	7.91766	47.9081	1.43043	33.4921	38.9414	July	2004	Dry	Kruger Park	South Central	Basalt	N'wanetsi Bridge	J Codron et al (2011; Oecologia)	259m	-24.4196	31.7835	0.0213836	0.0464007	0.736354	0.186346	4.48013e-06	0.00620945	0	0.00314505	0.000156804	361.864
JF0425	Faeces	Loxodonta africana	-23.7895	7.00641	43.5343	1.43481	30.3415	34.4759	July	2004	Dry	Kruger Park	South Central	Basalt	N'wanetsi Bridge	J Codron et al (2011; Oecologia)	259m	-24.4196	31.7835	0.0213836	0.0464007	0.736354	0.186346	4.48013e-06	0.00620945	0	0.00314505	0.000156804	361.864
JF0426	Faeces	Loxodonta africana	-24.1323	7.23061	48.1955	1.957	24.6273	32.1615	July	2004	Dry	Kruger Park	South Central	Basalt	N'wanetsi Bridge	J Codron et al (2011; Oecologia)	259m	-24.4196	31.7835	0.0213836	0.0464007	0.736354	0.186346	4.48013e-06	0.00620945	0	0.00314505	0.000156804	361.864
JF0427	Faeces	Loxodonta africana	-24.7495	7.12028	44.2735	1.35609	32.648	27.9945	July	2004	Dry	Kruger Park	South Central	Basalt	Sweni	J Codron et al (2011; Oecologia)	262m	-24.4331	31.788	0.0213515	0.0478505	0.738352	0.180583	4.47997e-06	0.00714107	0	0.00457852	0.000138879	361.221
JF0428	Faeces	Loxodonta africana	-24.1225	3.44874	42.2837	1.21111	34.9131	32.2276	July	2004	Dry	Kruger Park	South Central	Basalt	N'wanetsi Bridge	J Codron et al (2011; Oecologia)	259m	-24.4196	31.7835	0.0213836	0.0464007	0.736354	0.186346	4.48013e-06	0.00620945	0	0.00314505	0.000156804	361.864
JF0429	Faeces	Loxodonta africana	-25.408	7.26164	44.7149	1.47772	30.2593	23.5484	July	2004	Dry	Kruger Park	South Central	Basalt	Sweni	J Codron et al (2011; Oecologia)	262m	-24.4331	31.788	0.0213515	0.0478505	0.738352	0.180583	4.47997e-06	0.00714107	0	0.00457852	0.000138879	361.221
JF0430	Faeces	Loxodonta africana	-25.978	3.39578	45.5134	1.392	32.6963	19.6996	July	2004	Dry	Kruger Park	South Central	Basalt	Satara	J Codron et al (2011; Oecologia)	266m	-24.6193	31.7938	0.0365522	0.265412	0.45247	0.233905	0	0.00417087	0	0.00749054	0	307.897
JF0431	Faeces	Loxodonta africana	-25.1508	7.08639	43.4483	1.43194	30.3423	25.285	July	2004	Dry	Kruger Park	South Central	Basalt	Satara	J Codron et al (2011; Oecologia)	266m	-24.6193	31.7938	0.0365522	0.265412	0.45247	0.233905	0	0.00417087	0	0.00749054	0	307.897
JF0432	Faeces	Loxodonta africana	-25.5086	7.47676	46.1107	0.979774	47.0626	22.869	July	2004	Dry	Kruger Park	South Central	Basalt	Satara	J Codron et al (2011; Oecologia)	266m	-24.6193	31.7938	0.0365522	0.265412	0.45247	0.233905	0	0.00417087	0	0.00749054	0	307.897
JF0433	Faeces	Loxodonta africana	-25.1286	7.81295	46.1299	1.26615	36.4332	22.2175	July	2004	Dry	Kruger Park	South	Granite	Sabie River	J Codron et al (2011; Oecologia)	282m	-24.9349	31.7017	0.0520047	0.375286	0.101451	0.449254	2.23984e-05	0.00494557	0	0.0156699	0.0013663	255.614
JF0434	Faeces	Loxodonta africana	-23.9138	5.9808	44.4984	1.14794	38.7636	30.8471	July	2004	Dry	Kruger Park	South	Granite	Sabie River	J Codron et al (2011; Oecologia)	282m	-24.9349	31.7017	0.0520047	0.375286	0.101451	0.449254	2.23984e-05	0.00494557	0	0.0156699	0.0013663	255.614
JF0435	Faeces	Loxodonta africana	-25.9009	7.51266	46.3662	1.33893	34.6293	16.7313	July	2004	Dry	Kruger Park	South	Granite	Sabie River	J Codron et al (2011; Oecologia)	282m	-24.9349	31.7017	0.0520047	0.375286	0.101451	0.449254	2.23984e-05	0.00494557	0	0.0156699	0.0013663	255.614
JF0436	Faeces	Loxodonta africana	-26.3435	8.54324	45.8826	1.36421	33.6332	13.5876	July	2004	Dry	Kruger Park	South	Granite	Sabie River	J Codron et al (2011; Oecologia)	282m	-24.9349	31.7017	0.0520047	0.375286	0.101451	0.449254	2.23984e-05	0.00494557	0	0.0156699	0.0013663	255.614
JF0437	Faeces	Loxodonta africana	-25.6669	8.54225	48.7074	1.53288	31.775	18.3936	July	2004	Dry	Kruger Park	South	Granite	Sabie River	J Codron et al (2011; Oecologia)	282m	-24.9349	31.7017	0.0520047	0.375286	0.101451	0.449254	2.23984e-05	0.00494557	0	0.0156699	0.0013663	255.614
JF0438	Faeces	Loxodonta africana	-25.5291	8.54839	50.1006	1.37349	36.4769	19.3727	July	2004	Dry	Kruger Park	South	Granite	Sabie River	J Codron et al (2011; Oecologia)	282m	-24.9349	31.7017	0.0520047	0.375286	0.101451	0.449254	2.23984e-05	0.00494557	0	0.0156699	0.0013663	255.614
JF0439	Faeces	Loxodonta africana	-26.0582	7.94729	48.2203	1.73186	27.843	15.6144	July	2004	Dry	Kruger Park	South	Granite	H1-1 Skukuza	J Codron et al (2011; Oecologia)	305m	-25.0129	31.5889	0.0802134	0.570233	0.036073	0.291746	1.34383e-05	0.00807196	0	0.0106208	0.0030281	224.021
JF0440	Faeces	Loxodonta africana	-26.216	8.76301	46.3526	1.77676	26.0883	14.4929	July	2004	Dry	Kruger Park	South	Granite	H1-1 Skukuza	J Codron et al (2011; Oecologia)	305m	-25.0129	31.5889	0.0802134	0.570233	0.036073	0.291746	1.34383e-05	0.00807196	0	0.0106208	0.0030281	224.021
[truncated: 387 more rows]

## Sheet: 12km_buffer
Sample_ID	Material	Species	d13C	d15N	%C	%N	C/N	%C4	Month	Year	Season	Reserve	Part	Geology	Site_Name	FirstPublication	Elevation	latitude	longitude	CDW%	ODW%	CG%	DG%	AG%	BU%	CCW%	BA%	WA%	grassiness index
[truncated: 611 more rows]

## Sheet: Land cover class codes
Land cover class code	Land cover class
[truncated: 10 more rows]
